# Supplementary material for: Inequalities in healthcare disruptions during the COVID-19 pandemic: evidence from 12 UK population-based longitudinal studies
Source: PubMed Central journal article supplement (PMC9561494; doi:10.1136/bmjopen-2022-064981), 2022-10-13

## Supplementary File 3: Meta-analysis results

---

### Contents

|                                     |    |
|-------------------------------------|----|
| Summary of results.....             | 3  |
| Summary of stratified results.....  | 6  |
| Any healthcare disruption.....      | 10 |
| Sex.....                            | 10 |
| Unadjusted.....                     | 10 |
| Basic adjustment.....               | 11 |
| Full adjustment.....                | 12 |
| Occupational class.....             | 13 |
| Unadjusted.....                     | 13 |
| Basic adjustment.....               | 15 |
| Full adjustment.....                | 17 |
| Education.....                      | 19 |
| Unadjusted.....                     | 19 |
| Basic adjustment.....               | 21 |
| Full adjustment.....                | 23 |
| Age.....                            | 25 |
| Unadjusted.....                     | 25 |
| Basic adjustment.....               | 27 |
| Full adjustment.....                | 29 |
| Ethnicity.....                      | 31 |
| Unadjusted.....                     | 31 |
| Basic adjustment.....               | 34 |
| Full adjustment.....                | 38 |
| Appointments.....                   | 41 |
| Sex.....                            | 41 |
| Unadjusted.....                     | 41 |
| Basic adjustment.....               | 42 |
| Full adjustment.....                | 43 |
| Occupational class.....             | 44 |
| Unadjusted.....                     | 44 |
| Basic adjustment.....               | 46 |
| Full adjustment.....                | 48 |
| Education.....                      | 50 |
| Unadjusted.....                     | 50 |
| Basic adjustment.....               | 52 |
| Full Adjustment.....                | 54 |
| Age.....                            | 56 |
| Unadjusted.....                     | 56 |
| Basic adjustment.....               | 58 |
| Full adjustment.....                | 60 |
| Ethnicity.....                      | 62 |
| Unadjusted.....                     | 62 |
| Basic adjustment.....               | 65 |
| Full adjustment.....                | 68 |
| Prescription/Medication access..... | 71 |
| Sex.....                            | 71 |
| Unadjusted.....                     | 71 |
| Basic adjustment.....               | 72 |
| Full adjustment.....                | 73 |
| Occupational class.....             | 74 |

|                                                               |     |
|---------------------------------------------------------------|-----|
| Unadjusted.....                                               | 74  |
| Basic adjustment.....                                         | 76  |
| Full adjustment.....                                          | 78  |
| Education.....                                                | 80  |
| Unadjusted.....                                               | 80  |
| Basic adjustment.....                                         | 82  |
| Full adjustment.....                                          | 84  |
| Age.....                                                      | 86  |
| Unadjusted.....                                               | 86  |
| Basic adjustment.....                                         | 89  |
| Full adjustment.....                                          | 91  |
| Ethnicity.....                                                | 93  |
| Unadjusted.....                                               | 93  |
| Basic adjustment.....                                         | 96  |
| Full adjustment.....                                          | 99  |
| Procedures/surgery.....                                       | 102 |
| Sex.....                                                      | 102 |
| Unadjusted.....                                               | 102 |
| Basic adjustment.....                                         | 103 |
| Full adjustment.....                                          | 104 |
| Occupational class.....                                       | 105 |
| Unadjusted.....                                               | 105 |
| Basic adjustment.....                                         | 107 |
| Full adjustment.....                                          | 109 |
| Education.....                                                | 111 |
| unadjusted.....                                               | 111 |
| Basic adjustment.....                                         | 113 |
| Full adjustment.....                                          | 115 |
| Age.....                                                      | 117 |
| Unadjusted.....                                               | 117 |
| Basic adjustment.....                                         | 120 |
| Full adjustment.....                                          | 122 |
| Ethnicity.....                                                | 123 |
| Unadjusted.....                                               | 123 |
| Basic adjustment.....                                         | 126 |
| Full adjustment.....                                          | 129 |
| Any healthcare disruption stratified by shielding status..... | 131 |
| Sex.....                                                      | 131 |
| Occupational class.....                                       | 132 |
| Education.....                                                | 136 |
| Age.....                                                      | 140 |
| Ethnicity.....                                                | 143 |
| Any healthcare disruption stratified by age.....              | 148 |
| Sex.....                                                      | 148 |
| Occupational class.....                                       | 149 |
| Education.....                                                | 152 |
| Ethnicity.....                                                | 155 |

## Summary of results

|                  | Any healthcare disruption |             |             |                  | Appointments |             |             |                  | Prescription/Medication |             |             |                  | Procedures/surgery |                |             |                  |              |
|------------------|---------------------------|-------------|-------------|------------------|--------------|-------------|-------------|------------------|-------------------------|-------------|-------------|------------------|--------------------|----------------|-------------|------------------|--------------|
|                  | OR                        | Lower CI    | Upper CI    | I <sup>2</sup> % | OR           | Lower CI    | Upper CI    | I <sup>2</sup> % | OR                      | Lower CI    | Upper CI    | I <sup>2</sup> % | OR                 | Lower CI       | Upper CI    | I <sup>2</sup> % |              |
| <b>Sex</b>       |                           |             |             |                  |              |             |             |                  |                         |             |             |                  |                    |                |             |                  |              |
| Female vs. Male  | Unadjusted                | 1.26        | 1.14        | 1.39             | 58.51        | 1.30        | 1.12        | 1.52             | 73.54                   | 1.33        | 1.00        | 1.77             | 75.15              | 1.12           | 0.93        | 1.36             | 60.28        |
|                  | <b>Basic adjustment</b>   | <b>1.27</b> | <b>1.15</b> | <b>1.40</b>      | <b>53.11</b> | <b>1.33</b> | <b>1.17</b> | <b>1.52</b>      | <b>60</b>               | <b>1.27</b> | <b>0.94</b> | <b>1.74</b>      | <b>77.98</b>       | <b>1.15</b>    | <b>0.97</b> | <b>1.37</b>      | <b>47.79</b> |
|                  | Full adjustment           | 1.30        | 1.15        | 1.46             | 44.89        | 1.41        | 1.10        | 1.82             | 0.00                    | 1.18        | 0.50        | 2.77             | 59.02              | 1.09           | 0.77        | 1.55             | 18.15        |
| <b>Age</b>       |                           |             |             |                  |              |             |             |                  |                         |             |             |                  |                    |                |             |                  |              |
| 16-24y vs 45-54y | Unadjusted                | 0.77        | 0.41        | 1.47             | 71.12        | 0.55        | 0.26        | 1.20             | 55.5                    | 1.17        | 0.34        | 4.05             | 86.43              | 0.48           | 0.34        | 0.68             |              |
|                  | <b>Basic adjustment</b>   | <b>0.76</b> | <b>0.39</b> | <b>1.46</b>      | <b>71.95</b> | <b>0.55</b> | <b>0.24</b> | <b>1.23</b>      | <b>58.53</b>            | <b>1.09</b> | <b>0.33</b> | <b>3.67</b>      | <b>85.53</b>       | <b>0.47</b>    | <b>0.33</b> | <b>0.66</b>      |              |
|                  | Full adjustment           | 0.85        | 0.32        | 2.24             | 70.28        | 0.89        | 0.18        | 4.36             |                         | 4.71        | 1.40        | 15.86            |                    | no information |             |                  |              |
| 25-34y vs 45-54y | Unadjusted                | 0.87        | 0.71        | 1.07             | 51.9         | 0.71        | 0.53        | 0.96             | 72.25                   | 1.23        | 0.75        | 2.03             | 74.54              | 0.78           | 0.59        | 1.02             | 0            |
|                  | <b>Basic adjustment</b>   | <b>0.85</b> | <b>0.70</b> | <b>1.04</b>      | <b>47.62</b> | <b>0.67</b> | <b>0.57</b> | <b>0.77</b>      | <b>0</b>                | <b>1.16</b> | <b>0.68</b> | <b>1.96</b>      | <b>76.95</b>       | <b>0.77</b>    | <b>0.58</b> | <b>1.03</b>      | <b>0</b>     |
|                  | Full adjustment           | 0.92        | 0.74        | 1.15             | 43.99        | 1.21        | 0.66        | 2.22             |                         | 1.18        | 0.52        | 2.67             | 0                  | no information |             |                  |              |
| 35-44y vs 45-54y | Unadjusted                | 0.93        | 0.74        | 1.16             | 67.57        | 0.77        | 0.66        | 0.89             | 23.09                   | 1.06        | 0.75        | 1.51             | 57.05              | 0.99           | 0.71        | 1.36             | 42.96        |
|                  | <b>Basic adjustment</b>   | <b>0.92</b> | <b>0.74</b> | <b>1.15</b>      | <b>68.24</b> | <b>0.78</b> | <b>0.65</b> | <b>0.92</b>      | <b>35.96</b>            | <b>1.04</b> | <b>0.74</b> | <b>1.47</b>      | <b>56.72</b>       | <b>1.03</b>    | <b>0.67</b> | <b>1.58</b>      | <b>61.87</b> |
|                  | Full adjustment           | 1.03        | 0.81        | 1.29             | 59.88        | 1.03        | 0.59        | 1.78             |                         | 1.25        | 0.62        | 2.52             | 0                  | 1.36           | 0.93        | 2.00             | 0            |
| 55-64y vs 45-54y | Unadjusted                | 1.16        | 0.98        | 1.38             | 63.54        | 1.33        | 1.21        | 1.47             | 0                       | 0.79        | 0.57        | 1.08             | 61.08              | 1.17           | 0.65        | 2.10             | 91.47        |
|                  | <b>Basic adjustment</b>   | <b>1.18</b> | <b>0.99</b> | <b>1.39</b>      | <b>64.04</b> | <b>1.35</b> | <b>1.22</b> | <b>1.49</b>      | <b>0</b>                | <b>0.79</b> | <b>0.57</b> | <b>1.10</b>      | <b>65.97</b>       | <b>1.18</b>    | <b>0.66</b> | <b>2.10</b>      | <b>89.83</b> |
|                  | Full adjustment           | 1.17        | 1.05        | 1.29             | 0            | 1.55        | 0.62        | 3.91             | 49.89                   | 0.85        | 0.48        | 1.52             | 0                  | no information |             |                  |              |
| 65-74y vs 45-54y | Unadjusted                | 1.36        | 1.11        | 1.67             | 75.24        | 1.61        | 1.46        | 1.78             | 0                       | 0.73        | 0.48        | 1.11             | 79.59              | 1.93           | 1.67        | 2.23             | 0            |
|                  | <b>Basic adjustment</b>   | <b>1.39</b> | <b>1.13</b> | <b>1.72</b>      | <b>77.16</b> | <b>1.65</b> | <b>1.49</b> | <b>1.82</b>      | <b>0</b>                | <b>0.75</b> | <b>0.49</b> | <b>1.16</b>      | <b>80.63</b>       | <b>1.95</b>    | <b>1.68</b> | <b>2.26</b>      | <b>0</b>     |
|                  | Full adjustment           | 1.33        | 1.19        | 1.49             | 0            | 1.98        | 0.48        | 8.10             | 73.94                   | 1.15        | 0.65        | 2.04             | 0                  | 1.57           | 1.07        | 2.31             | 0            |
| 75y+ vs 45-54y   | Unadjusted                | 1.45        | 0.92        | 2.29             | 90.02        | 1.83        | 1.59        | 2.12             | 0                       | 0.66        | 0.46        | 0.94             | 47.94              | 2.05           | 1.59        | 2.64             | 28.83        |
|                  | <b>Basic adjustment</b>   | <b>1.50</b> | <b>0.93</b> | <b>2.39</b>      | <b>91.23</b> | <b>1.89</b> | <b>1.65</b> | <b>2.17</b>      | <b>0</b>                | <b>0.69</b> | <b>0.47</b> | <b>1.01</b>      | <b>53.79</b>       | <b>2.07</b>    | <b>1.66</b> | <b>2.59</b>      | <b>17.97</b> |
|                  | Full adjustment           | 1.16        | 0.86        | 1.58             | 62.75        | 1.07        | 0.44        | 2.61             |                         | 0.78        | 0.39        | 1.57             | 1.68               | 1.75           | 1.17        | 2.62             |              |
| <b>Ethnicity</b> |                           |             |             |                  |              |             |             |                  |                         |             |             |                  |                    |                |             |                  |              |

|                                               |                         |             |             |             |              |             |             |             |              |                |             |             |              |                |             |             |              |
|-----------------------------------------------|-------------------------|-------------|-------------|-------------|--------------|-------------|-------------|-------------|--------------|----------------|-------------|-------------|--------------|----------------|-------------|-------------|--------------|
| Non-White vs White*                           | Unadjusted              | 1.02        | 0.89        | 1.18        | 10.29        | 0.95        | 0.72        | 1.25        | 56.69        | 1.36           | 0.79        | 2.33        | 79.57        | 0.89           | 0.71        | 1.12        | 0            |
|                                               | <b>Basic adjustment</b> | <b>1.19</b> | <b>1.05</b> | <b>1.35</b> | <b>0</b>     | <b>1.10</b> | <b>0.86</b> | <b>1.39</b> | <b>42.54</b> | <b>1.32</b>    | <b>0.82</b> | <b>2.12</b> | <b>71.12</b> | <b>1.14</b>    | <b>0.91</b> | <b>1.44</b> | <b>0</b>     |
|                                               | Full adjustment         | 1.09        | 0.96        | 1.25        | 0            | 1.15        | 0.83        | 1.61        | 0            | 1.97           | 1.08        | 3.62        | 0            | 1.68           | 0.36        | 7.76        | 62.98        |
| Black vs White                                | Unadjusted              | 1.16        | 0.87        | 1.55        | 0            | 0.95        | 0.54        | 1.64        | 33.95        | 0.63           | 0.13        | 3.06        | 81.71        | 0.87           | 0.58        | 1.29        | 0            |
|                                               | <b>Basic adjustment</b> | <b>1.38</b> | <b>1.03</b> | <b>1.84</b> | <b>0</b>     | <b>1.01</b> | <b>0.54</b> | <b>1.92</b> | <b>49.83</b> | <b>0.64</b>    | <b>0.14</b> | <b>2.87</b> | <b>80</b>    | <b>1.03</b>    | <b>0.68</b> | <b>1.55</b> | <b>0</b>     |
|                                               | Full adjustment         | 1.15        | 0.86        | 1.53        | 4.01         | 0.81        | 0.23        | 2.83        | 0            | 0.37           | 0.04        | 3.11        |              | 0.87           | 0.41        | 1.82        |              |
| East Asian vs White                           | Unadjusted              | 0.97        | 0.56        | 1.68        | 0            | 0.61        | 0.28        | 1.30        | 12.51        | 2.34           | 0.39        | 14.15       | 88.19        | 1.23           | 0.48        | 3.15        | 0            |
|                                               | <b>Basic adjustment</b> | <b>1.13</b> | <b>0.67</b> | <b>1.90</b> | <b>0</b>     | <b>0.80</b> | <b>0.39</b> | <b>1.64</b> | <b>17.46</b> | <b>1.95</b>    | <b>0.53</b> | <b>7.24</b> | <b>79.39</b> | <b>1.61</b>    | <b>0.61</b> | <b>4.22</b> | <b>0</b>     |
|                                               | Full adjustment         | 0.96        | 0.60        | 1.51        | 0            | 1.19        | 0.26        | 5.51        |              | no information |             |             |              | no information |             |             |              |
| Mixed vs White                                | Unadjusted              | 1.05        | 0.79        | 1.38        | 0            | 1.02        | 0.55        | 1.89        | 64.07        | 1.51           | 0.99        | 2.30        | 0            | 1.05           | 0.66        | 1.67        | 0            |
|                                               | <b>Basic adjustment</b> | <b>1.24</b> | <b>0.86</b> | <b>1.78</b> | <b>27.61</b> | <b>1.22</b> | <b>0.69</b> | <b>2.15</b> | <b>56.82</b> | <b>1.34</b>    | <b>0.82</b> | <b>2.18</b> | <b>16.29</b> | <b>1.34</b>    | <b>0.76</b> | <b>2.36</b> | <b>20.19</b> |
|                                               | Full adjustment         | 1.25        | 0.88        | 1.77        | 15.86        | 1.61        | 0.80        | 3.22        | 51.21        | 0.93           | 0.10        | 8.48        |              | 0.85           | 0.32        | 2.21        |              |
| South Asian vs White                          | Unadjusted              | 0.85        | 0.61        | 1.18        | 64.69        | 0.92        | 0.59        | 1.42        | 67.42        | 0.99           | 0.36        | 2.72        | 89.3         | 0.68           | 0.45        | 1.04        | 18           |
|                                               | <b>Basic adjustment</b> | <b>1.05</b> | <b>0.84</b> | <b>1.32</b> | <b>28.25</b> | <b>1.11</b> | <b>0.88</b> | <b>1.39</b> | <b>12.68</b> | <b>0.98</b>    | <b>0.38</b> | <b>2.54</b> | <b>87.94</b> | <b>0.89</b>    | <b>0.64</b> | <b>1.24</b> | <b>0</b>     |
|                                               | Full adjustment         | 0.93        | 0.67        | 1.30        | 57.84        | 1.03        | 0.29        | 3.63        |              | 2.81           | 1.19        | 6.63        | 11.86        | 1.11           | 0.62        | 1.99        |              |
| Other Ethnicity vs White                      | Unadjusted              | 0.79        | 0.46        | 1.34        | 28.89        | 0.91        | 0.58        | 1.45        | 0            | 1.23           | 0.56        | 2.67        | 25.72        | 0.84           | 0.20        | 3.48        | 44.62        |
|                                               | <b>Basic adjustment</b> | <b>0.90</b> | <b>0.49</b> | <b>1.63</b> | <b>44.27</b> | <b>1.07</b> | <b>0.68</b> | <b>1.68</b> | <b>0</b>     | <b>1.45</b>    | <b>0.81</b> | <b>2.60</b> | <b>0</b>     | <b>0.95</b>    | <b>0.23</b> | <b>4.03</b> | <b>52.56</b> |
|                                               | Full adjustment         | 0.82        | 0.45        | 1.50        | 35.18        | 1.97        | 1.08        | 3.62        | 0.00         | 3.74           | 0.39        | 35.91       |              | no information |             |             |              |
| <b>Education</b>                              |                         |             |             |             |              |             |             |             |              |                |             |             |              |                |             |             |              |
| A-level/equivalent vs Higher education/Degree | Unadjusted              | 1.04        | 0.91        | 1.17        | 58.16        | 1.03        | 0.91        | 1.17        | 42.88        | 0.94           | 0.77        | 1.15        | 21.54        | 0.84           | 0.55        | 1.29        | 88.56        |
|                                               | <b>Basic adjustment</b> | <b>1.08</b> | <b>0.97</b> | <b>1.20</b> | <b>38.7</b>  | <b>1.07</b> | <b>0.99</b> | <b>1.16</b> | <b>0</b>     | <b>1.02</b>    | <b>0.82</b> | <b>1.28</b> | <b>27.13</b> | <b>0.87</b>    | <b>0.58</b> | <b>1.30</b> | <b>85.92</b> |
|                                               | Full adjustment         | 1.01        | 0.92        | 1.11        | 0            | 0.97        | 0.76        | 1.25        | 0            | 1.61           | 0.63        | 4.12        | 59.22        | 1.03           | 0.82        | 1.29        | 0            |
| GCSE/equivalent vs Higher education/Degree    | Unadjusted              | 0.99        | 0.87        | 1.14        | 62.23        | 1.03        | 0.95        | 1.12        | 0            | 0.98           | 0.75        | 1.27        | 53.81        | 1.03           | 0.91        | 1.16        | 0            |
|                                               | <b>Basic adjustment</b> | <b>1.00</b> | <b>0.87</b> | <b>1.14</b> | <b>59.18</b> | <b>1.01</b> | <b>0.91</b> | <b>1.12</b> | <b>15.22</b> | <b>1.04</b>    | <b>0.77</b> | <b>1.39</b> | <b>62.34</b> | <b>1.05</b>    | <b>0.93</b> | <b>1.18</b> | <b>0</b>     |
|                                               | Full adjustment         | 0.91        | 0.81        | 1.02        | 48.6         | 0.86        | 0.66        | 1.12        | 0            | 1.01           | 0.63        | 1.61        | 1.57         | 0.82           | 0.64        | 1.05        | 0            |
| <GCSE/equivalent vs Higher education/Degree   | Unadjusted              | 1.06        | 0.88        | 1.28        | 76.55        | 1.09        | 0.92        | 1.29        | 52.88        | 1.07           | 0.74        | 1.54        | 69.78        | 1.45           | 1.28        | 1.64        | 0            |
|                                               | <b>Basic adjustment</b> | <b>1.05</b> | <b>0.91</b> | <b>1.21</b> | <b>53.17</b> | <b>1.01</b> | <b>0.86</b> | <b>1.18</b> | <b>42.42</b> | <b>1.17</b>    | <b>0.82</b> | <b>1.67</b> | <b>63.42</b> | <b>1.26</b>    | <b>1.11</b> | <b>1.44</b> | <b>0</b>     |
|                                               | Full adjustment         | 0.87        | 0.75        | 1.00        | 34.17        | 0.90        | 0.54        | 1.50        | 58.54        | 1.17           | 0.39        | 3.49        | 60.69        | 1.53           | 0.34        | 6.85        | 71.25        |
| <b>Occupational class</b>                     |                         |             |             |             |              |             |             |             |              |                |             |             |              |                |             |             |              |



|                                                     |                         |             |             |             |              |             |             |             |              |             |             |             |              |             |             |             |              |
|-----------------------------------------------------|-------------------------|-------------|-------------|-------------|--------------|-------------|-------------|-------------|--------------|-------------|-------------|-------------|--------------|-------------|-------------|-------------|--------------|
| Intermediate vs Managerial/Admin/Professional       | Unadjusted              | 1.08        | 1.00        | 1.16        | 0            | 1.01        | 0.91        | 1.14        | 22.79        | 1.09        | 0.83        | 1.42        | 41.19        | 1.19        | 1.05        | 1.34        | 0            |
|                                                     | <b>Basic adjustment</b> | <b>1.07</b> | <b>0.99</b> | <b>1.15</b> | <b>0</b>     | <b>1.01</b> | <b>0.93</b> | <b>1.10</b> | <b>0</b>     | <b>1.10</b> | <b>0.88</b> | <b>1.38</b> | <b>26.19</b> | <b>1.16</b> | <b>1.03</b> | <b>1.31</b> | <b>0</b>     |
|                                                     | Full adjustment         | 1.00        | 0.92        | 1.08        | 0            | 1.01        | 0.78        | 1.30        | 0            | 0.73        | 0.34        | 1.61        | 0            | 0.78        | 0.42        | 1.47        | 48.08        |
| Manual/Routine vs Managerial/Admin/Professional     | Unadjusted              | 1.13        | 1.03        | 1.23        | 12.12        | 1.04        | 0.90        | 1.20        | 36.16        | 1.38        | 1.16        | 1.64        | 0            | 1.11        | 0.91        | 1.35        | 25.25        |
|                                                     | <b>Basic adjustment</b> | <b>1.17</b> | <b>1.08</b> | <b>1.27</b> | <b>0</b>     | <b>1.07</b> | <b>0.93</b> | <b>1.23</b> | <b>28.46</b> | <b>1.36</b> | <b>1.11</b> | <b>1.67</b> | <b>8.93</b>  | <b>1.17</b> | <b>1.03</b> | <b>1.33</b> | <b>0</b>     |
|                                                     | Full adjustment         | 1.02        | 0.93        | 1.12        | 0            | 1.10        | 0.84        | 1.44        | 6.05         | 0.51        | 0.18        | 1.43        | 23.27        | 0.92        | 0.56        | 1.50        | 20.63        |
| Other social class vs Managerial/Admin/Professional | Unadjusted              | 1.47        | 1.02        | 2.13        | 89.12        | 1.41        | 1.08        | 1.84        | 66.23        | 2.16        | 1.30        | 3.57        | 76.1         | 1.71        | 0.94        | 3.10        | 87.16        |
|                                                     | <b>Basic adjustment</b> | <b>1.51</b> | <b>1.12</b> | <b>2.04</b> | <b>79.69</b> | <b>1.46</b> | <b>1.16</b> | <b>1.84</b> | <b>47.81</b> | <b>2.45</b> | <b>1.72</b> | <b>3.50</b> | <b>45.5</b>  | <b>1.81</b> | <b>1.17</b> | <b>2.80</b> | <b>73.85</b> |
|                                                     | Full adjustment         | 1.19        | 1.00        | 1.43        | 39.12        | 1.30        | 0.85        | 1.99        | 0.00         | 1.42        | 0.13        | 15.78       | 76.18        | 0.94        | 0.69        | 1.27        |              |

Basic adjustment: sex, age, and ethnicity (where available)

Full adjustment: sex, age, and ethnicity (where available) education, occupational class, UK Nation (where appropriate), household composition, and pre-pandemic self-reported health.

Empty I<sup>2</sup>% column indicates only one study included

\*Binary variable including Black, East Asian, Mixed, South Asian, and other ethnicity in 'non-White'

## Summary of stratified results

|                     |               | Any healthcare disruption |          |          |       |
|---------------------|---------------|---------------------------|----------|----------|-------|
| Sex                 |               | OR                        | Lower CI | Upper CI | I2%   |
| Female vs. Male     | Overall       | 1.27                      | 1.15     | 1.40     | 53.11 |
|                     | Not shielding | 1.26                      | 1.12     | 1.43     | 61.12 |
|                     | Shielding     | 1.37                      | 1.15     | 1.63     | 0     |
|                     | 16-24y        | 2.22                      | 1.63     | 3.02     | 0     |
|                     | 25-34y        | 1.56                      | 1.30     | 1.87     | 0     |
|                     | 35-44y        | 1.51                      | 1.23     | 1.86     | 0     |
|                     | 45-54         | 1.72                      | 1.35     | 2.18     | 36.61 |
|                     | 55-64         | 1.09                      | 0.92     | 1.30     | 59.58 |
|                     | 75+           | 1.08                      | 0.90     | 1.30     | 20    |
| Age                 |               | OR                        | Lower CI | Upper CI | I2%   |
| 16-24y vs 45-54y    | Overall       | 0.76                      | 0.39     | 1.46     | 71.95 |
|                     | Not shielding | 0.79                      | 0.40     | 1.56     | 70.32 |
|                     | Shielding     | 0.64                      | 0.23     | 1.78     |       |
| 25-34y vs 45-54y    | Overall       | 0.85                      | 0.70     | 1.04     | 47.62 |
|                     | Not shielding | 0.86                      | 0.70     | 1.06     | 43.4  |
|                     | Shielding     | 1.09                      | 0.61     | 1.95     | 0     |
| 35-44y vs 45-54y    | Overall       | 0.92                      | 0.74     | 1.15     | 68.24 |
|                     | Not shielding | 0.95                      | 0.74     | 1.21     | 68.26 |
|                     | Shielding     | 0.68                      | 0.34     | 1.34     | 47.41 |
| 55-64y vs 45-54y    | Overall       | 1.18                      | 0.99     | 1.39     | 64.04 |
|                     | Not shielding | 1.21                      | 1.02     | 1.43     | 53.82 |
|                     | Shielding     | 1.24                      | 0.87     | 1.77     | 0     |
| 65-74y vs 45-54y    | Overall       | 1.39                      | 1.13     | 1.72     | 77.16 |
|                     | Not shielding | 1.44                      | 1.20     | 1.72     | 64.1  |
|                     | Shielding     | 1.11                      | 0.79     | 1.56     | 0     |
| 75y+ vs 45-54y      | Overall       | 1.50                      | 0.93     | 2.39     | 91.23 |
|                     | Not shielding | 1.61                      | 1.17     | 2.22     | 79.38 |
|                     | Shielding     | 0.83                      | 0.51     | 1.37     | 32.84 |
| Ethnicity           |               | OR                        | Lower CI | Upper CI | I2%   |
| Non-White vs White* | Overall       | 1.19                      | 1.05     | 1.35     | 0     |
|                     | Not shielding | 1.06                      | 0.86     | 1.31     | 41.46 |
|                     | Shielding     | 1.62                      | 1.08     | 2.43     | 0     |
|                     | 16-24y        | 1.30                      | 0.89     | 1.89     | 0     |
|                     | 25-34y        | 0.92                      | 0.65     | 1.29     | 36.48 |
|                     | 35-44y        | 1.31                      | 1.01     | 1.71     | 0     |
|                     | 45-54         | 1.61                      | 1.16     | 2.22     | 0     |
|                     | 55-64         | 1.13                      | 0.85     | 1.50     | 0     |

|                          |               |      |                |       |       |
|--------------------------|---------------|------|----------------|-------|-------|
|                          | 75+           | 1.28 | 0.67           | 2.45  | 0     |
| Black vs White           | Overall       | 1.38 | 1.03           | 1.84  | 0     |
|                          | Not shielding | 0.80 | 0.43           | 1.49  | 58.06 |
|                          | Shielding     | 1.60 | 0.67           | 3.83  | 0     |
|                          | 16-24y        | 1.15 | 0.51           | 2.59  | 0     |
|                          | 25-34y        | 0.82 | 0.40           | 1.68  | 0     |
|                          | 35-44y        | 1.91 | 0.81           | 4.48  | 0     |
|                          | 45-54         | 1.99 | 0.93           | 4.25  | 15.25 |
|                          | 55-64         | 1.69 | 1.00           | 2.84  | 0     |
|                          | 75+           | 1.23 | 0.42           | 3.56  | 0     |
| East Asian vs White      | Overall       | 1.13 | 0.67           | 1.90  | 0     |
|                          | Not shielding | 0.95 | 0.54           | 1.68  | 0     |
|                          | Shielding     |      | no information |       |       |
|                          | 16-24y        | 0.01 | 0.00           | 0.05  |       |
|                          | 25-34y        | 0.62 | 0.20           | 1.92  | 0     |
|                          | 35-44y        | 1.63 | 0.80           | 3.32  | 0     |
|                          | 45-54         | 1.75 | 0.54           | 5.64  | 0     |
|                          | 55-64         | 0.96 | 0.43           | 2.15  | 0     |
|                          | 75+           |      | no information |       |       |
| Mixed vs White           | Overall       | 1.24 | 0.86           | 1.78  | 27.61 |
|                          | Not shielding | 1.18 | 0.85           | 1.62  | 0     |
|                          | Shielding     | 1.85 | 0.71           | 4.77  | 0     |
|                          | 16-24y        | 2.50 | 1.25           | 5.02  | 0     |
|                          | 25-34y        | 1.26 | 0.79           | 2.02  | 0     |
|                          | 35-44y        | 1.15 | 0.23           | 5.69  | 73.12 |
|                          | 45-54         | 0.92 | 0.46           | 1.87  | 0     |
|                          | 55-64         | 1.06 | 0.53           | 2.11  | 0     |
|                          | 75+           | 1.47 | 0.34           | 6.42  | 22.46 |
| South Asian vs White     | Overall       | 1.05 | 0.84           | 1.32  | 28.25 |
|                          | Not shielding | 0.98 | 0.75           | 1.28  | 35.03 |
|                          | Shielding     | 1.44 | 0.87           | 2.38  | 0     |
|                          | 16-24y        | 0.98 | 0.62           | 1.53  | 13.95 |
|                          | 25-34y        | 0.80 | 0.38           | 1.71  | 74.73 |
|                          | 35-44y        | 1.11 | 0.80           | 1.55  | 10.1  |
|                          | 45-54         | 1.67 | 0.43           | 6.48  | 82    |
|                          | 55-64         | 0.82 | 0.44           | 1.56  | 14.81 |
|                          | 75+           | 1.11 | 0.40           | 3.12  | 0     |
| Other Ethnicity vs White | Overall       | 0.90 | 0.49           | 1.63  | 44.27 |
|                          | Not shielding | 0.85 | 0.45           | 1.62  | 43.11 |
|                          | Shielding     | 0.75 | 0.11           | 4.96  | 10.15 |
|                          | 16-24y        | 0.18 | 0.00           | 15.35 | 88.56 |
|                          | 25-34y        | 0.80 | 0.31           | 2.08  | 49.28 |

|                                                      |               |           |                 |                 |            |
|------------------------------------------------------|---------------|-----------|-----------------|-----------------|------------|
|                                                      | 35-44y        | 1.41      | 0.58            | 3.40            | 0          |
|                                                      | 45-54         | 1.74      | 0.56            | 5.45            | 29.75      |
|                                                      | 55-64         | 0.77      | 0.27            | 2.22            | 0          |
|                                                      | 75+           | 4.18      | 0.35            | 50.04           |            |
| <b>Education</b>                                     |               | <b>OR</b> | <b>Lower CI</b> | <b>Upper CI</b> | <b>I2%</b> |
| A-level/equivalent vs<br>Higher<br>education/Degree  | Overall       | 1.08      | 0.97            | 1.20            | 38.7       |
|                                                      | Not shielding | 1.09      | 0.96            | 1.23            | 39.28      |
|                                                      | Shielding     | 0.95      | 0.74            | 1.22            | 0          |
|                                                      | 16-24y        | 1.33      | 0.93            | 1.90            | 0          |
|                                                      | 25-34y        | 0.99      | 0.69            | 1.42            | 62.16      |
|                                                      | 35-44y        | 1.62      | 1.28            | 2.05            | 0          |
|                                                      | 45-54         | 1.13      | 0.96            | 1.34            | 0          |
|                                                      | 55-64         | 1.01      | 0.89            | 1.14            | 0          |
|                                                      | 75+           | 0.96      | 0.65            | 1.40            | 57.49      |
| GCSE/equivalent vs<br>Higher<br>education/Degree     | Overall       | 1.00      | 0.87            | 1.14            | 59.18      |
|                                                      | Not shielding | 0.99      | 0.84            | 1.17            | 64.95      |
|                                                      | Shielding     | 0.80      | 0.62            | 1.04            | 0          |
|                                                      | 16-24y        | 0.94      | 0.49            | 1.81            | 64.06      |
|                                                      | 25-34y        | 1.24      | 0.80            | 1.94            | 69.1       |
|                                                      | 35-44y        | 1.26      | 0.97            | 1.63            | 0          |
|                                                      | 45-54         | 1.16      | 0.83            | 1.62            | 62.52      |
|                                                      | 55-64         | 1.03      | 0.91            | 1.17            | 0          |
|                                                      | 75+           | 0.92      | 0.65            | 1.30            | 35.17      |
| <GCSE/equivalent vs<br>Higher<br>education/Degree    | Overall       | 1.05      | 0.91            | 1.21            | 53.17      |
|                                                      | Not shielding | 1.02      | 0.88            | 1.19            | 46.14      |
|                                                      | Shielding     | 0.87      | 0.68            | 1.11            | 0          |
|                                                      | 16-24y        | 0.77      | 0.47            | 1.28            | 11.51      |
|                                                      | 25-34y        | 0.99      | 0.67            | 1.45            | 42.2       |
|                                                      | 35-44y        | 1.03      | 0.74            | 1.43            | 0          |
|                                                      | 45-54         | 1.48      | 1.08            | 2.04            | 34.96      |
|                                                      | 55-64         | 1.20      | 1.03            | 1.41            | 0          |
|                                                      | 75+           | 0.96      | 0.78            | 1.20            | 0          |
| <b>Occupational class</b>                            |               | <b>OR</b> | <b>Lower CI</b> | <b>Upper CI</b> | <b>I2%</b> |
| Intermediate vs<br>Managerial/Admin/P<br>rofessional | Overall       | 1.07      | 0.99            | 1.15            | 0          |
|                                                      | Not shielding | 1.07      | 0.98            | 1.16            | 0          |
|                                                      | Shielding     | 0.87      | 0.65            | 1.16            | 7.88       |
|                                                      | 16-24y        | 0.92      | 0.60            | 1.41            | 0          |
|                                                      | 25-34y        | 1.04      | 0.84            | 1.29            | 10.79      |
|                                                      | 35-44y        | 1.28      | 0.92            | 1.78            | 46.81      |
|                                                      | 45-54         | 1.12      | 0.94            | 1.33            | 0          |
|                                                      | 55-64         | 1.01      | 0.86            | 1.19            | 22.02      |

|                                                            |               |         |      |      |       |
|------------------------------------------------------------|---------------|---------|------|------|-------|
|                                                            | 75+           | 1.00    | 0.76 | 1.33 | 0     |
|                                                            | Overall       | 1.17    | 1.08 | 1.27 | 0     |
|                                                            | Not shielding | 1.18    | 1.07 | 1.29 | 0     |
|                                                            | Shielding     | 0.93    | 0.71 | 1.21 | 0     |
| Manual/Routine vs<br>Managerial/Admin/P<br>rofessional     | 16-24y        | 1.15    | 0.77 | 1.71 | 0     |
|                                                            | 25-34y        | 1.11    | 0.80 | 1.55 | 50.55 |
|                                                            | 35-44y        | 1.24    | 0.95 | 1.63 | 0     |
|                                                            | 45-54         | 1.08    | 0.90 | 1.30 | 0     |
|                                                            | 55-64         | 1.16    | 1.00 | 1.35 | 0     |
|                                                            | 75+           | 1.27    | 0.96 | 1.67 | 0     |
|                                                            |               | Overall | 1.51 | 1.12 | 2.04  |
|                                                            | Not shielding | 1.48    | 1.04 | 2.09 | 83.37 |
|                                                            | Shielding     | 0.89    | 0.39 | 2.07 | 78.87 |
| Other social class vs<br>Managerial/Admin/P<br>rofessional | 16-24y        | 1.02    | 0.46 | 2.26 | 58.35 |
|                                                            | 25-34y        | 1.85    | 1.29 | 2.64 | 0     |
|                                                            | 35-44y        | 1.44    | 0.55 | 3.80 | 68.27 |
|                                                            | 45-54         | 2.05    | 0.98 | 4.29 | 85.15 |
|                                                            | 55-64         | 1.65    | 1.21 | 2.27 | 60.63 |
|                                                            | 75+           | 1.02    | 0.62 | 1.69 | 0     |

Adjusted for sex, age, and ethnicity (where available)

Empty I<sup>2</sup>% column indicates only one study included

\*Binary variable including Black, East Asian, Mixed, South Asian, and other ethnicity in 'non-White'

## Any healthcare disruption

Sex  
Unadjusted

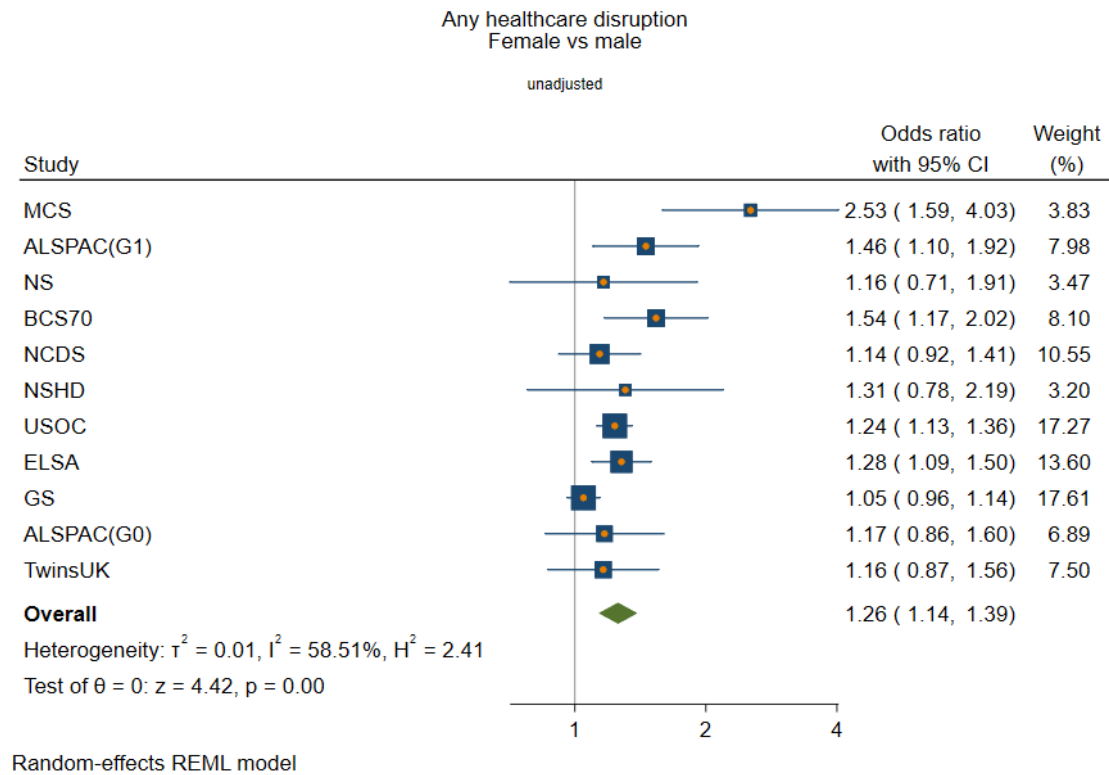

Basic adjustment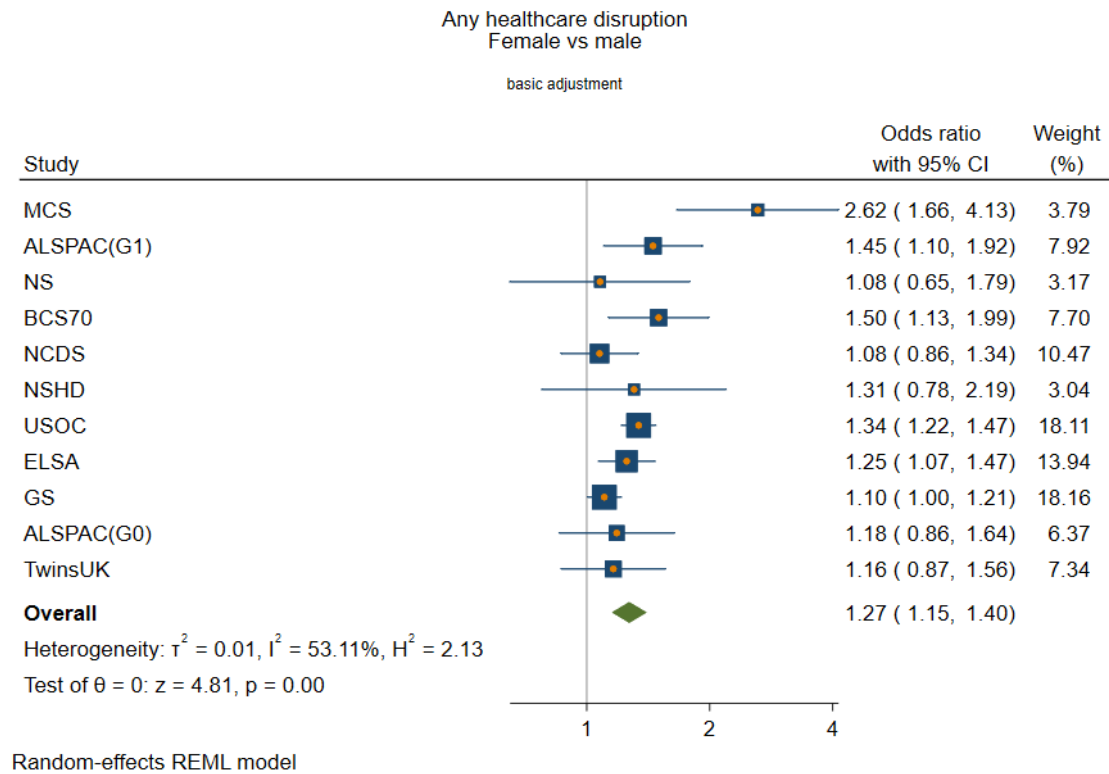

Full adjustment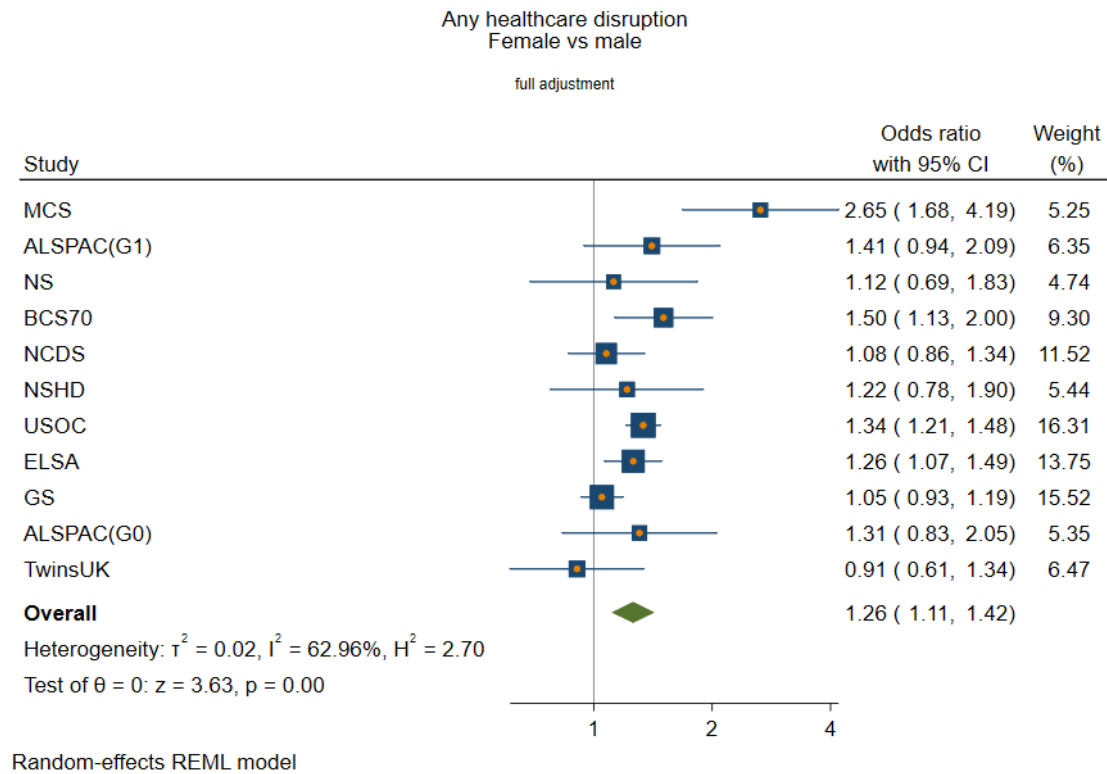



*Occupational class*  
Unadjusted

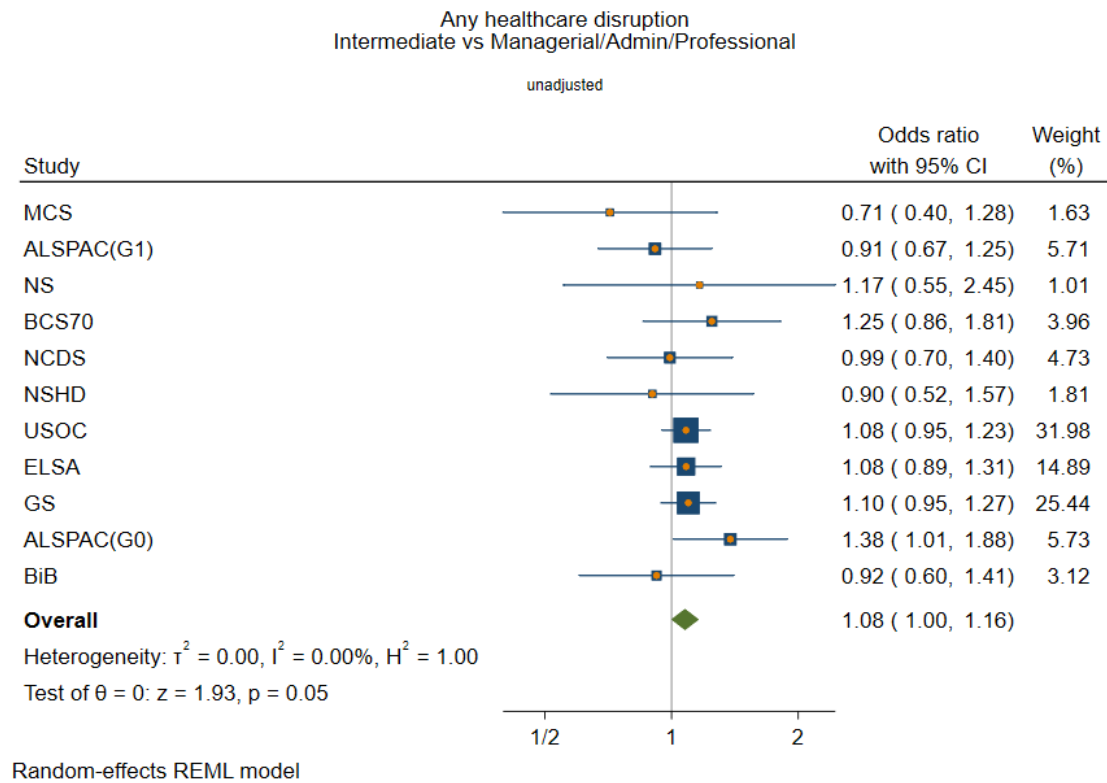

Any healthcare disruption  
Manual/Routine vs Managerial/Admin/Professional

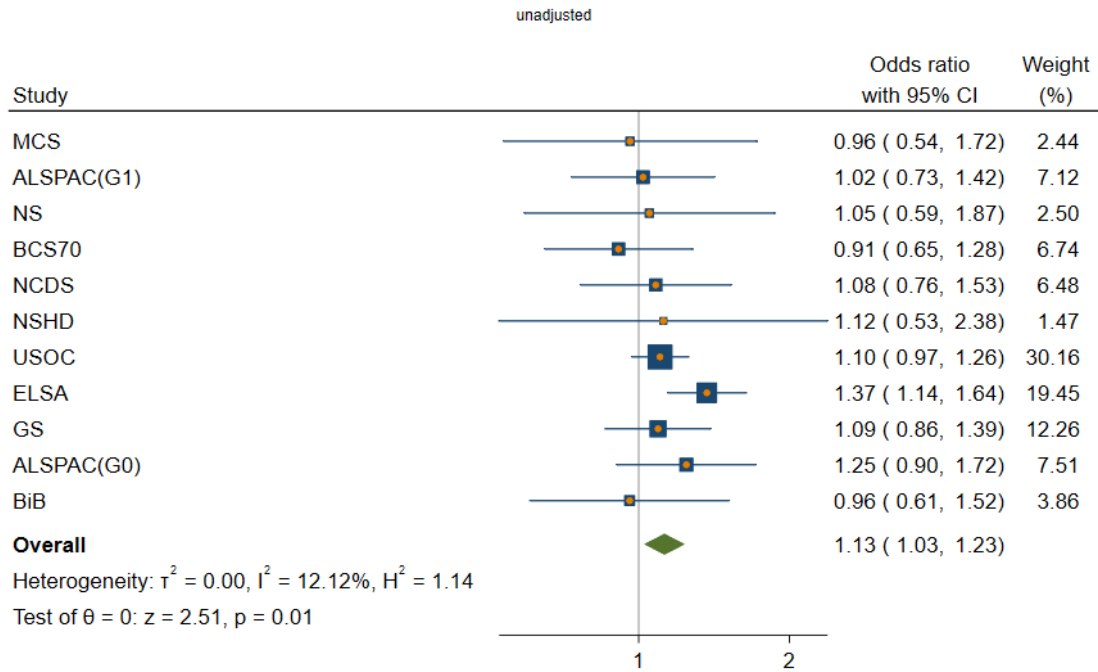

Random-effects REML model

Any healthcare disruption  
Other social class vs Managerial/Admin/Professional

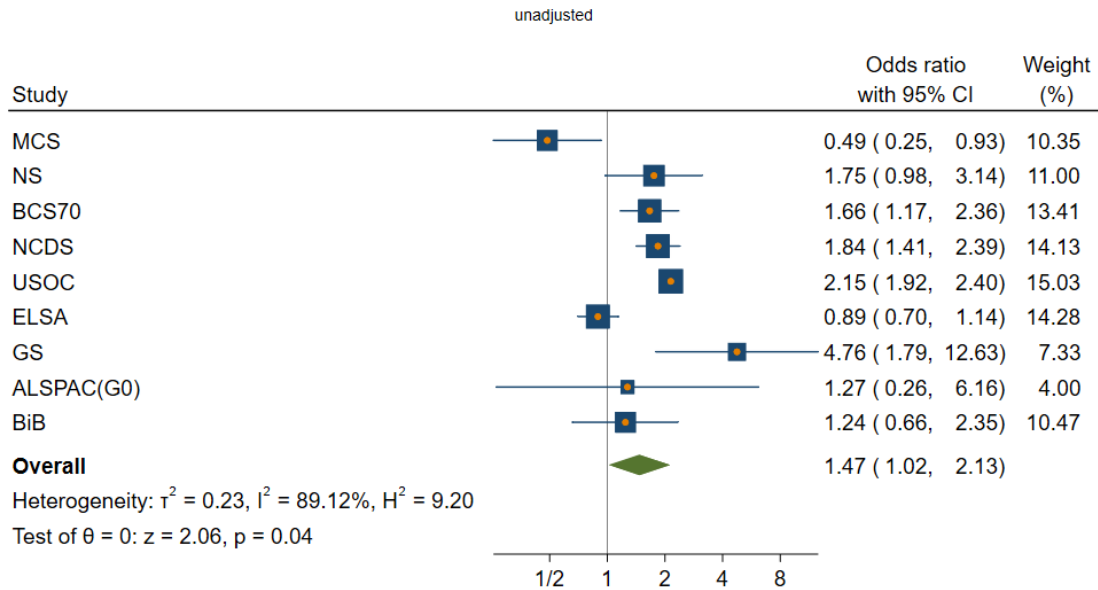

Random-effects REML model

Basic adjustment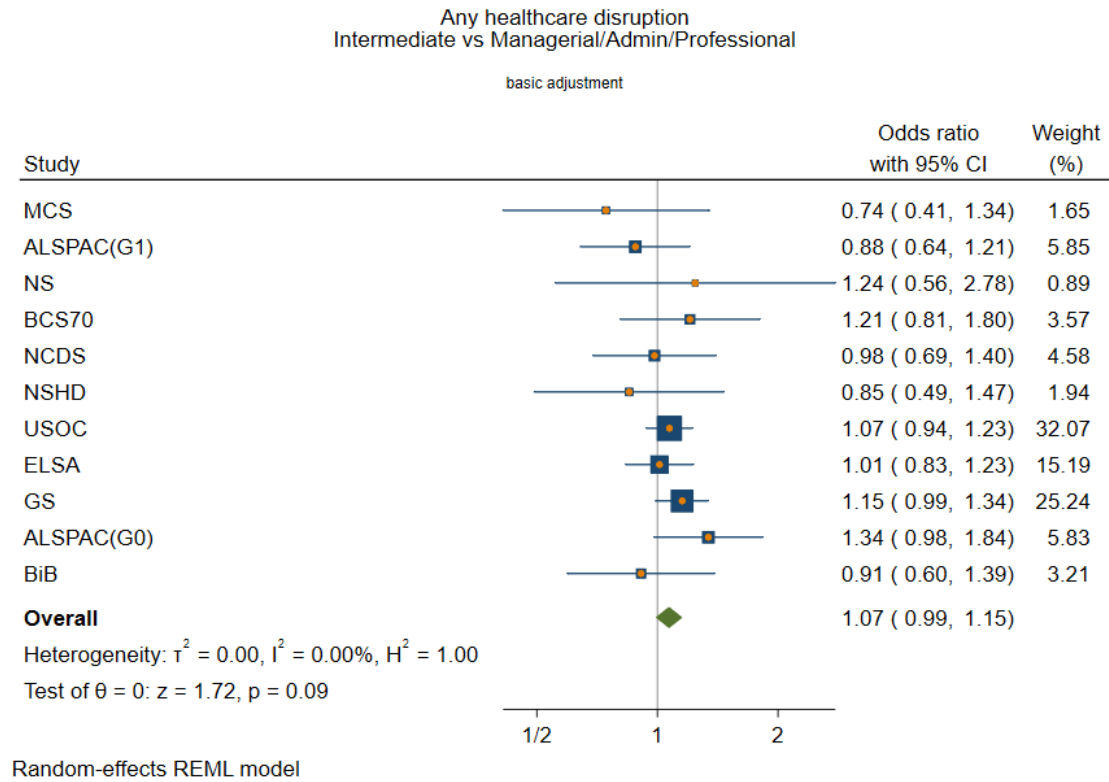

Any healthcare disruption  
Manual/Routine vs Managerial/Admin/Professional

basic adjustment

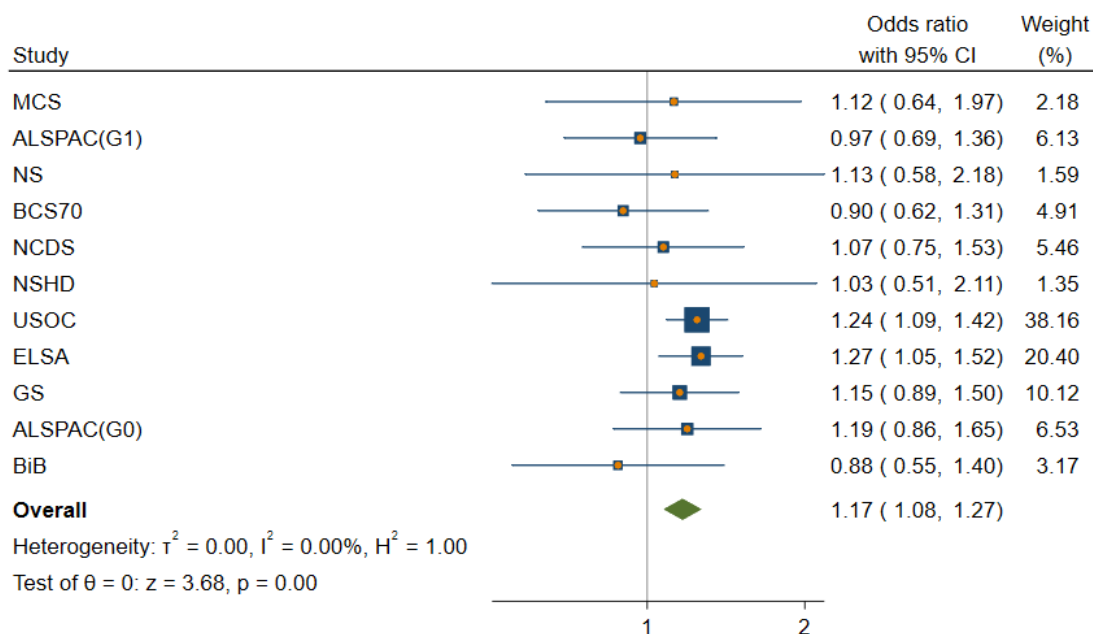

Random-effects REML model

Any healthcare disruption  
Other social class vs Managerial/Admin/Professional

basic adjustment

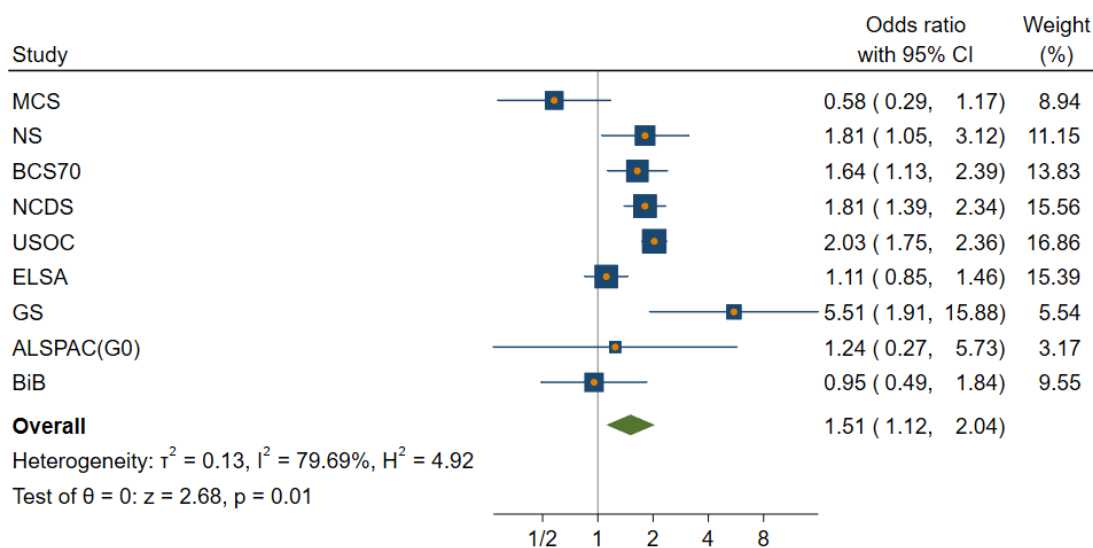

Random-effects REML model

Full adjustment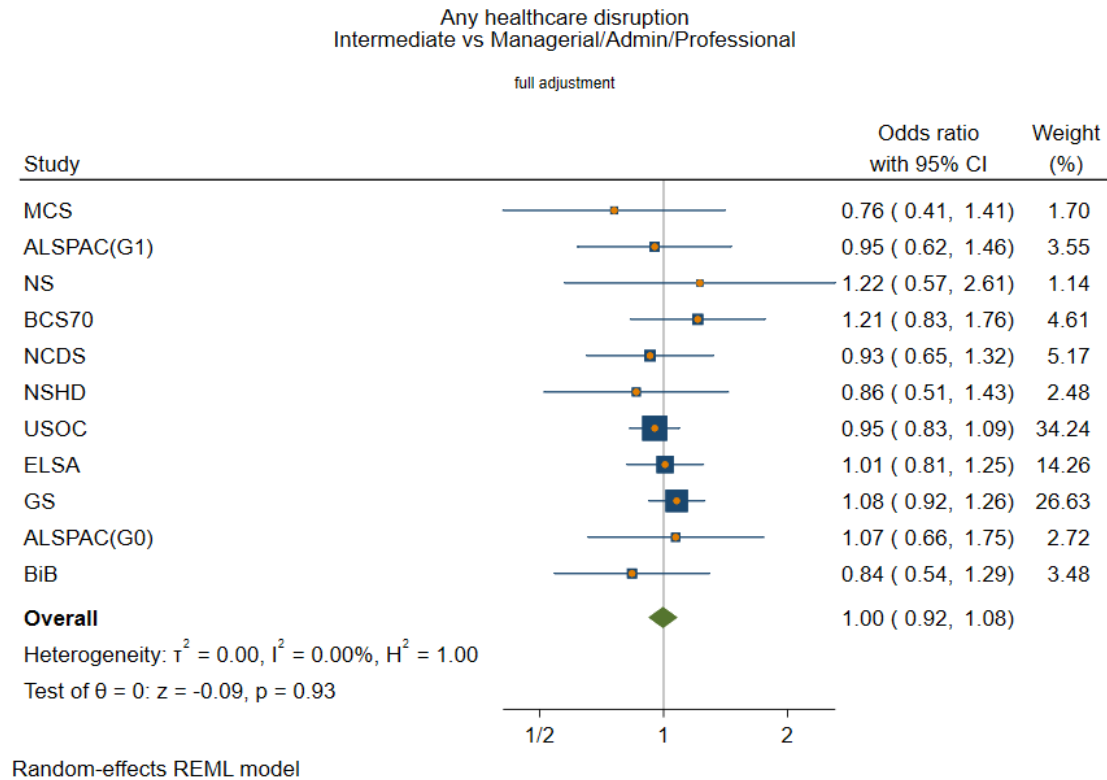

Any healthcare disruption  
Manual/Routine vs Managerial/Admin/Professional

full adjustment

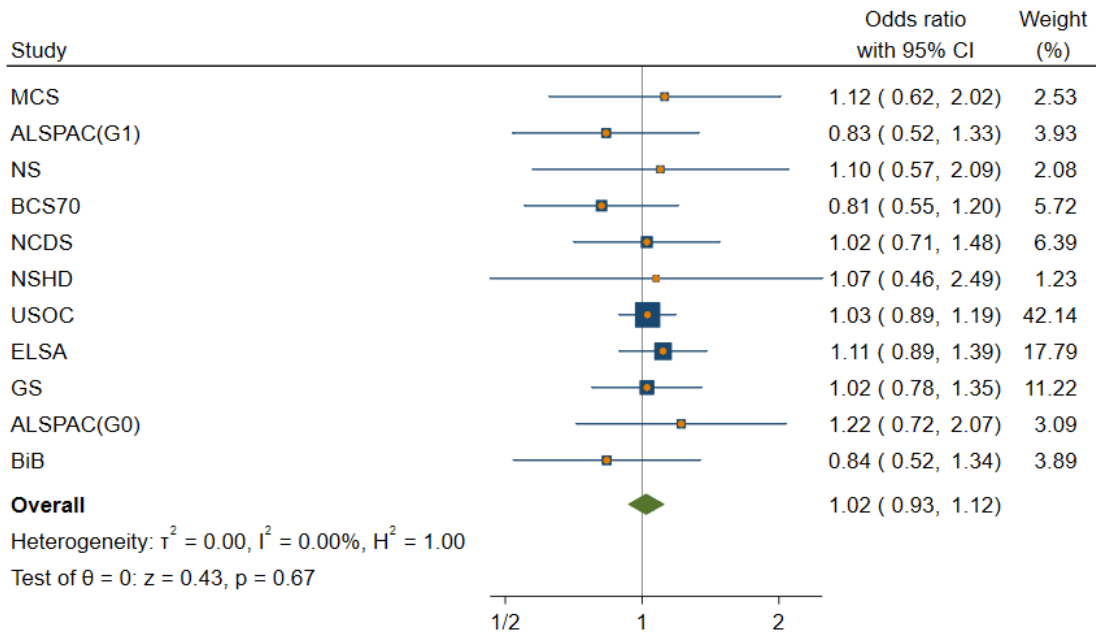

Random-effects REML model

Any healthcare disruption  
Other social class vs Managerial/Admin/Professional

full adjustment

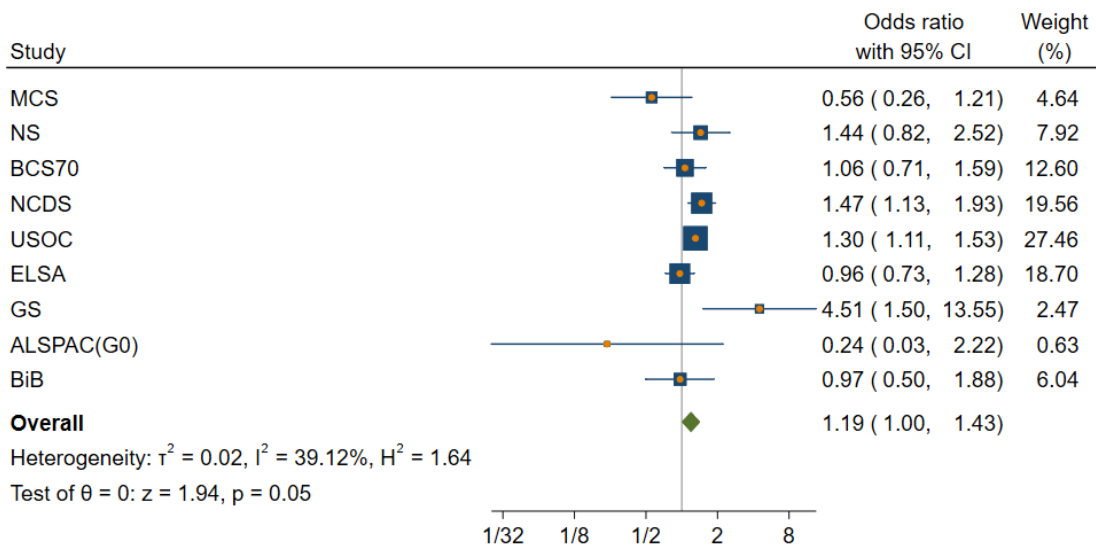

Random-effects REML model

*Education*  
Unadjusted

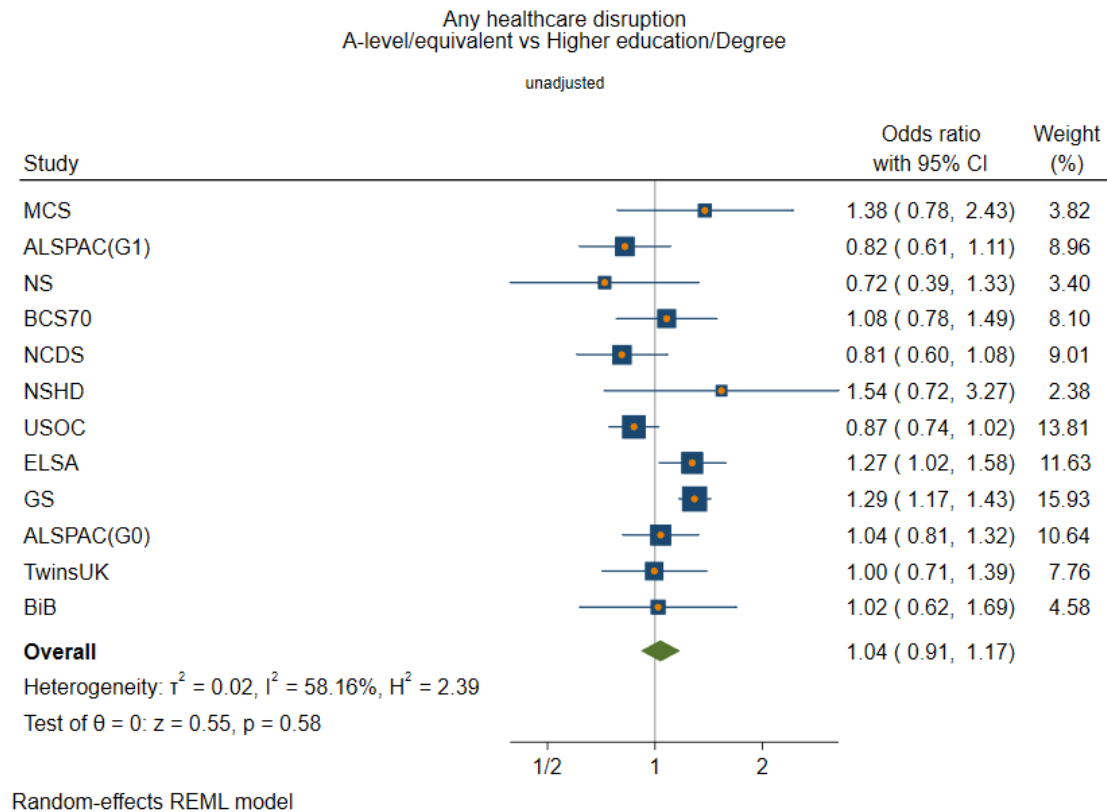

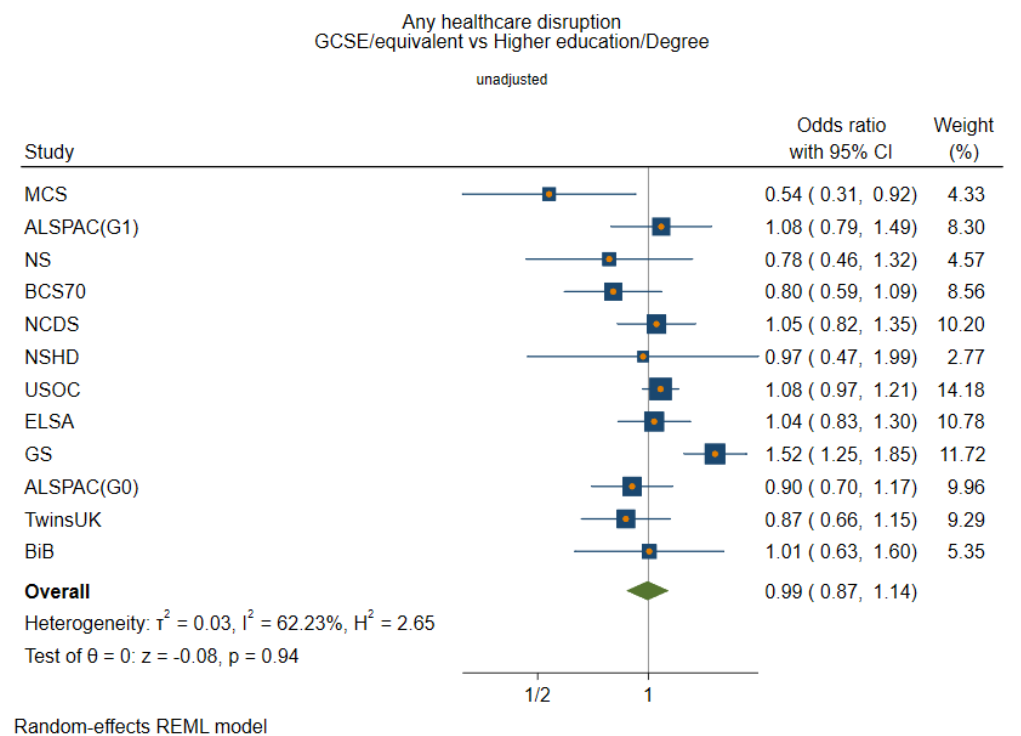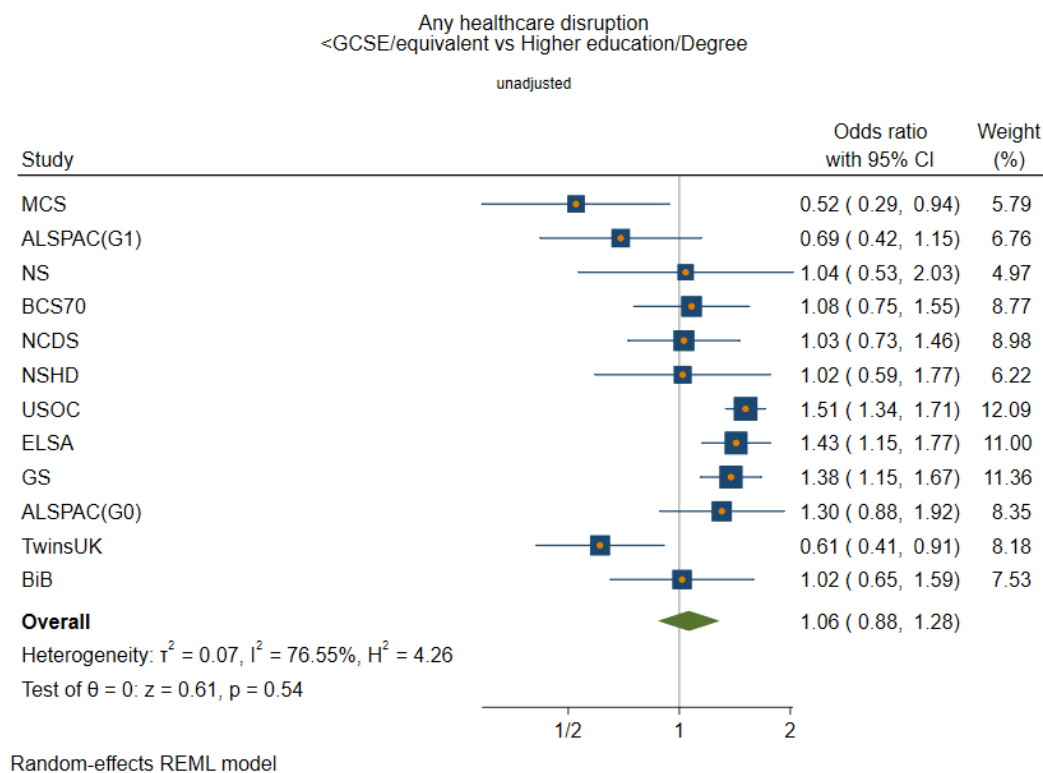



Basic adjustment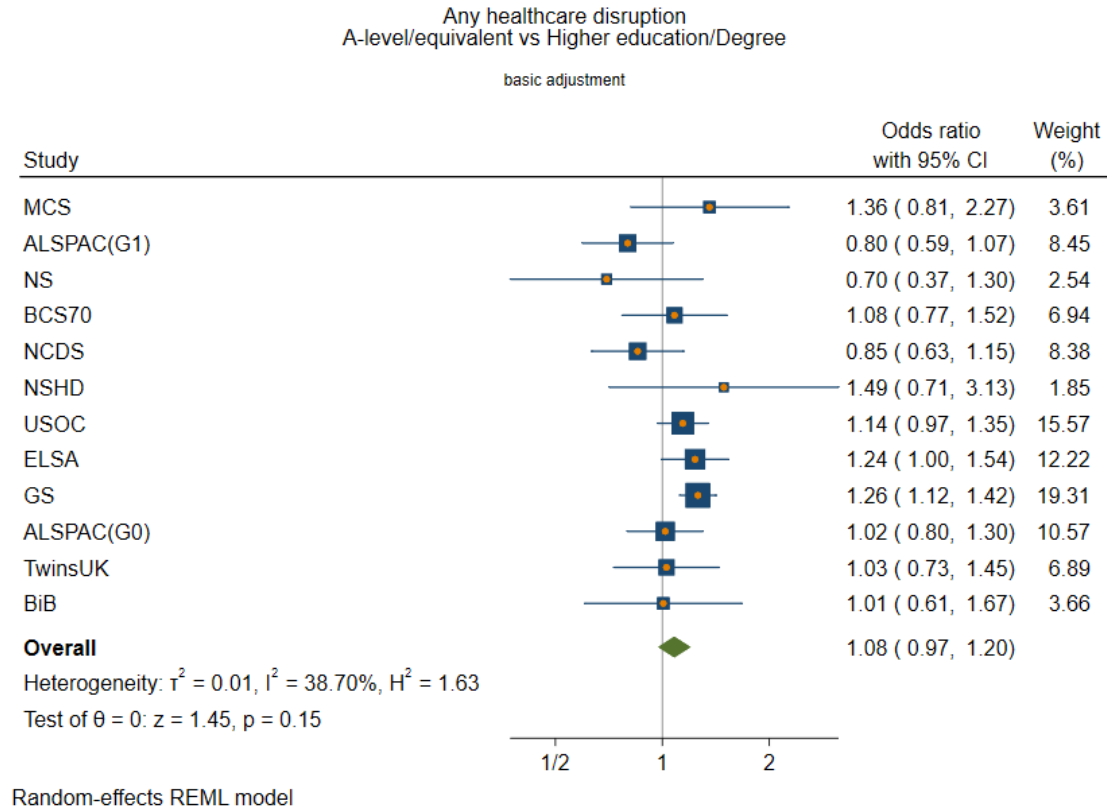

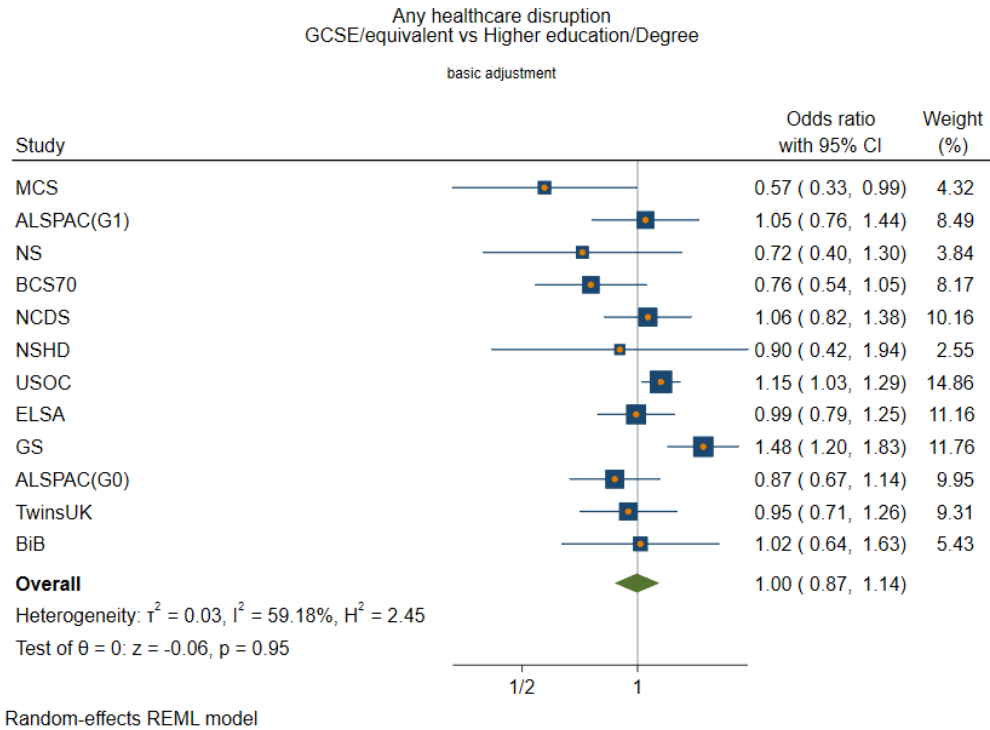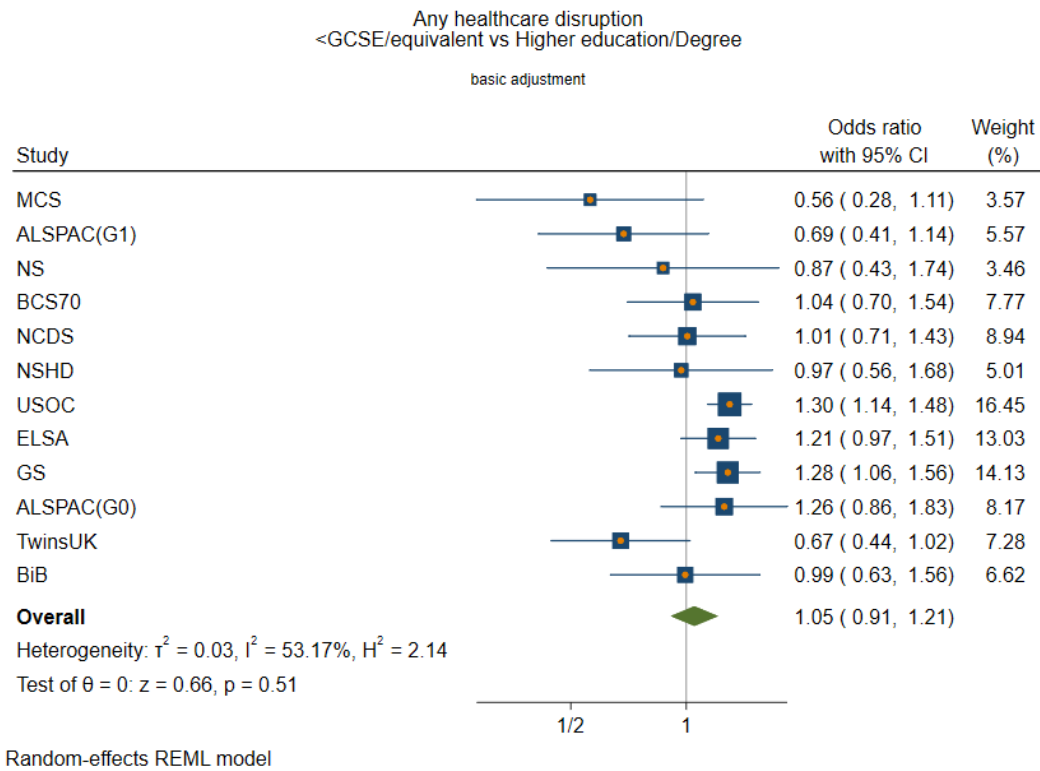

Full adjustment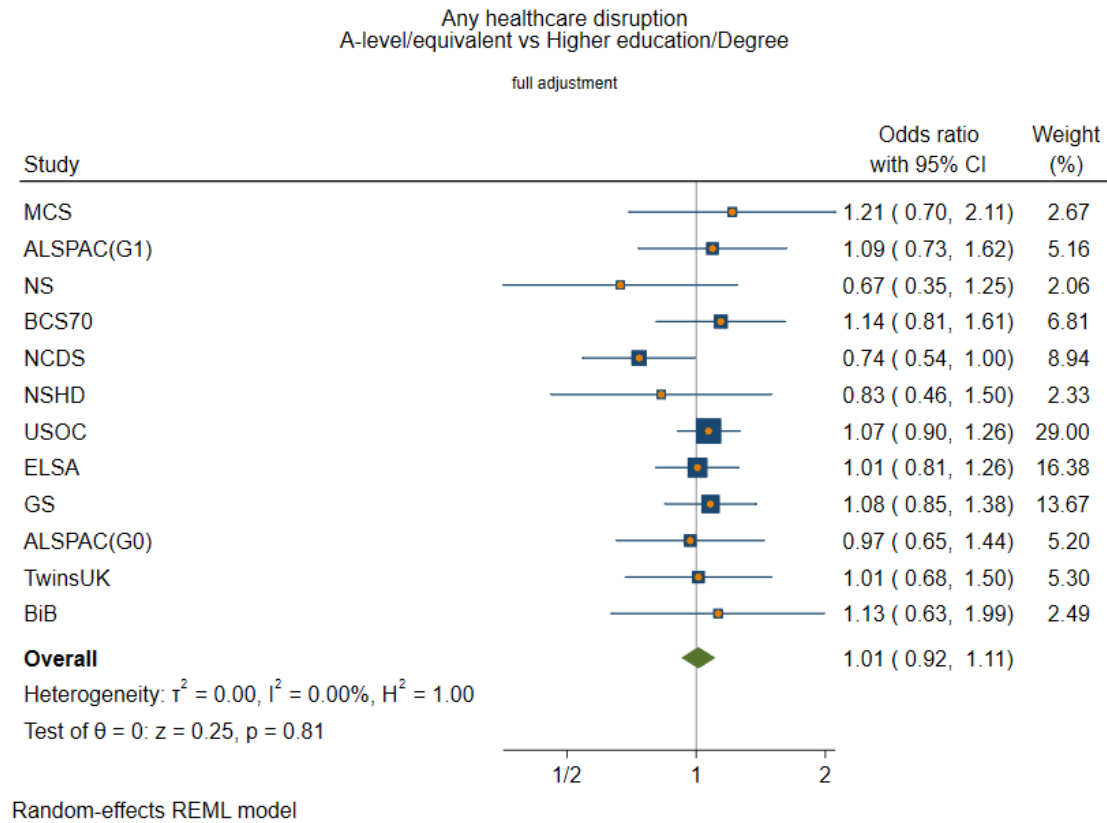

Any healthcare disruption  
GCSE/equivalent vs Higher education/Degree  
full adjustment

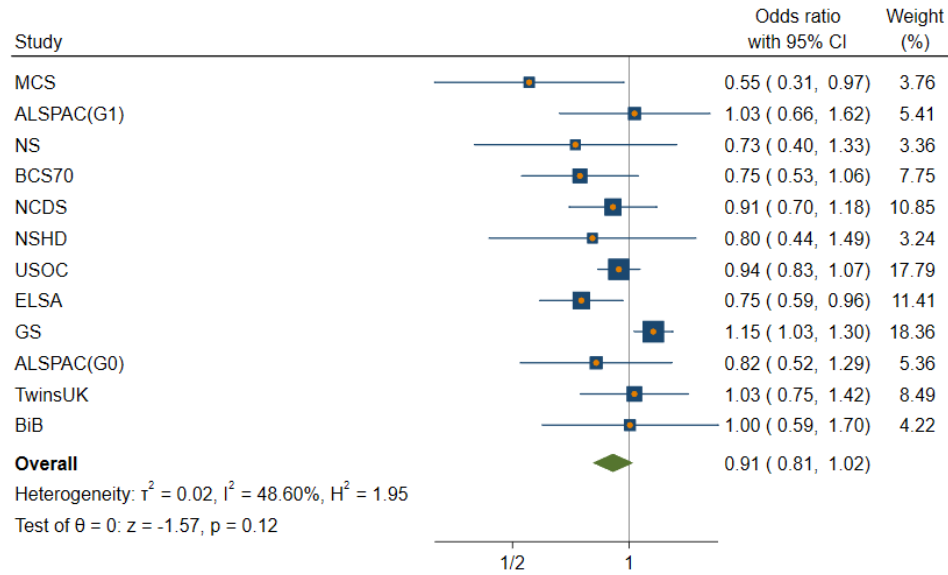

Random-effects REML model

Any healthcare disruption  
<GCSE/equivalent vs Higher education/Degree  
full adjustment

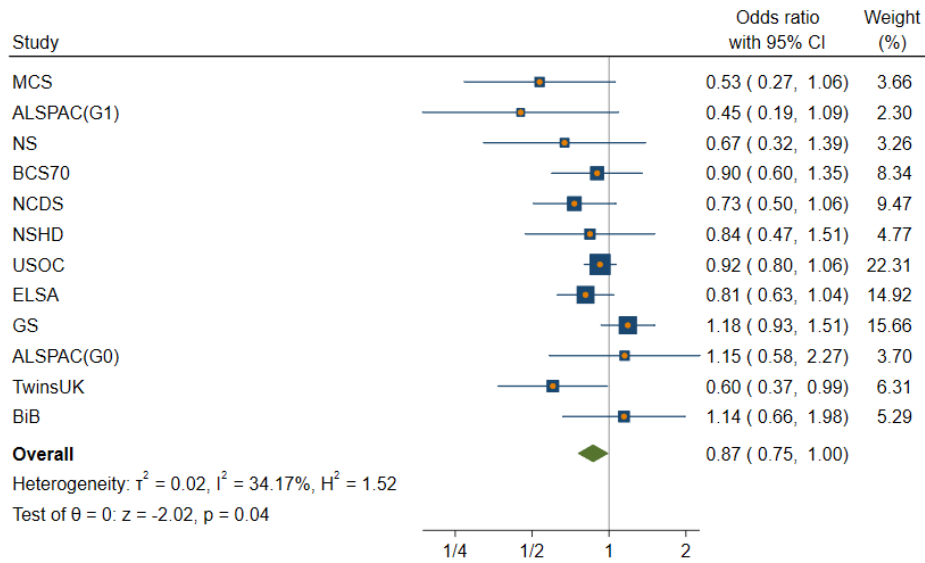

Random-effects REML model

Age  
Unadjusted

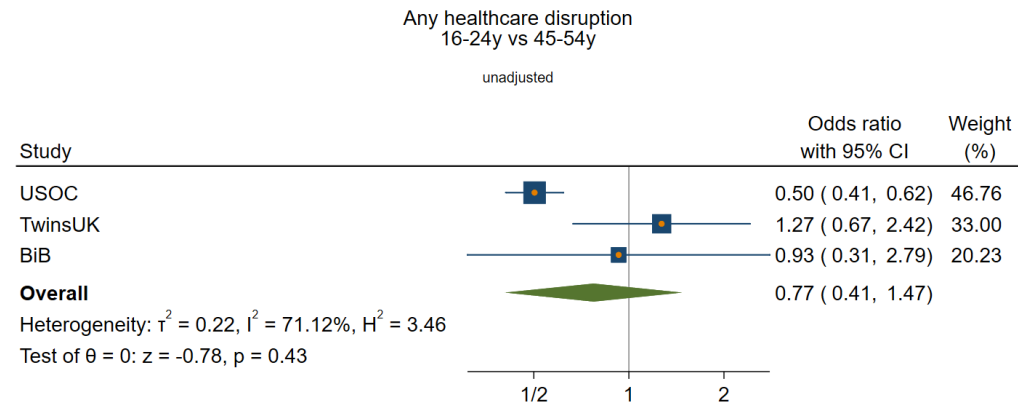

Random-effects REML model

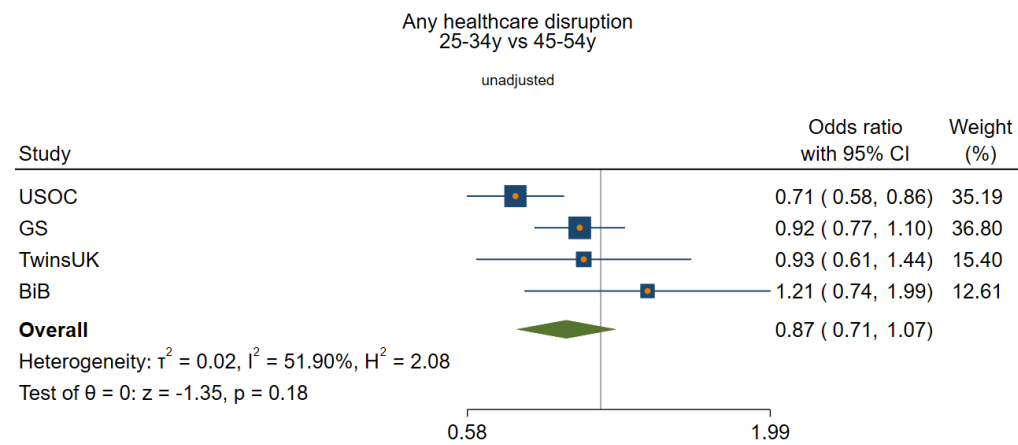

Random-effects REML model

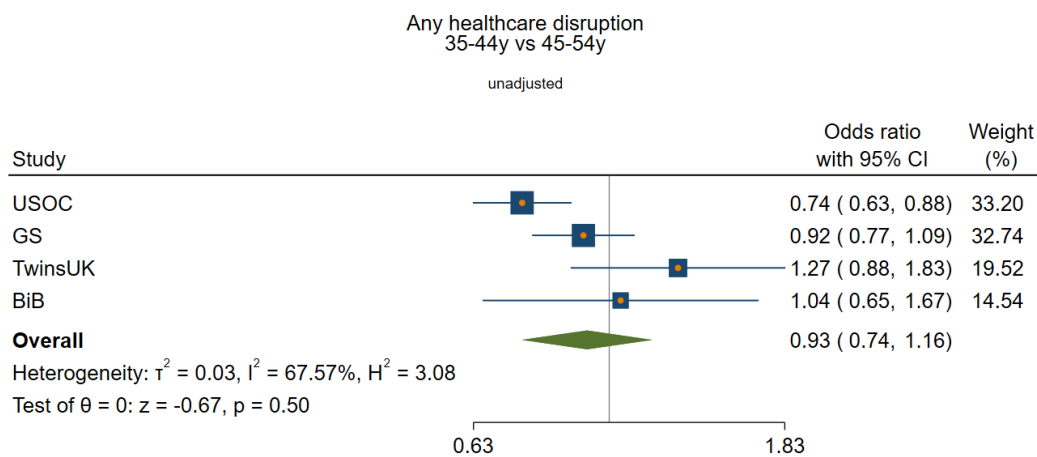

Random-effects REML model

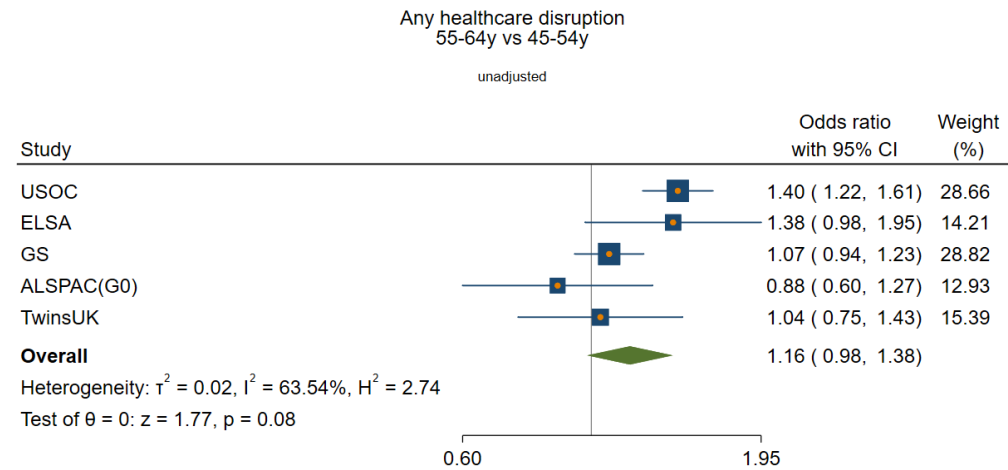

Random-effects REML model

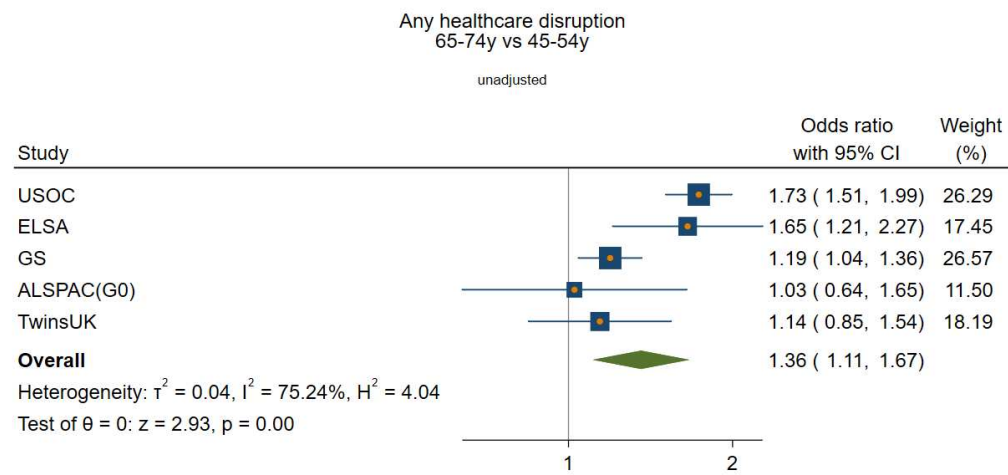

Random-effects REML model

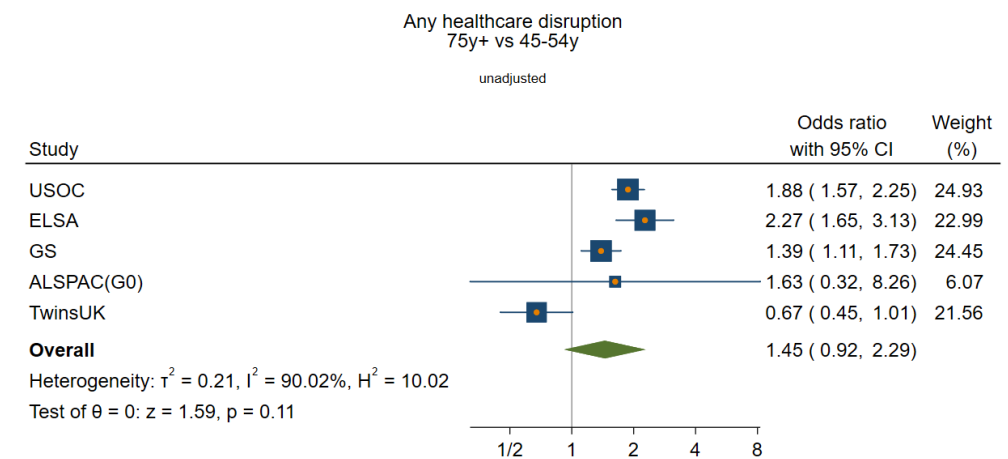

Random-effects REML model

Basic adjustment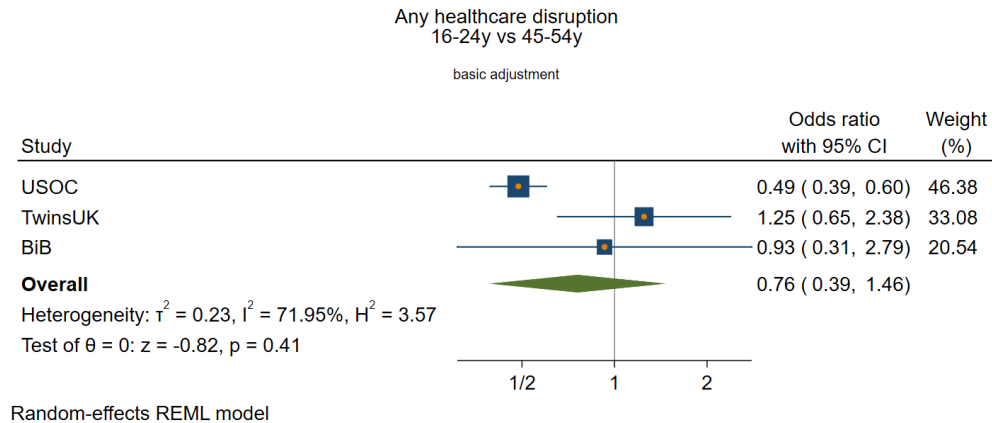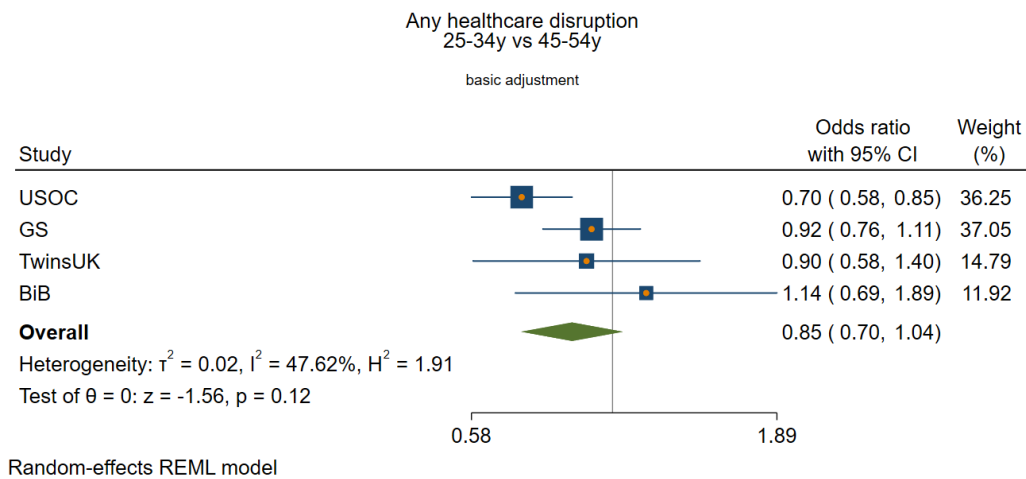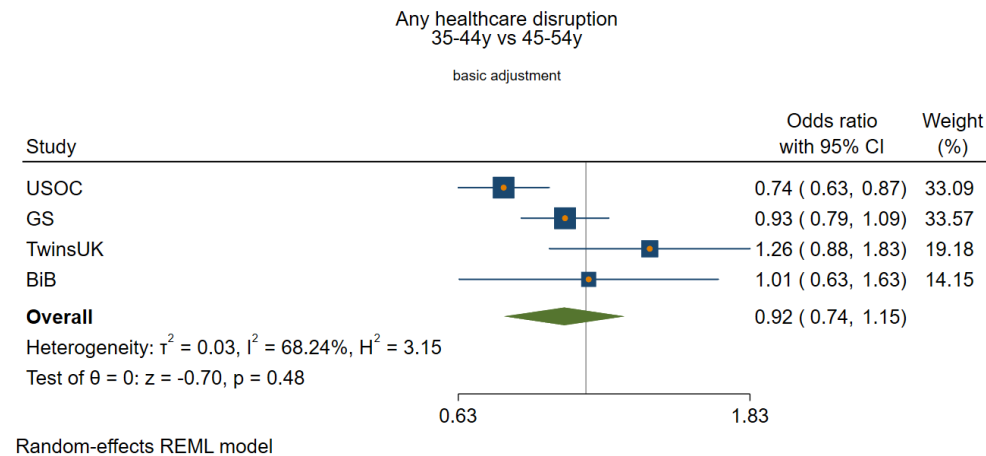

Any healthcare disruption  
55-64y vs 45-54y

basic adjustment

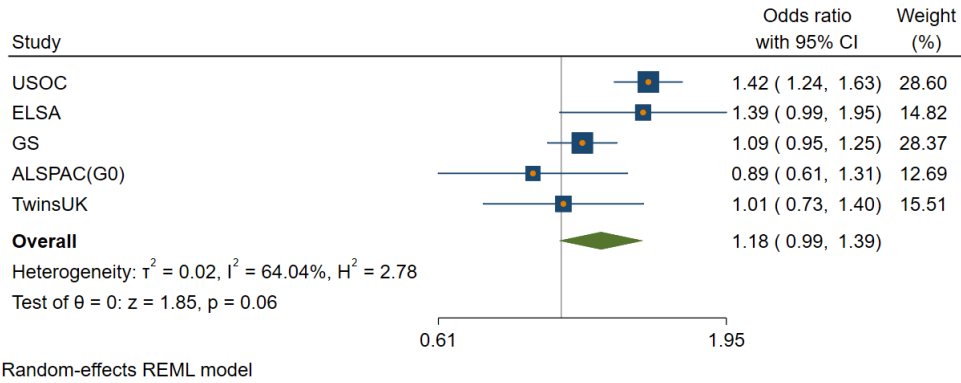

Any healthcare disruption  
65-74y vs 45-54y

basic adjustment

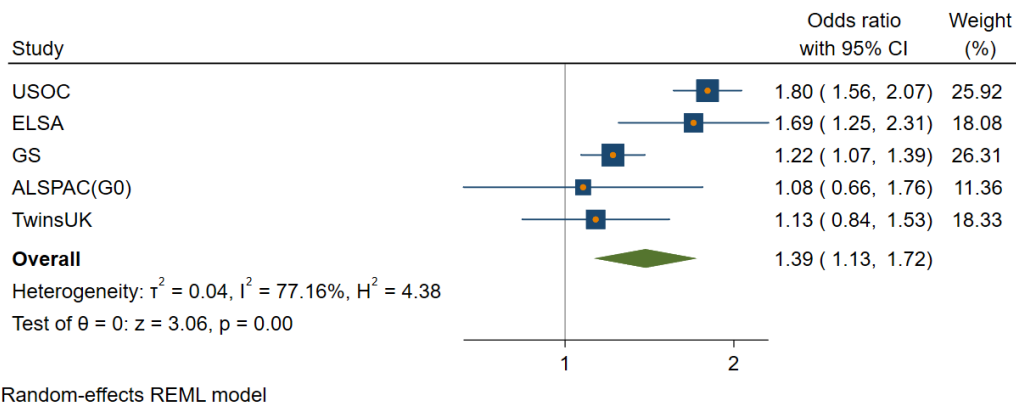

Any healthcare disruption  
75y+ vs 45-54y

basic adjustment

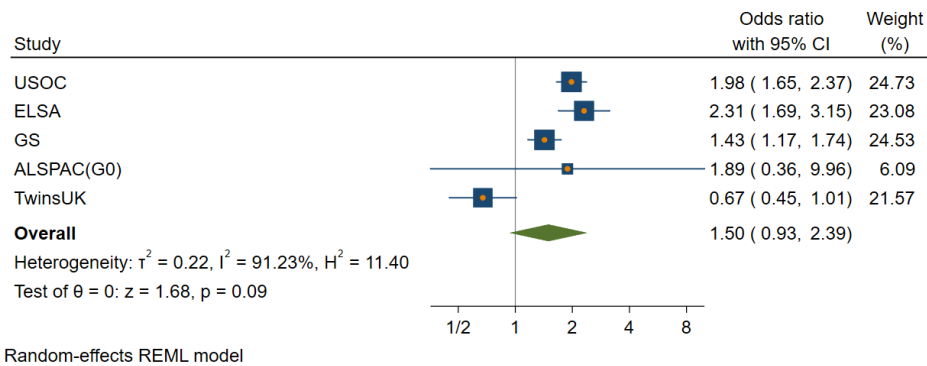



Full adjustment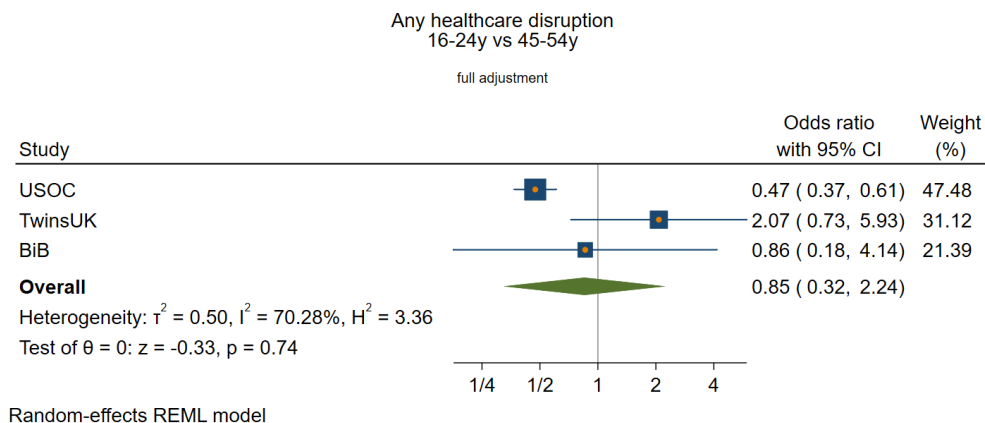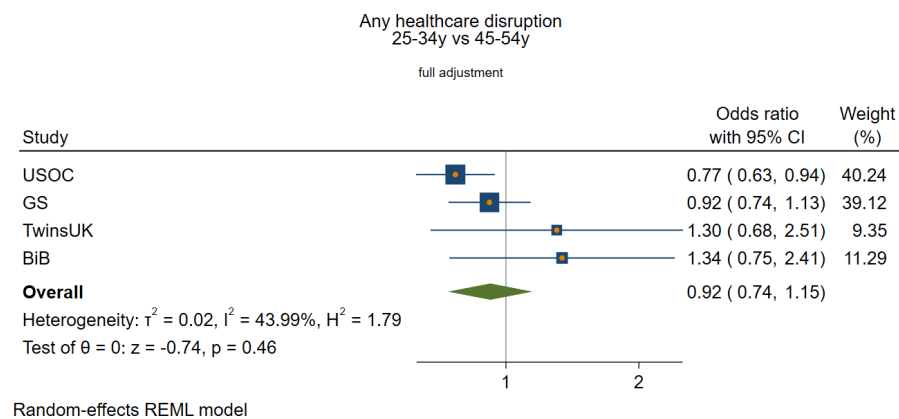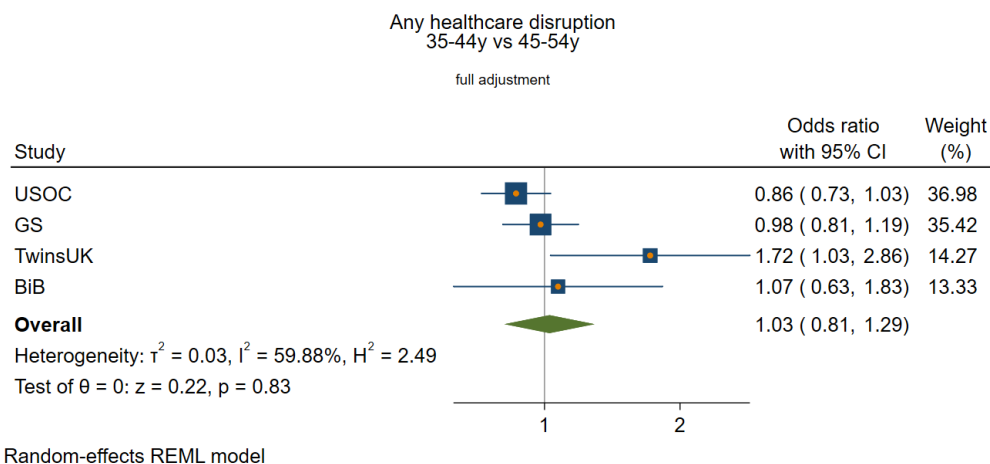

Any healthcare disruption  
55-64y vs 45-54y

full adjustment

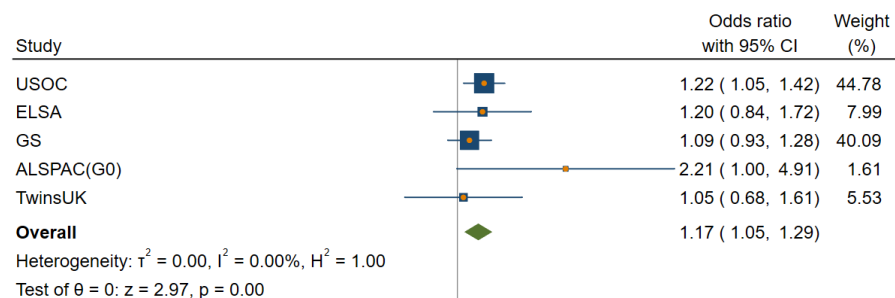

Random-effects REML model

Any healthcare disruption  
65-74y vs 45-54y

full adjustment

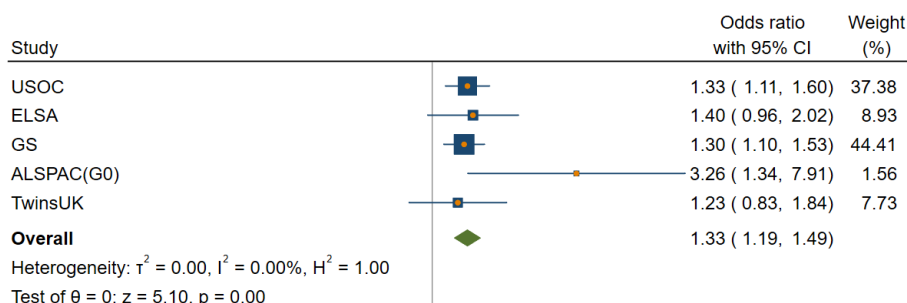

Random-effects REML model

Any healthcare disruption  
75y+ vs 45-54y

full adjustment

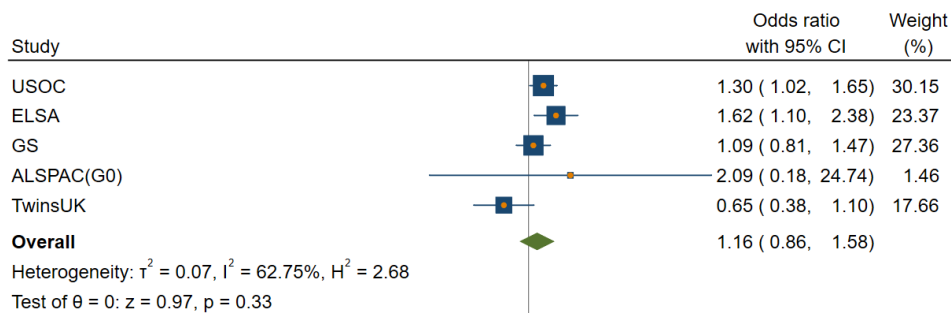

Random-effects REML model

*Ethnicity*  
Unadjusted

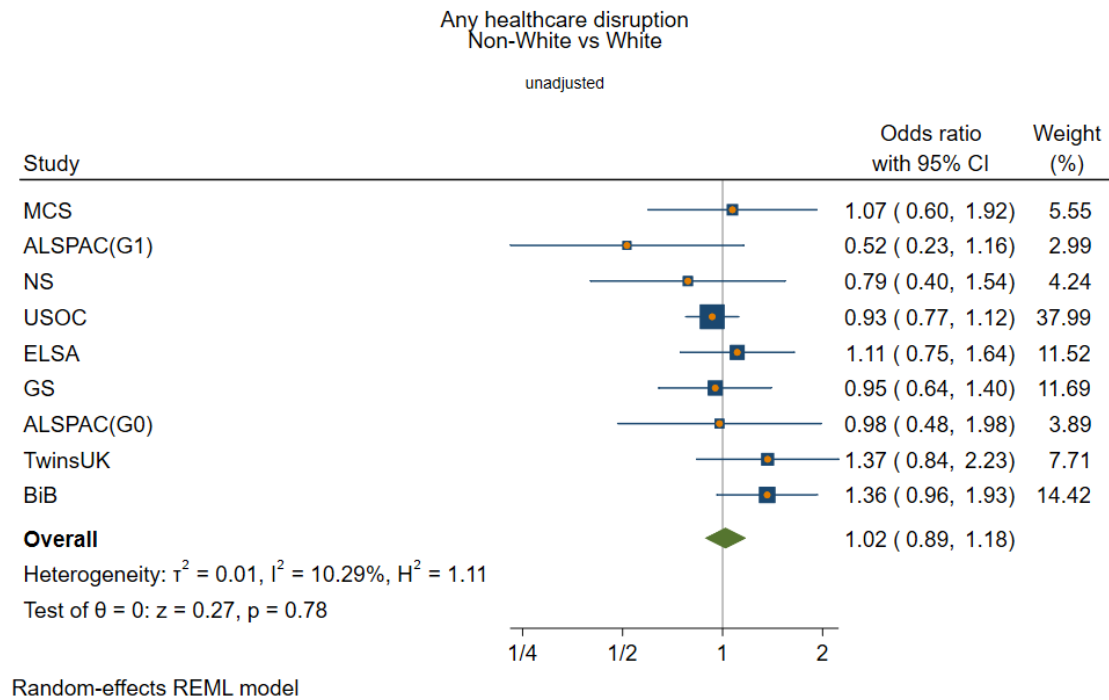

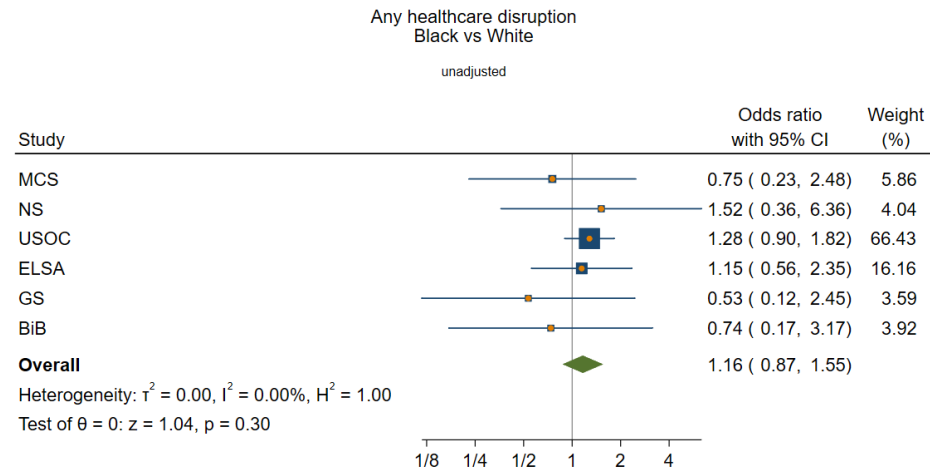

Random-effects REML model

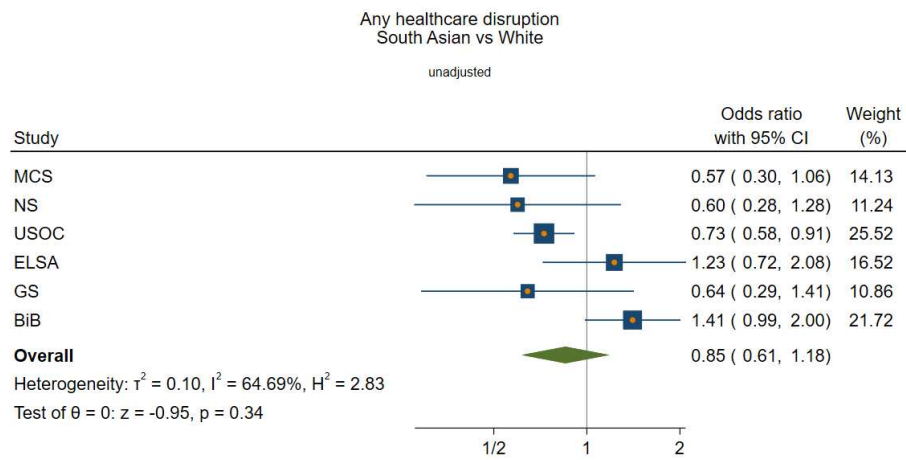

Random-effects REML model

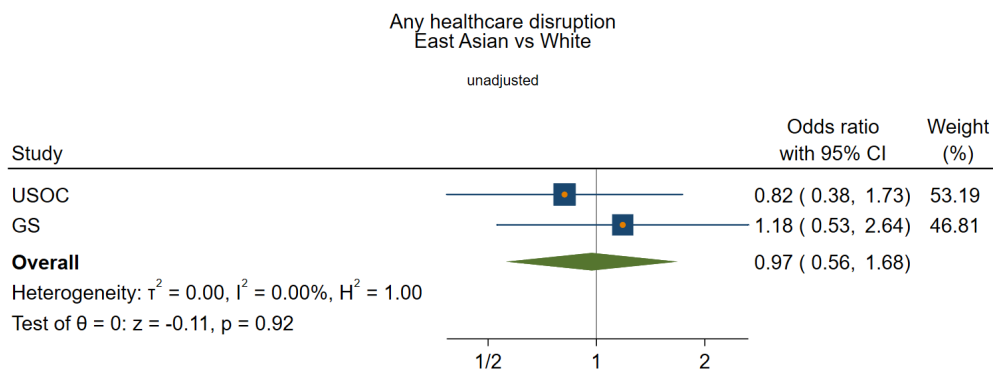

Random-effects REML model

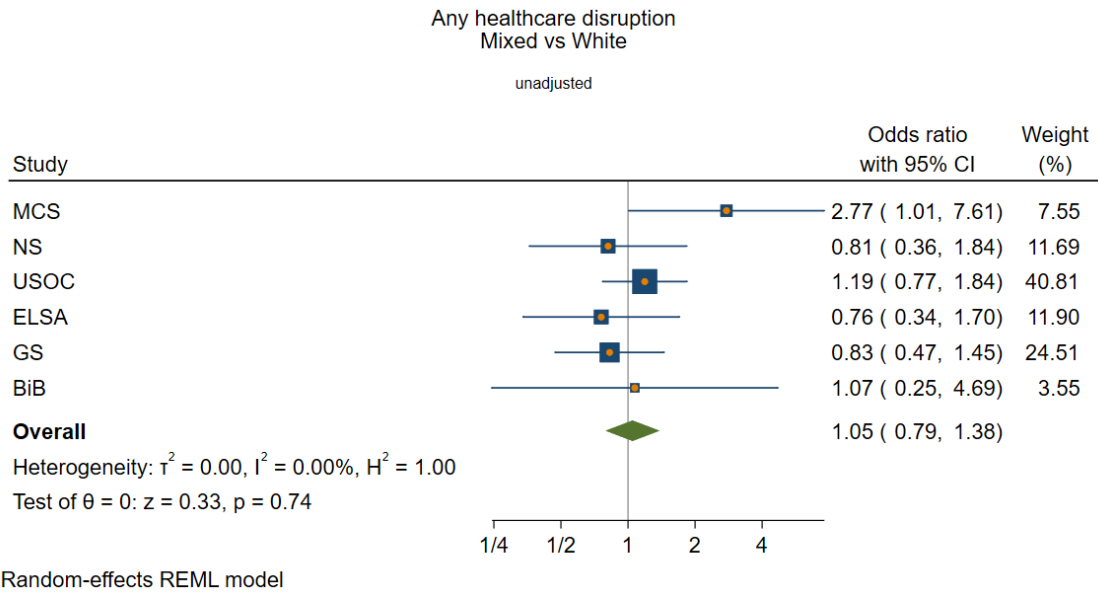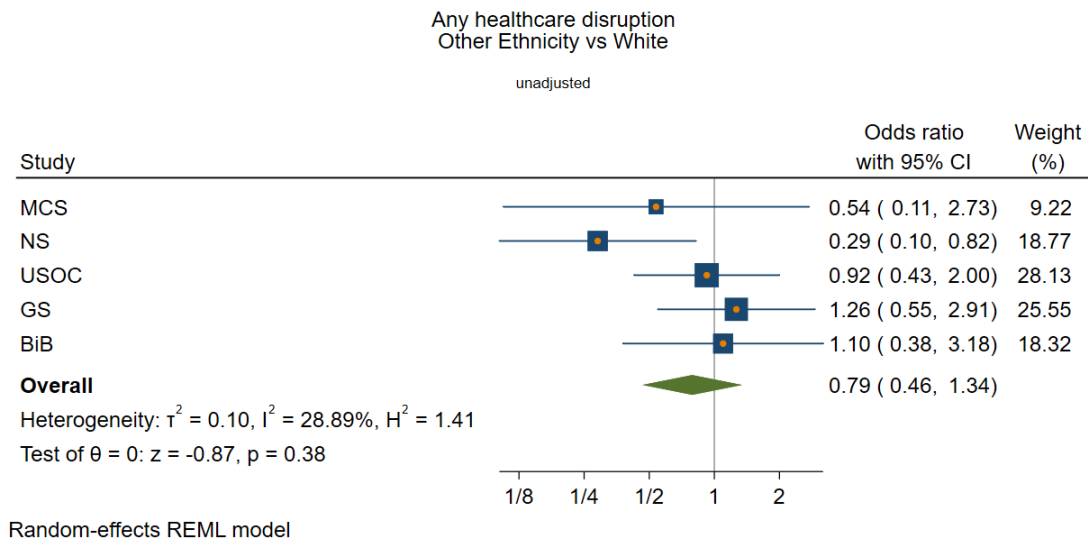

Basic adjustment

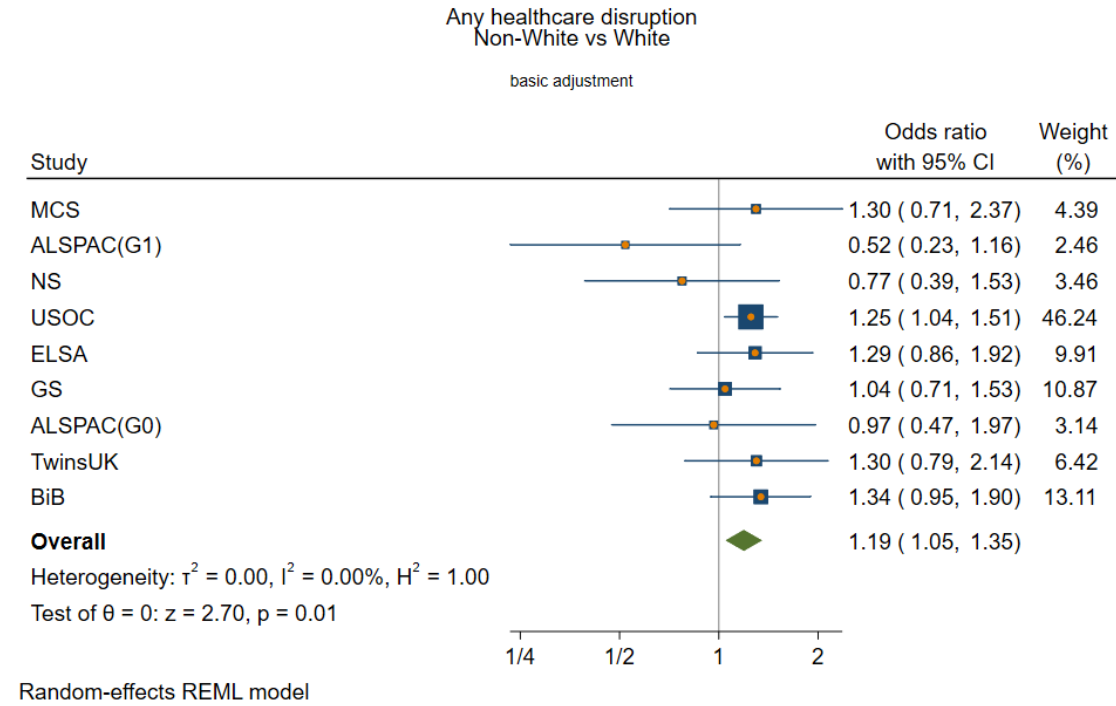

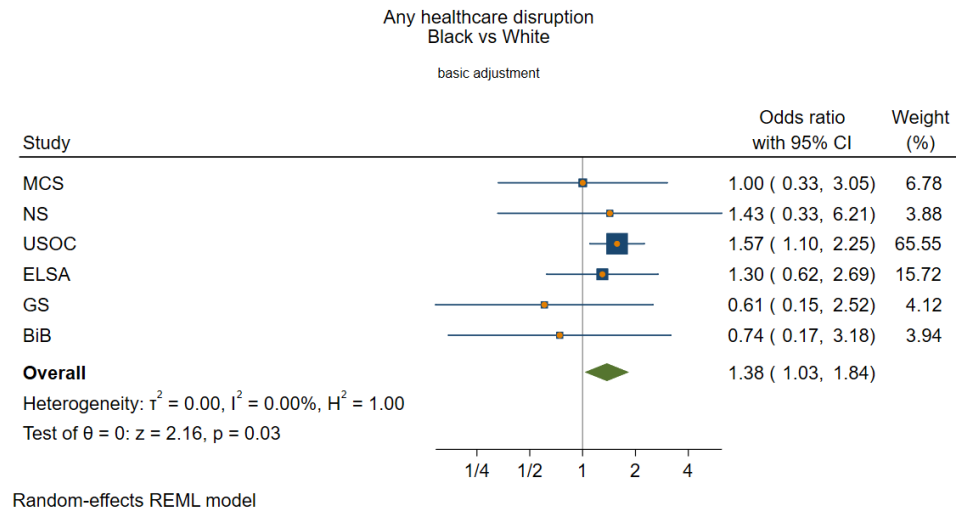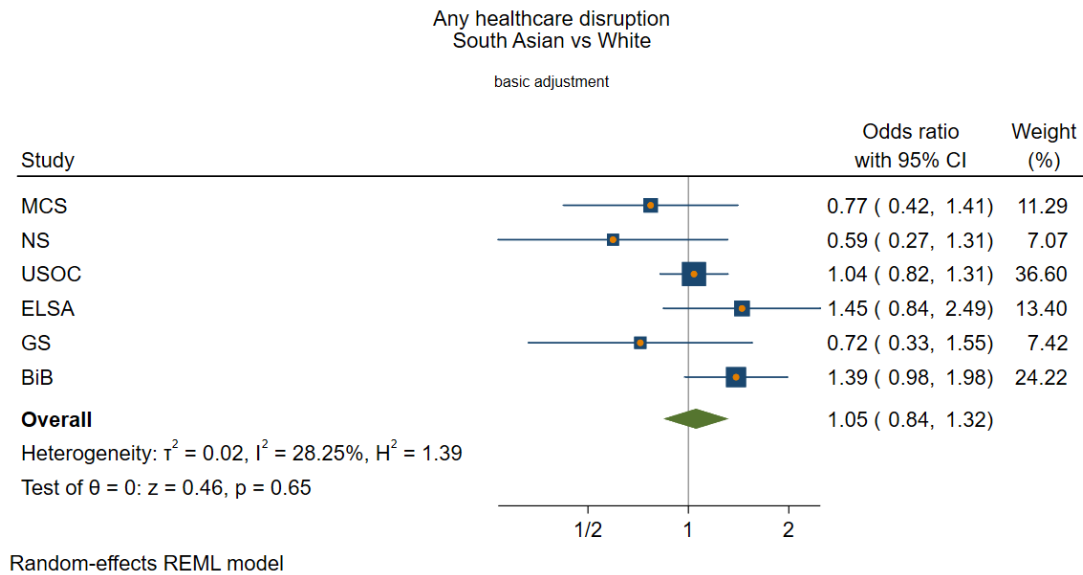

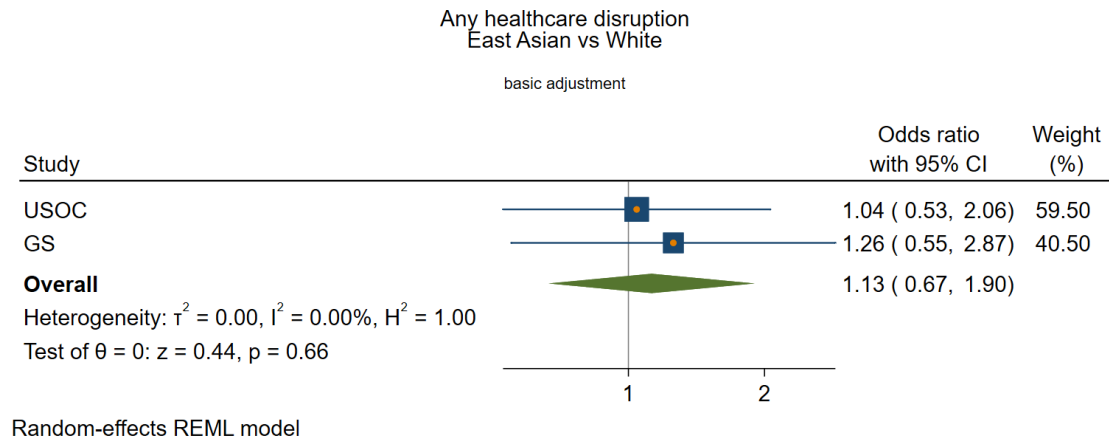



Any healthcare disruption  
Mixed vs White

basic adjustment

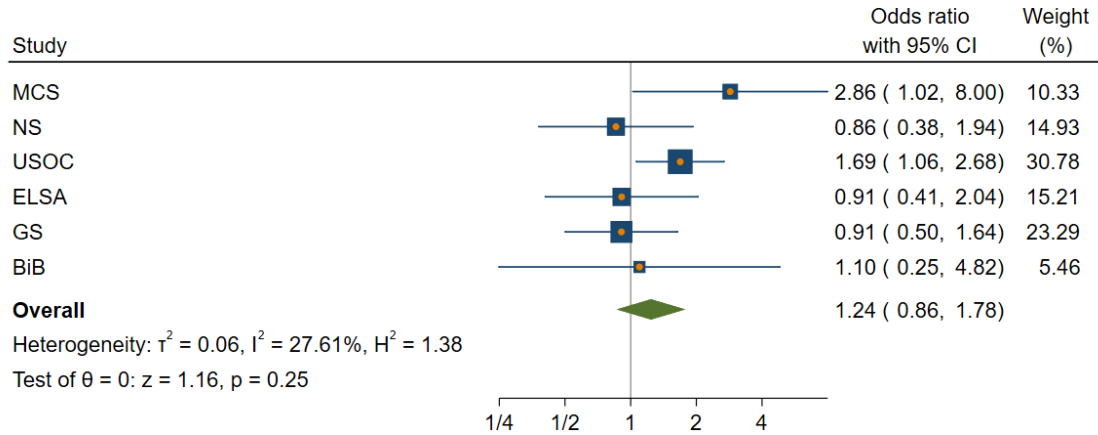

Random-effects REML model

Any healthcare disruption  
Other Ethnicity vs White

basic adjustment

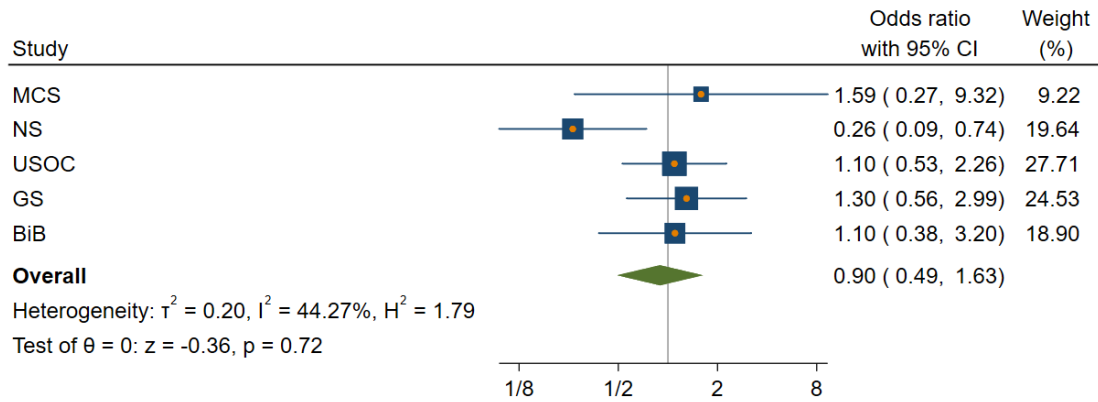

Random-effects REML model

Full adjustment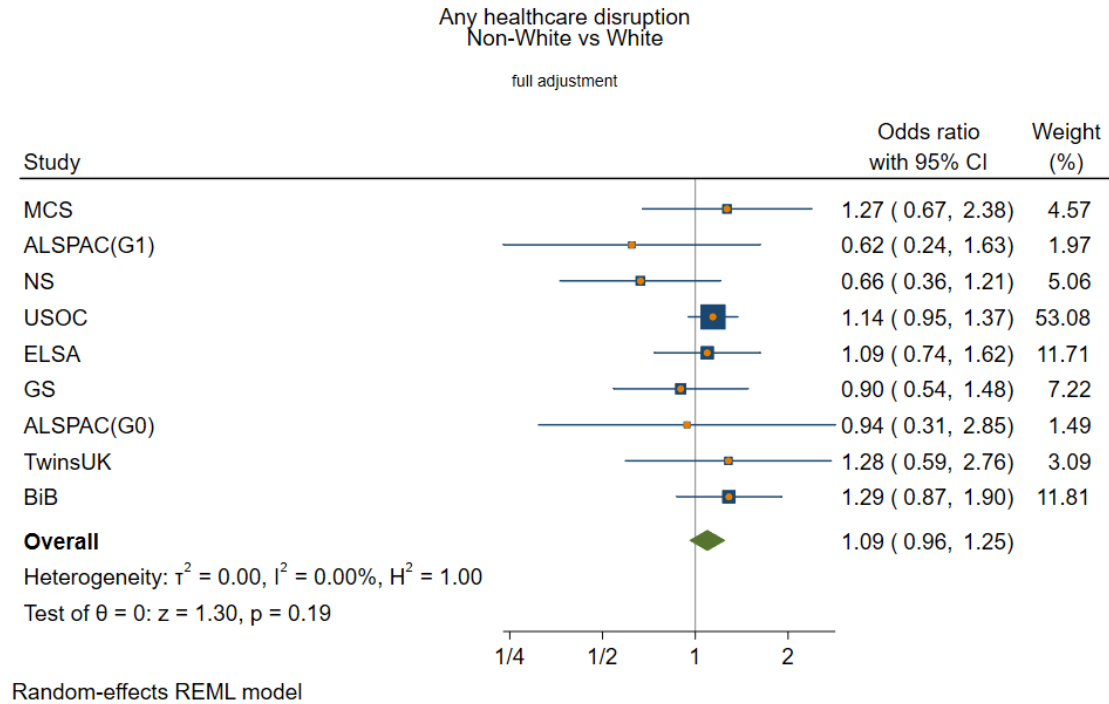

Any healthcare disruption  
Black vs White

full adjustment

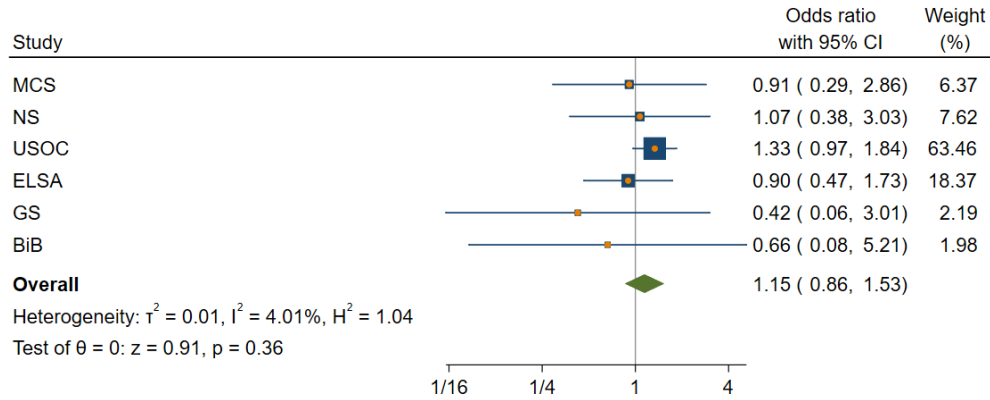

Random-effects REML model

Any healthcare disruption  
South Asian vs White

full adjustment

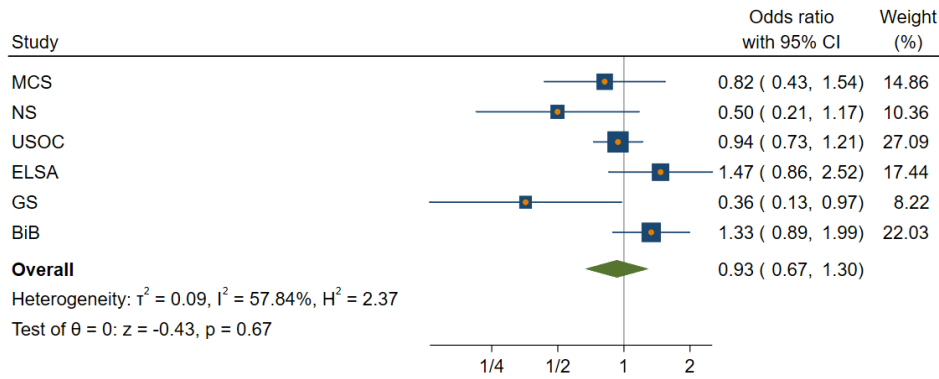

Random-effects REML model

Any healthcare disruption  
East Asian vs White

full adjustment

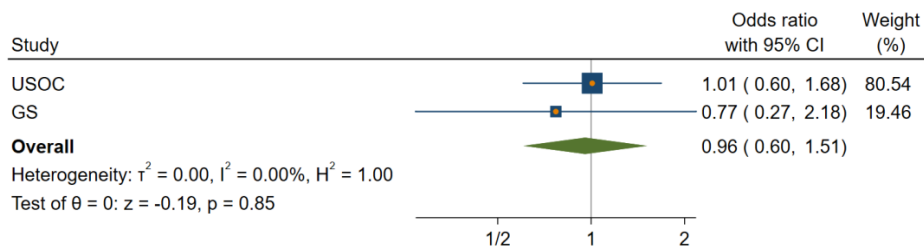

Random-effects REML model

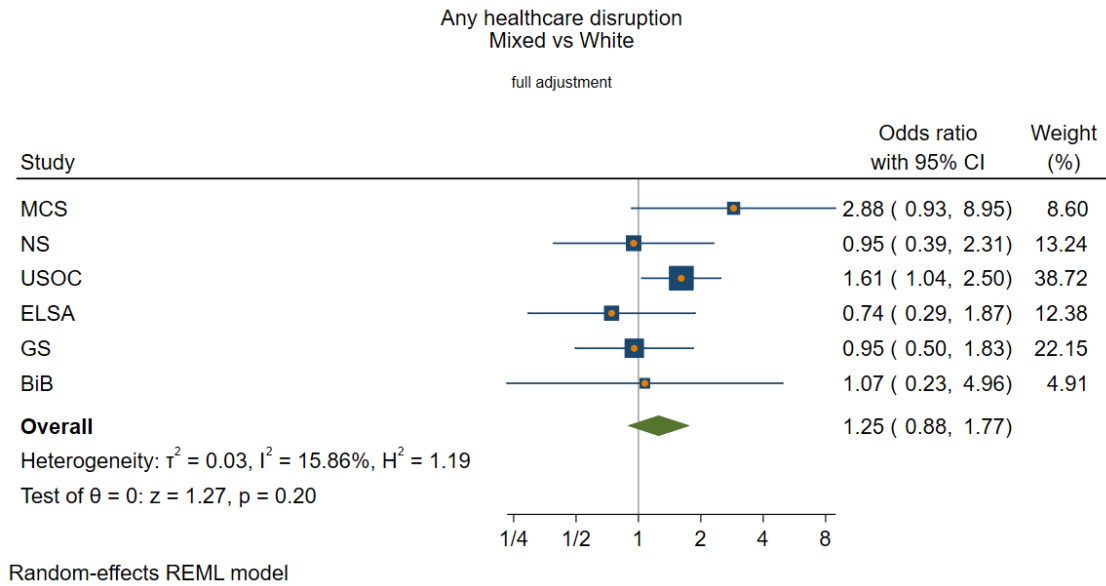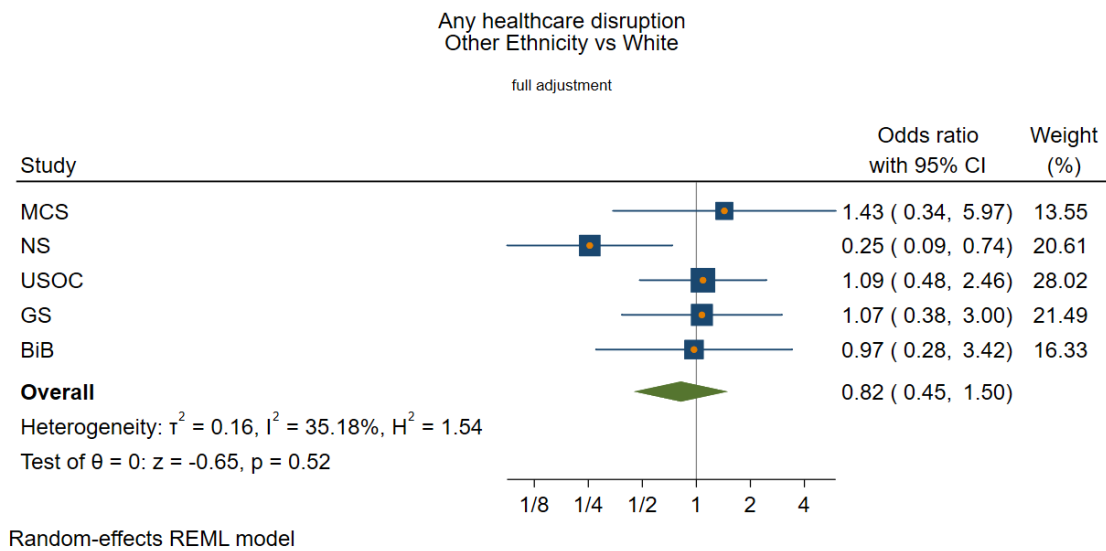

## Appointments

Sex  
Unadjusted

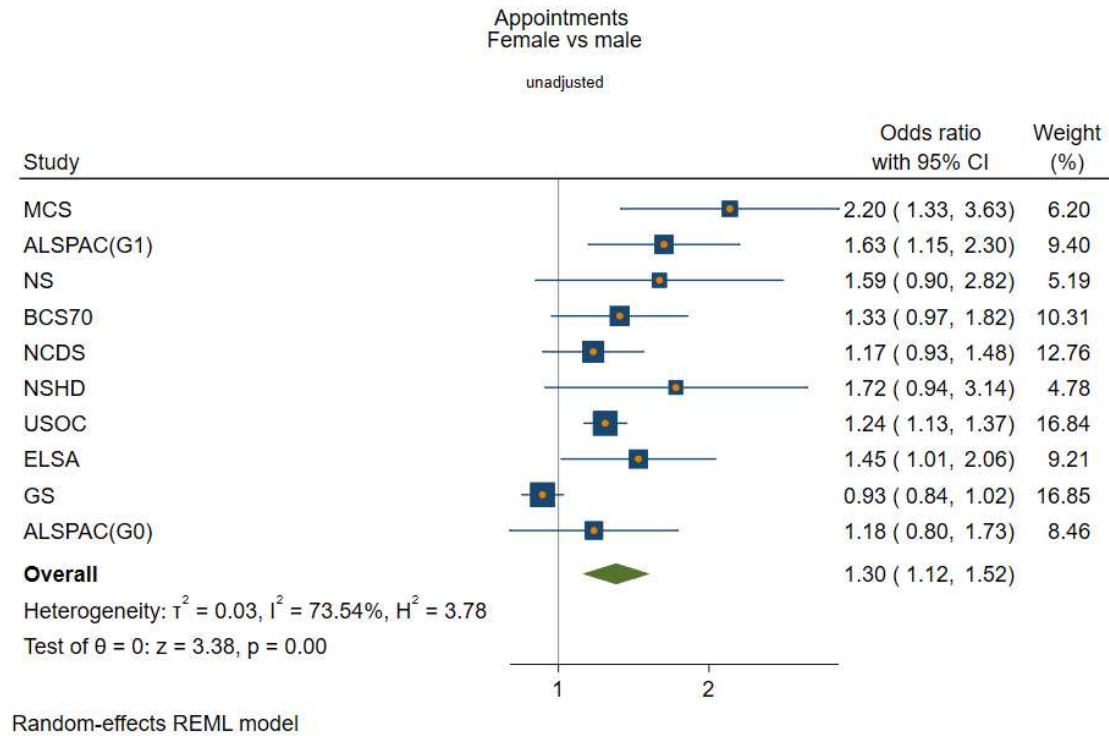

Basic adjustment

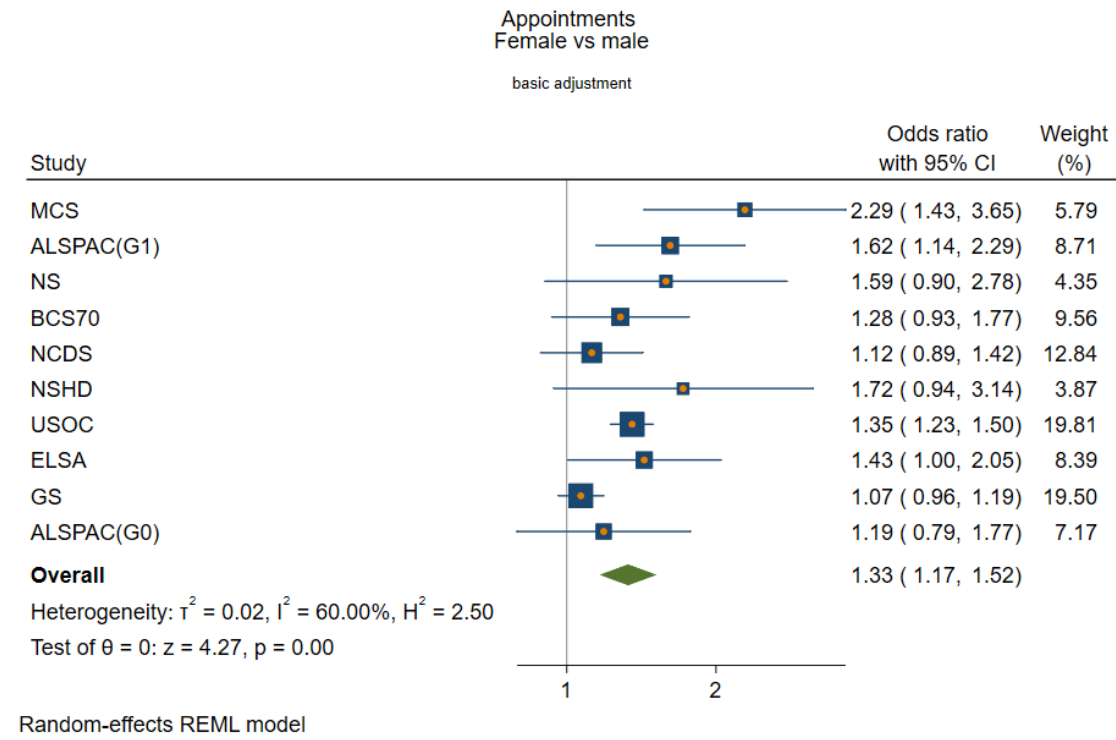

### Full adjustment

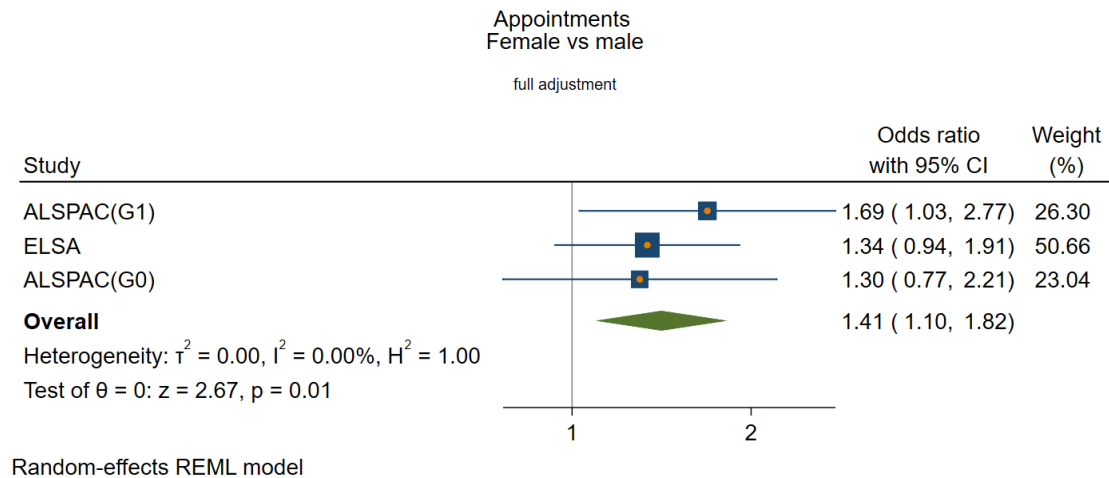

*Occupational class*  
Unadjusted

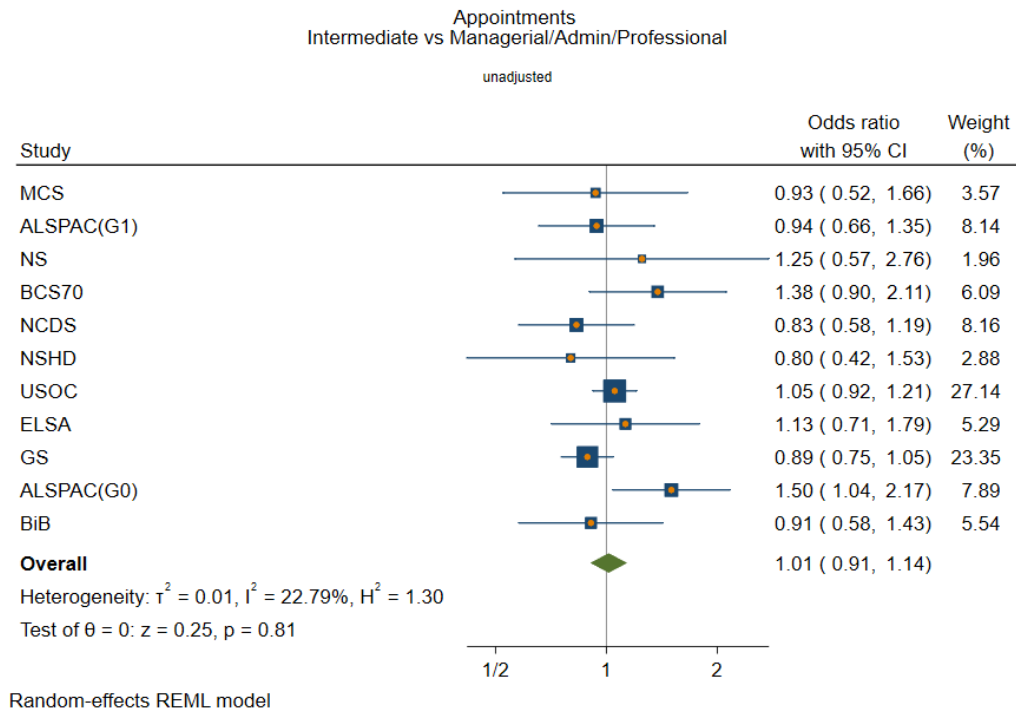



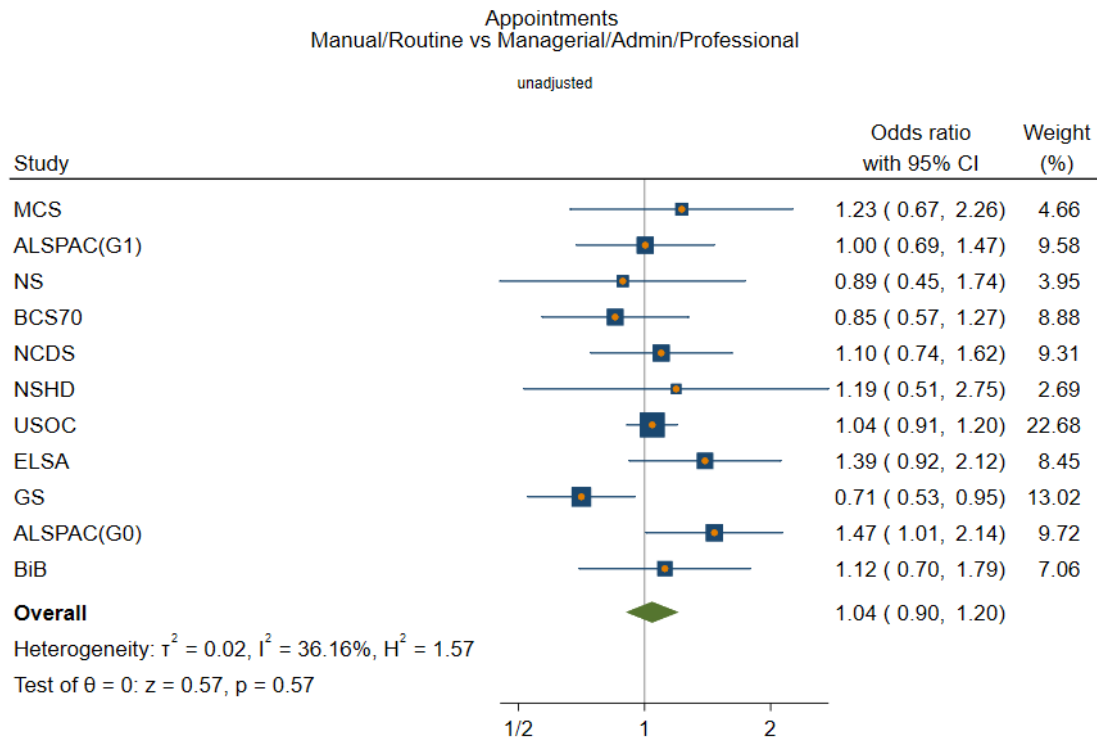

Random-effects REML model

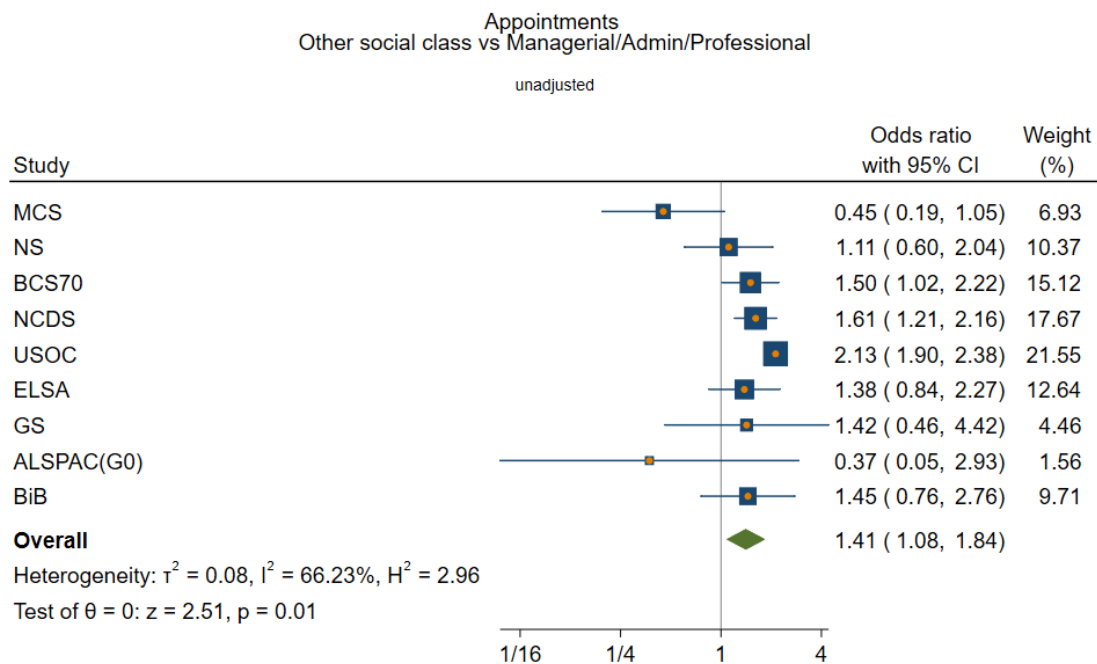

Random-effects REML model

Basic adjustment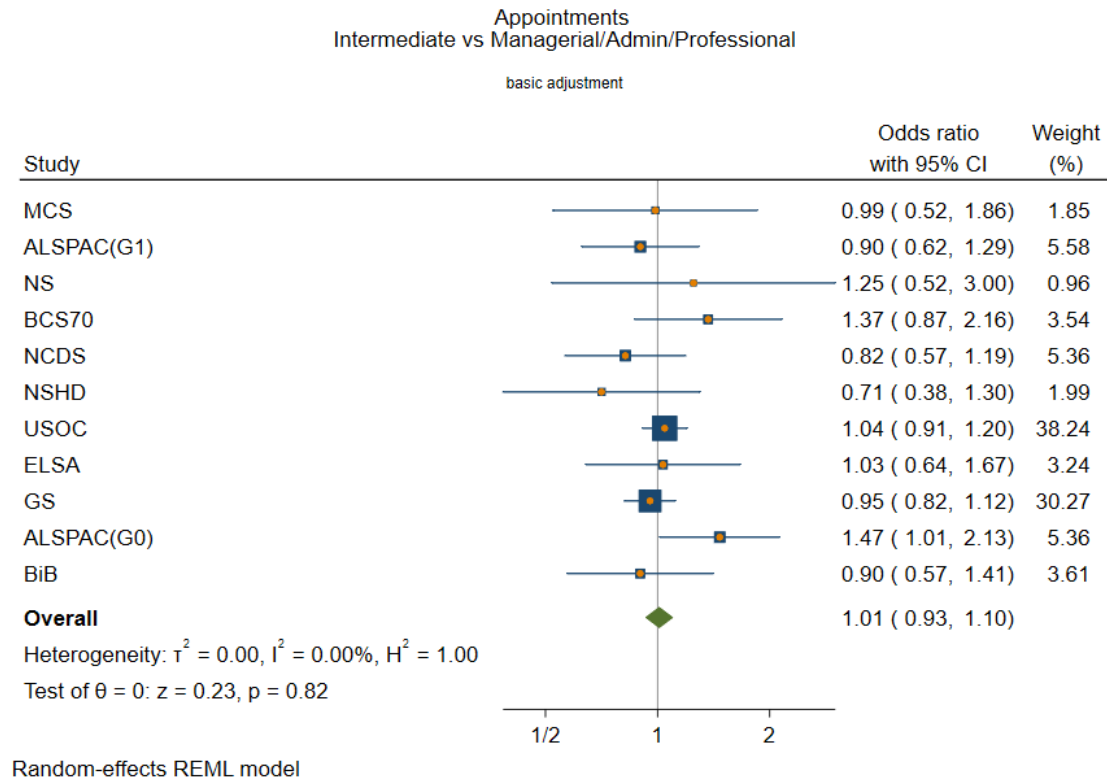

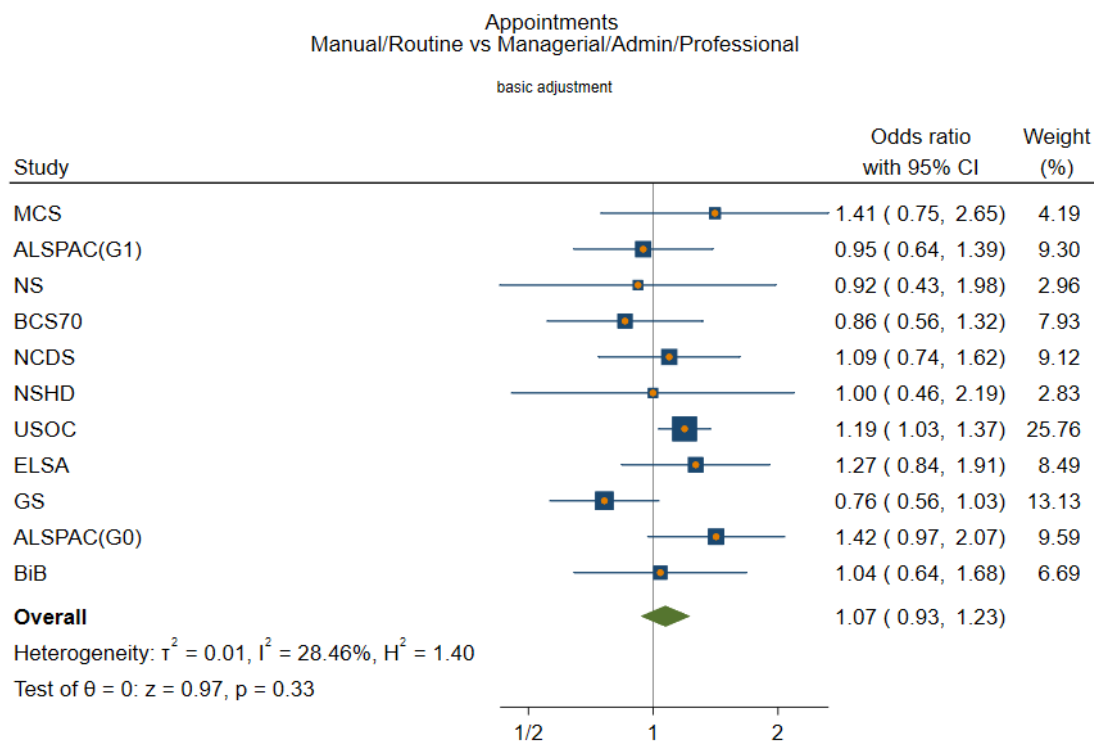

Random-effects REML model

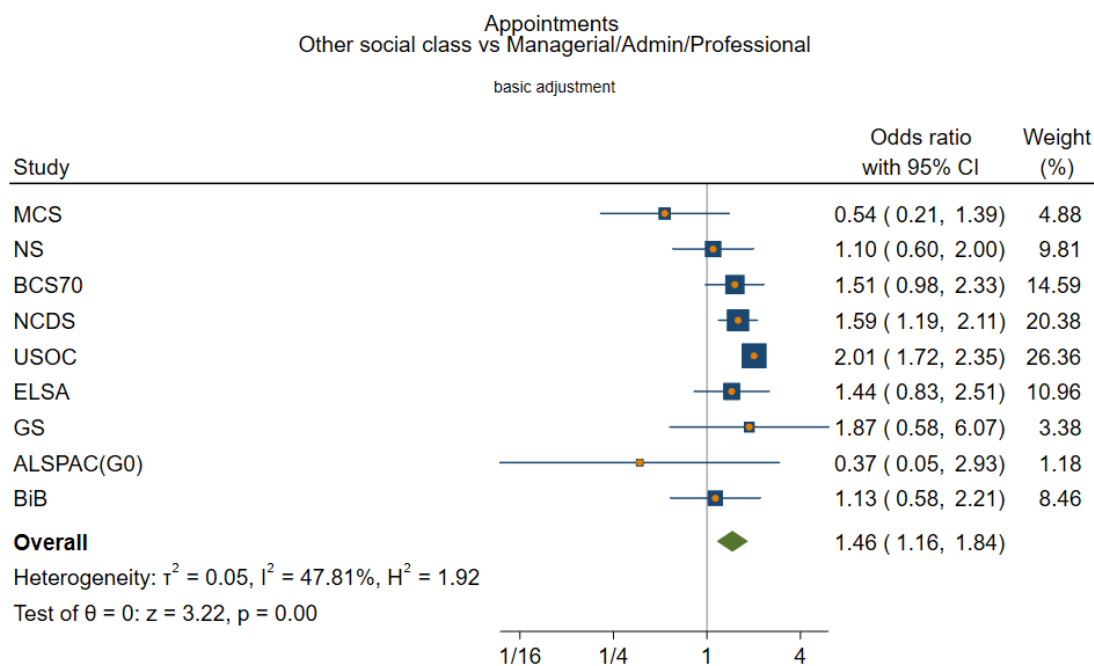

Random-effects REML model

Full adjustment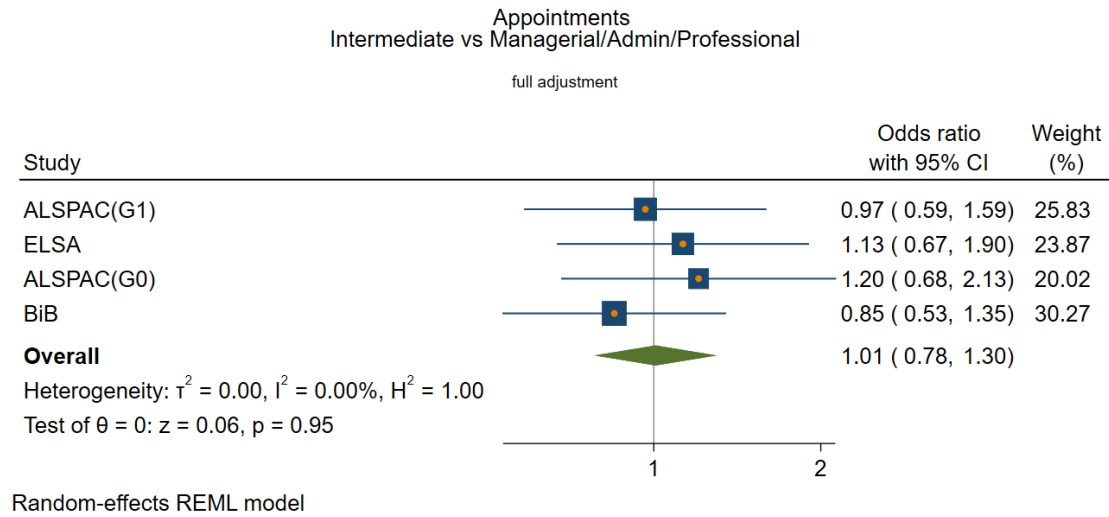

Appointments  
Manual/Routine vs Managerial/Admin/Professional

full adjustment

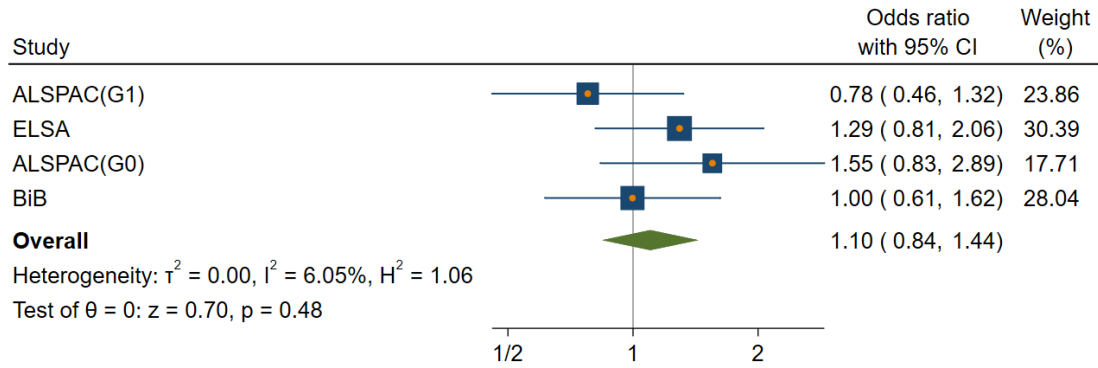

Random-effects REML model

Appointments  
Other social class vs Managerial/Admin/Professional

full adjustment

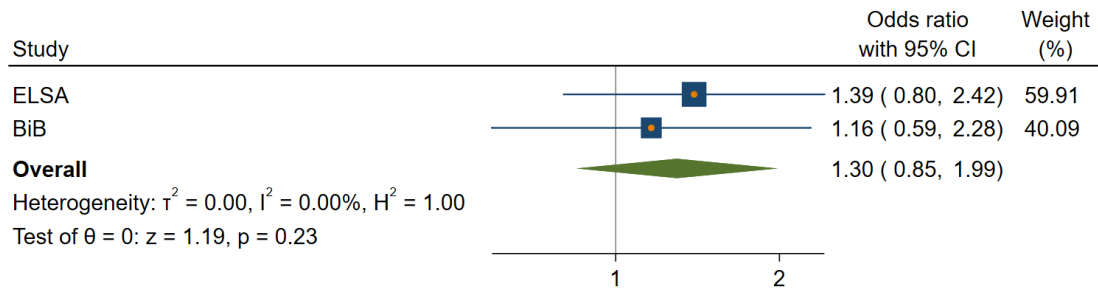

Random-effects REML model

*Education*  
Unadjusted

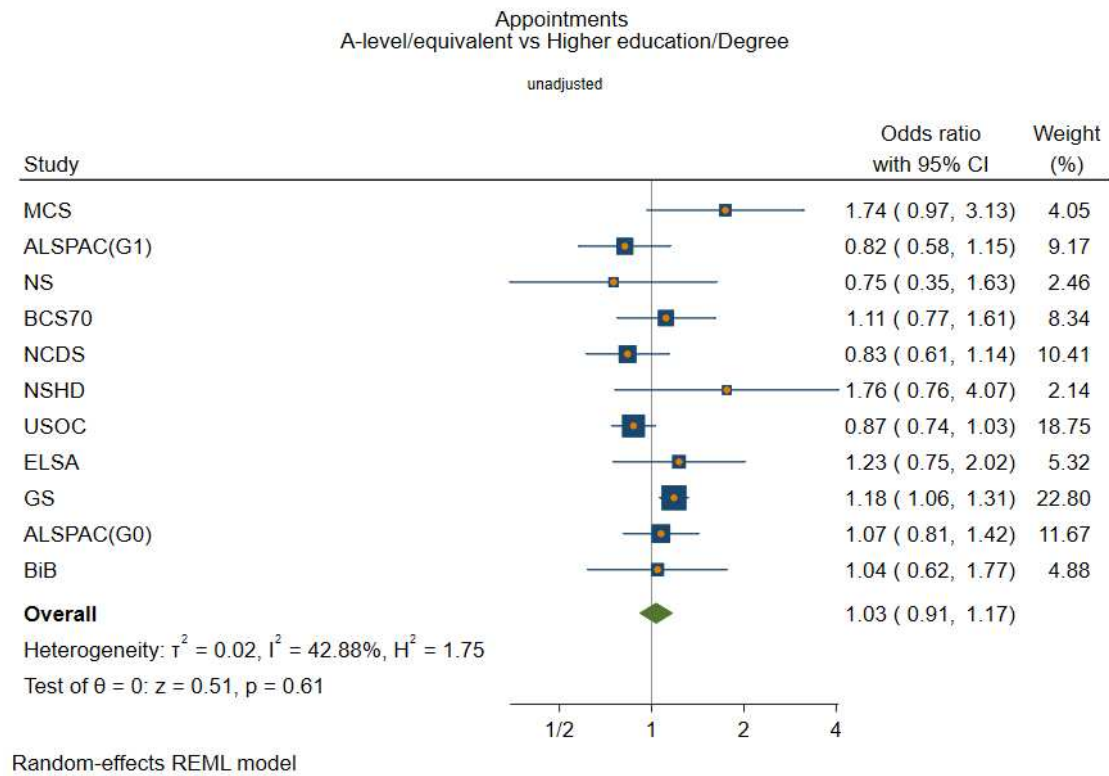

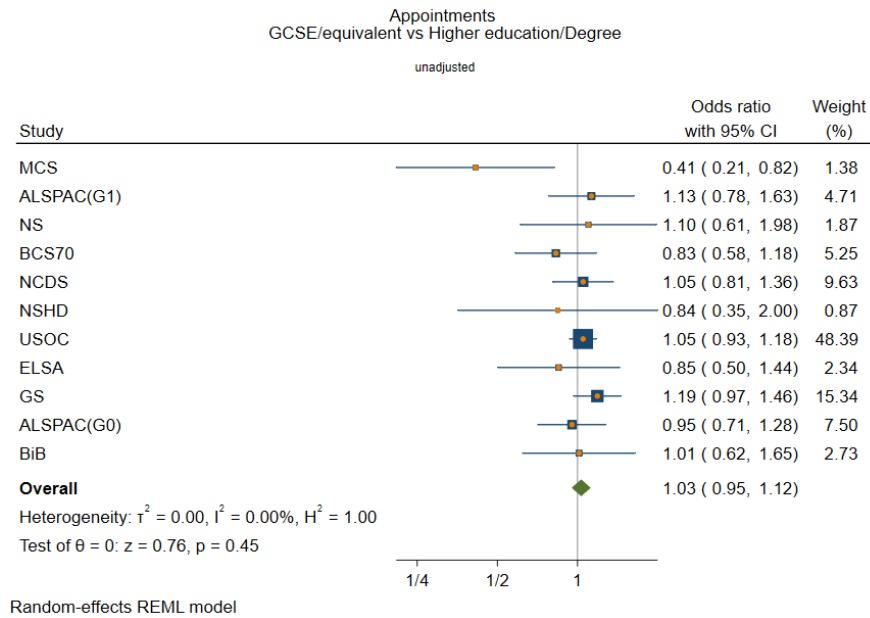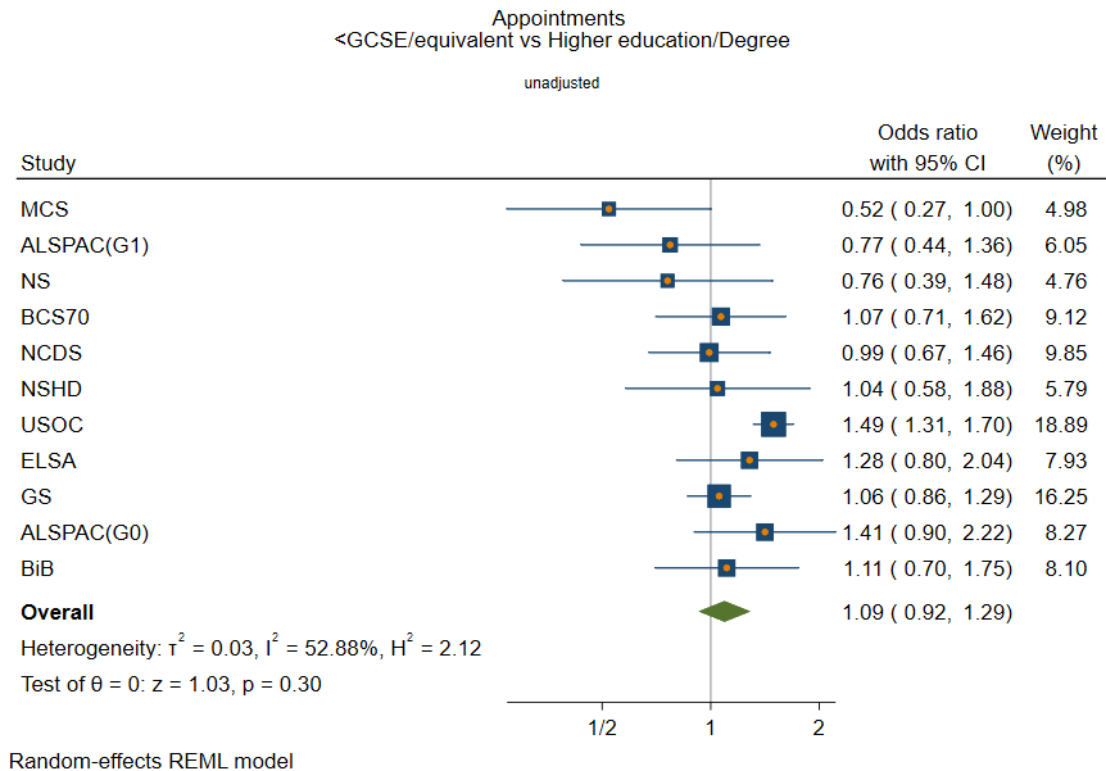

Basic adjustment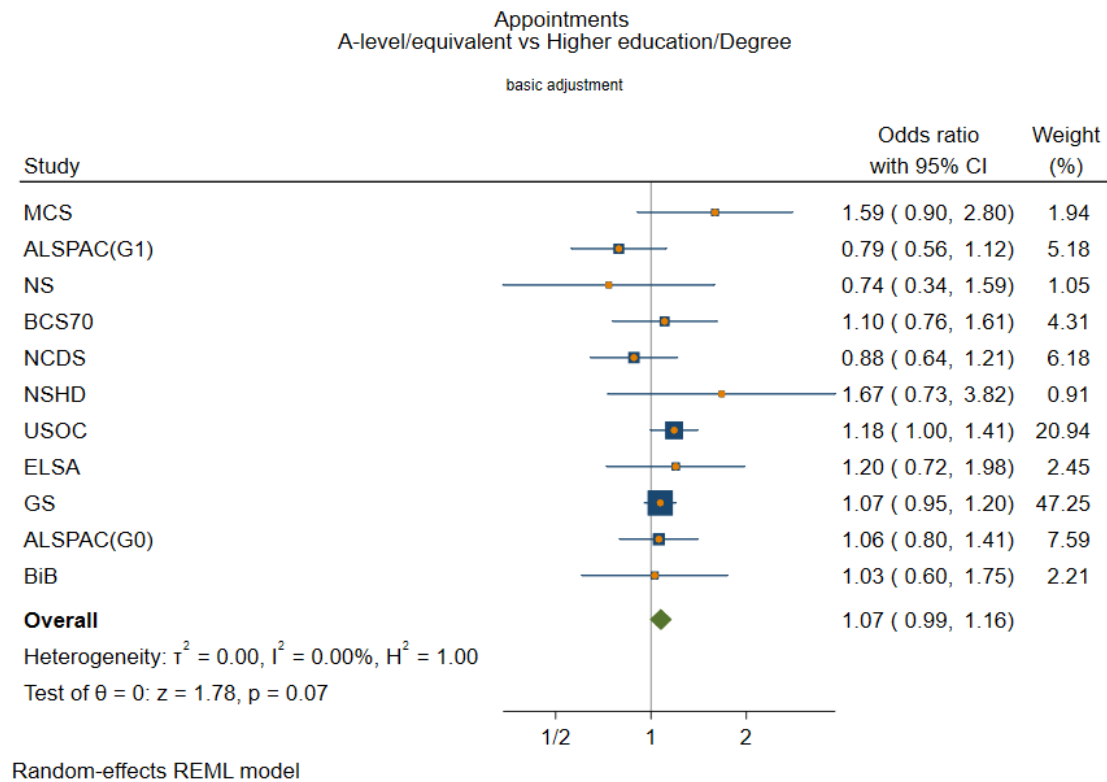



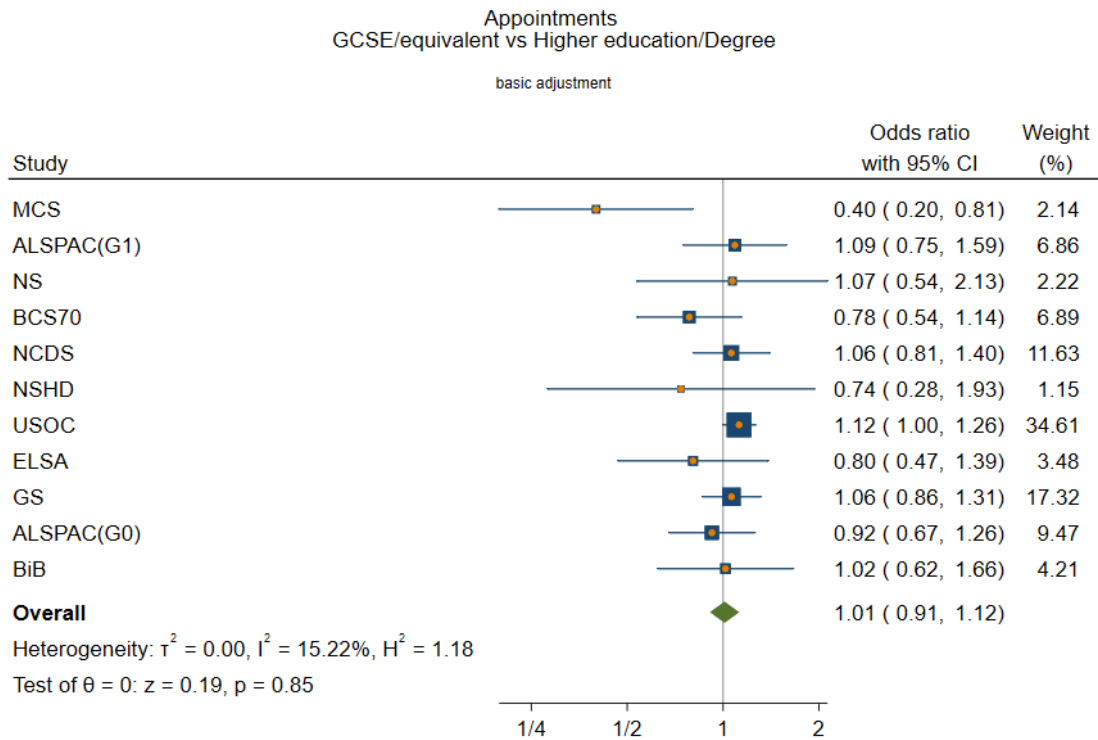

Random-effects REML model

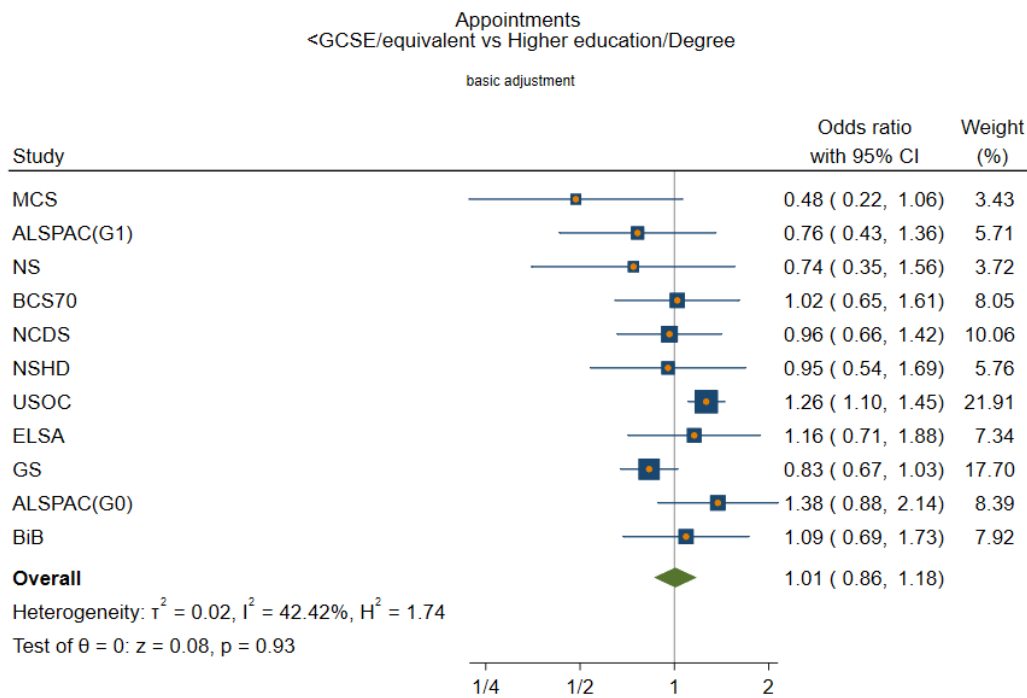

Random-effects REML model

Full Adjustment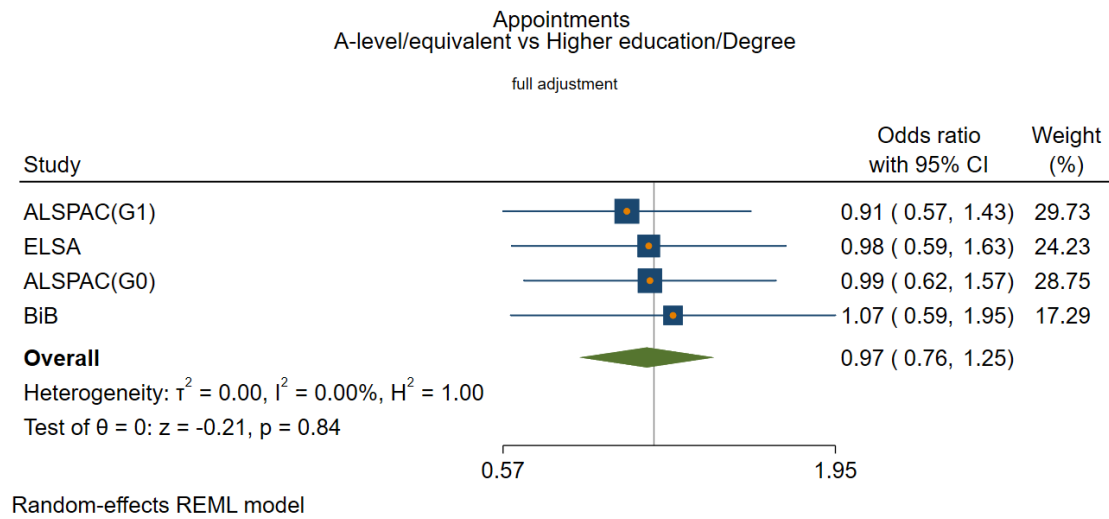

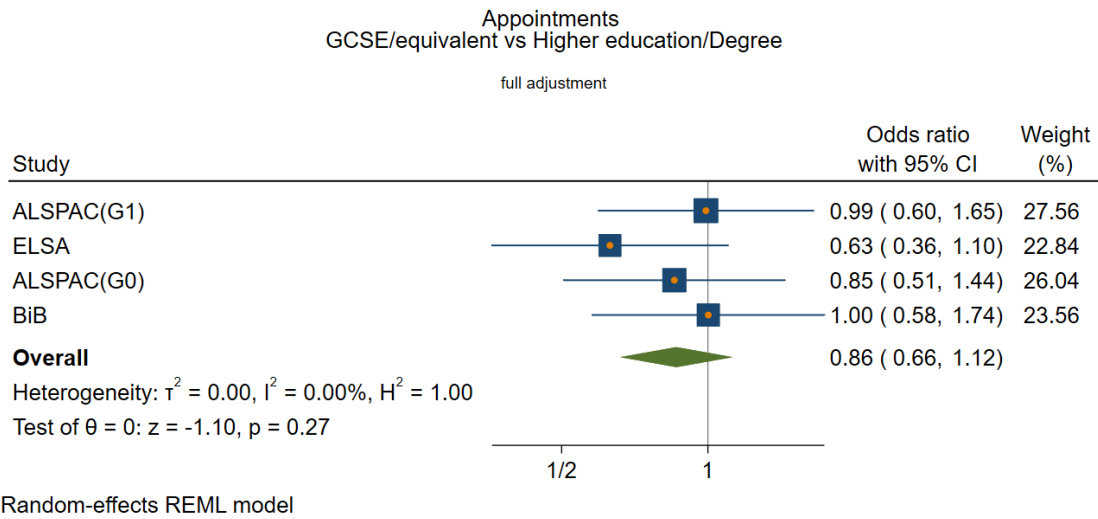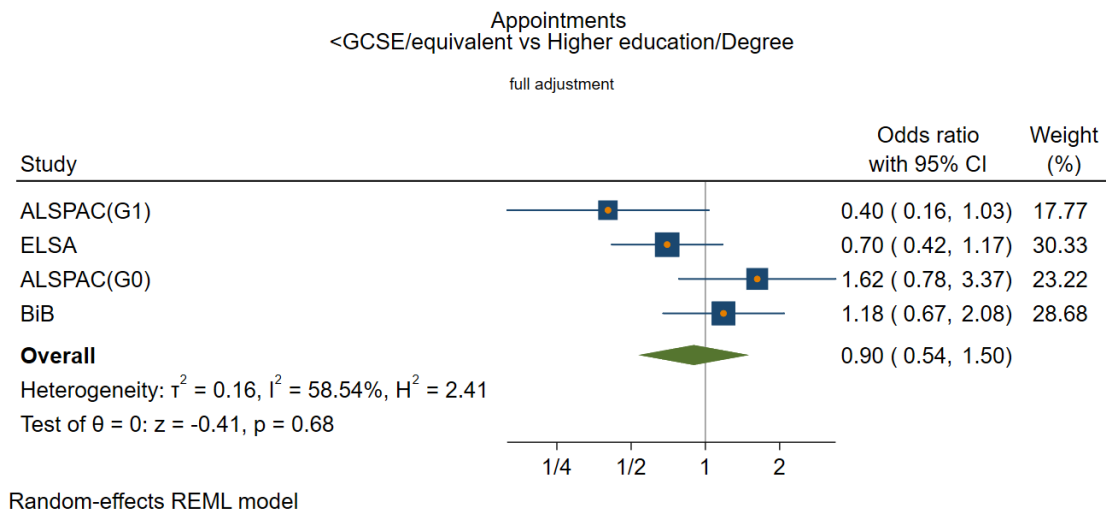

Age  
Unadjusted

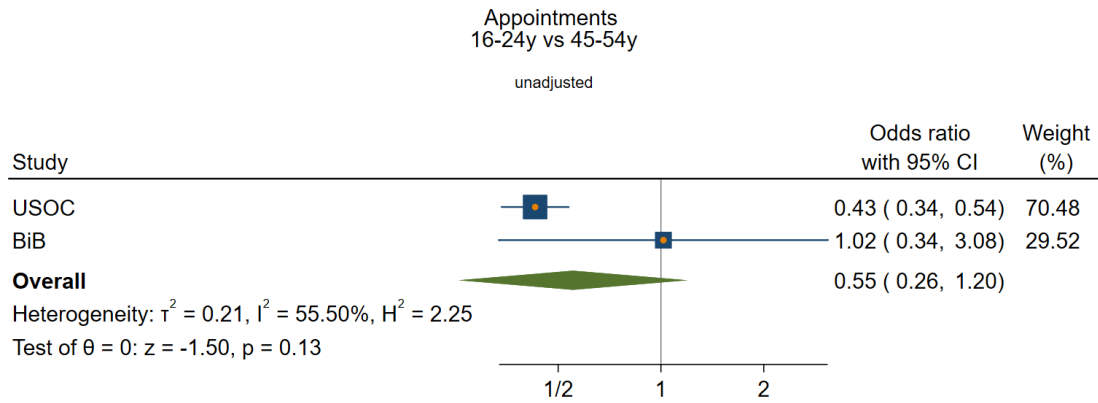

Random-effects REML model

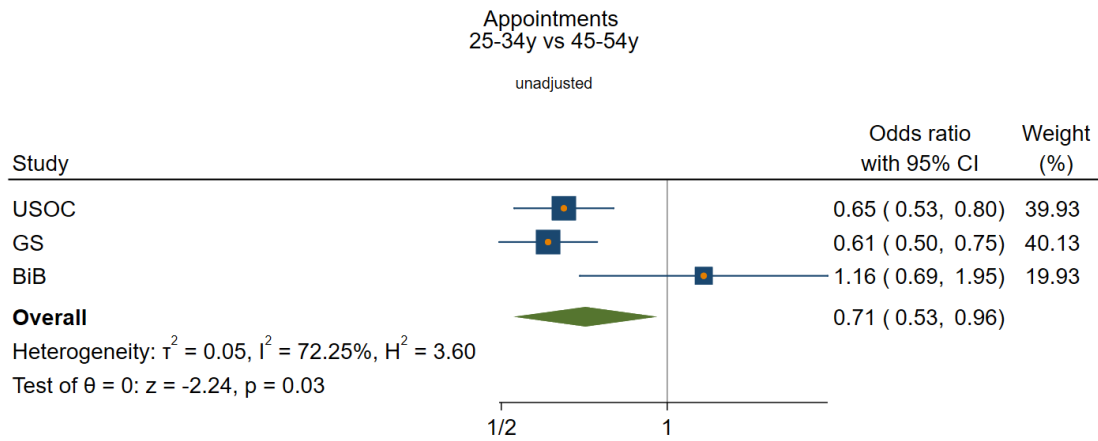

Random-effects REML model

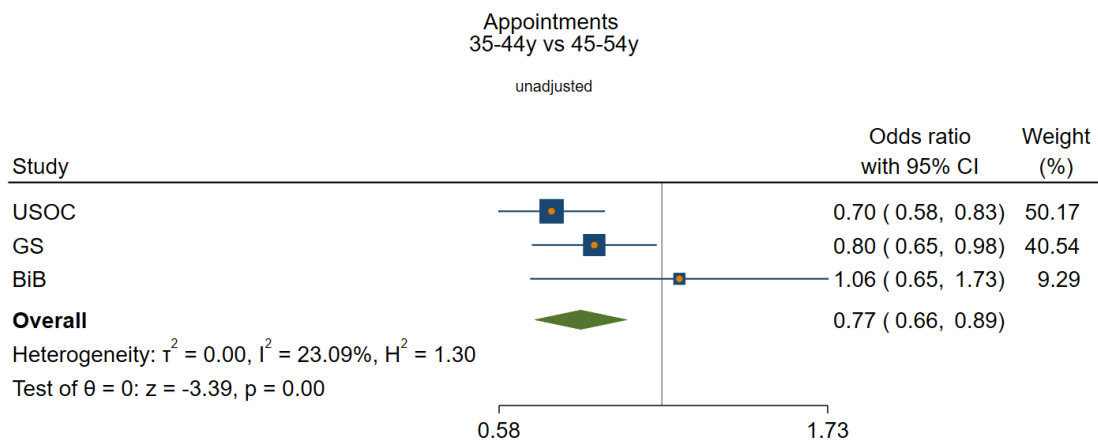

Random-effects REML model

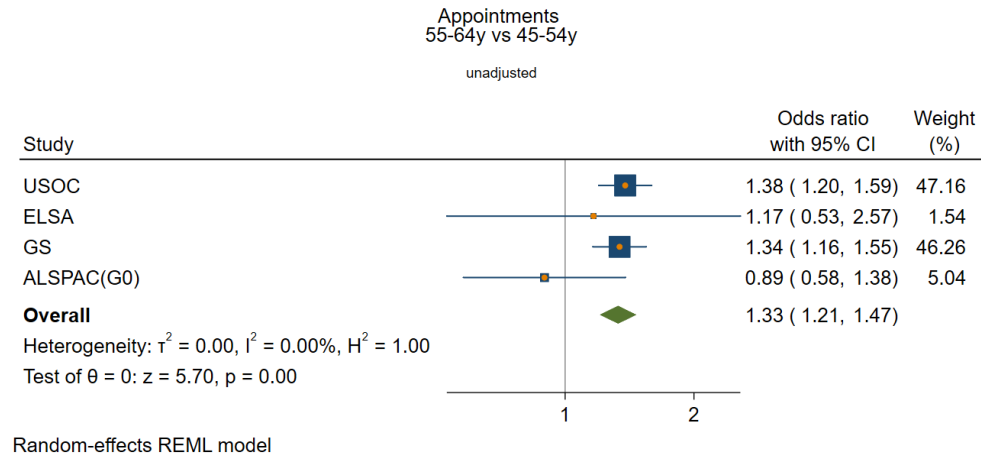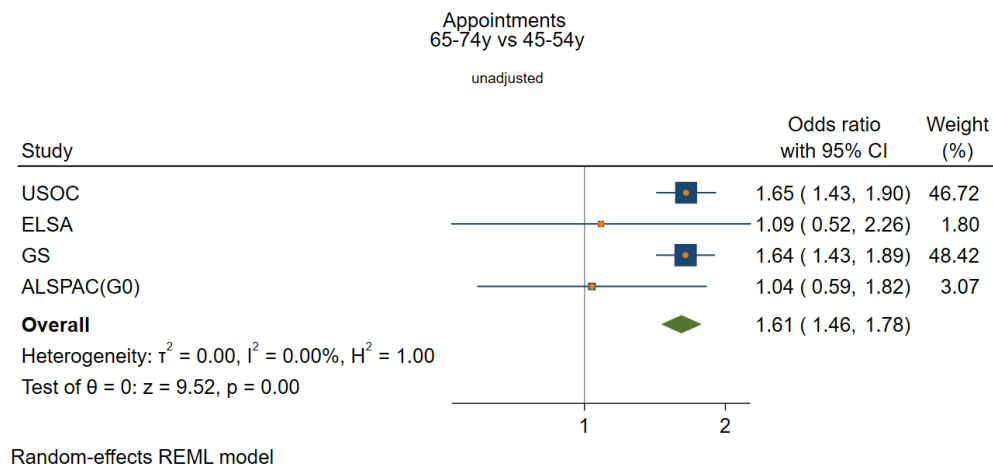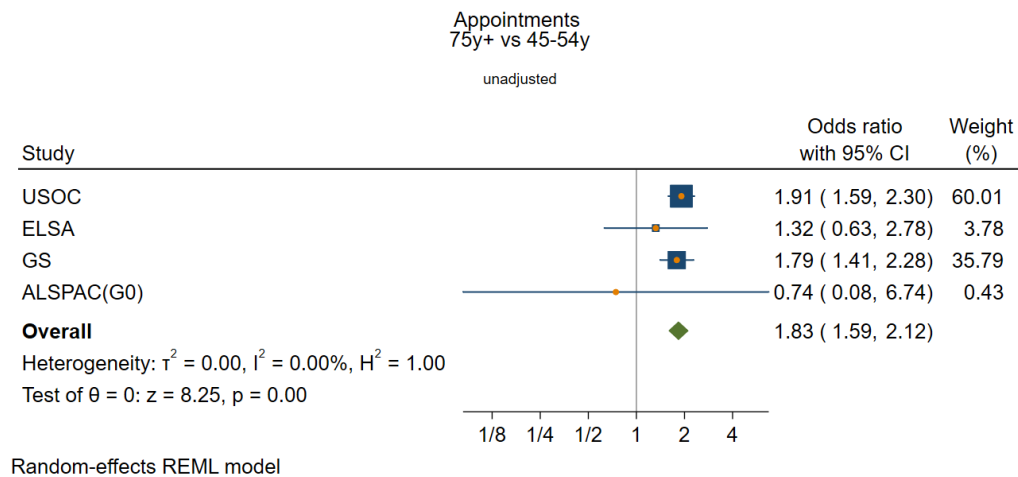

Basic adjustment

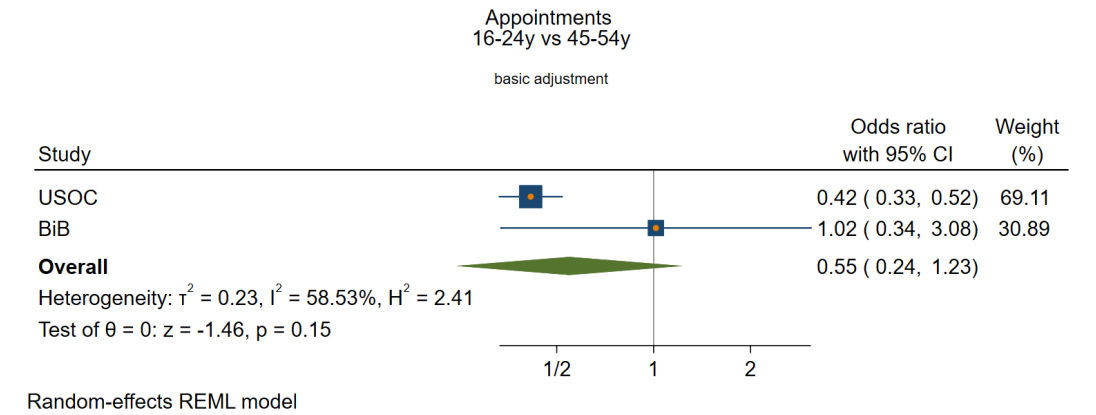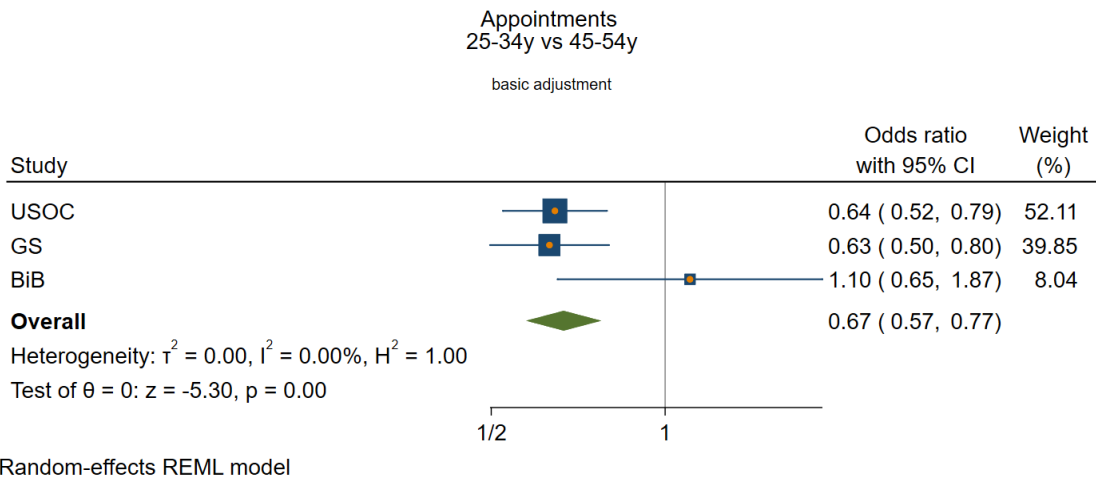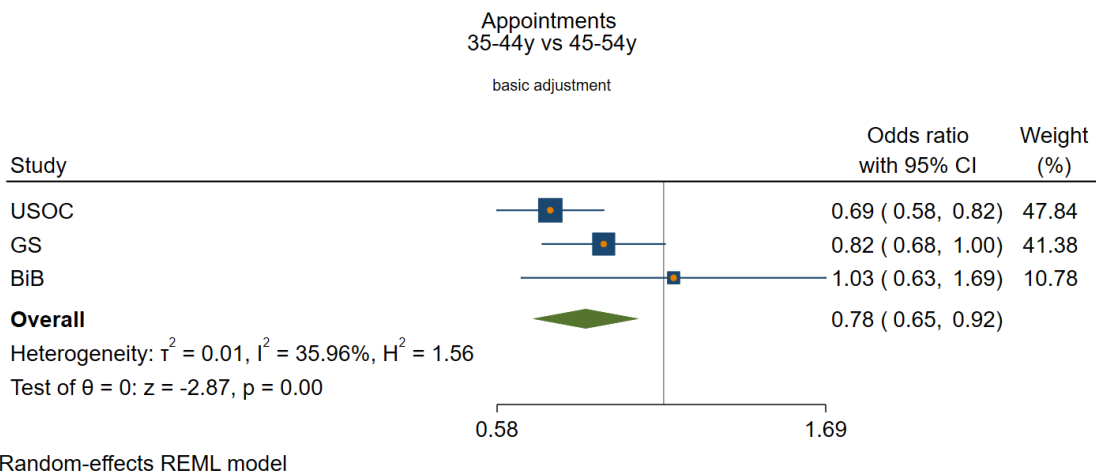

Appointments  
55-64y vs 45-54y

basic adjustment

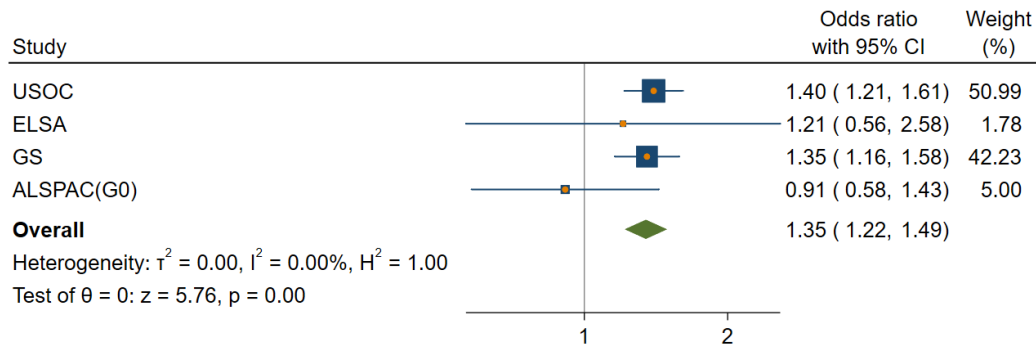

Random-effects REML model

Appointments  
65-74y vs 45-54y

basic adjustment

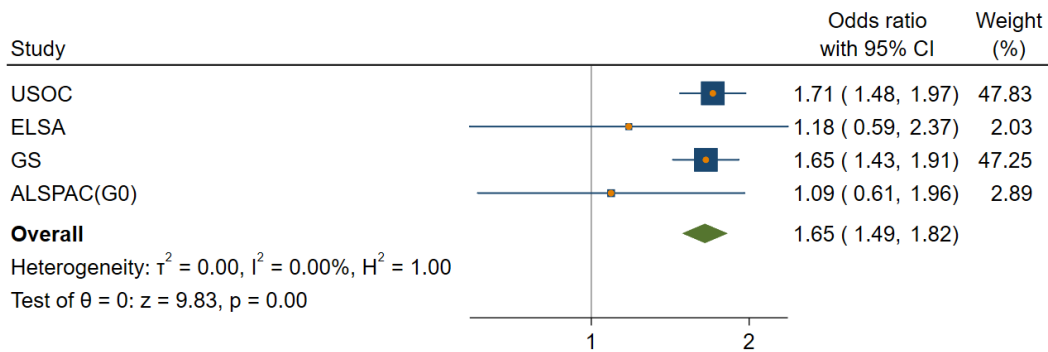

Random-effects REML model

Appointments  
75y+ vs 45-54y

basic adjustment

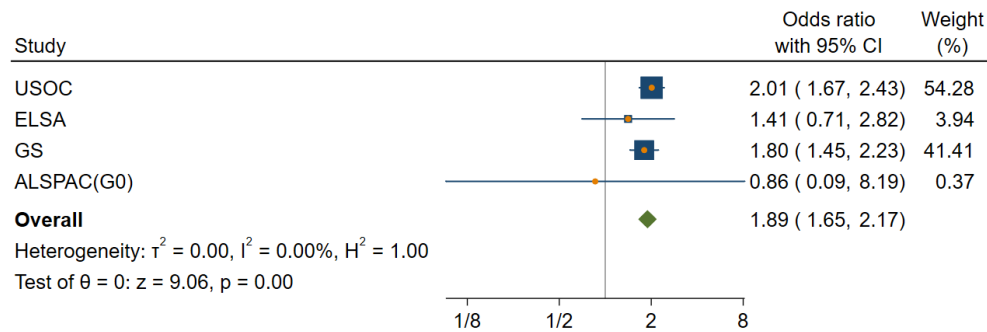

Random-effects REML model

Full adjustment

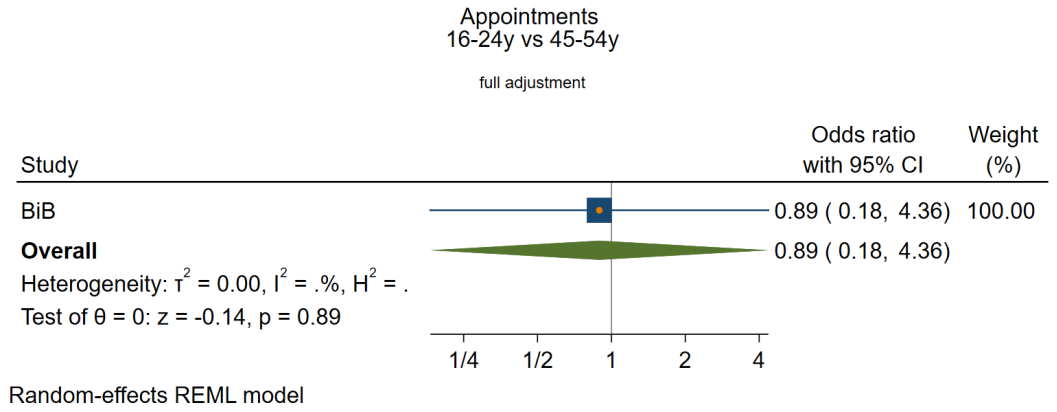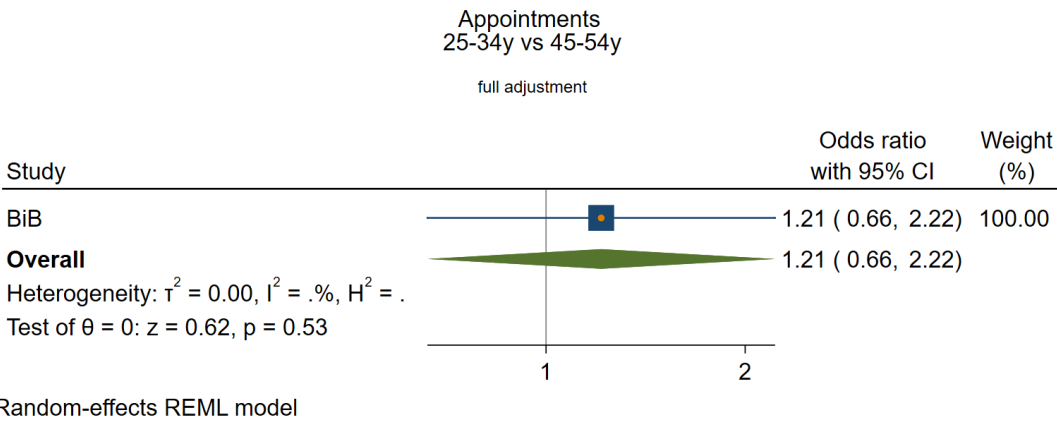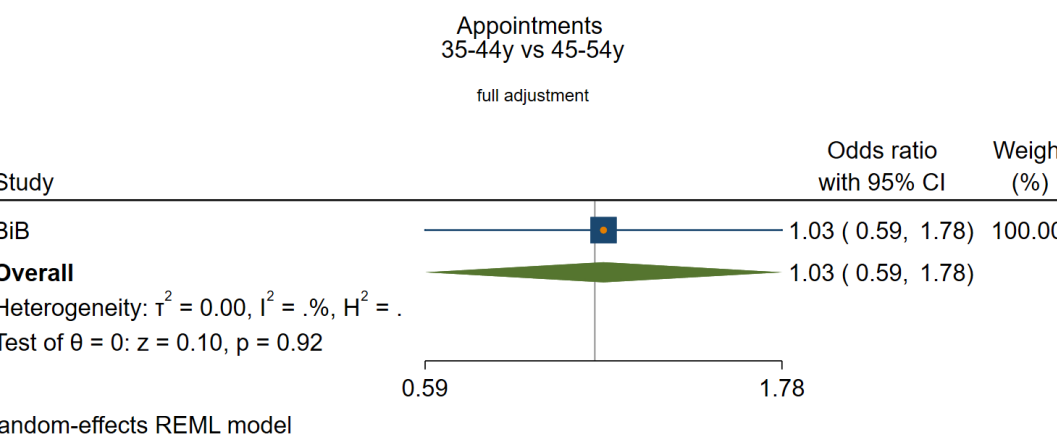



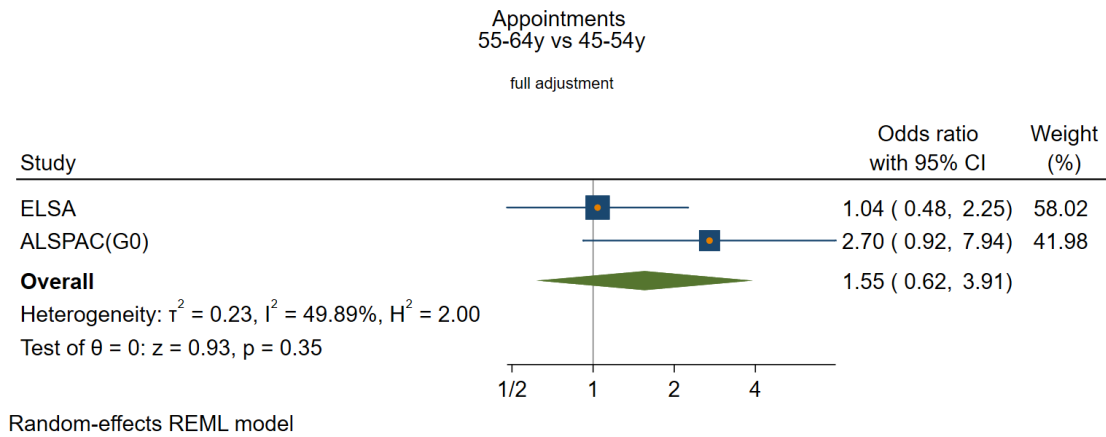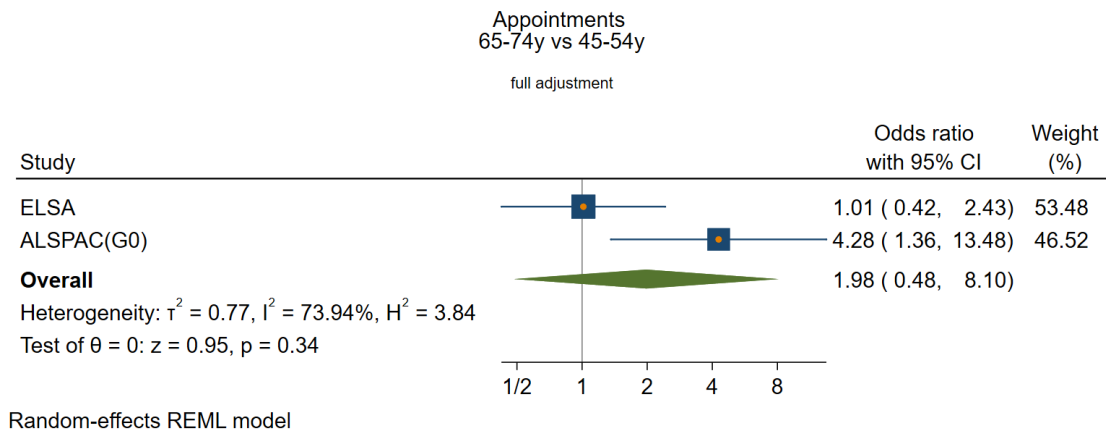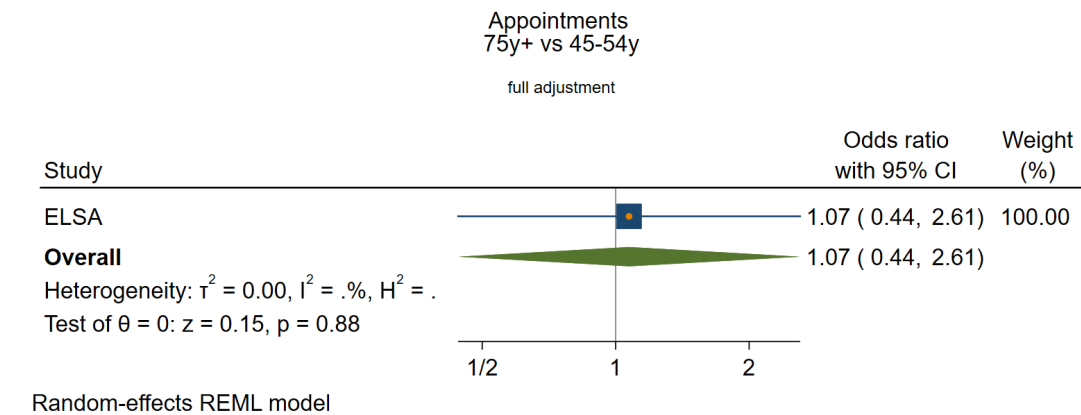

*Ethnicity*  
Unadjusted

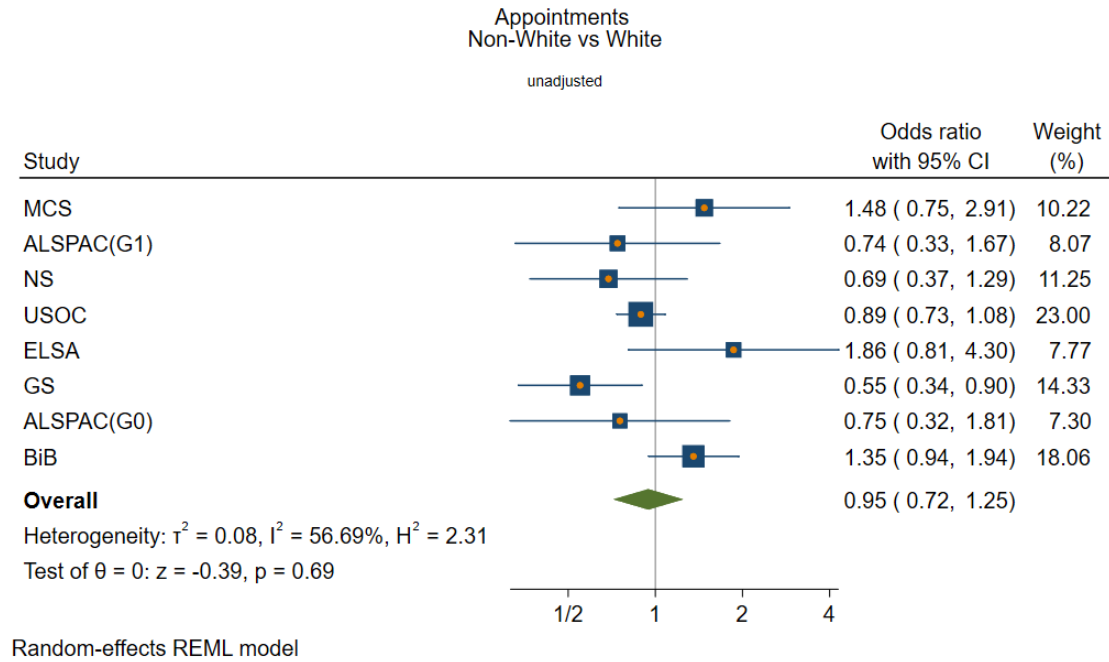

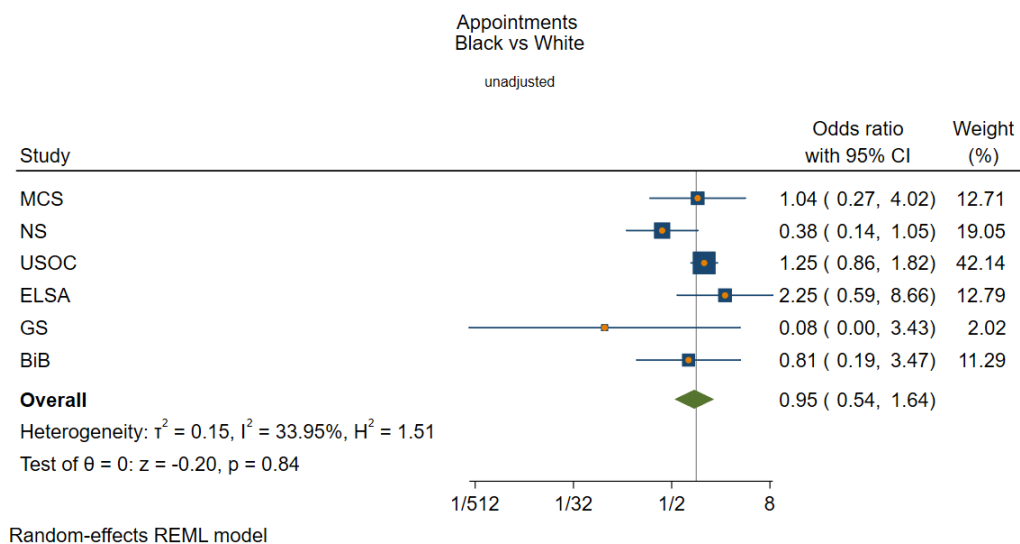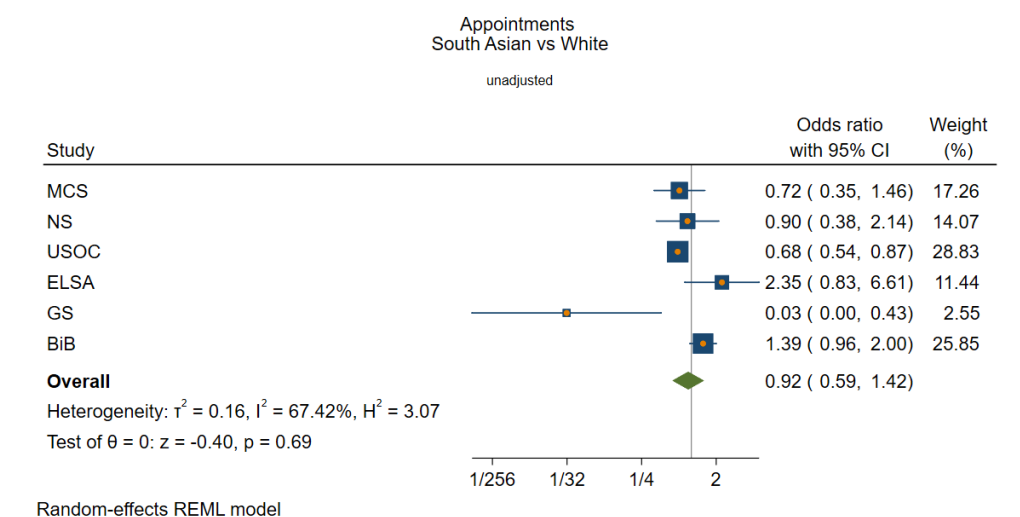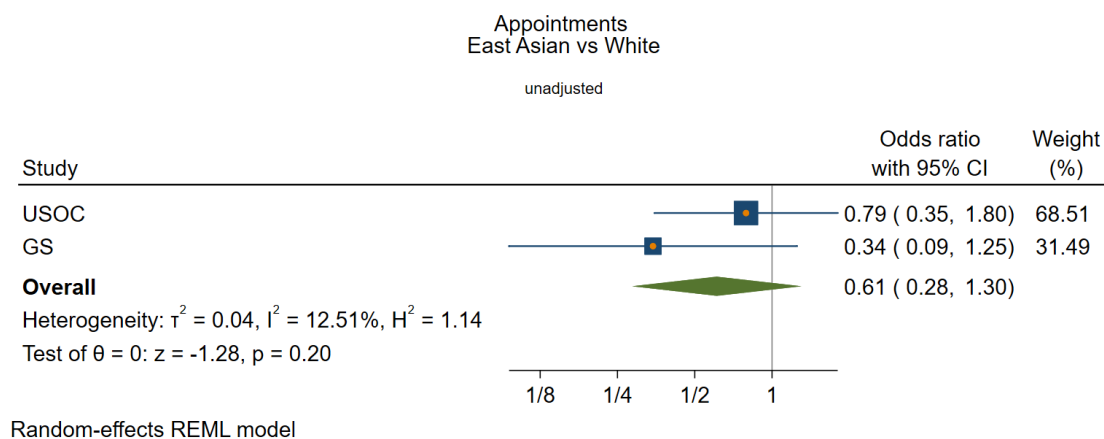

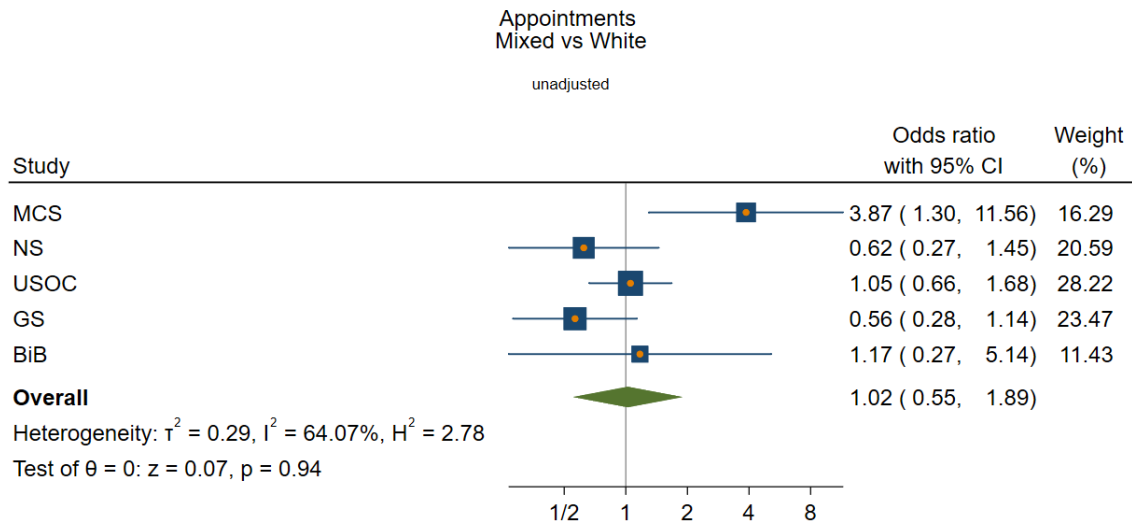

Random-effects REML model

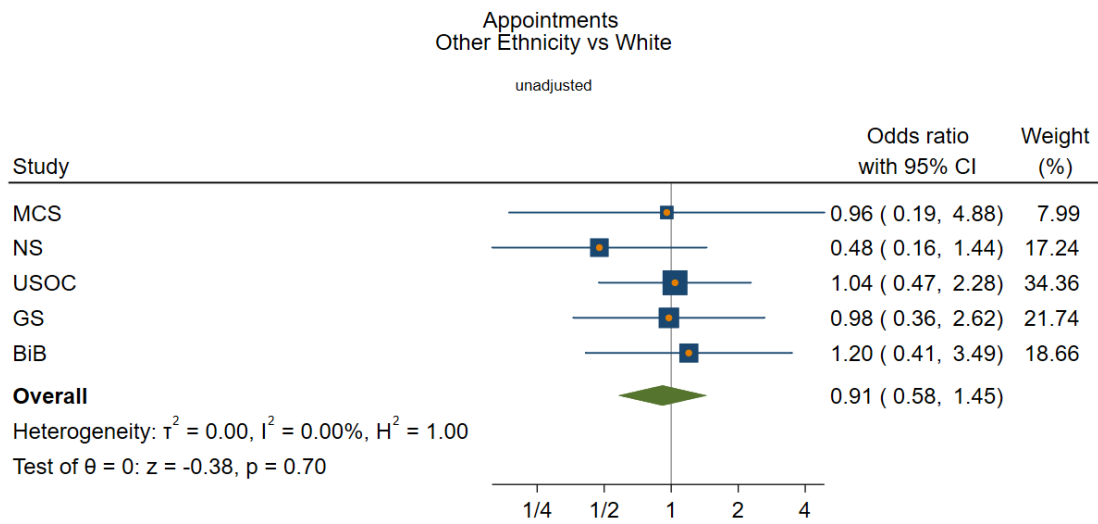

Random-effects REML model

Basic adjustment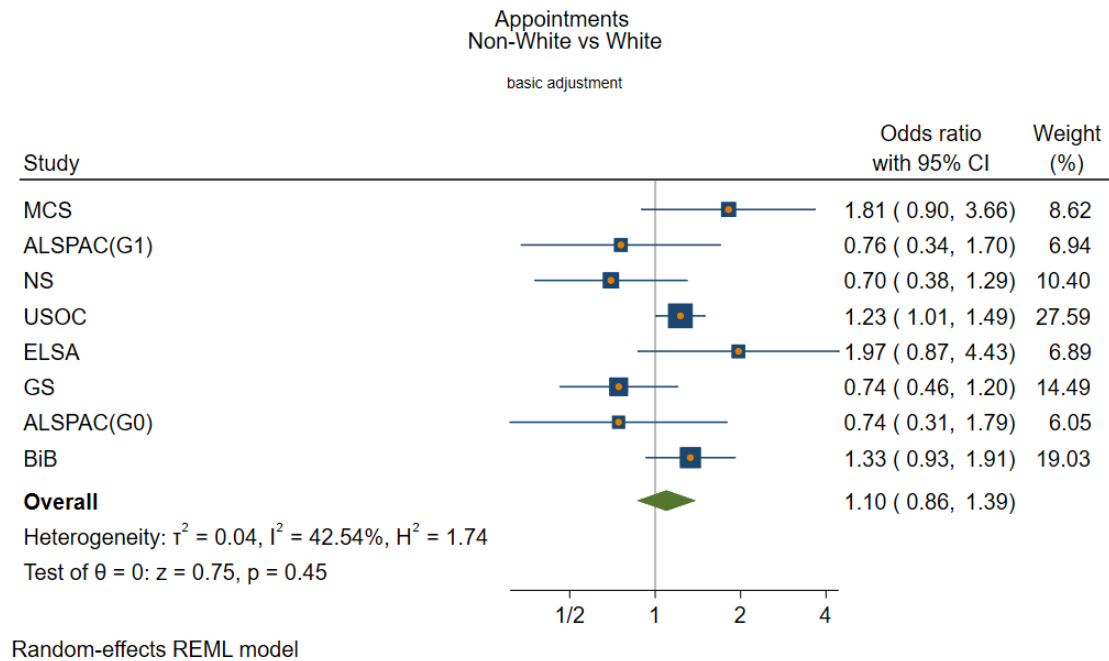

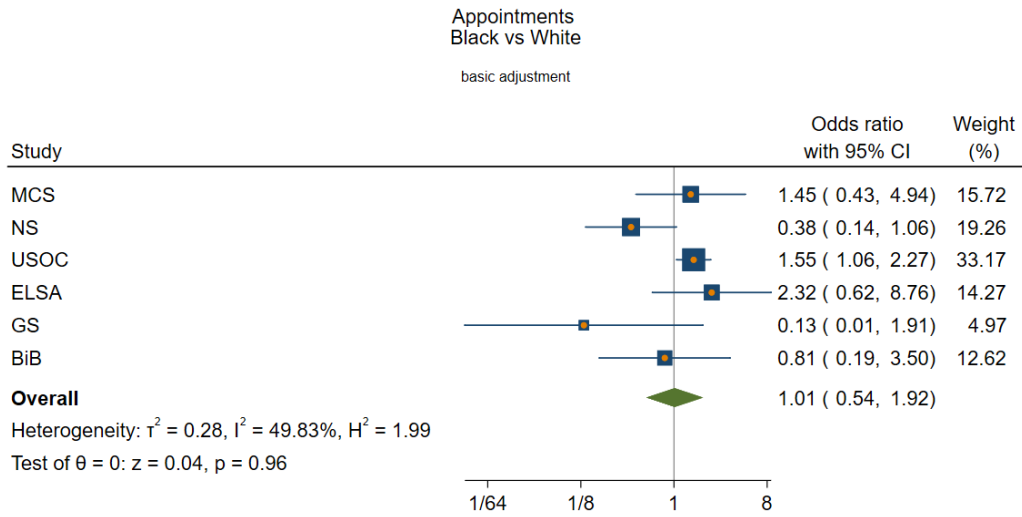

Random-effects REML model

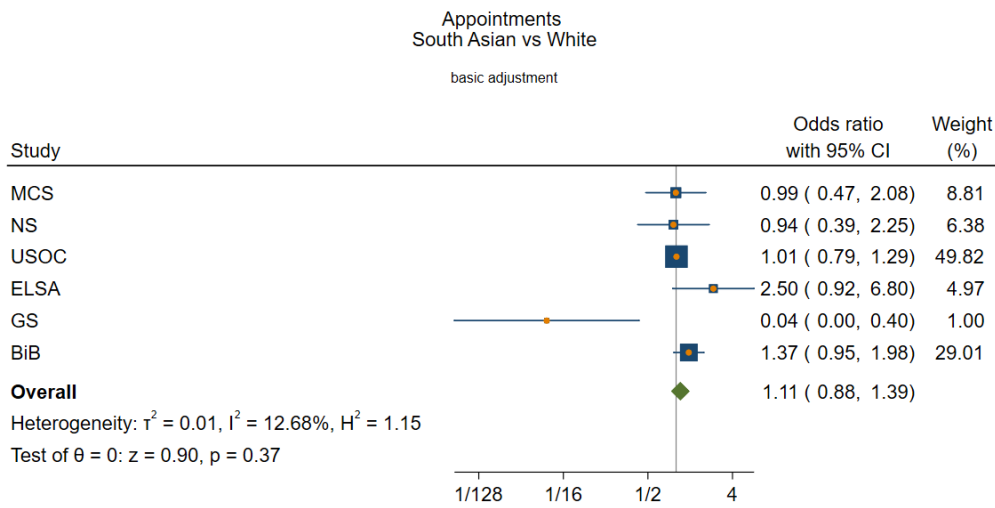

Random-effects REML model

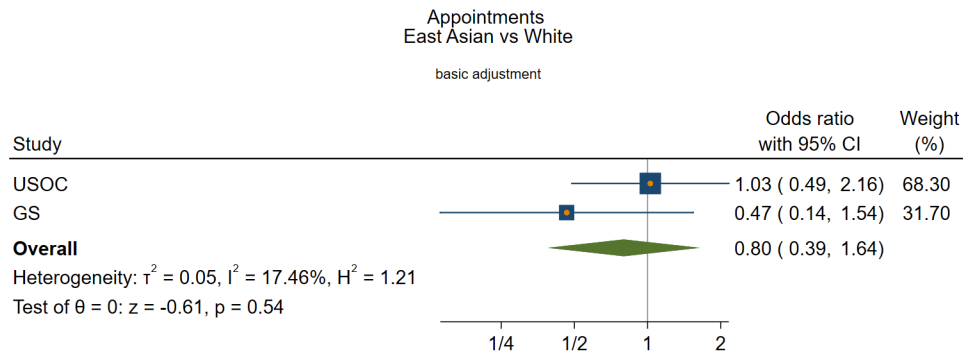

Random-effects REML model

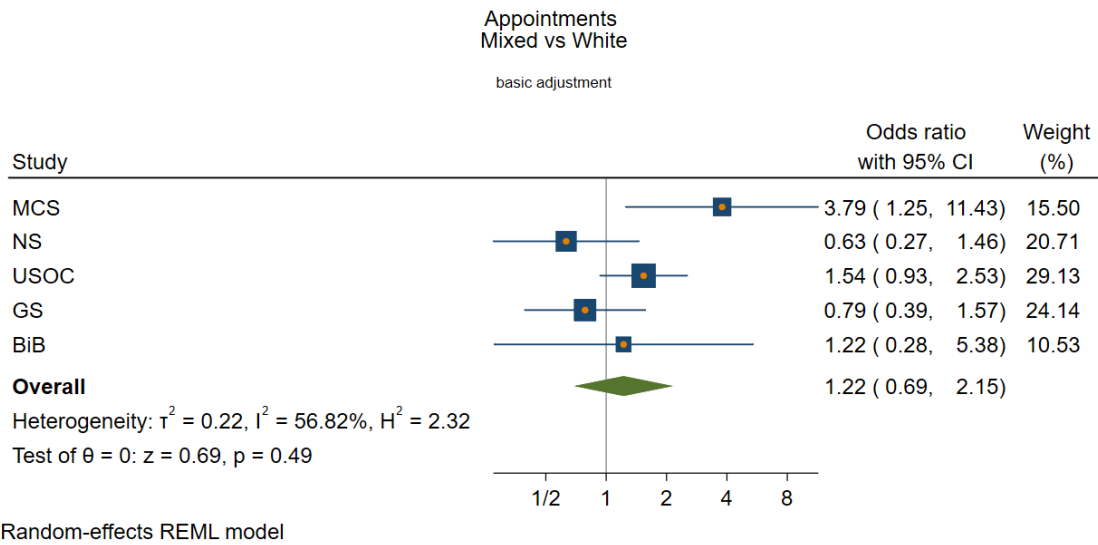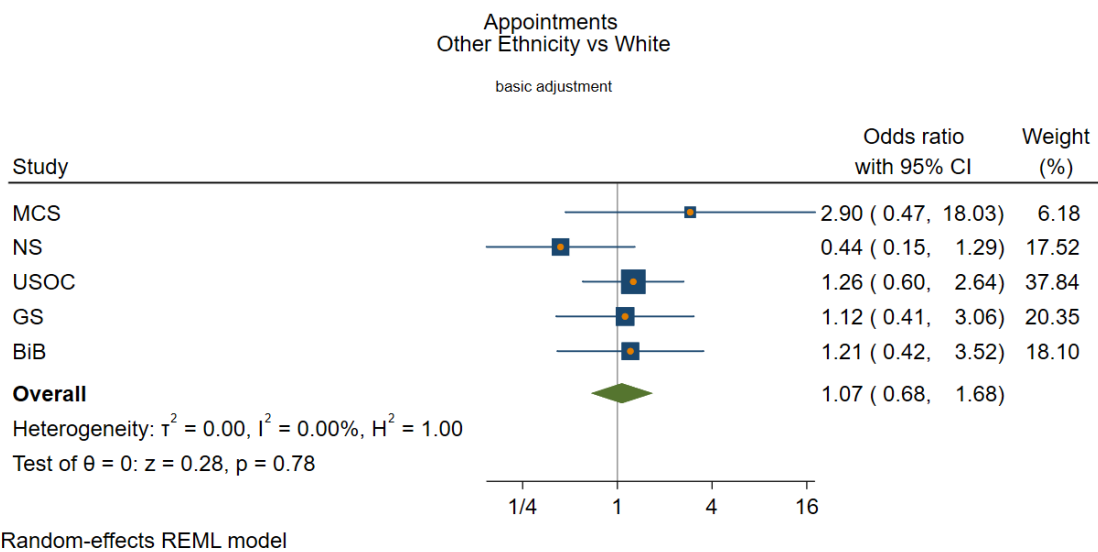

Full adjustment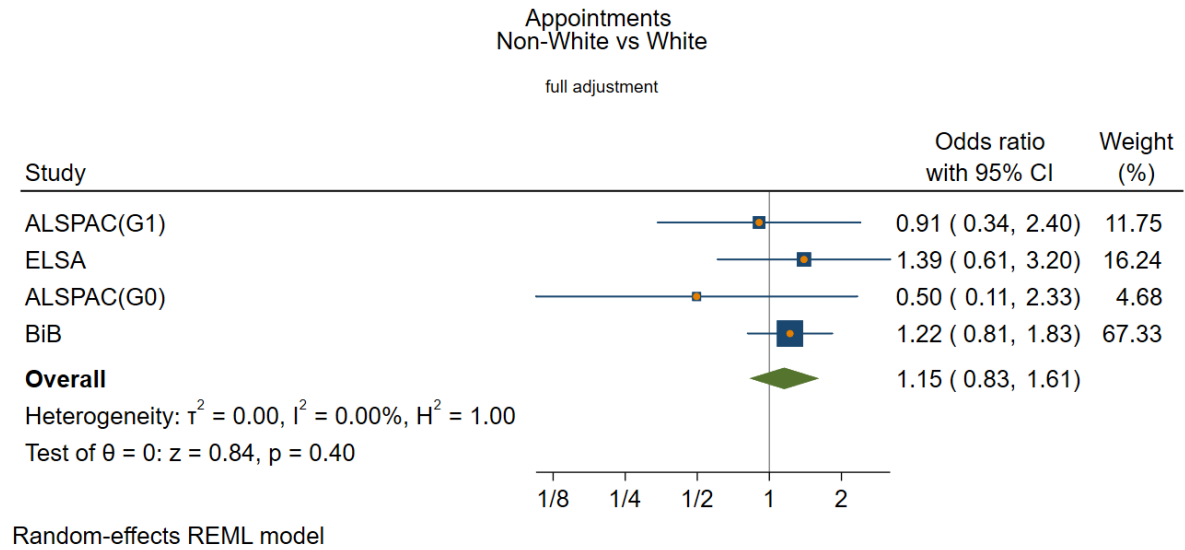



Appointments  
Black vs White

full adjustment

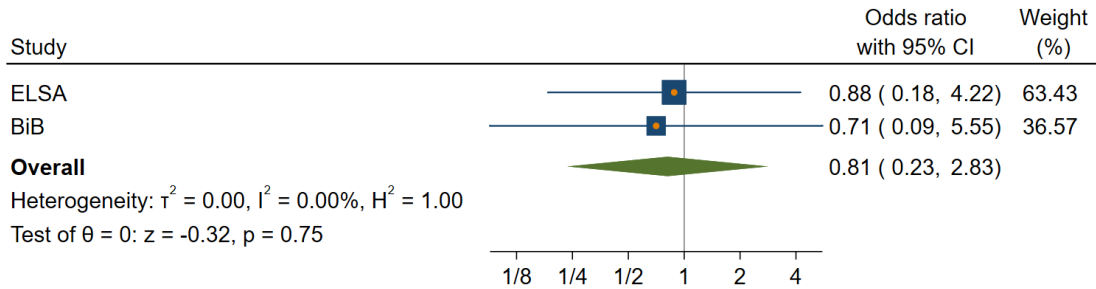

Random-effects REML model

Appointments  
South Asian vs White

full adjustment

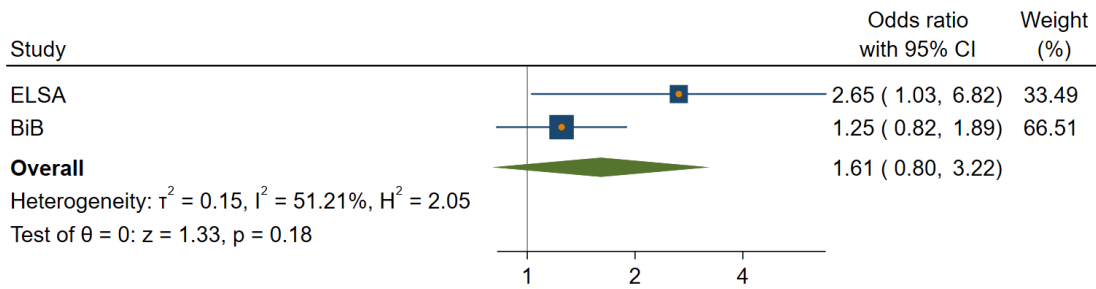

Random-effects REML model

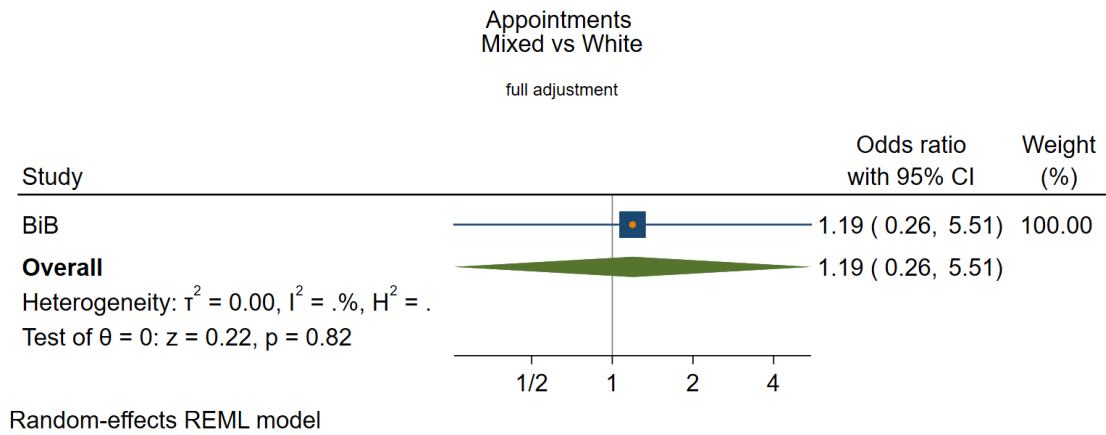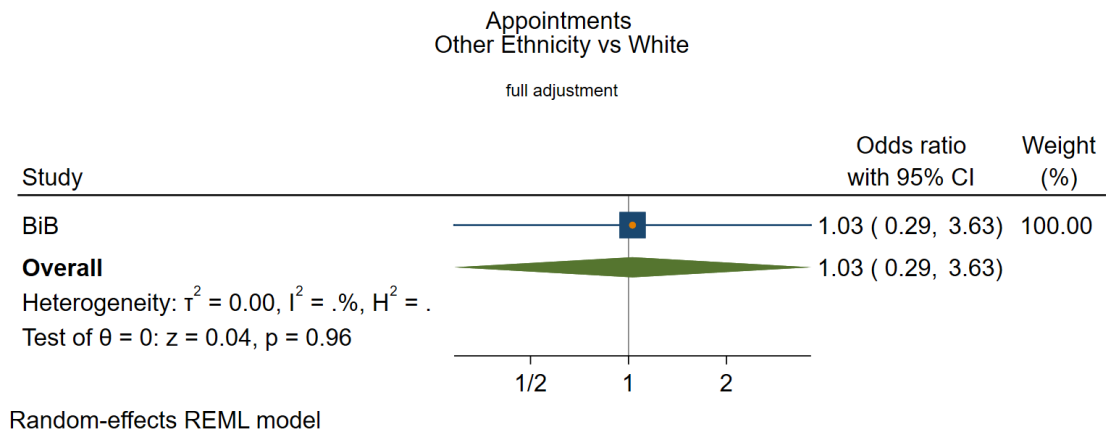

## Prescription/Medication access

Sex  
Unadjusted

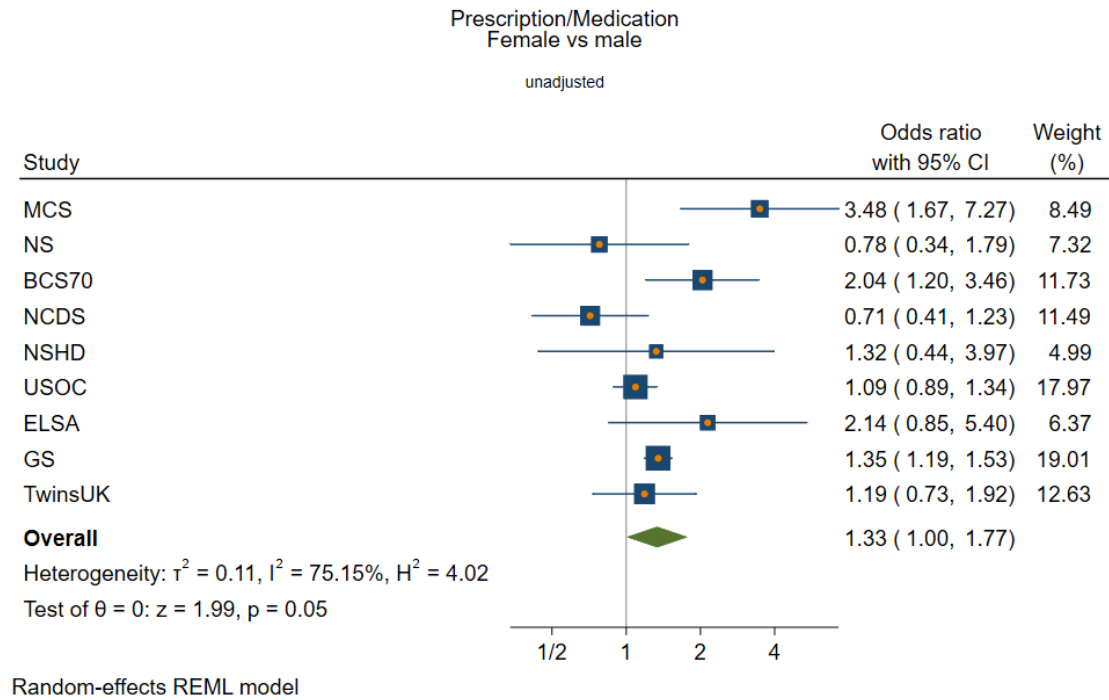

Basic adjustment

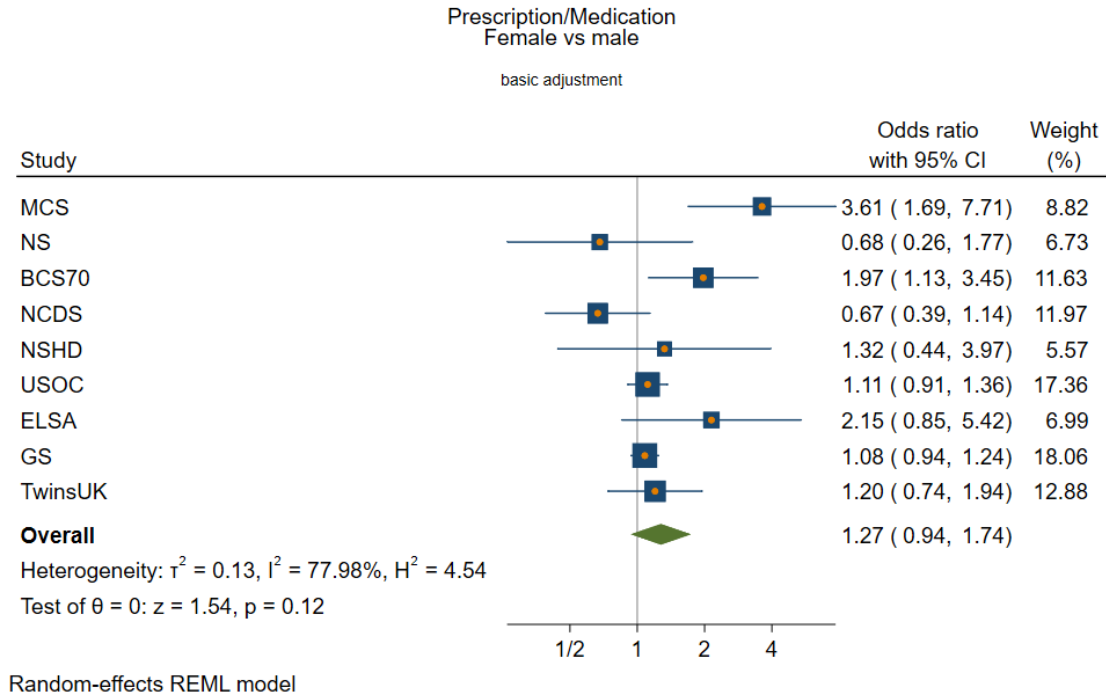

Full adjustment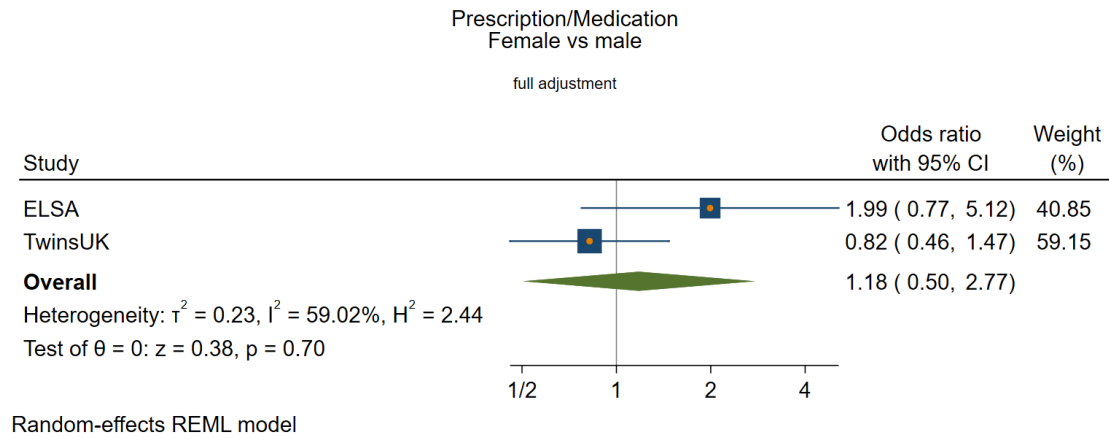

*Occupational class*  
Unadjusted

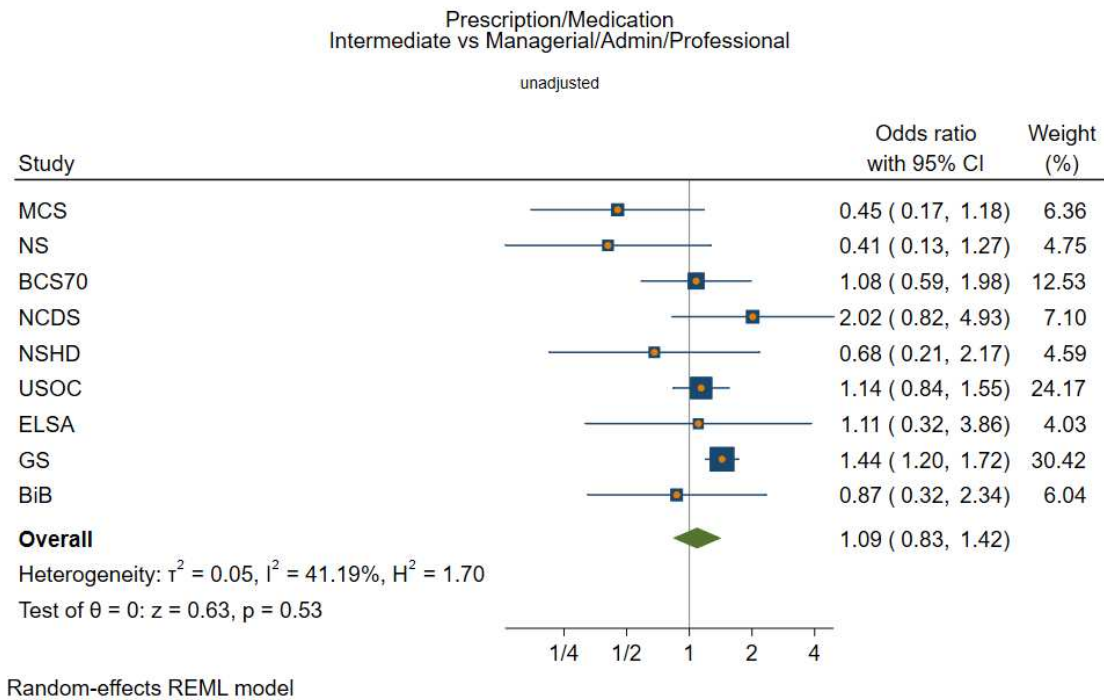

Prescription/Medication  
Manual/Routine vs Managerial/Admin/Professional

unadjusted

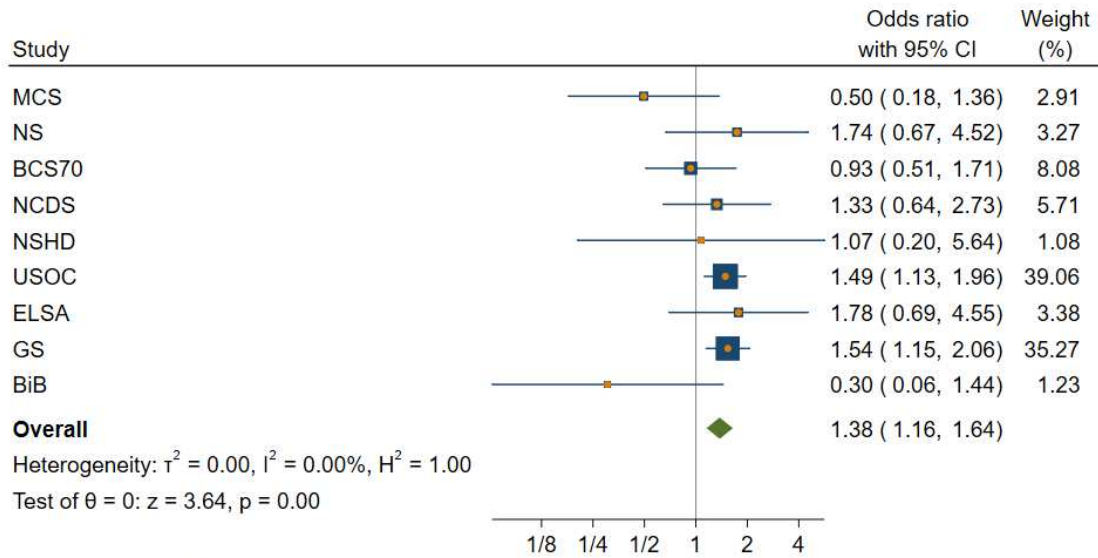

Random-effects REML model

Prescription/Medication  
Other social class vs Managerial/Admin/Professional

unadjusted

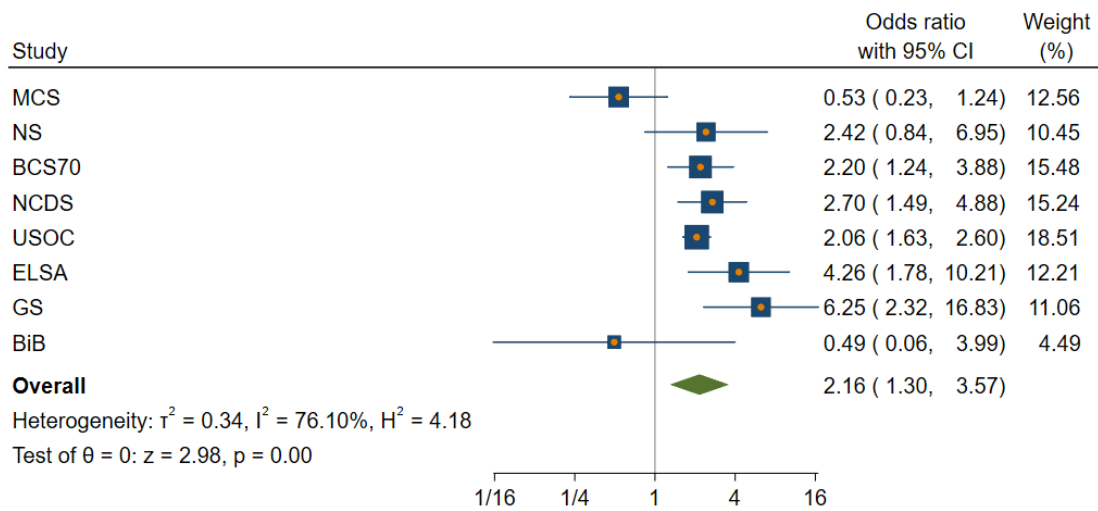

Random-effects REML model

Basic adjustment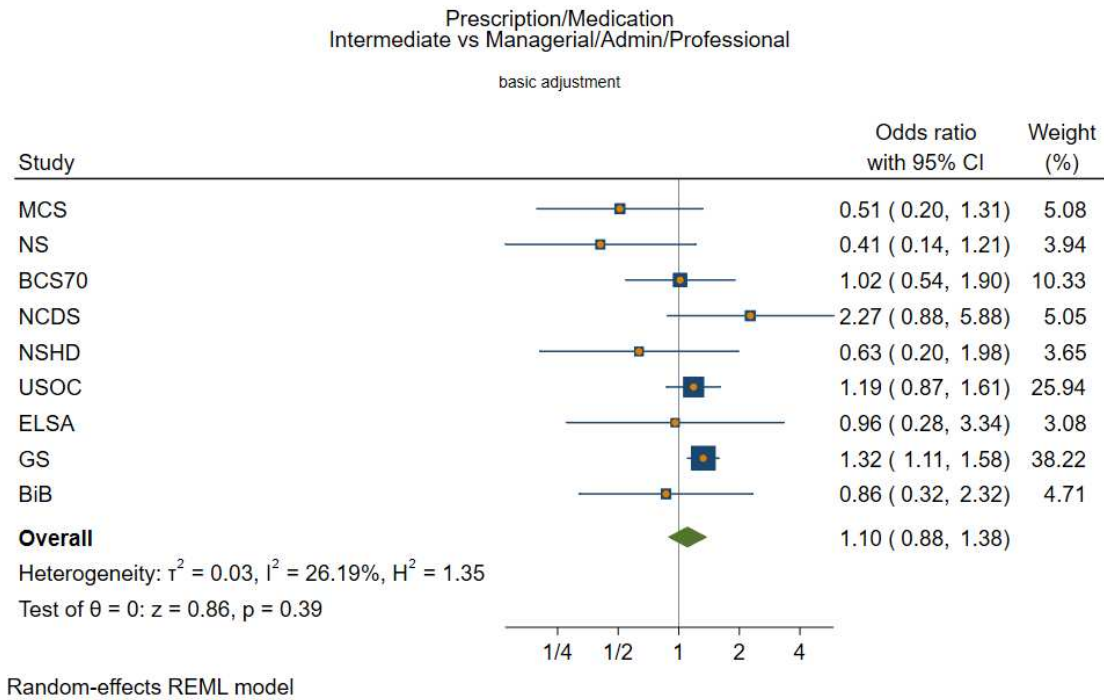



Prescription/Medication  
Manual/Routine vs Managerial/Admin/Professional

basic adjustment

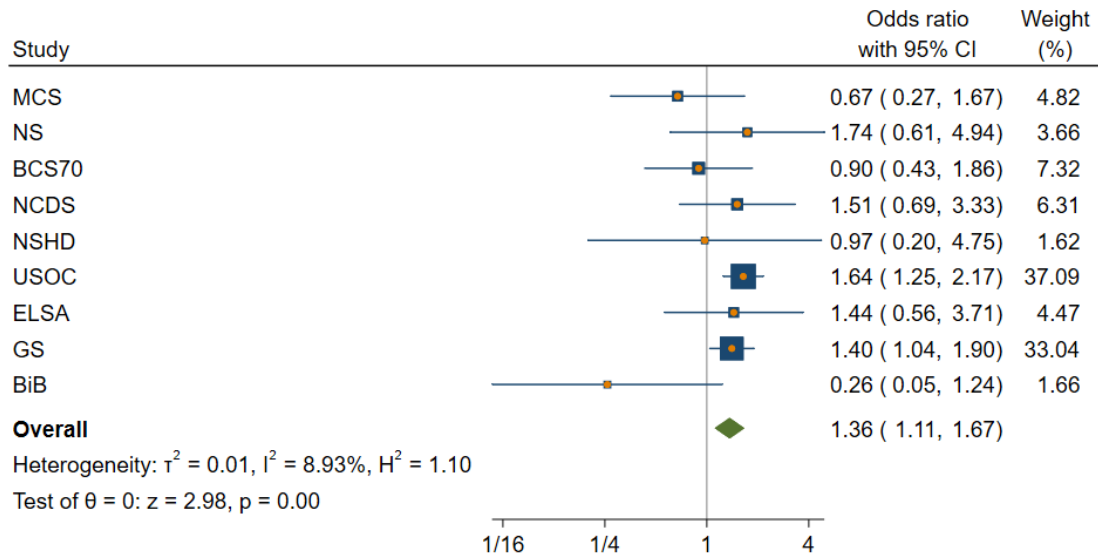

Random-effects REML model

Prescription/Medication  
Other social class vs Managerial/Admin/Professional

basic adjustment

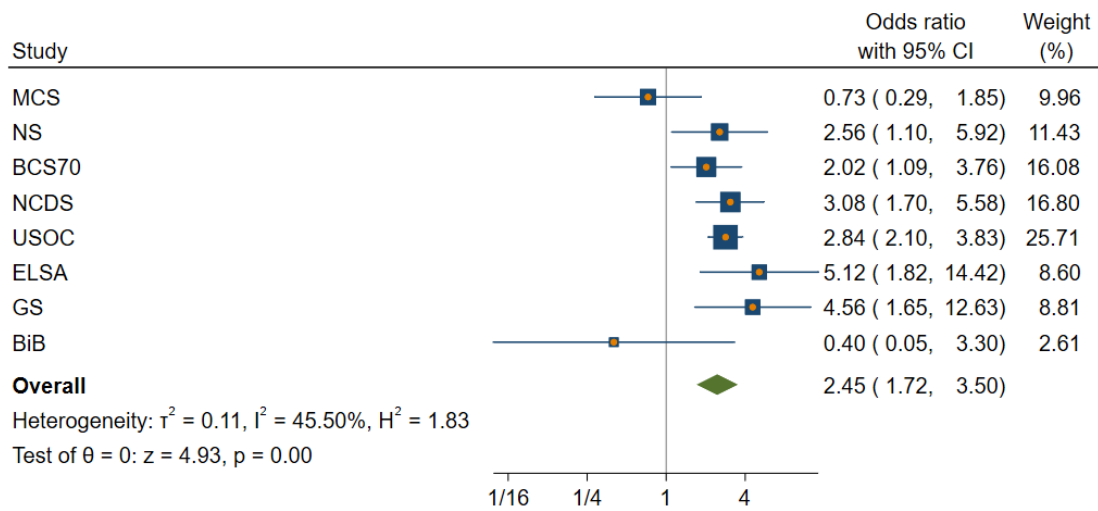

Random-effects REML model

Full adjustment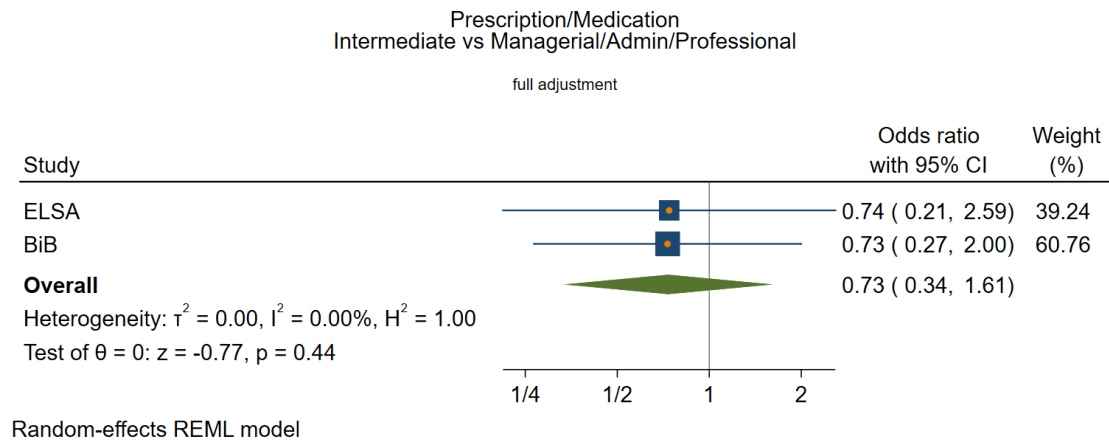

Prescription/Medication  
Manual/Routine vs Managerial/Admin/Professional

full adjustment

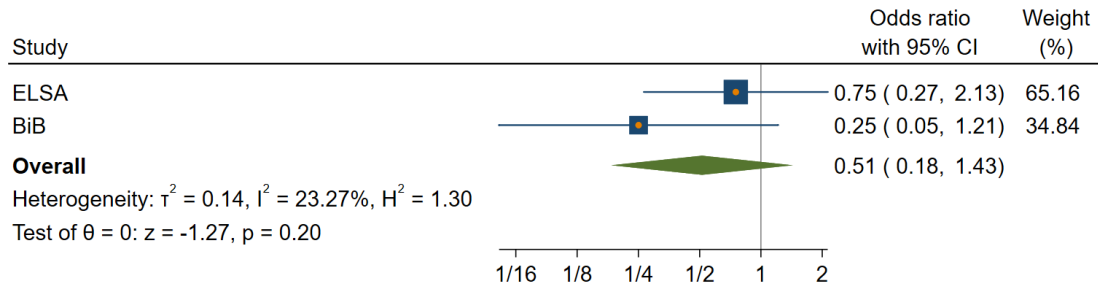

Random-effects REML model

Prescription/Medication  
Other social class vs Managerial/Admin/Professional

full adjustment

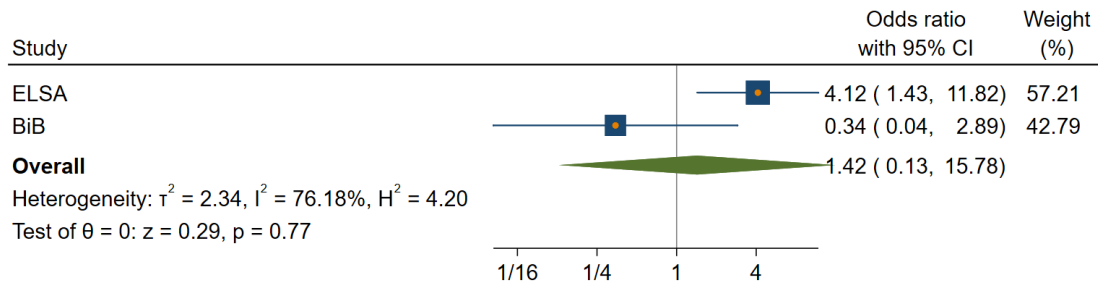

Random-effects REML model

*Education*  
Unadjusted

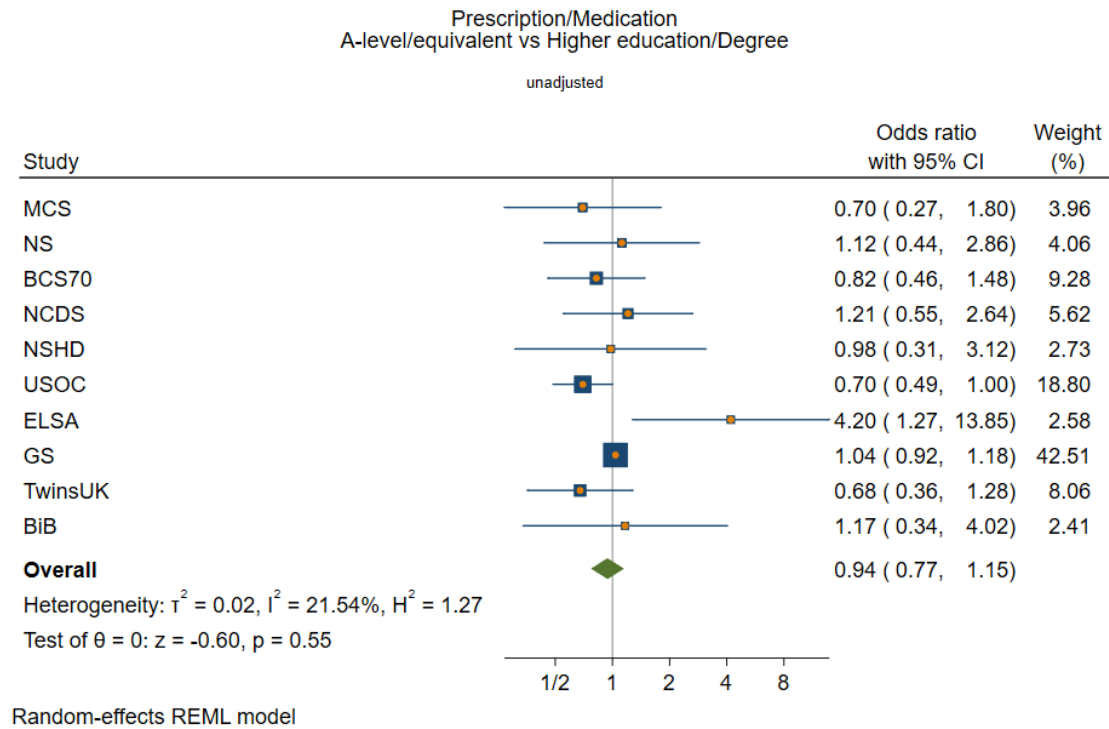

Prescription/Medication  
GCSE/equivalent vs Higher education/Degree

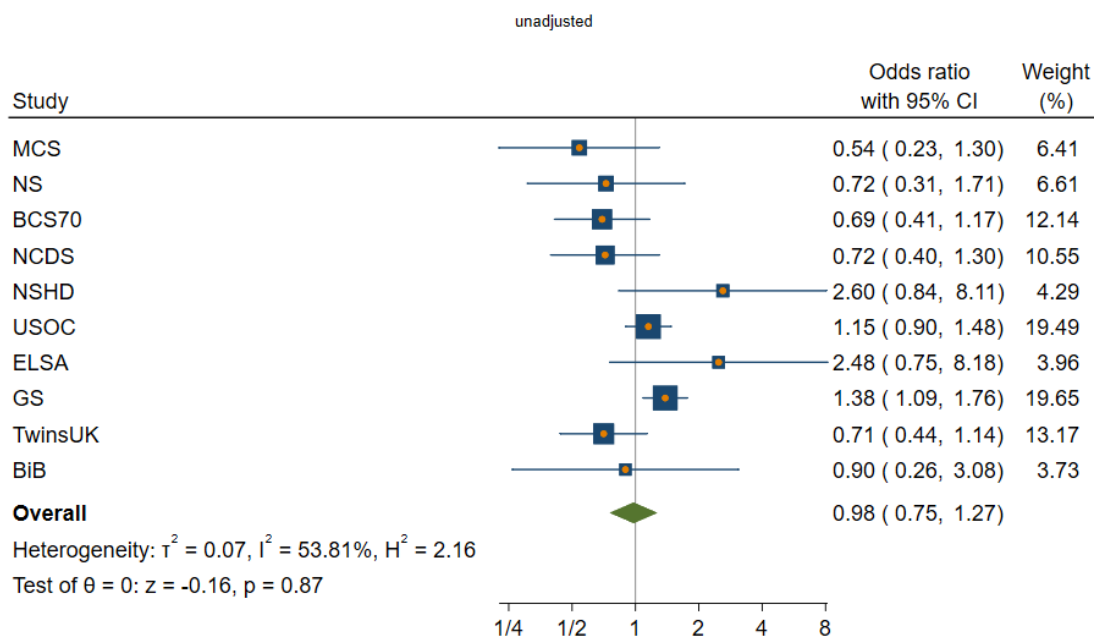

Random-effects REML model

Prescription/Medication  
<GCSE/equivalent vs Higher education/Degree

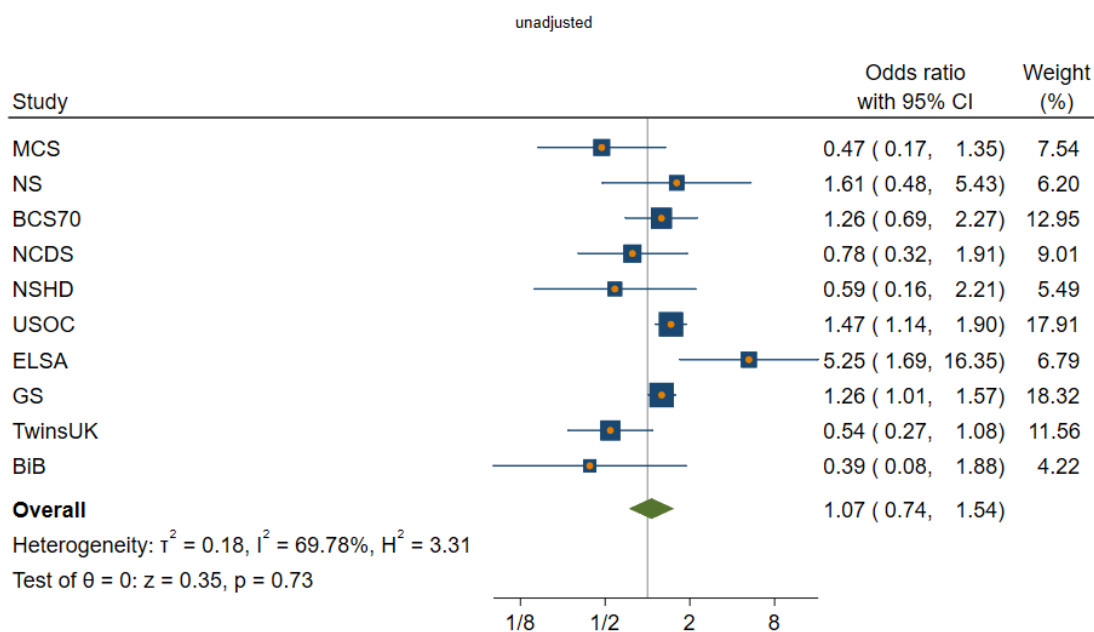

Random-effects REML model

Basic adjustment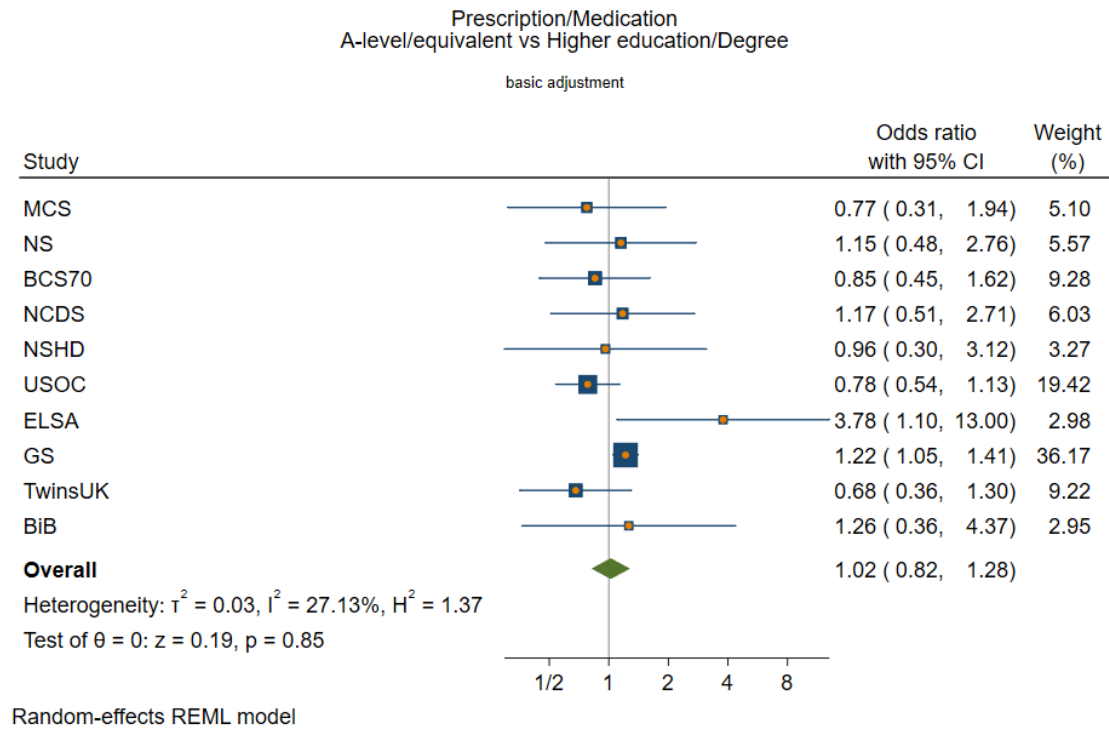

Prescription/Medication  
GCSE/equivalent vs Higher education/Degree

basic adjustment

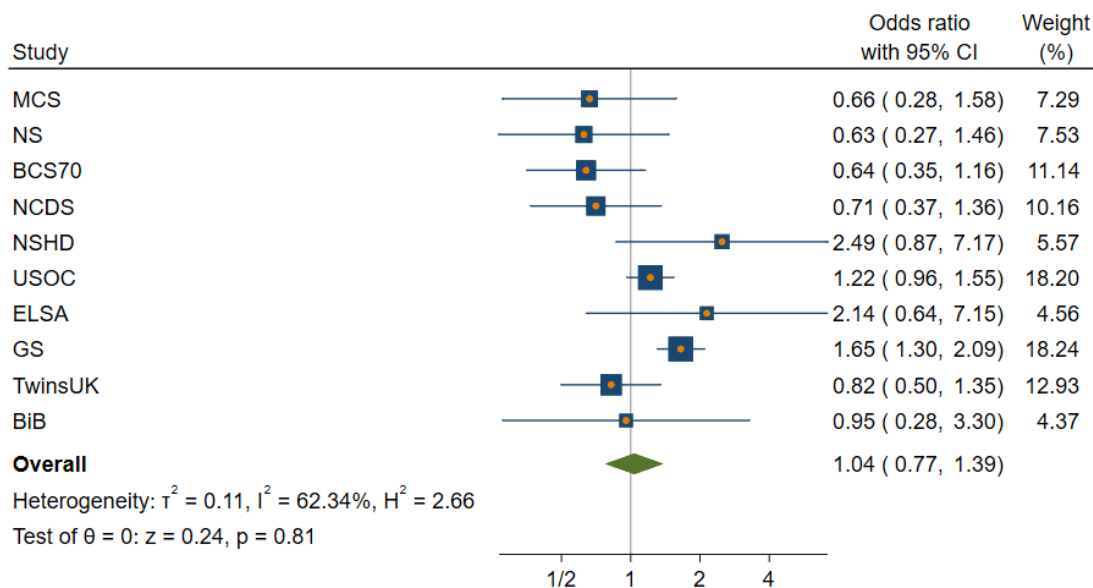

Random-effects REML model

Prescription/Medication  
<GCSE/equivalent vs Higher education/Degree

basic adjustment

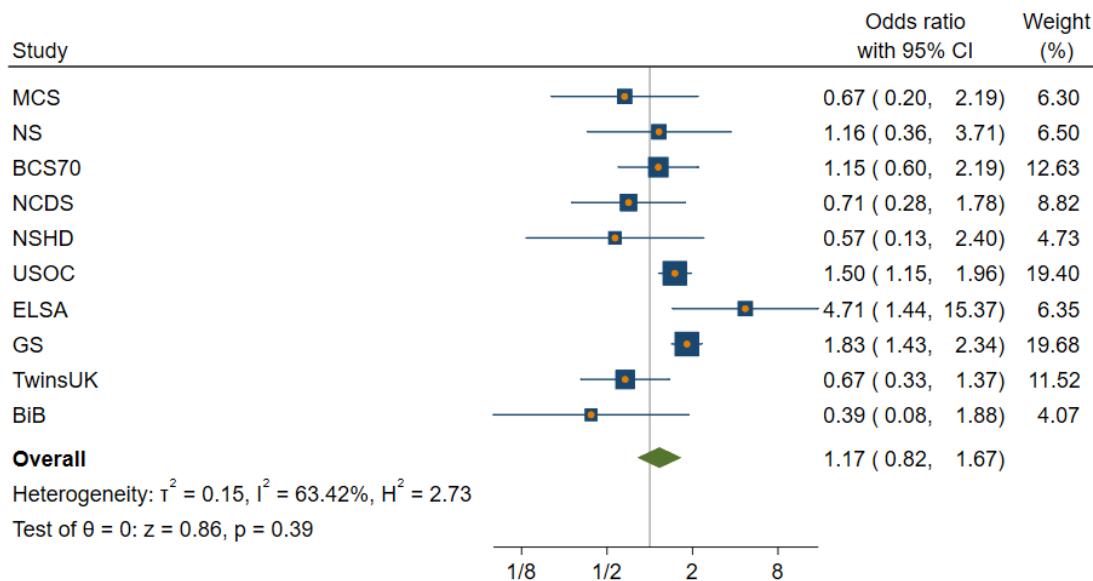

Random-effects REML model

Full adjustment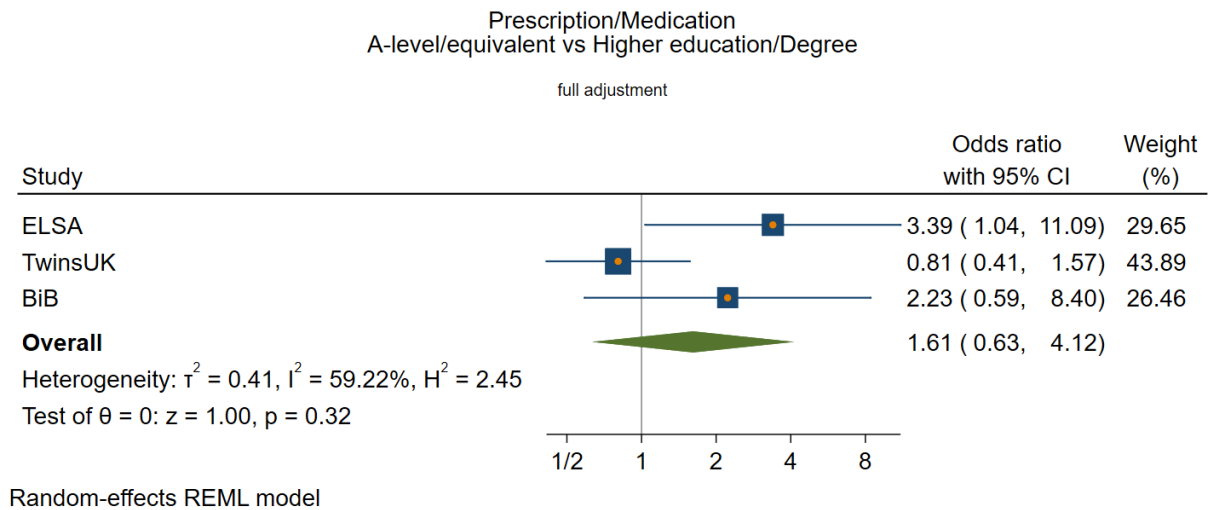



Prescription/Medication  
GCSE/equivalent vs Higher education/Degree

full adjustment

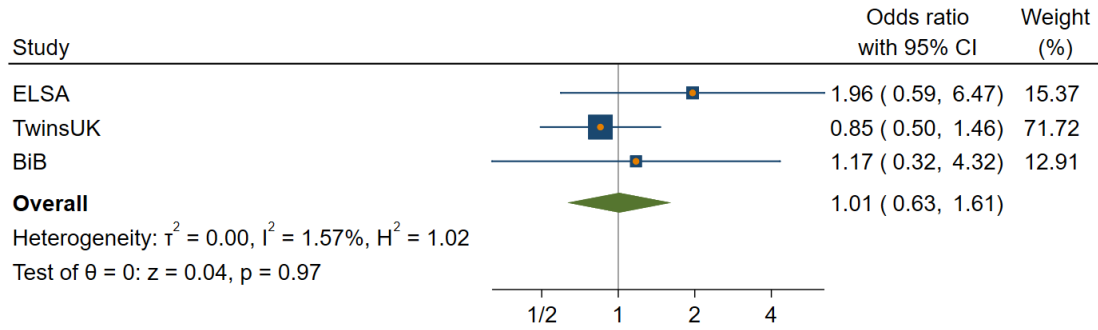

Random-effects REML model

Prescription/Medication  
<GCSE/equivalent vs Higher education/Degree

full adjustment

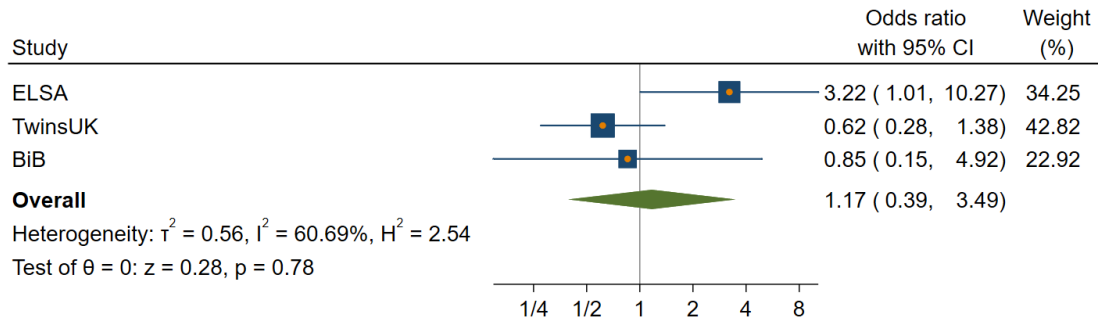

Random-effects REML model

*Age*  
Unadjusted

Prescription/Medication  
16-24y vs 45-54y

unadjusted

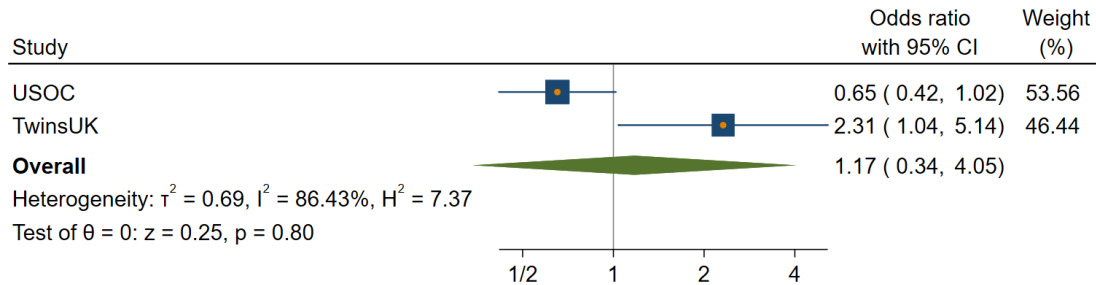

Random-effects REML model

Prescription/Medication  
25-34y vs 45-54y

unadjusted

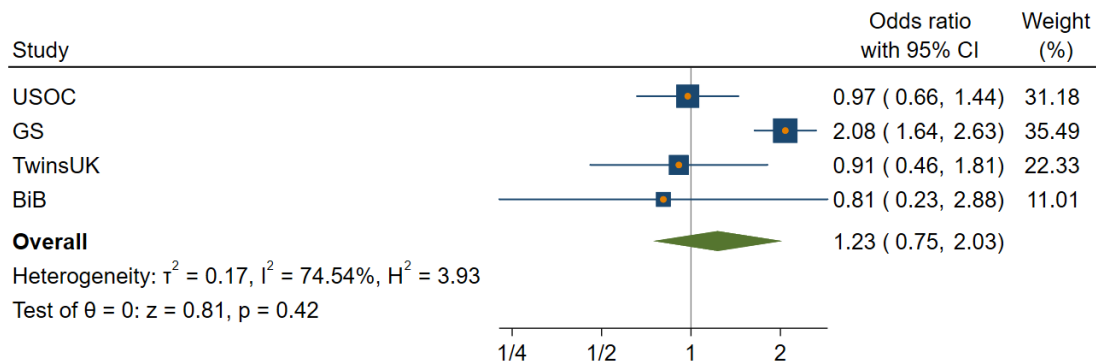

Random-effects REML model

Prescription/Medication  
35-44y vs 45-54y

unadjusted

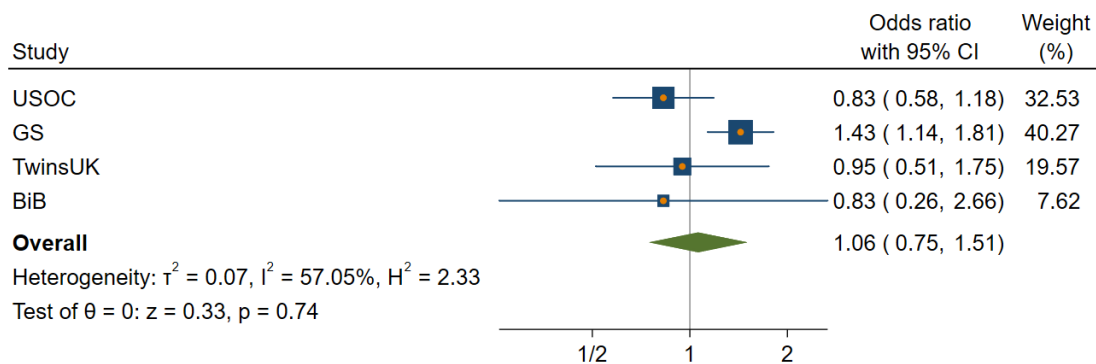

Random-effects REML model

Prescription/Medication  
55-64y vs 45-54y

unadjusted

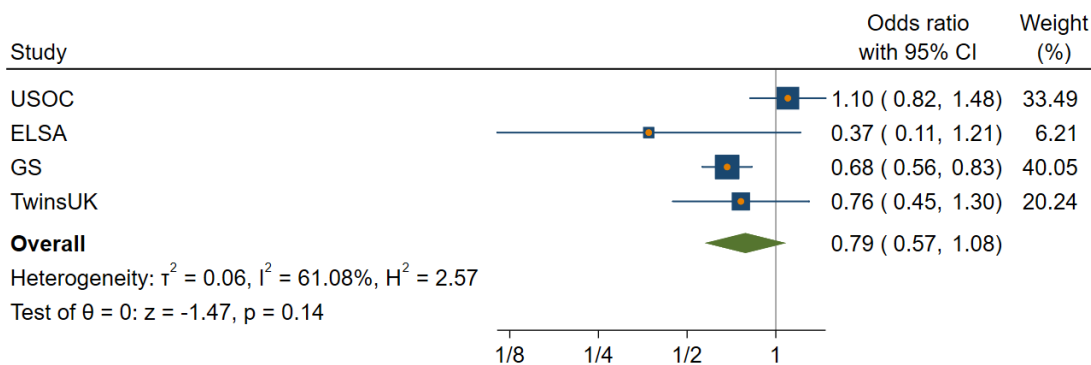

Random-effects REML model

Prescription/Medication  
65-74y vs 45-54y

unadjusted

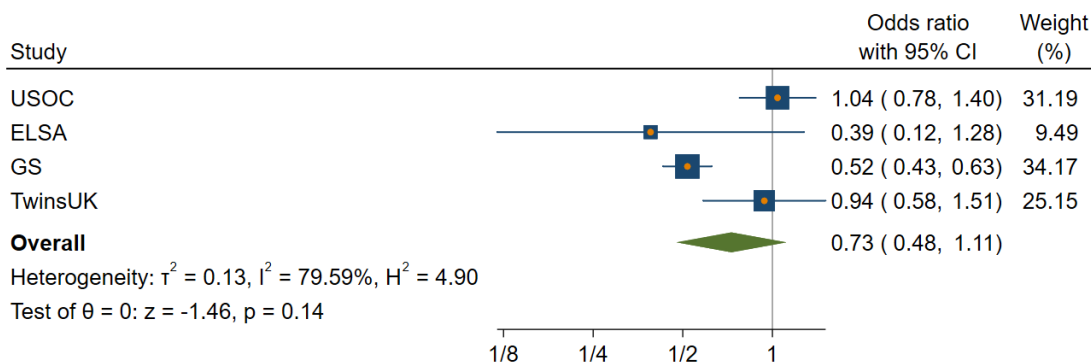

Random-effects REML model

Prescription/Medication  
75y+ vs 45-54y

unadjusted

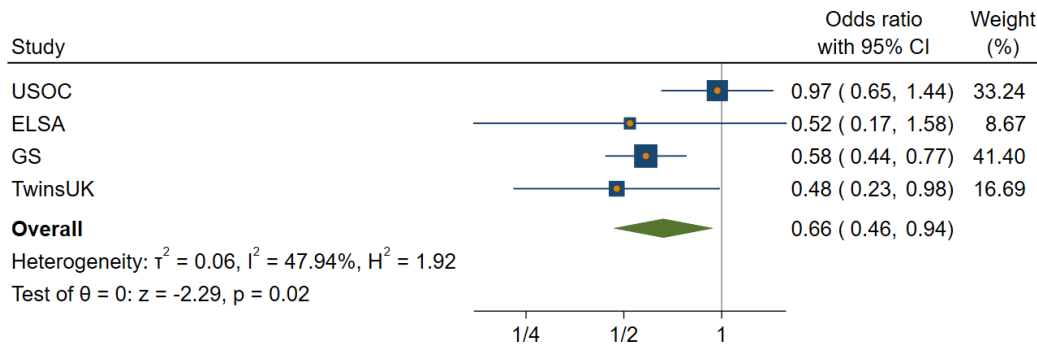

Random-effects REML model

Basic adjustment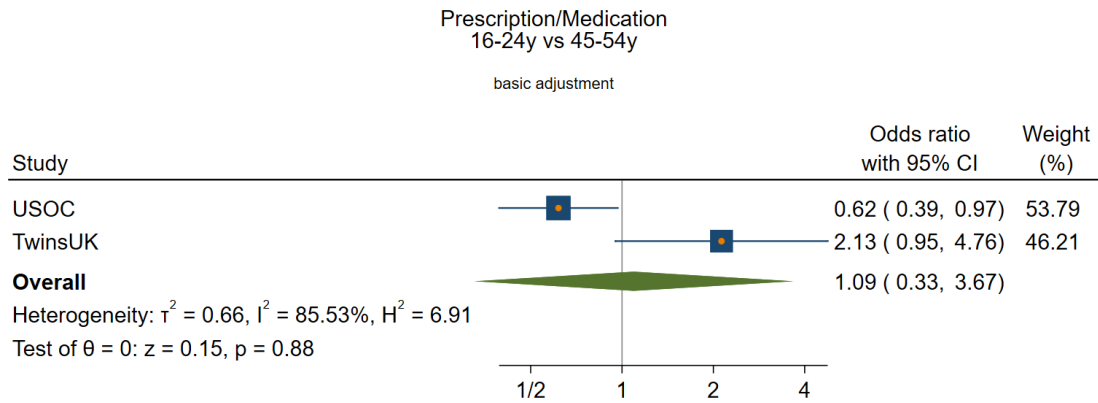

Random-effects REML model

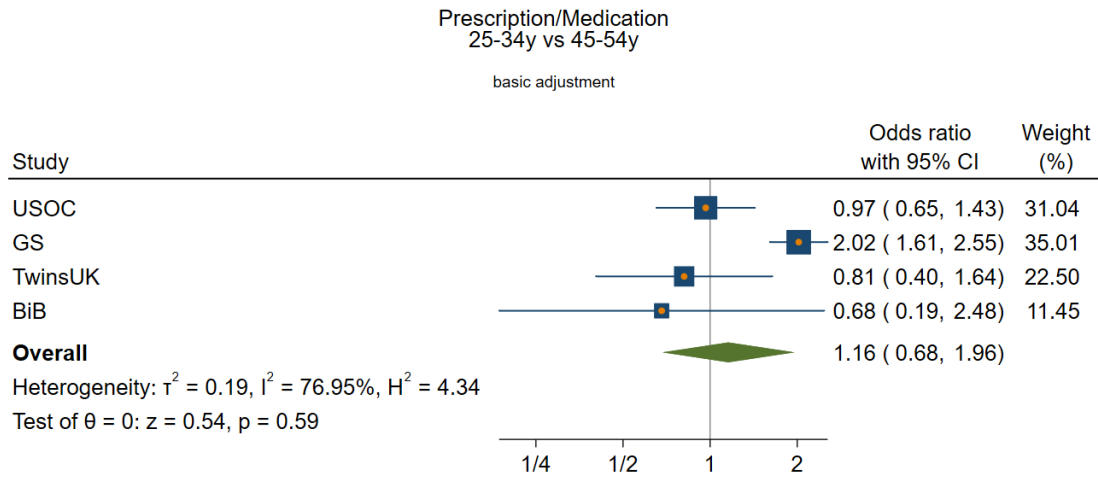

Random-effects REML model

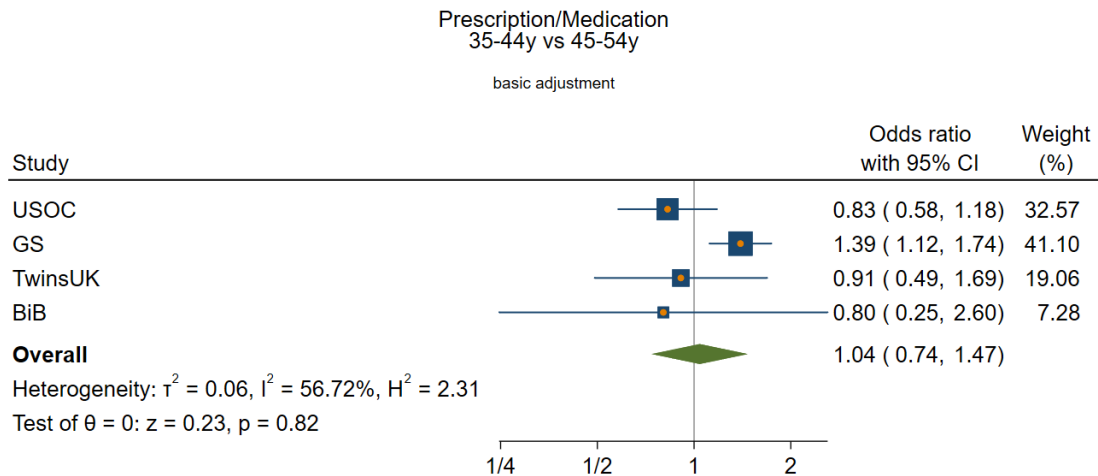

Random-effects REML model

Prescription/Medication  
55-64y vs 45-54y

basic adjustment

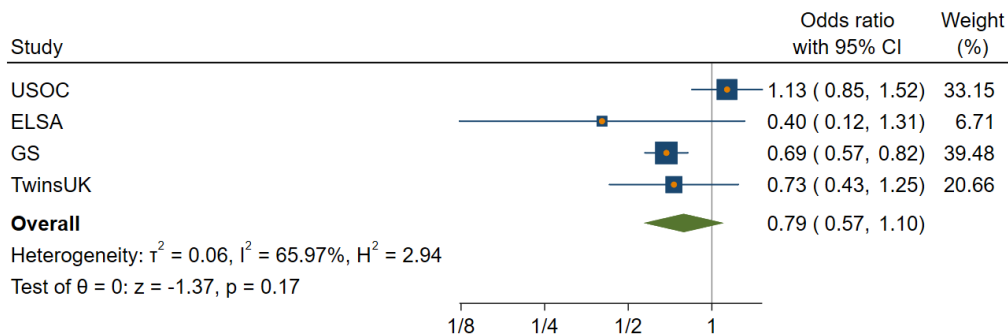

Random-effects REML model

Prescription/Medication  
65-74y vs 45-54y

basic adjustment

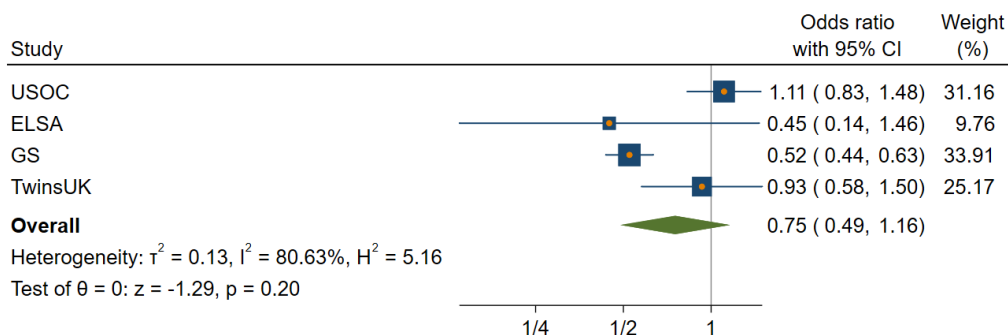

Random-effects REML model

Prescription/Medication  
75y+ vs 45-54y

basic adjustment

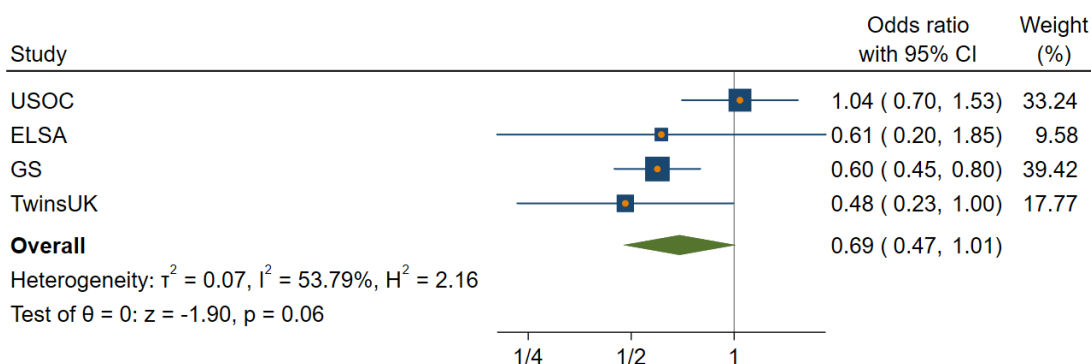

Random-effects REML model

Full adjustment

Prescription/Medication  
16-24y vs 45-54y

full adjustment

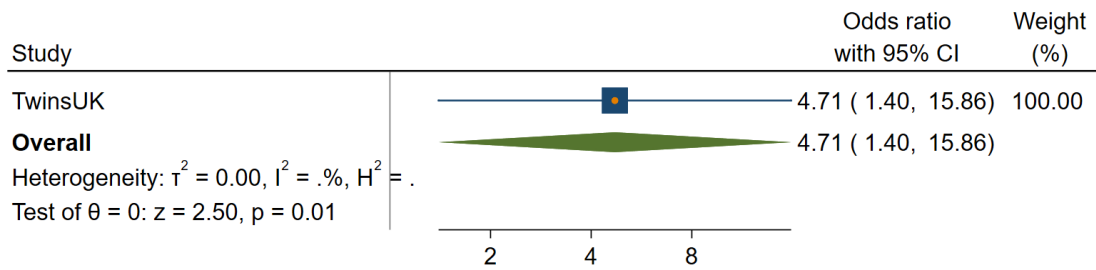

Random-effects REML model

Prescription/Medication  
25-34y vs 45-54y

full adjustment

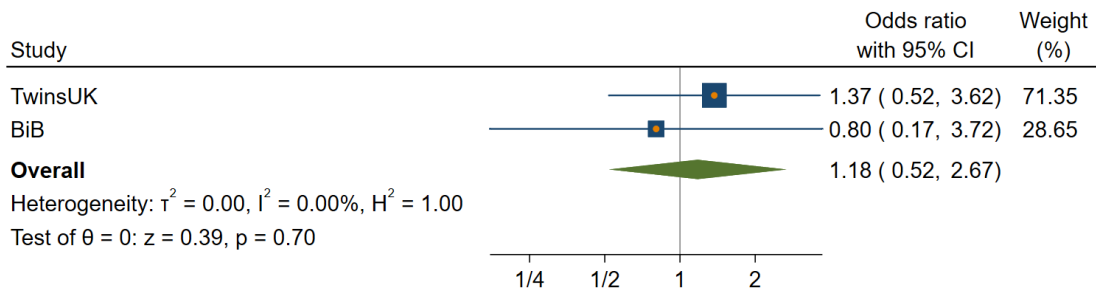

Random-effects REML model

Prescription/Medication  
35-44y vs 45-54y

full adjustment

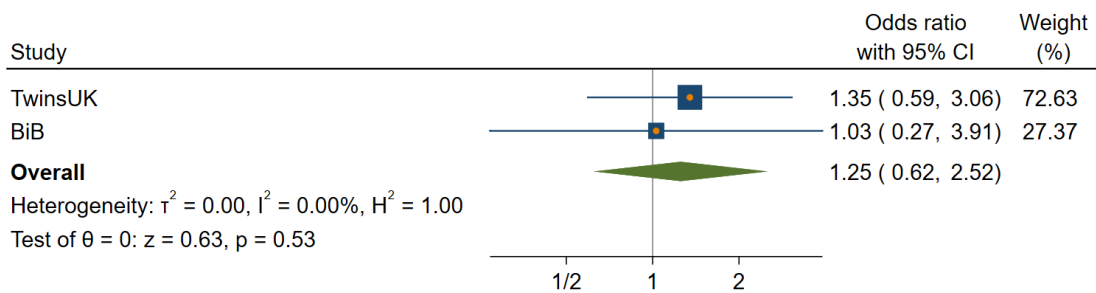

Random-effects REML model

Prescription/Medication  
55-64y vs 45-54y

full adjustment

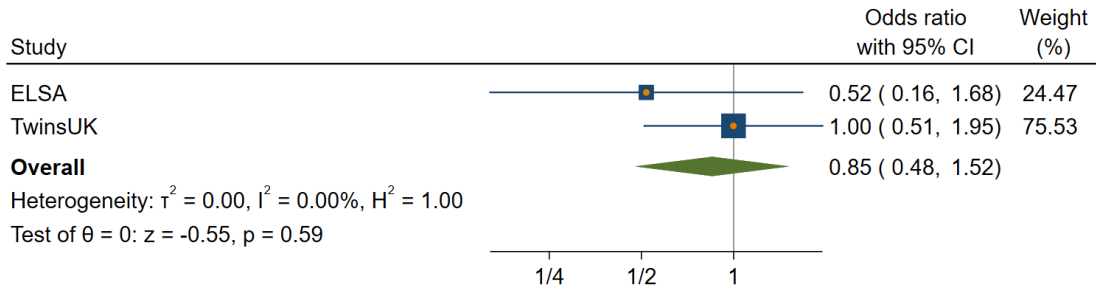

Random-effects REML model

Prescription/Medication  
65-74y vs 45-54y

full adjustment

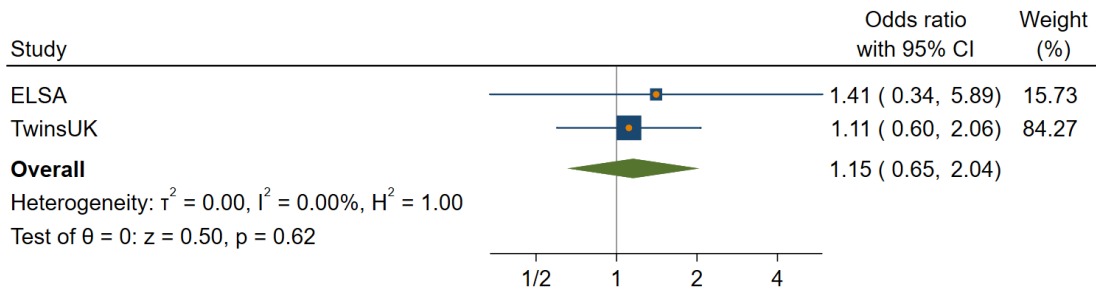

Random-effects REML model

Prescription/Medication  
75y+ vs 45-54y

full adjustment

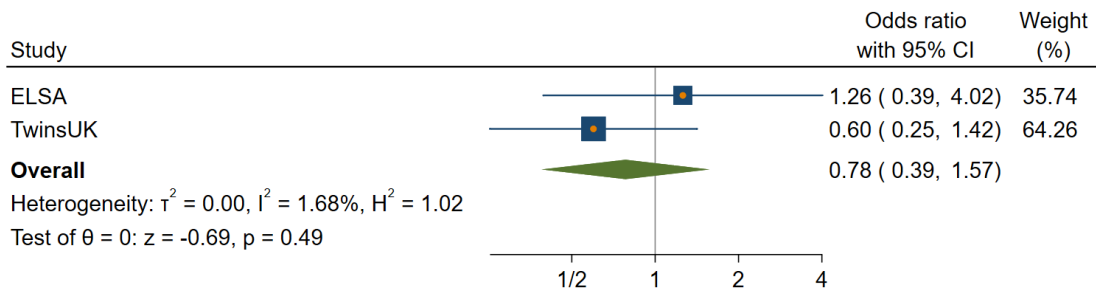

Random-effects REML model



*Ethnicity*  
Unadjusted

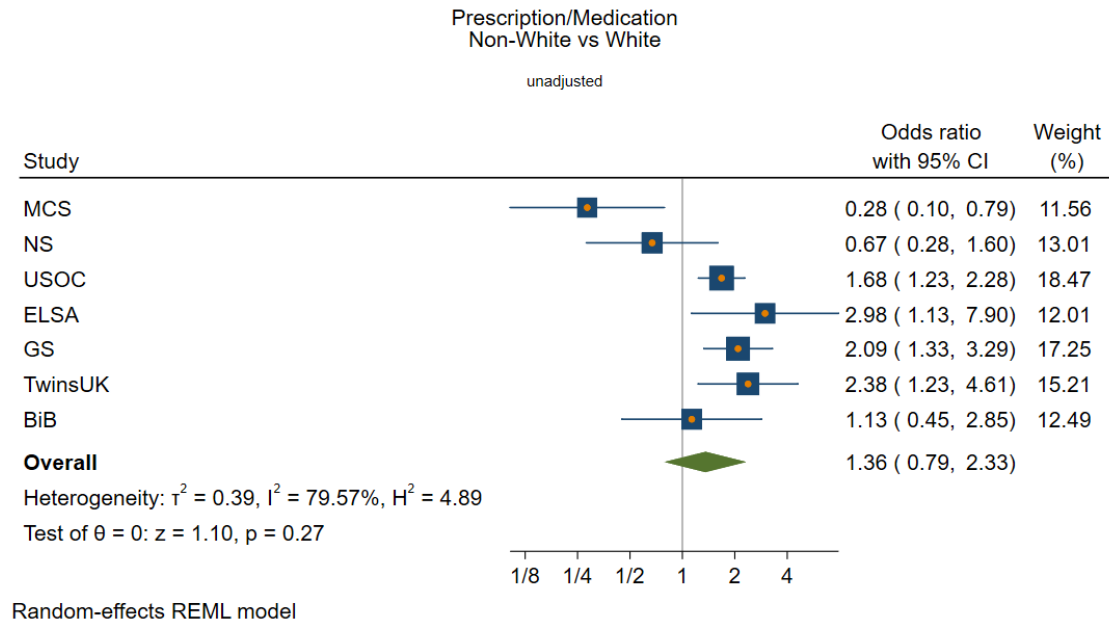

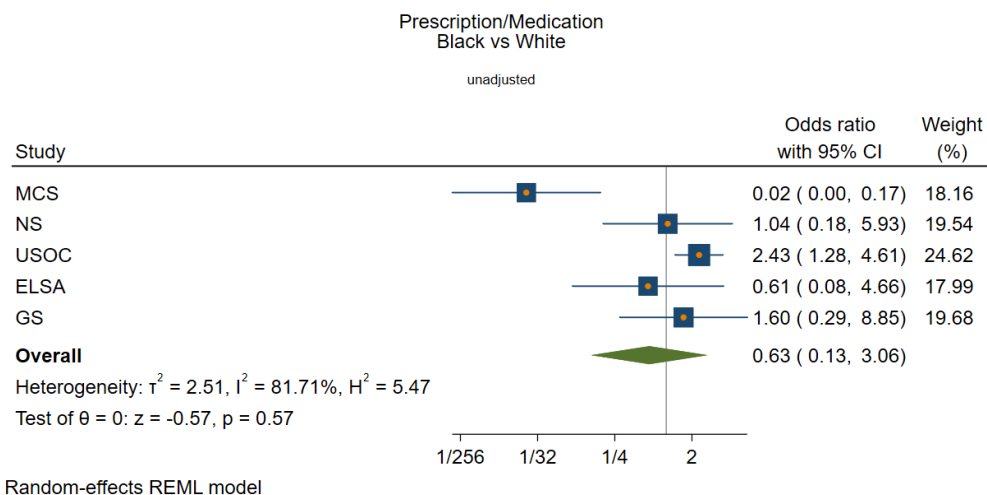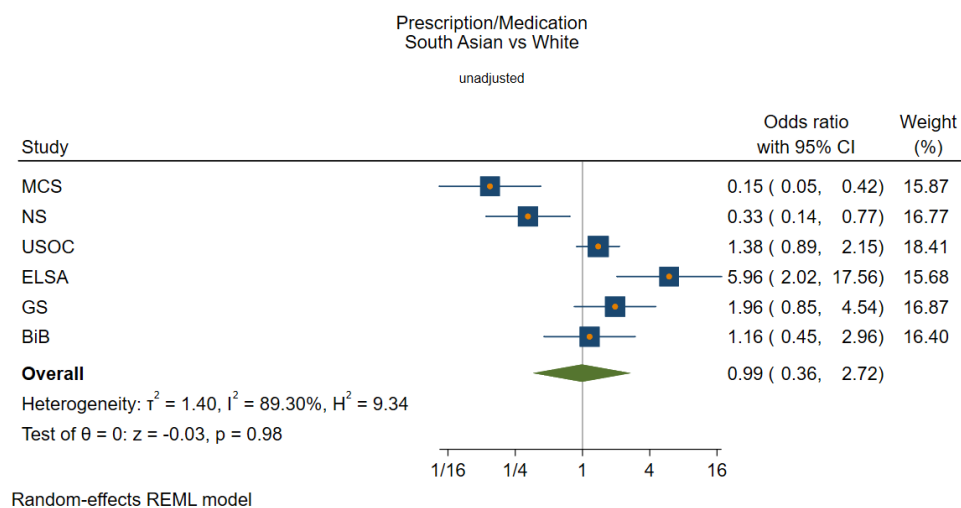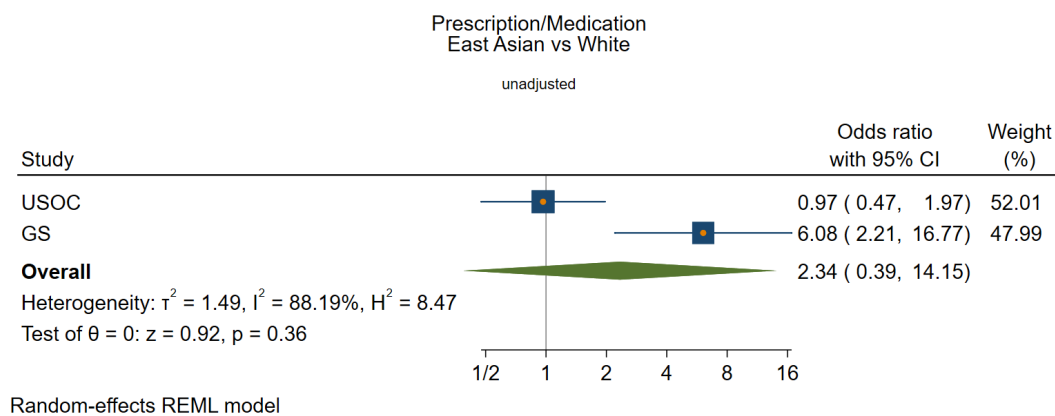

Prescription/Medication  
Mixed vs White

unadjusted

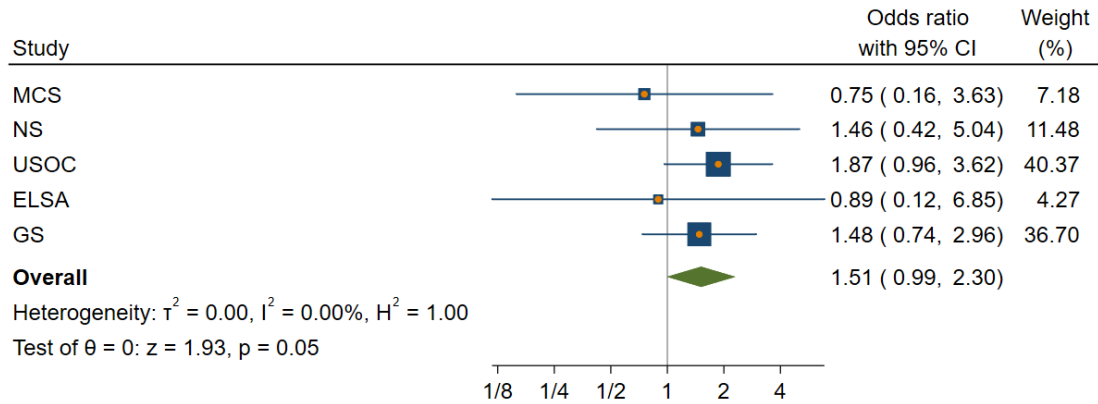

Random-effects REML model

Prescription/Medication  
Other Ethnicity vs White

unadjusted

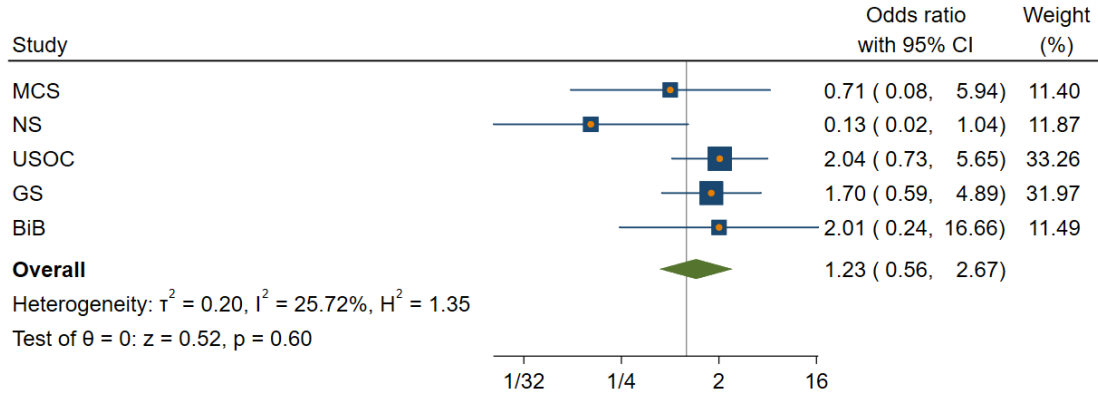

Random-effects REML model

Basic adjustment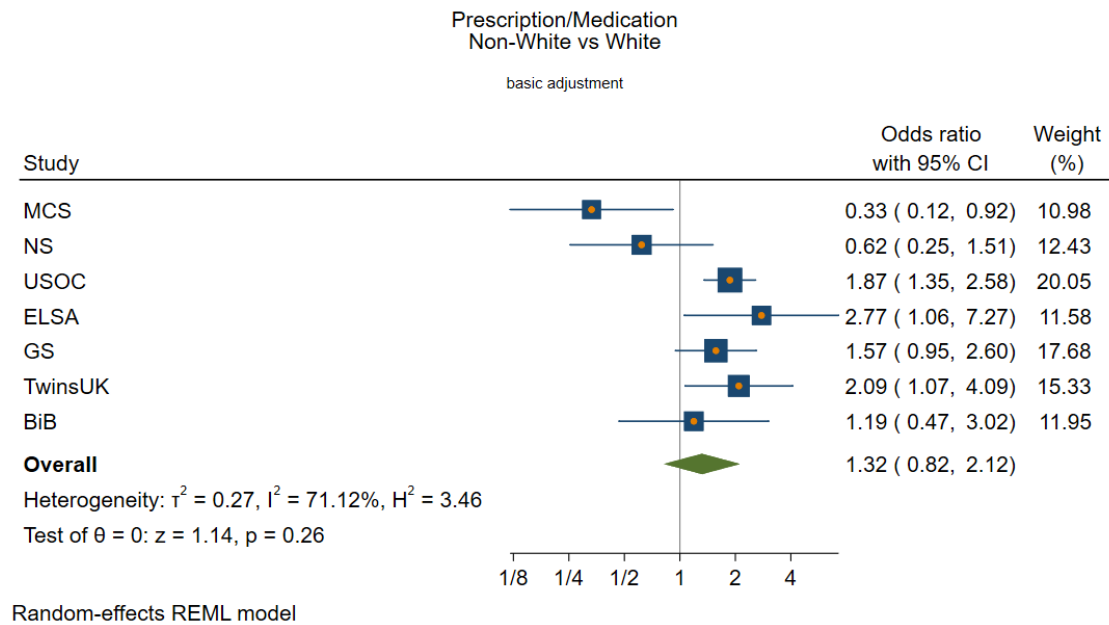

Prescription/Medication  
Black vs White

basic adjustment

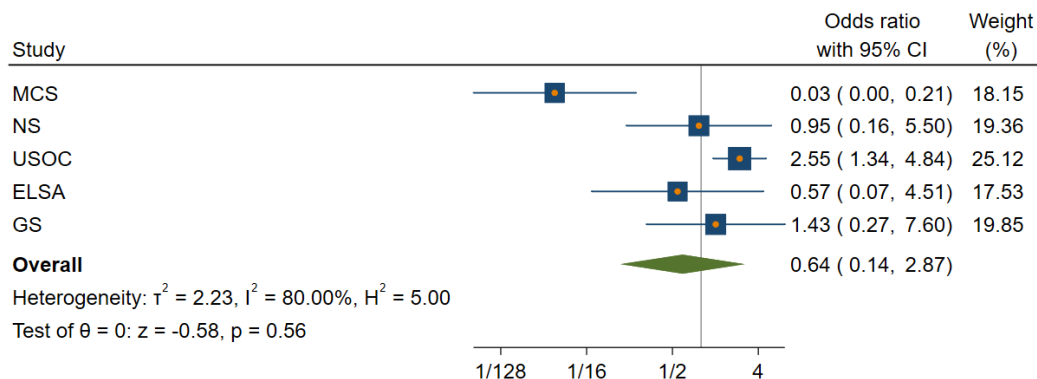

Random-effects REML model

Prescription/Medication  
South Asian vs White

basic adjustment

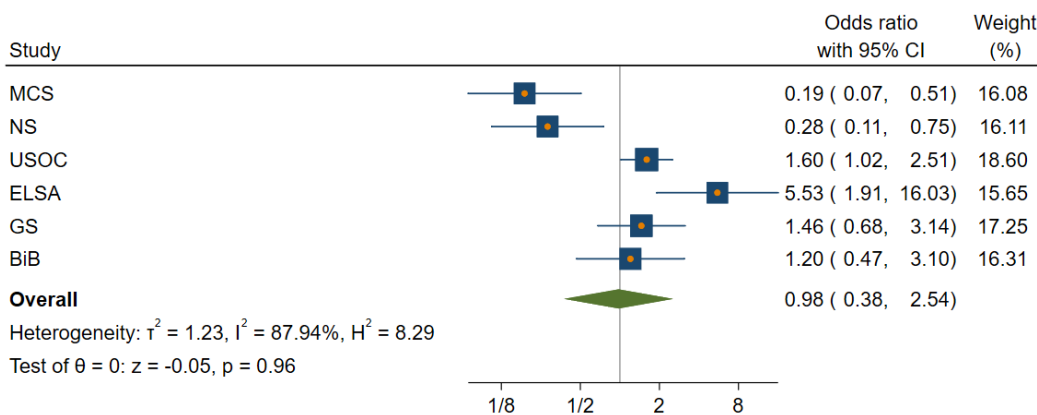

Random-effects REML model

Prescription/Medication  
East Asian vs White

basic adjustment

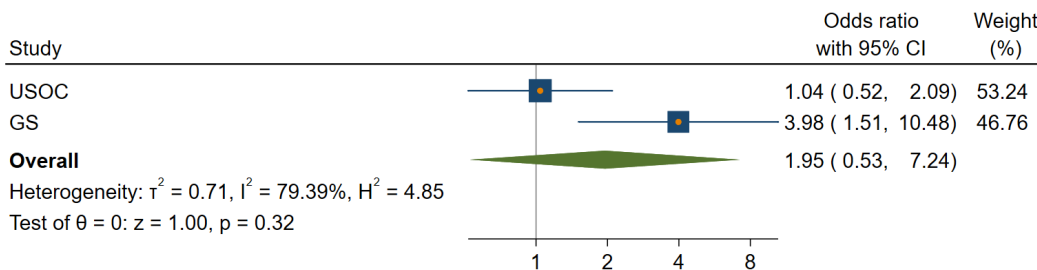

Random-effects REML model

Prescription/Medication  
Mixed vs White

basic adjustment

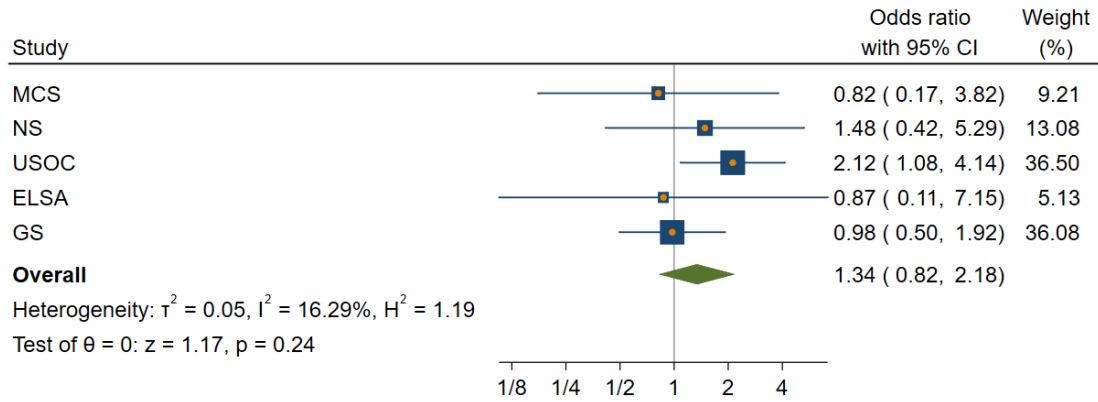

Random-effects REML model

Prescription/Medication  
Other Ethnicity vs White

basic adjustment

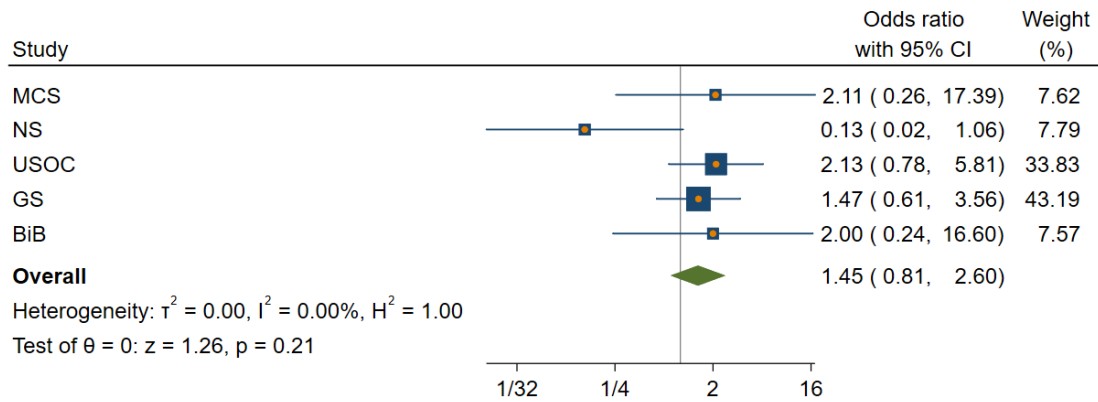

Random-effects REML model

Full adjustment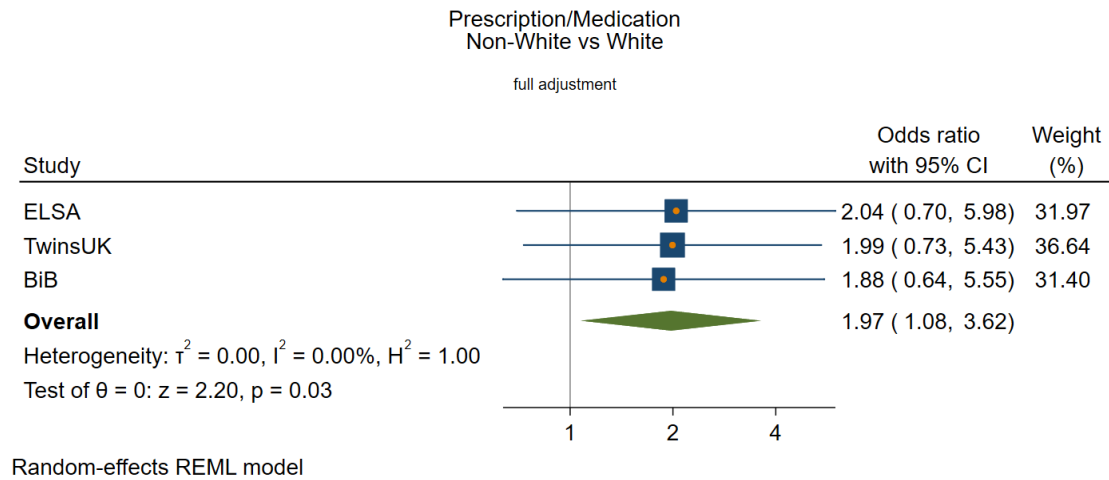

Prescription/Medication  
Black vs White

full adjustment

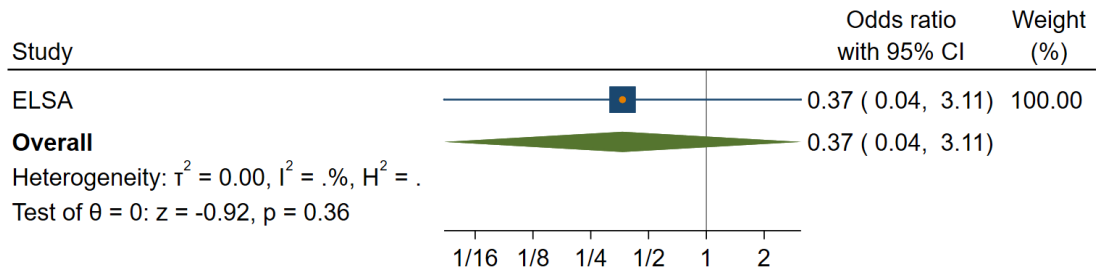

Random-effects REML model

Prescription/Medication  
South Asian vs White

full adjustment

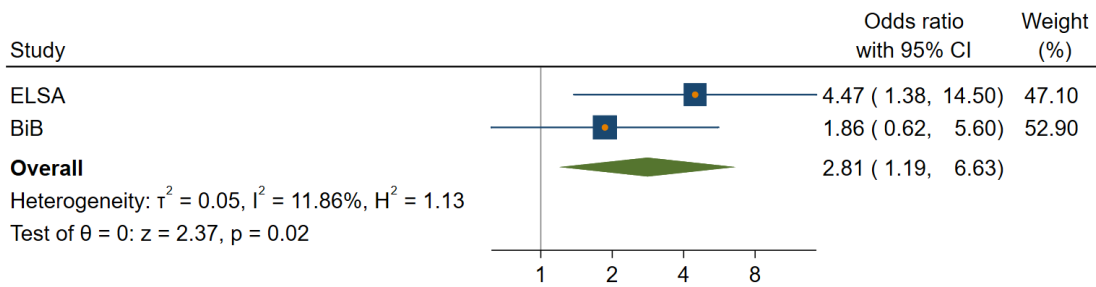

Random-effects REML model



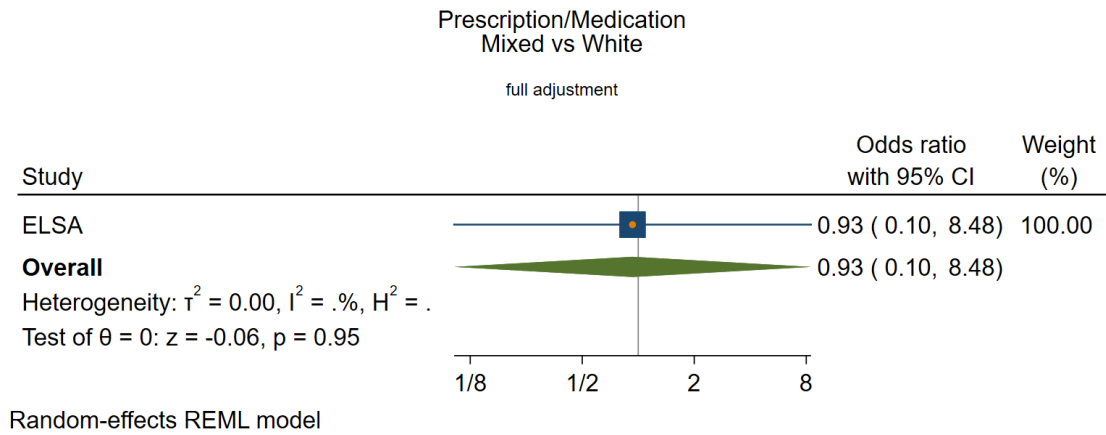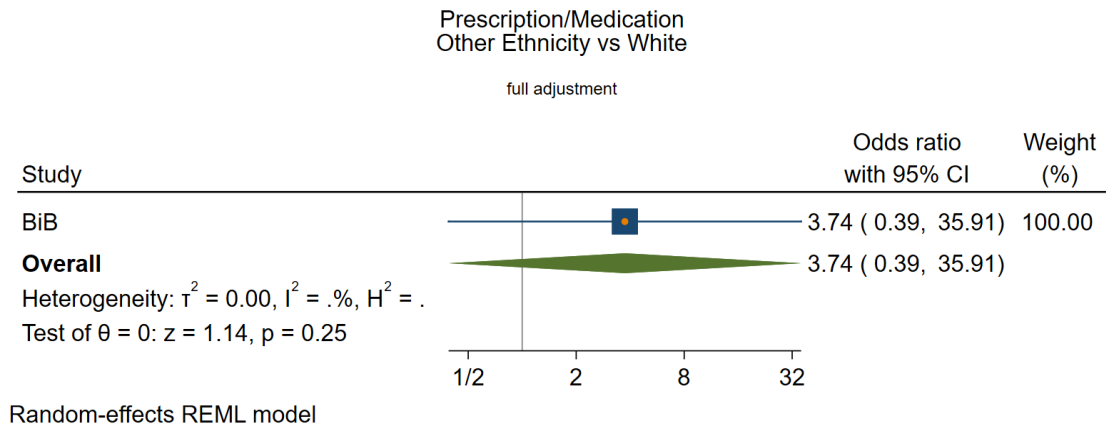

## Procedures/surgery

Sex  
Unadjusted

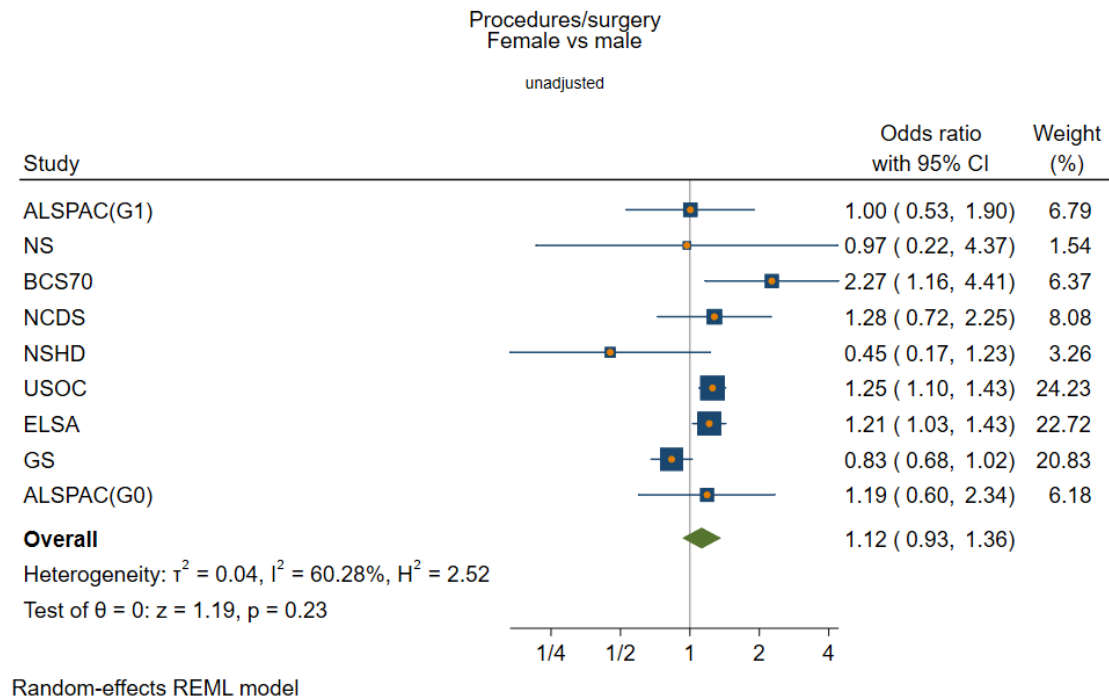

Basic adjustment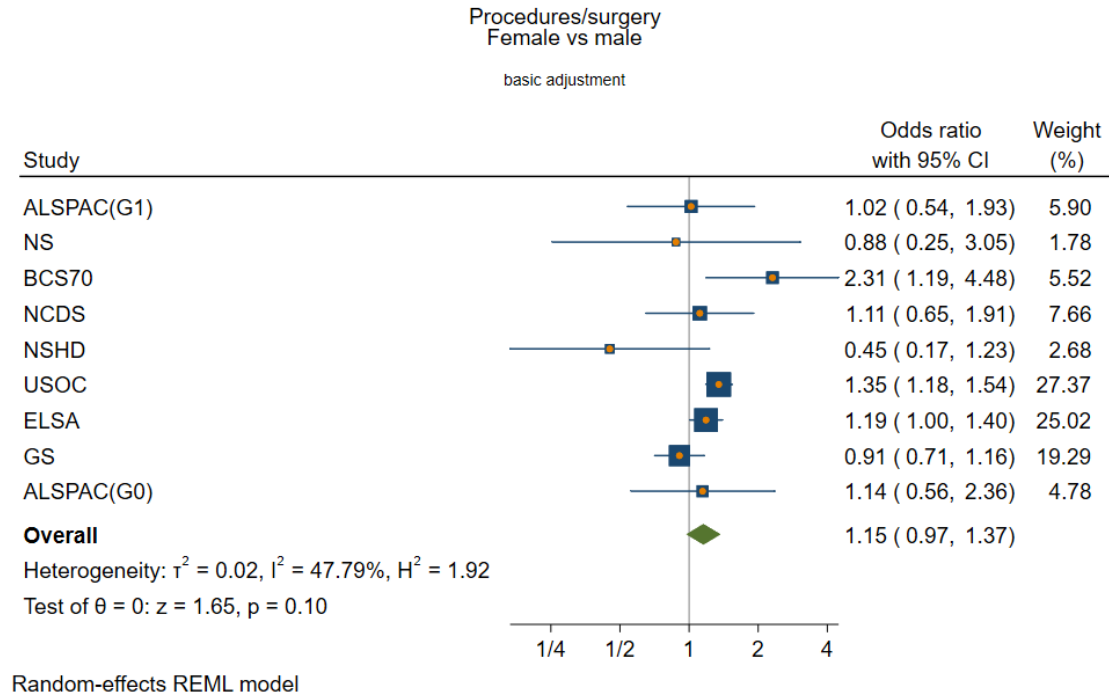

Full adjustment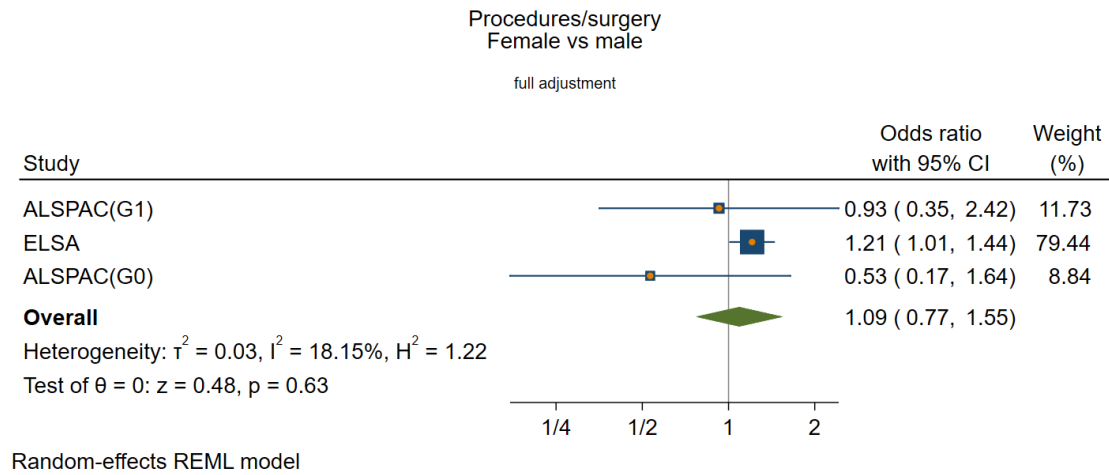

*Occupational class*  
Unadjusted

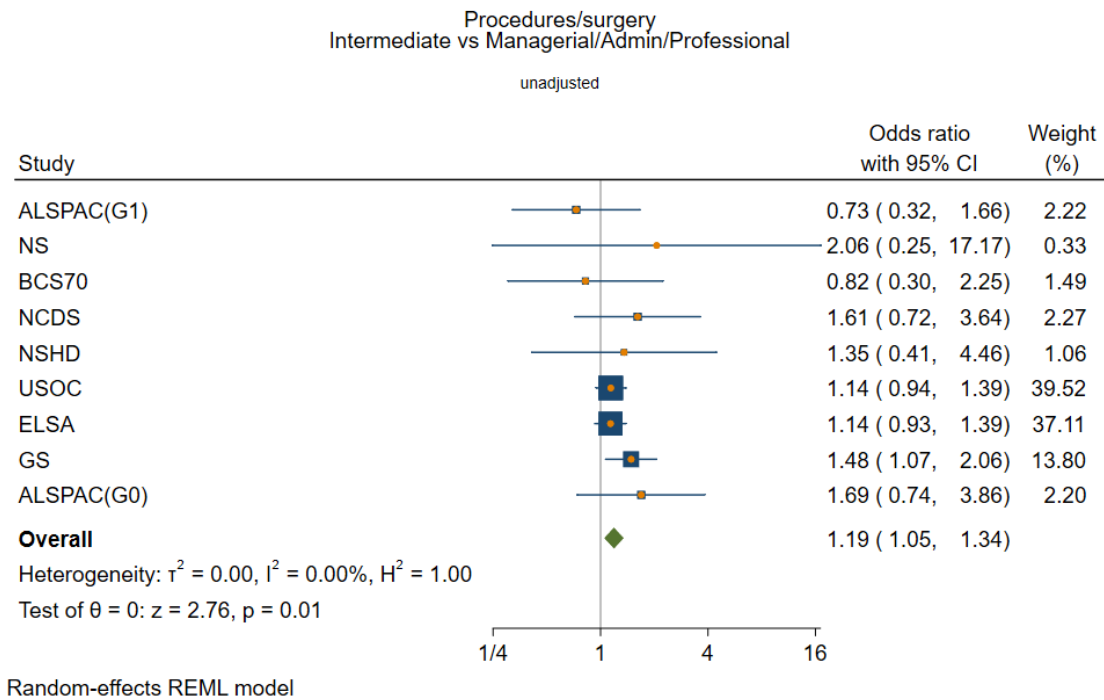

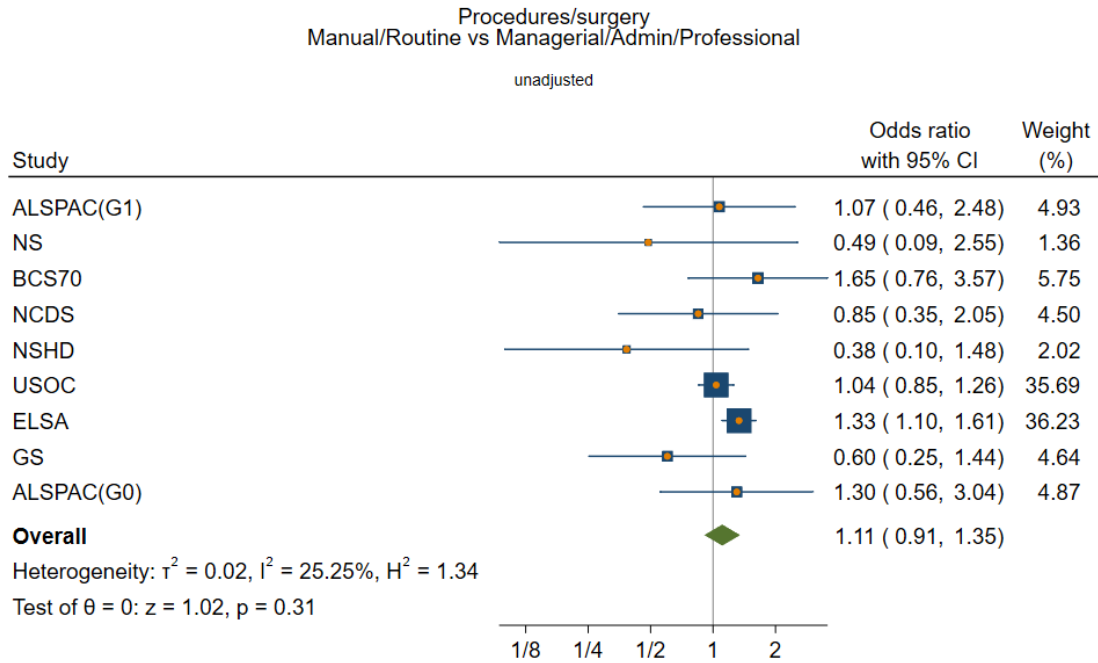

Random-effects REML model

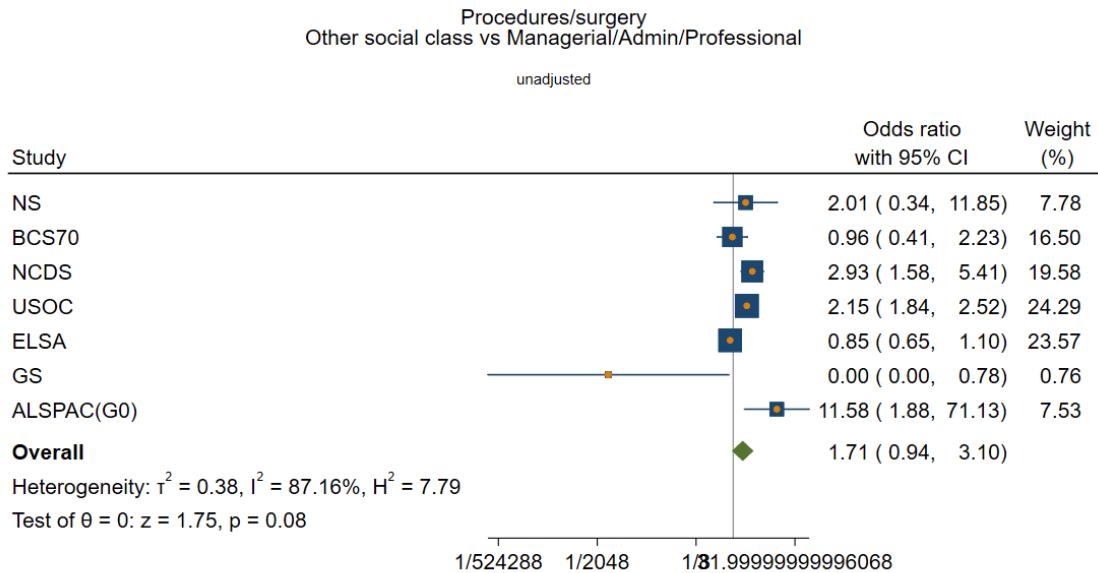

Random-effects REML model

Basic adjustment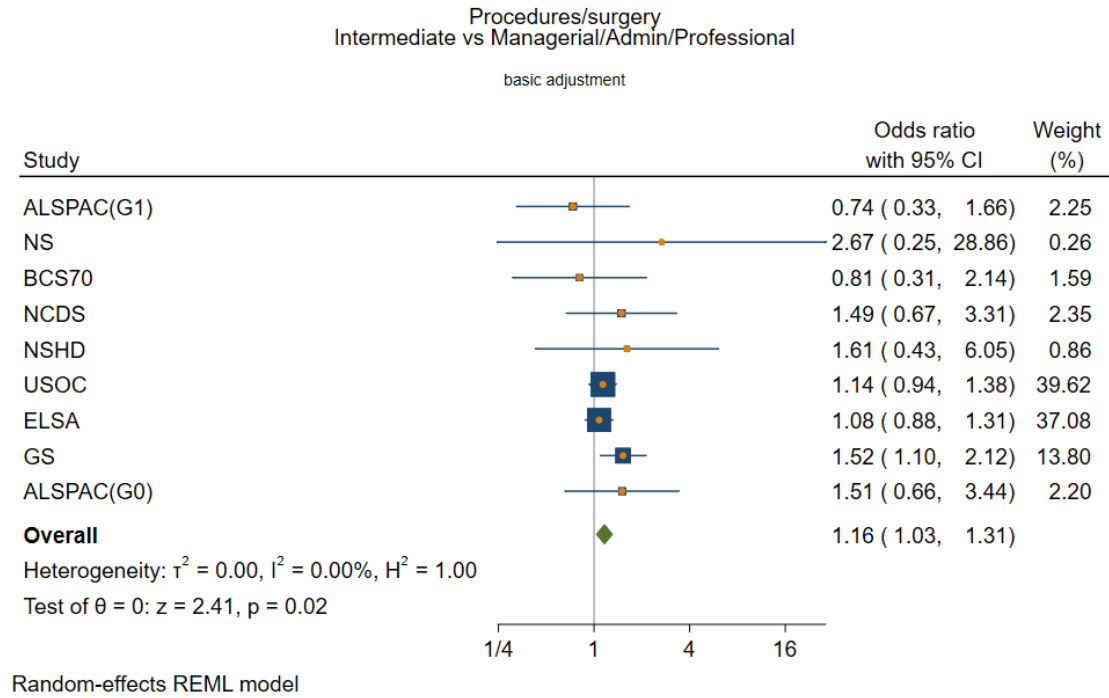

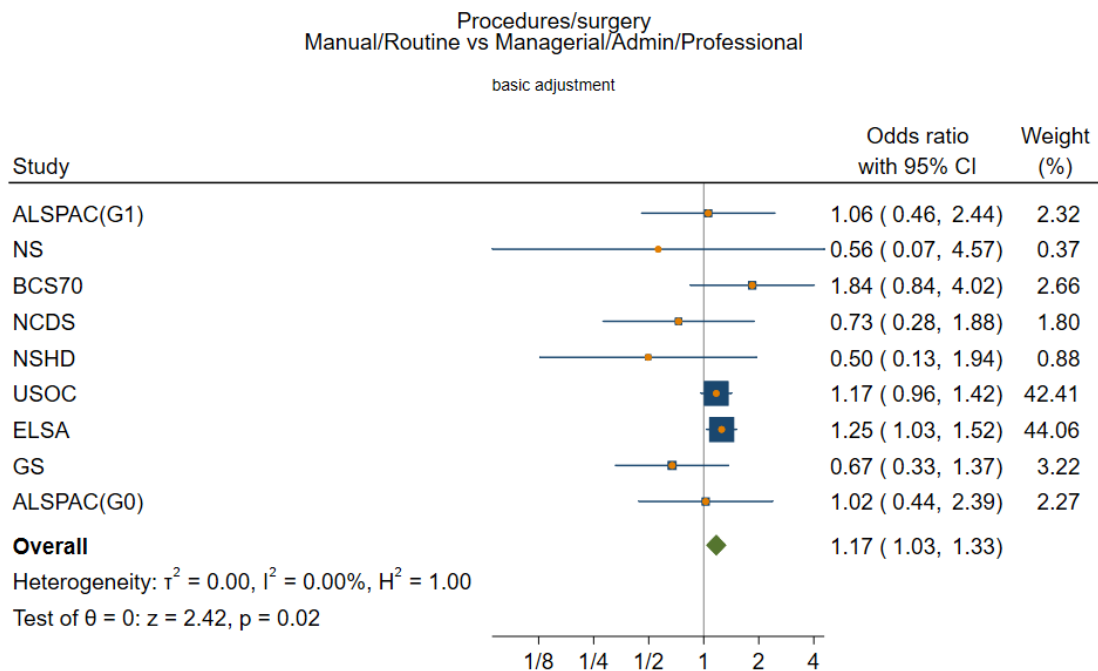

Random-effects REML model

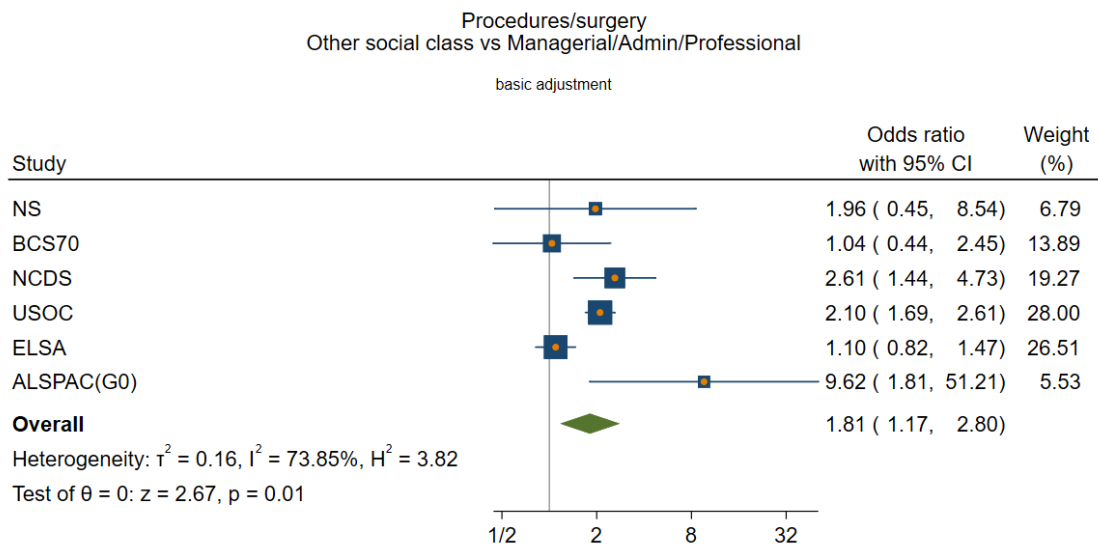

Random-effects REML model



Full adjustment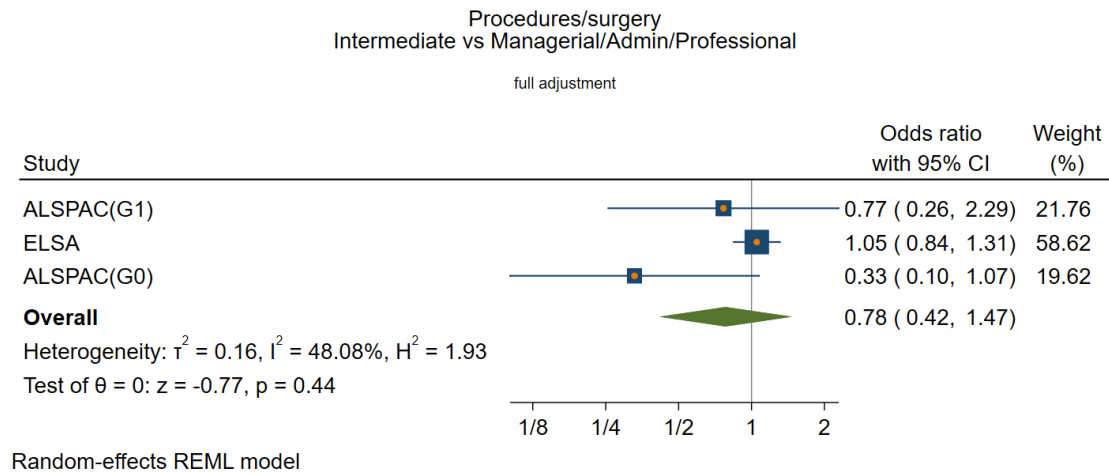

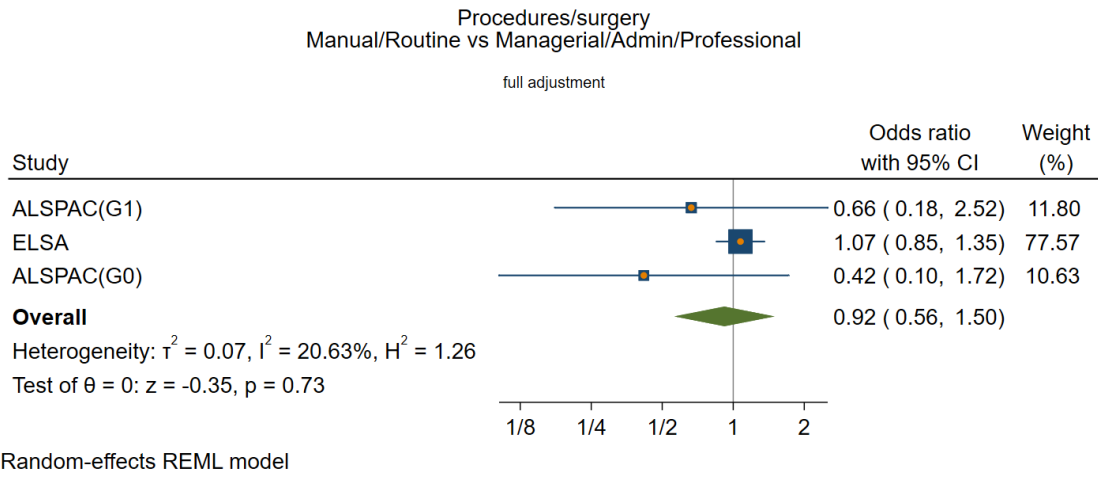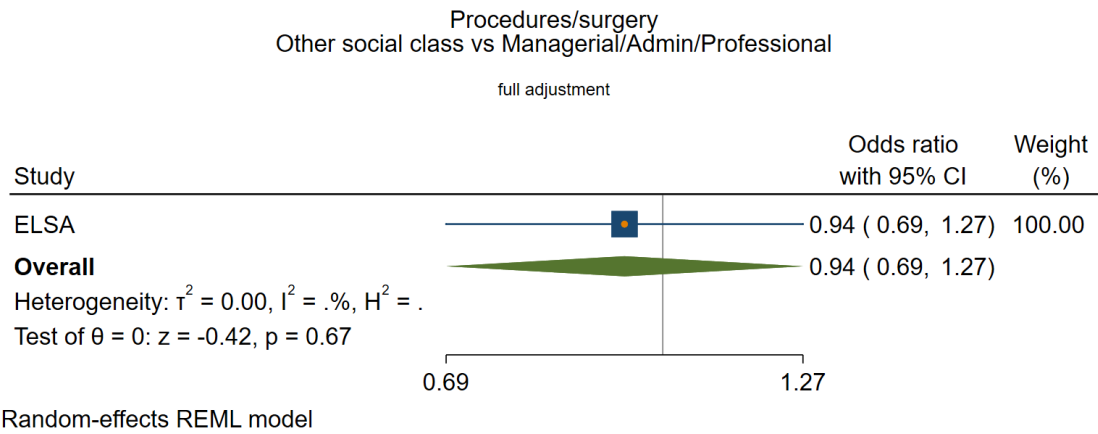

*Education*  
unadjusted

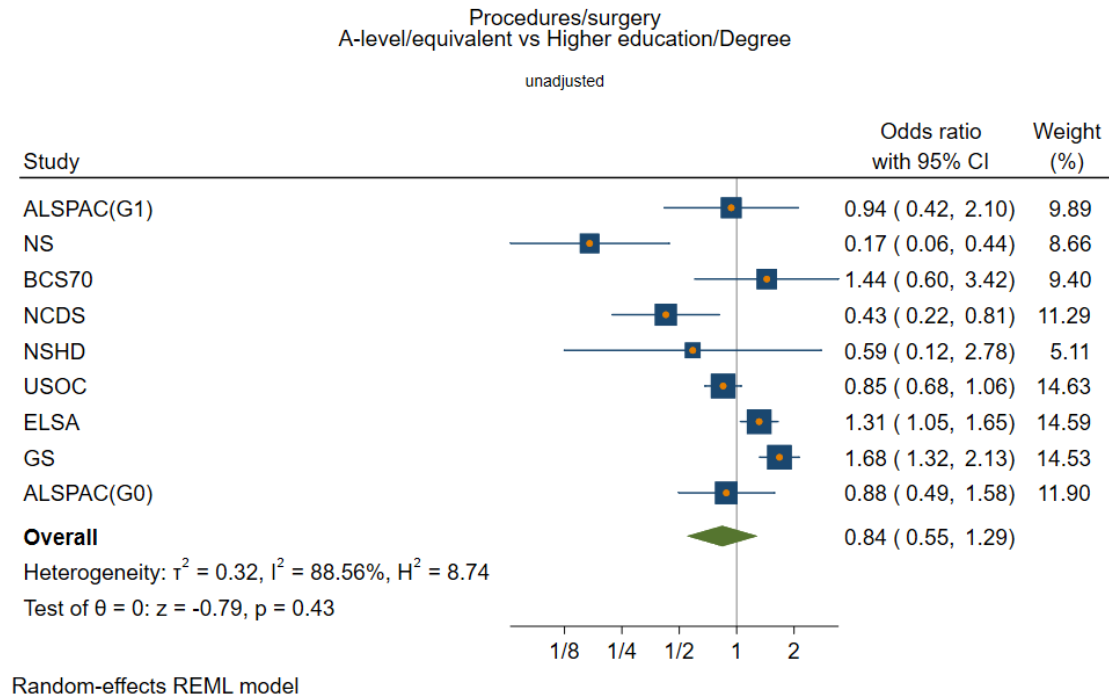

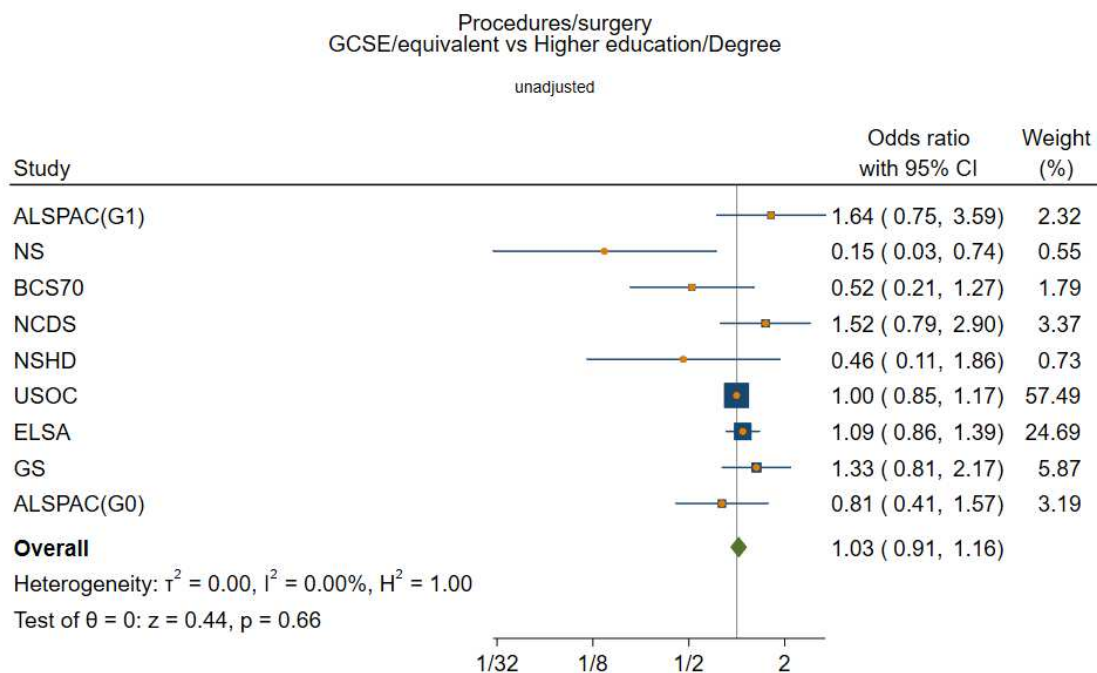

Random-effects REML model

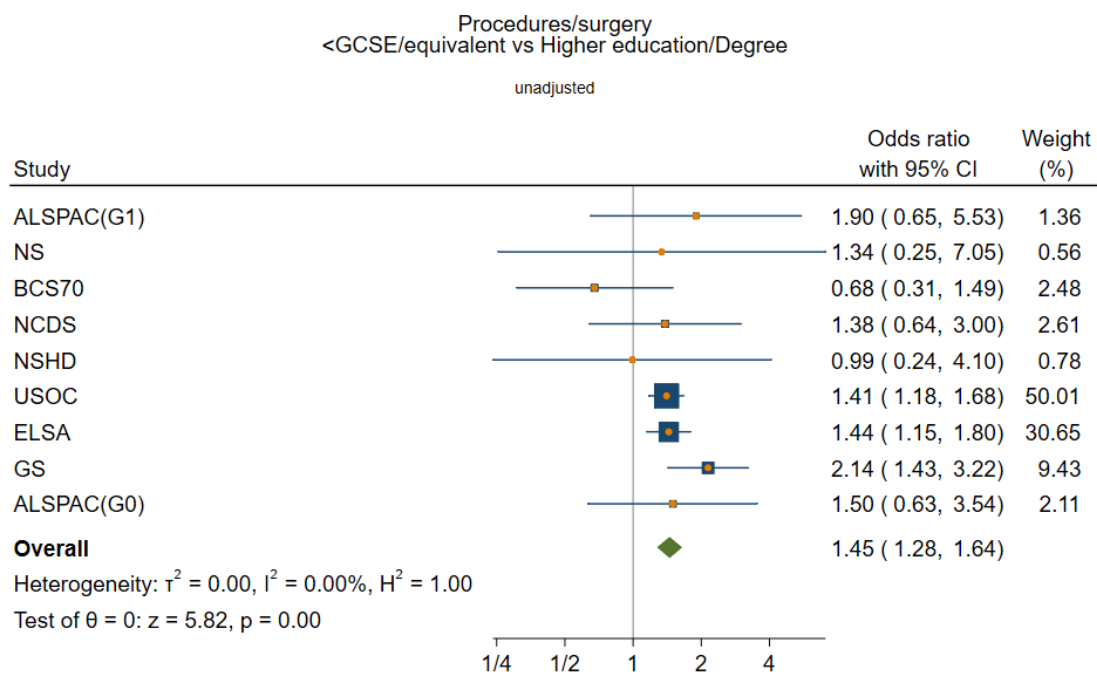

Random-effects REML model

Basic adjustment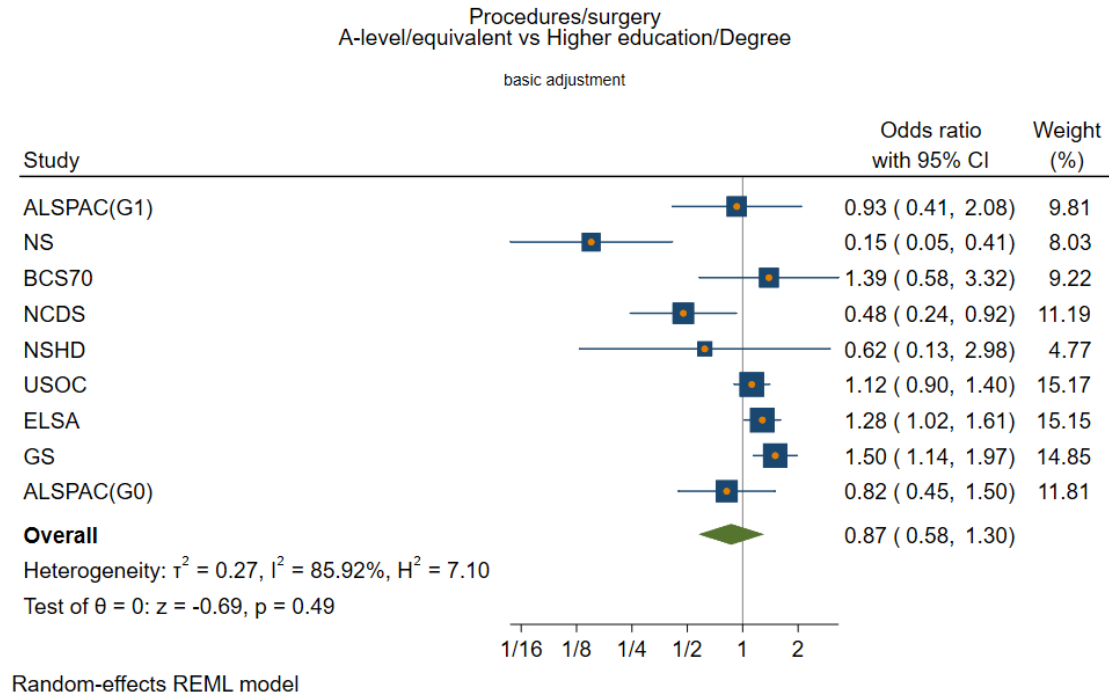

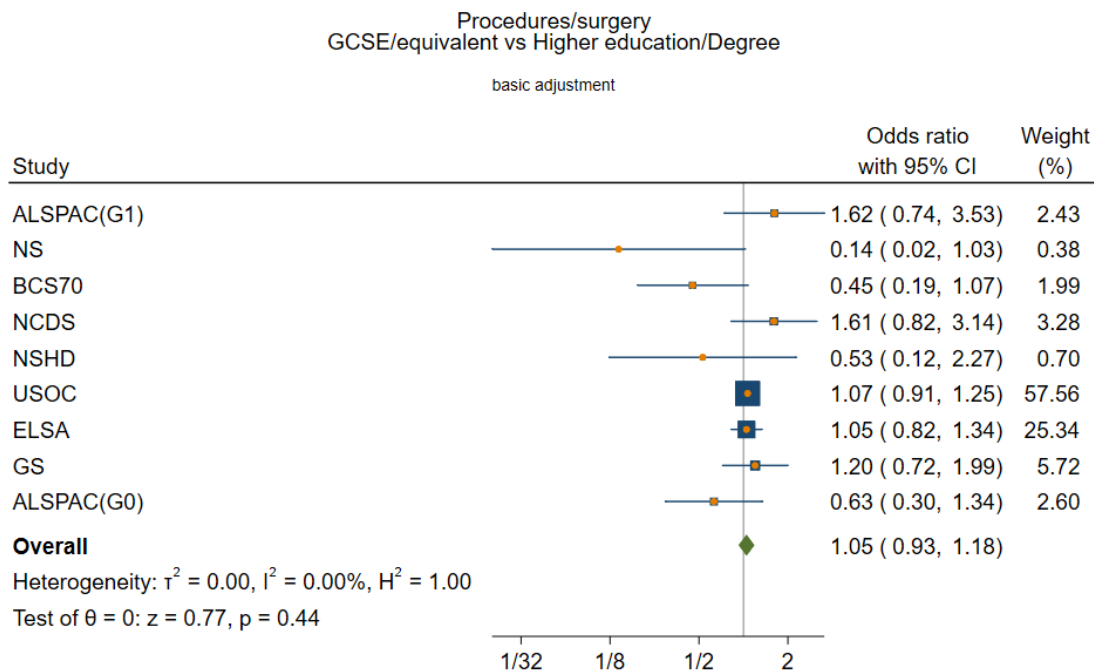

Random-effects REML model

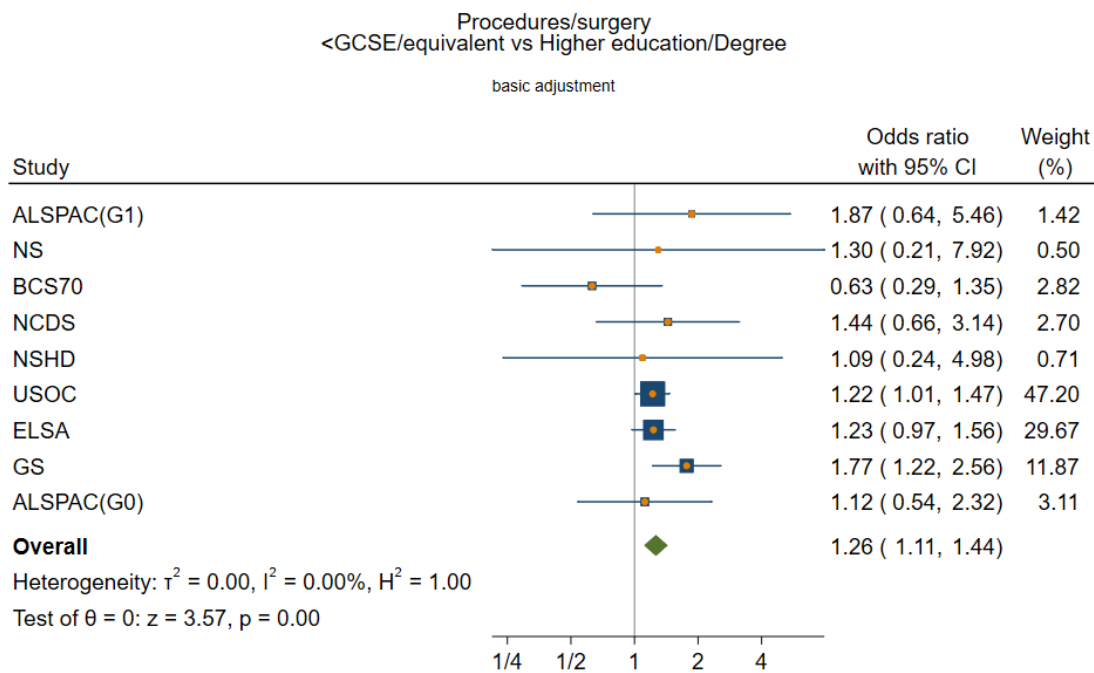

Random-effects REML model

Full adjustment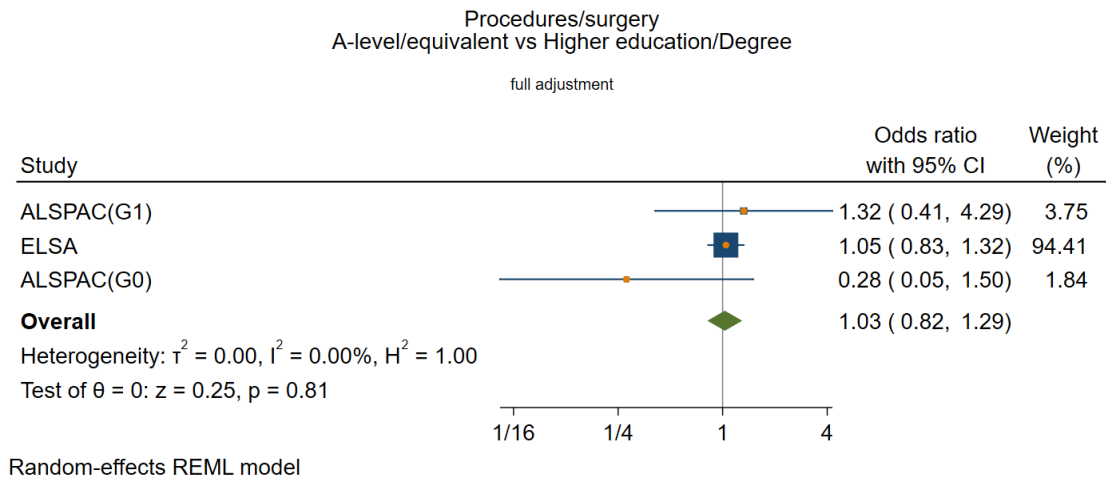

Procedures/surgery  
GCSE/equivalent vs Higher education/Degree

full adjustment

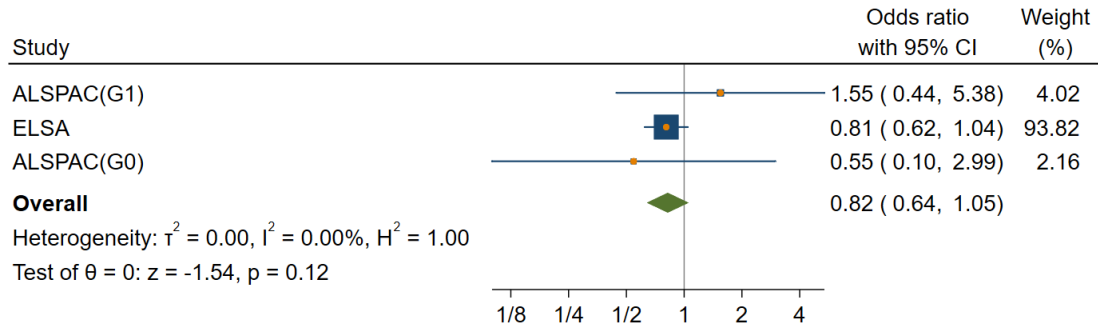

Random-effects REML model

Procedures/surgery  
<GCSE/equivalent vs Higher education/Degree

full adjustment

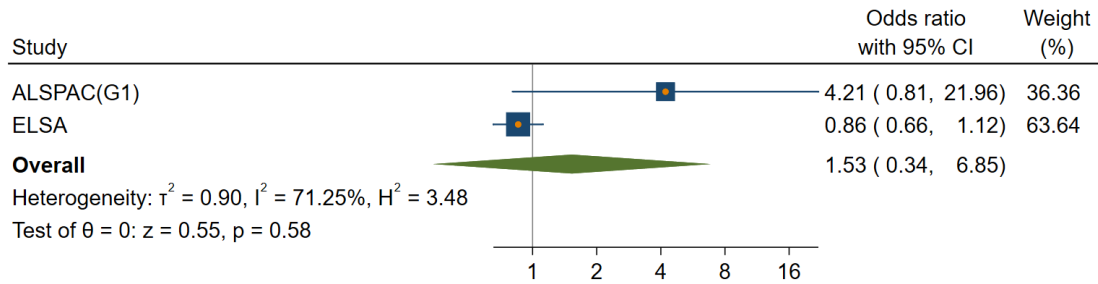

Random-effects REML model



Age  
Unadjusted

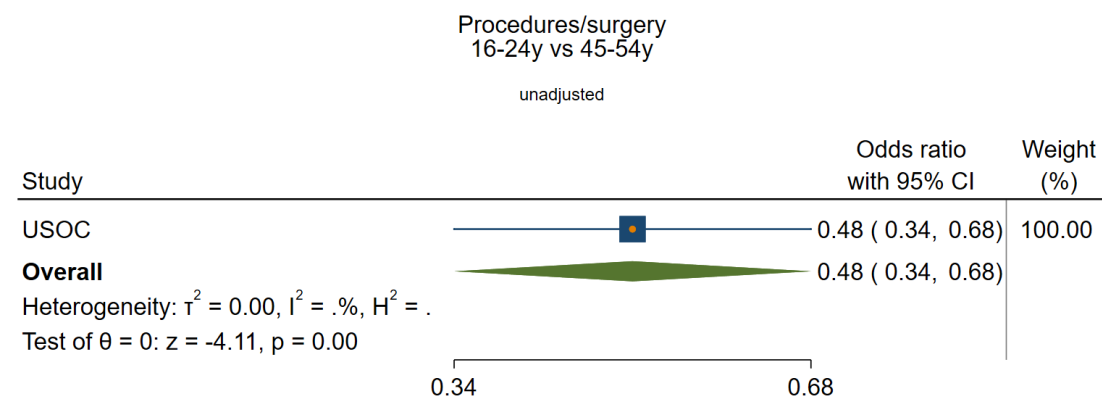

Random-effects REML model

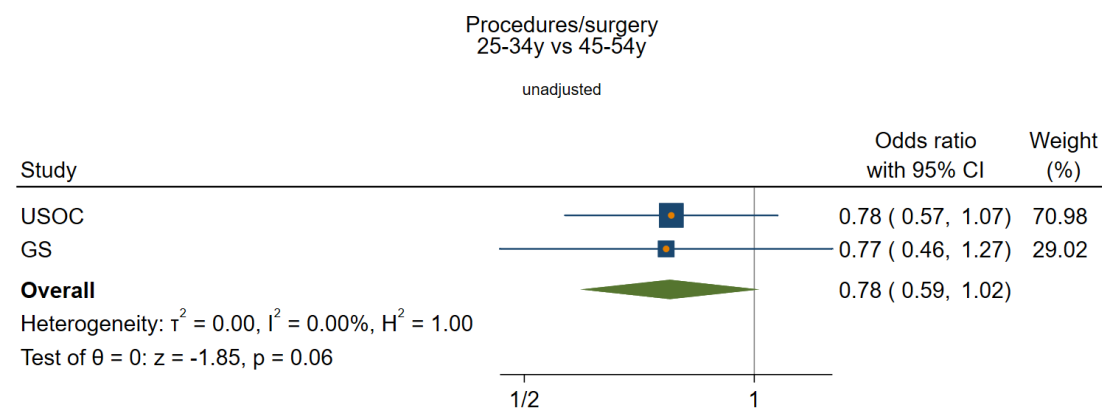

Random-effects REML model

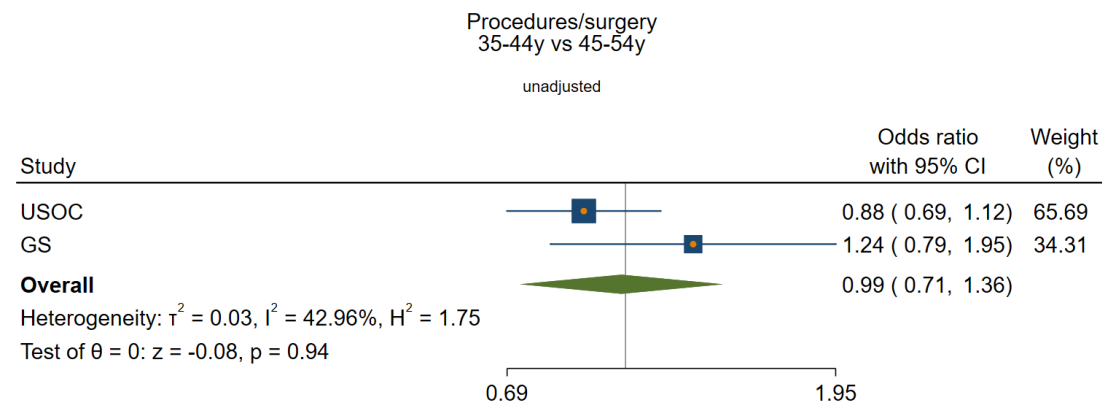

Random-effects REML model

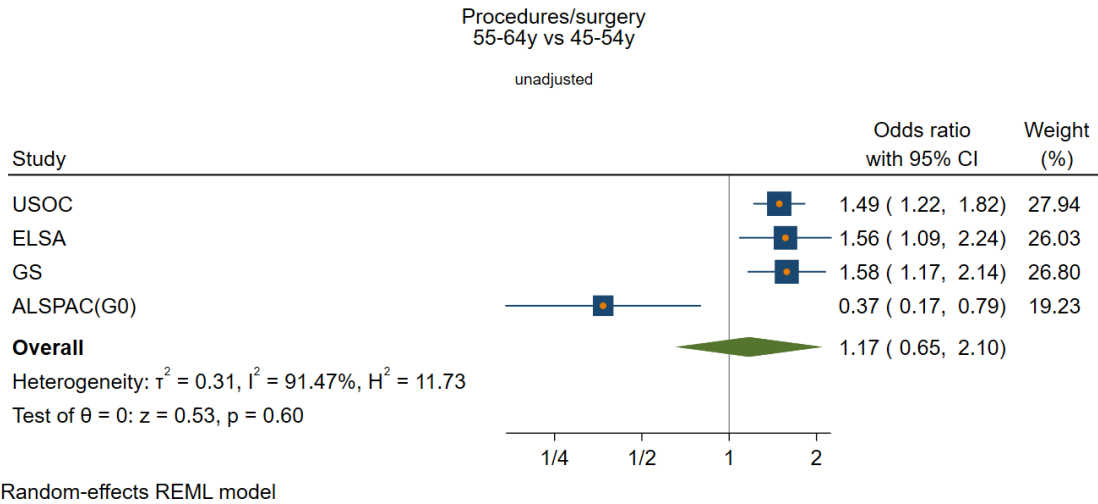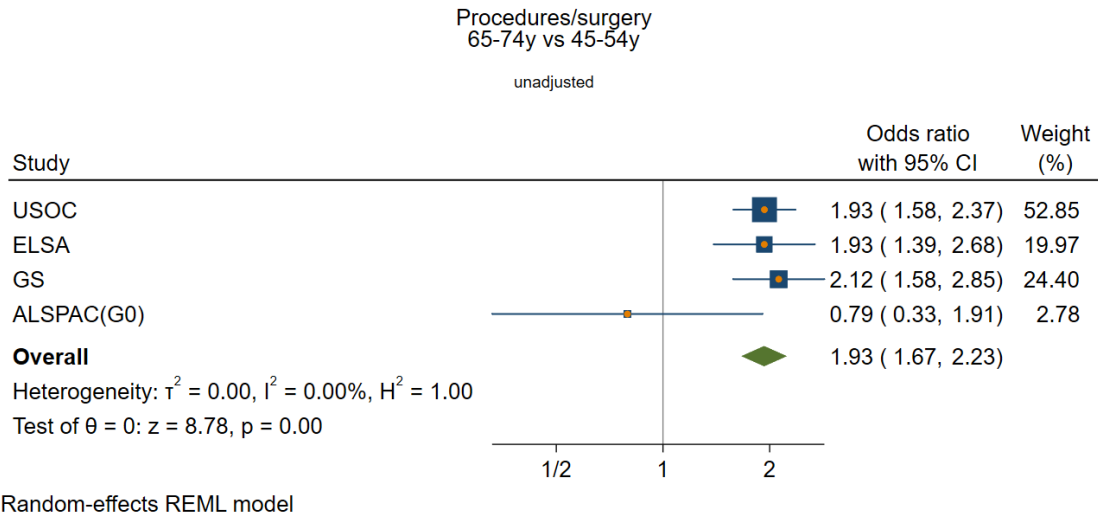

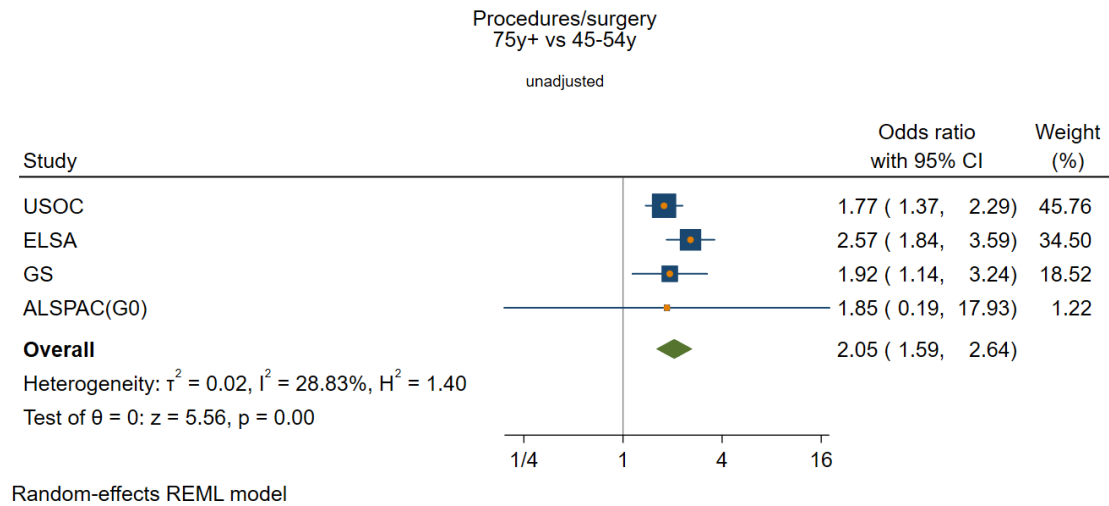

Basic adjustment

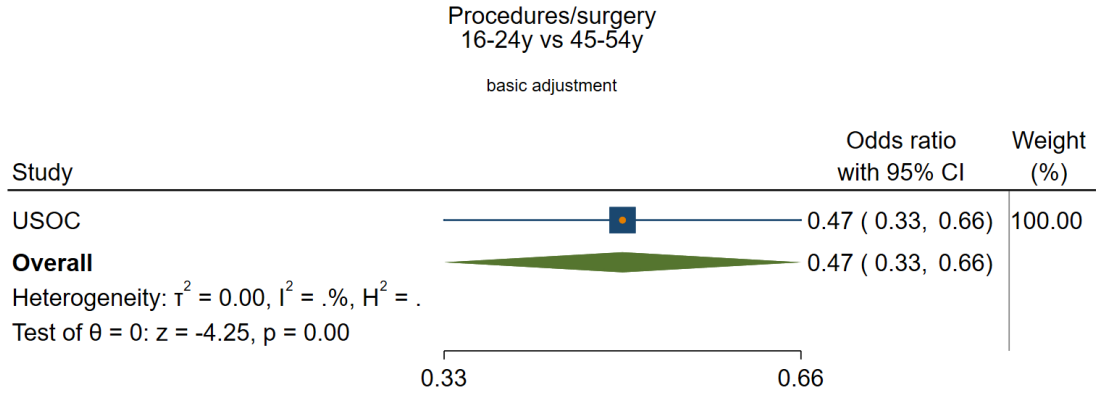

Random-effects REML model

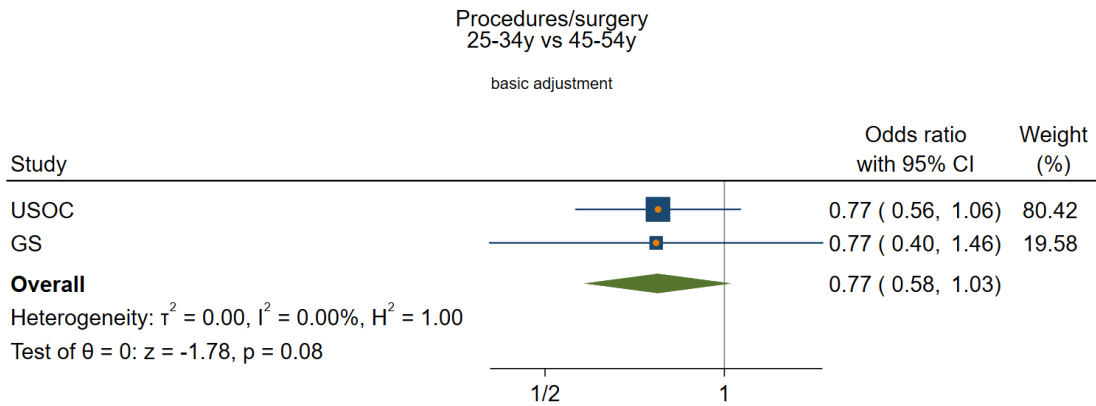

Random-effects REML model

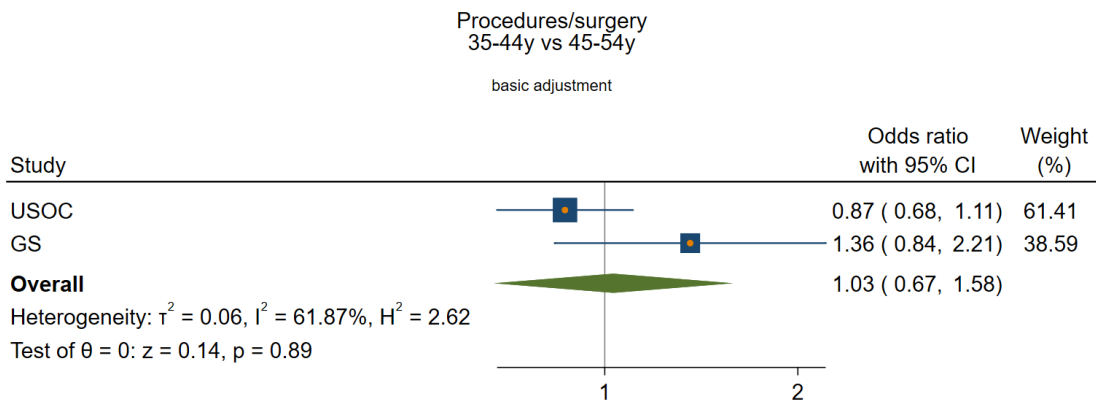

Random-effects REML model

Procedures/surgery  
55-64y vs 45-54y

basic adjustment

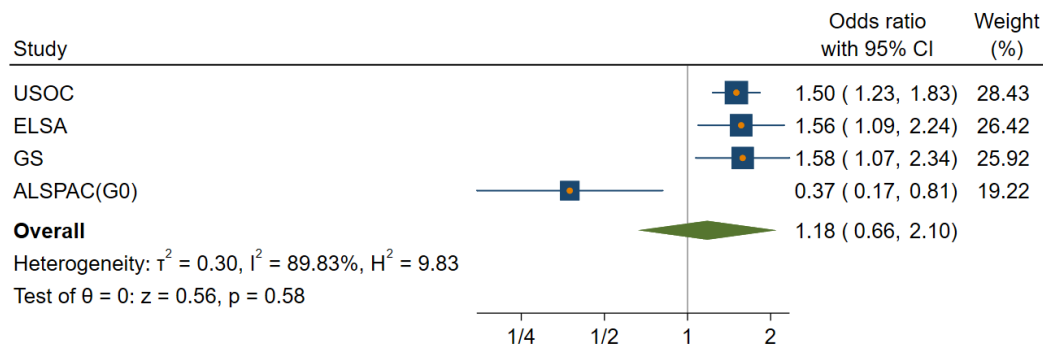

Random-effects REML model

Procedures/surgery  
65-74y vs 45-54y

basic adjustment

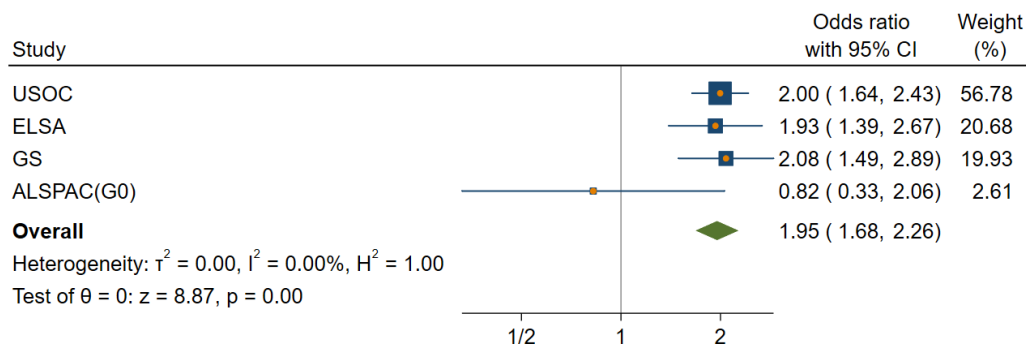

Random-effects REML model

Procedures/surgery  
75y+ vs 45-54y

basic adjustment

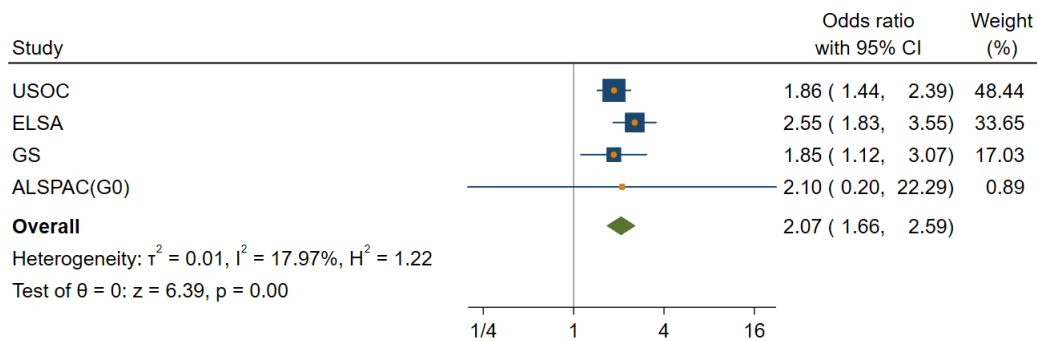

Random-effects REML model

Full adjustment

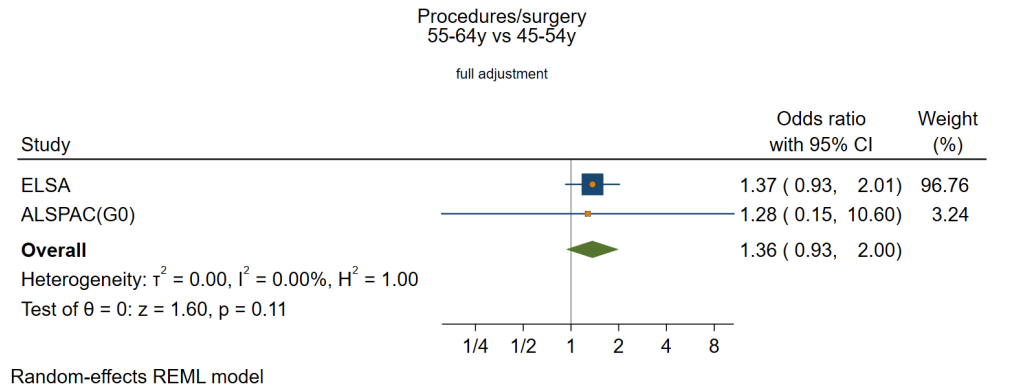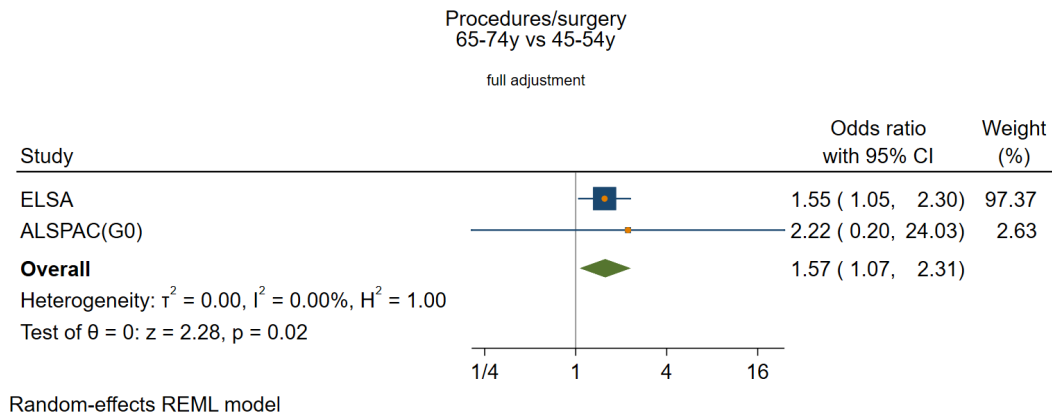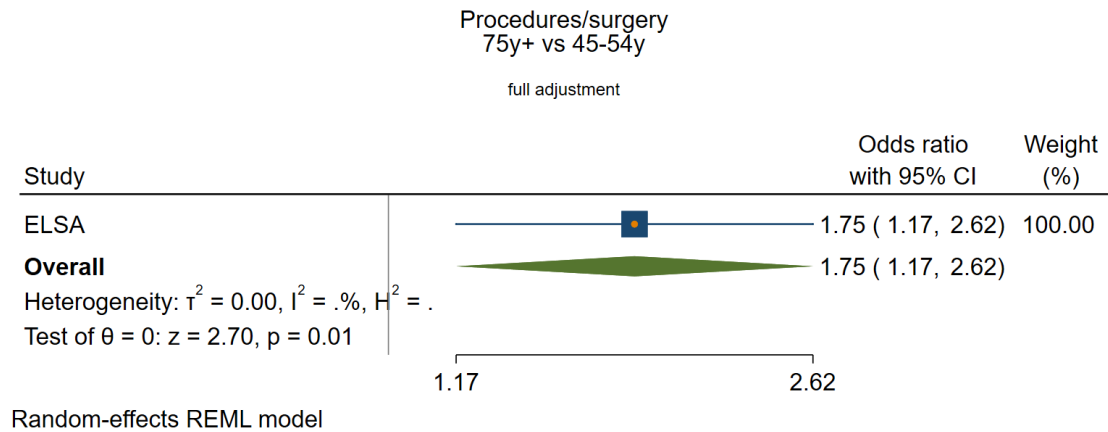

*Ethnicity*  
Unadjusted

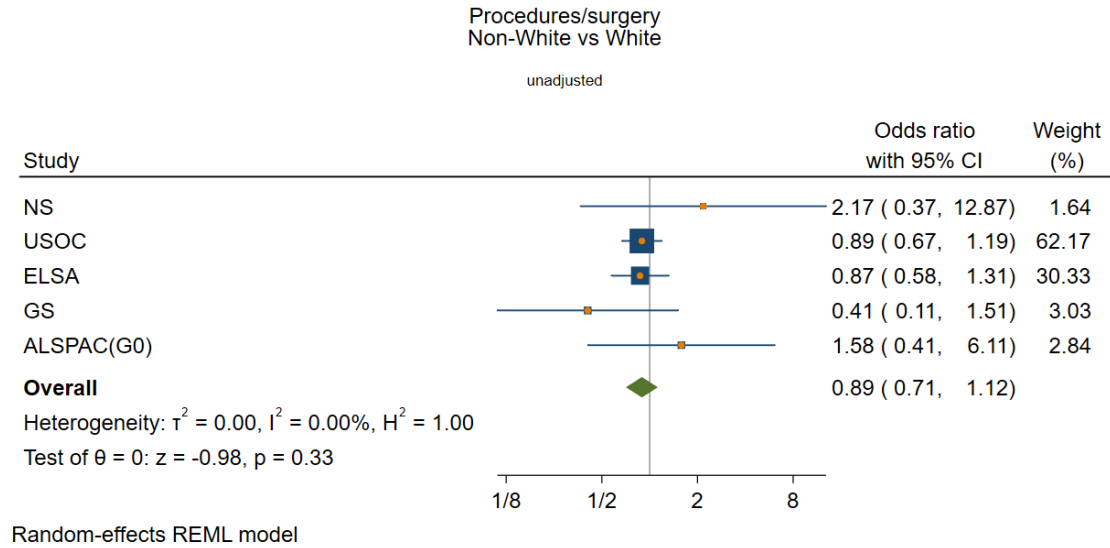

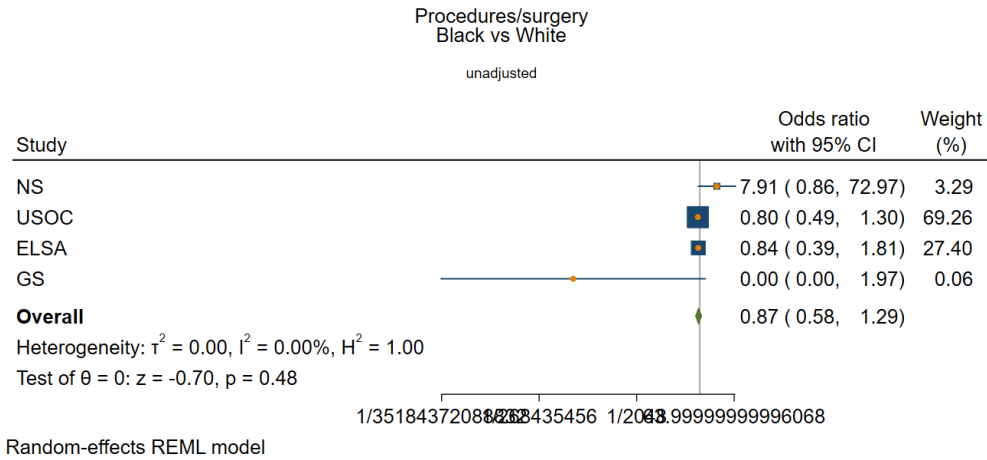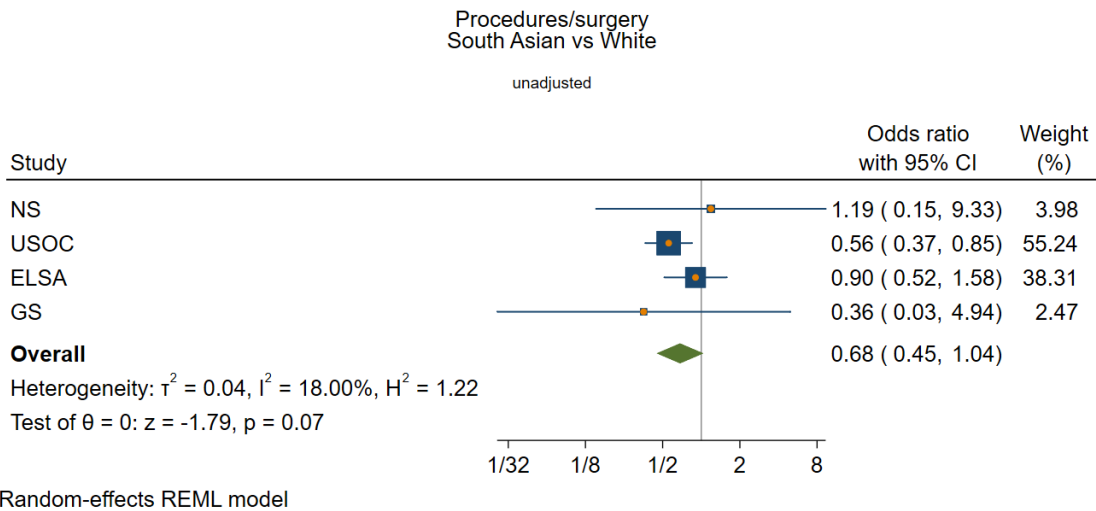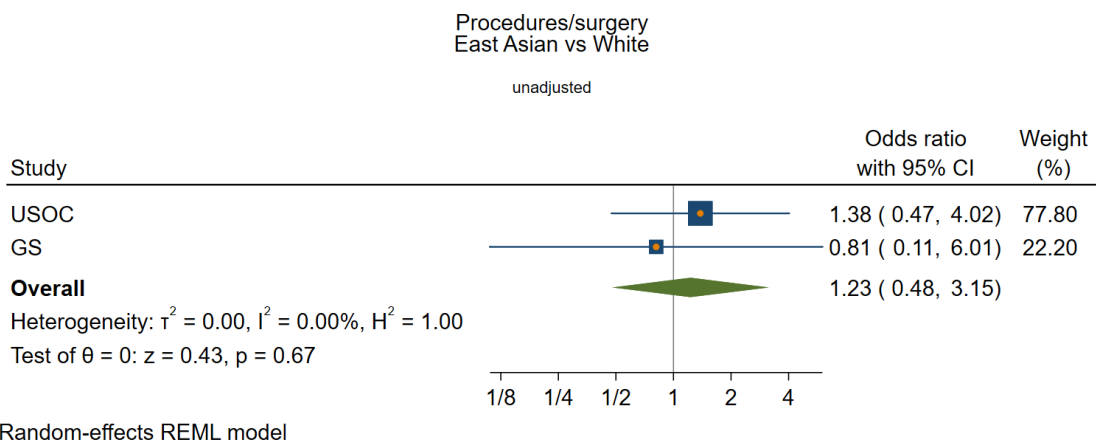



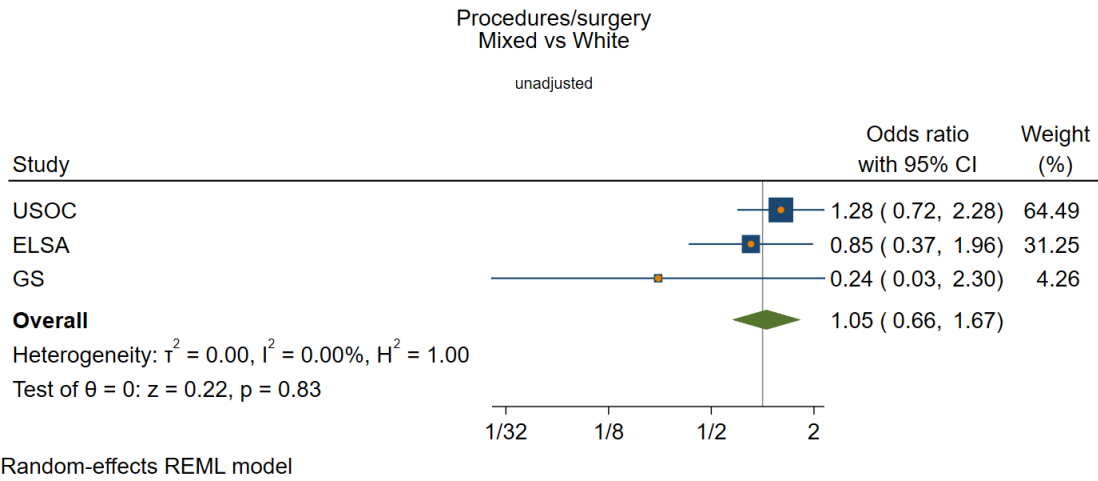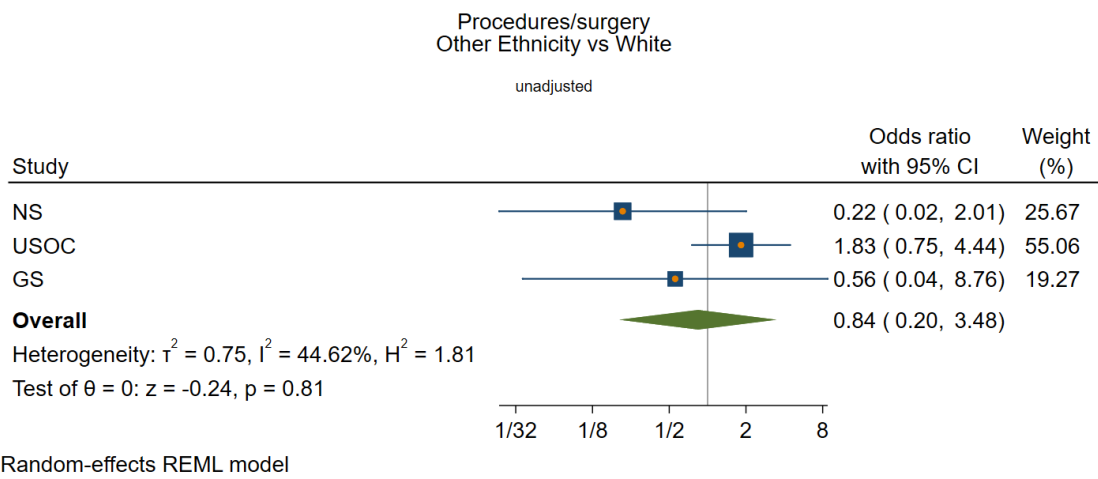

Basic adjustment

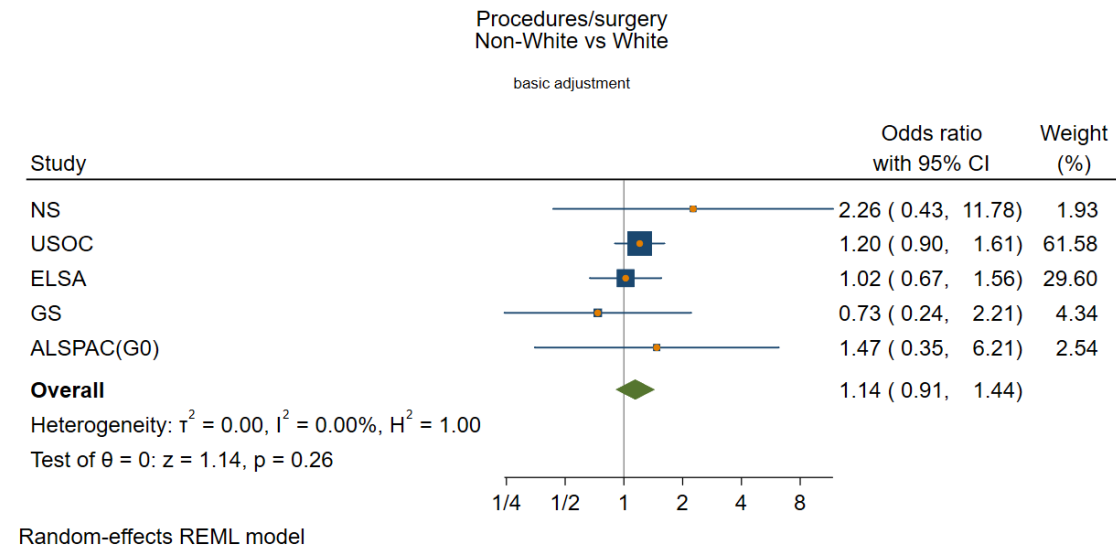

Procedures/surgery  
Black vs White

basic adjustment

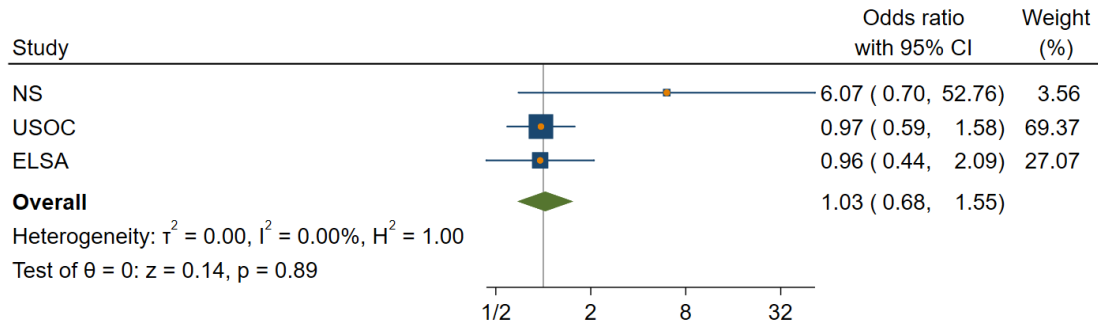

Random-effects REML model

Procedures/surgery  
South Asian vs White

basic adjustment

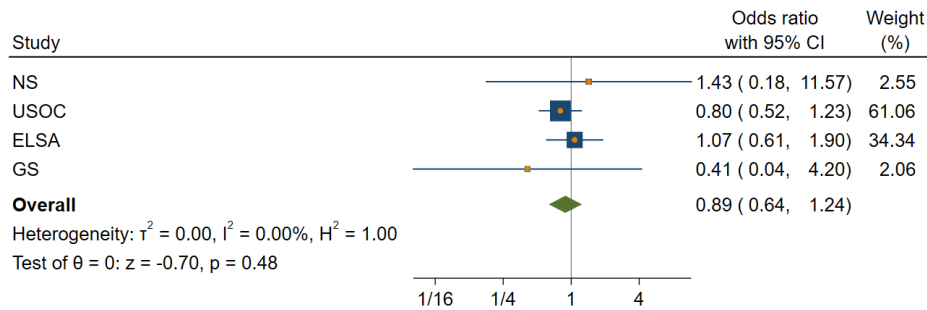

Random-effects REML model

Procedures/surgery  
East Asian vs White

basic adjustment

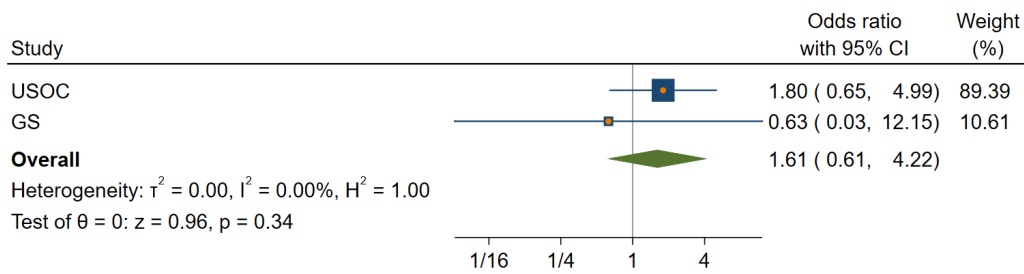

Random-effects REML model

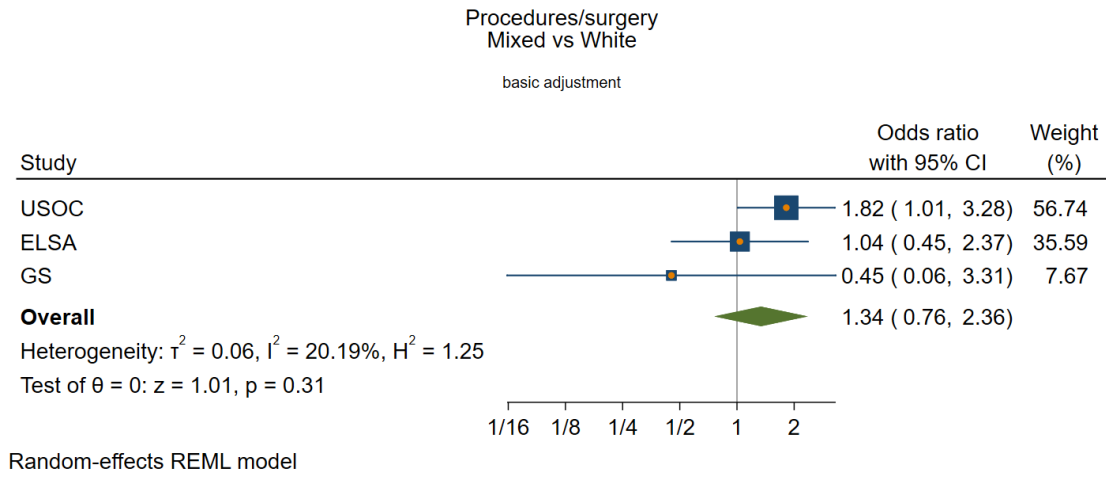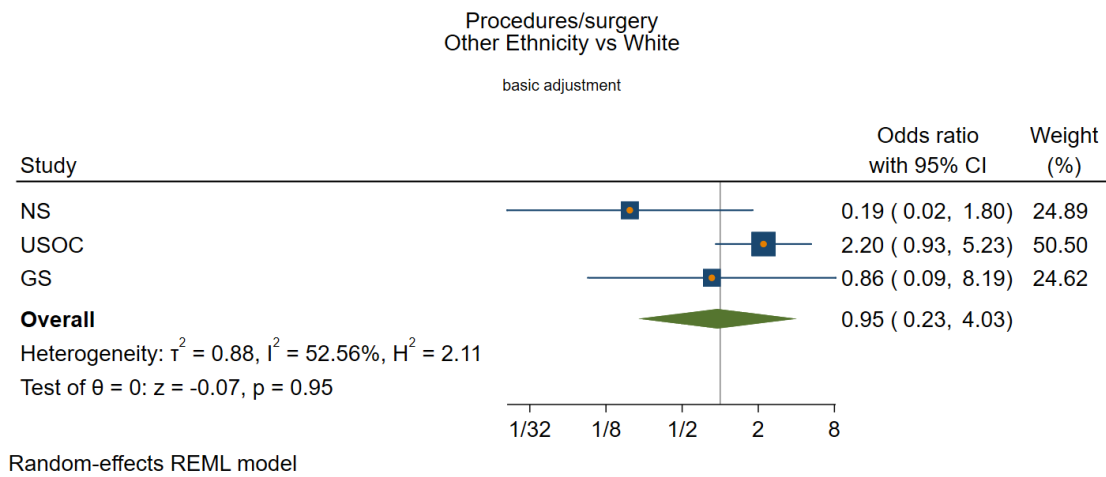

Full adjustment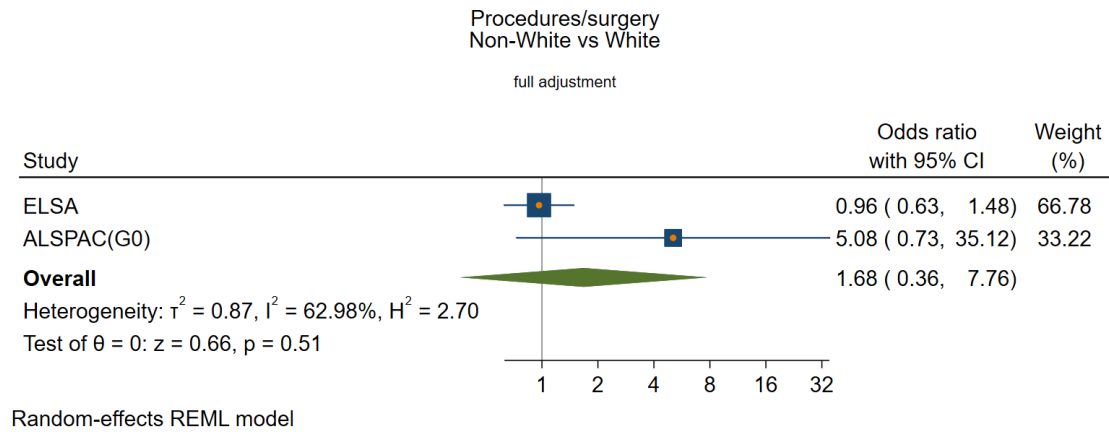

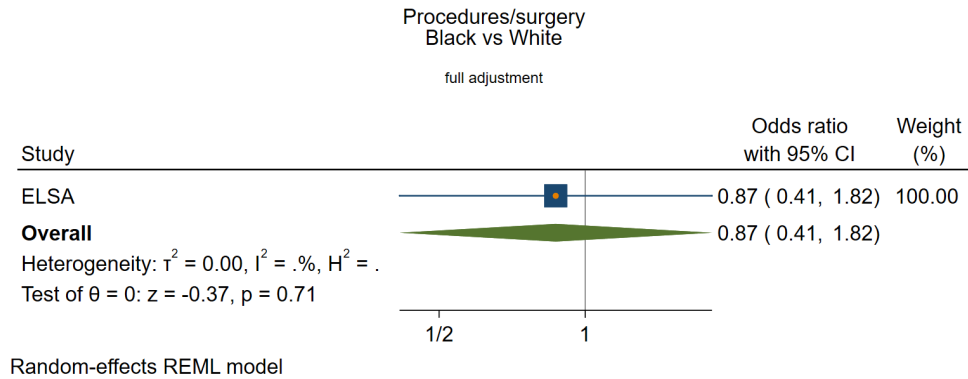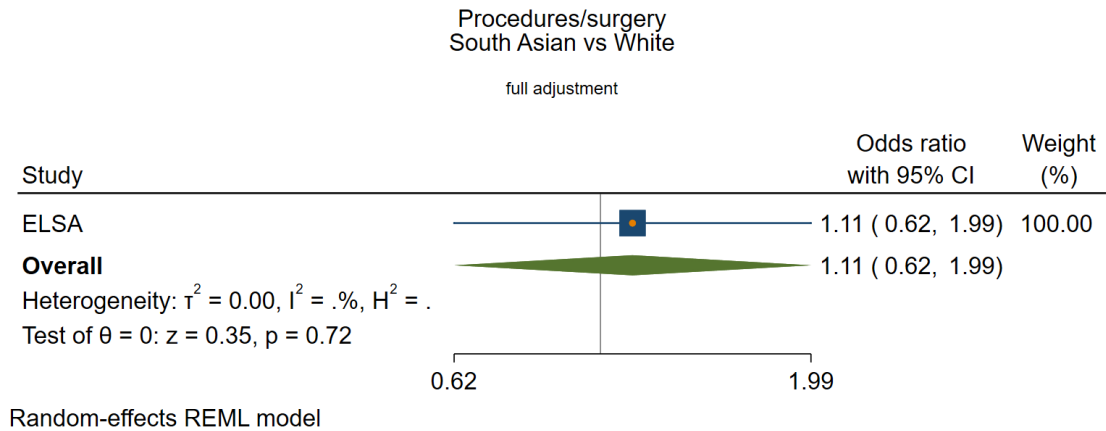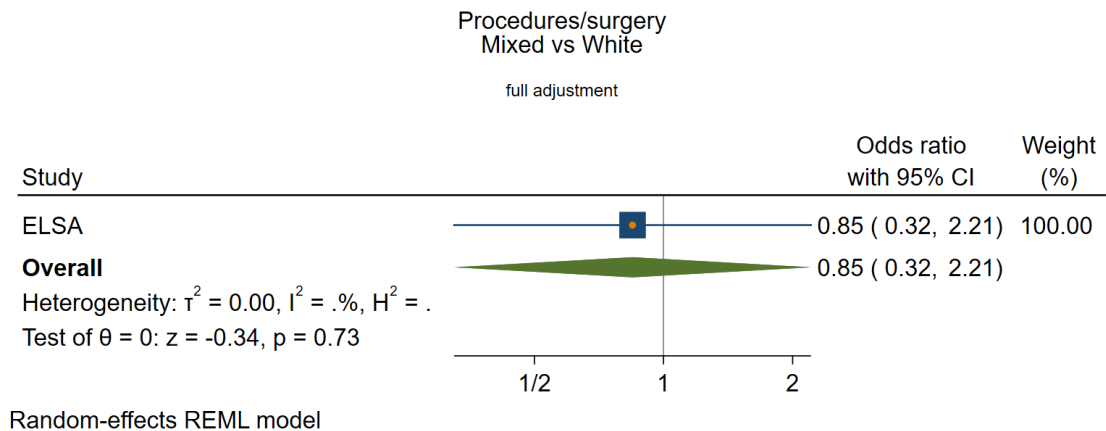

### Any healthcare disruption stratified by shielding status

Sex

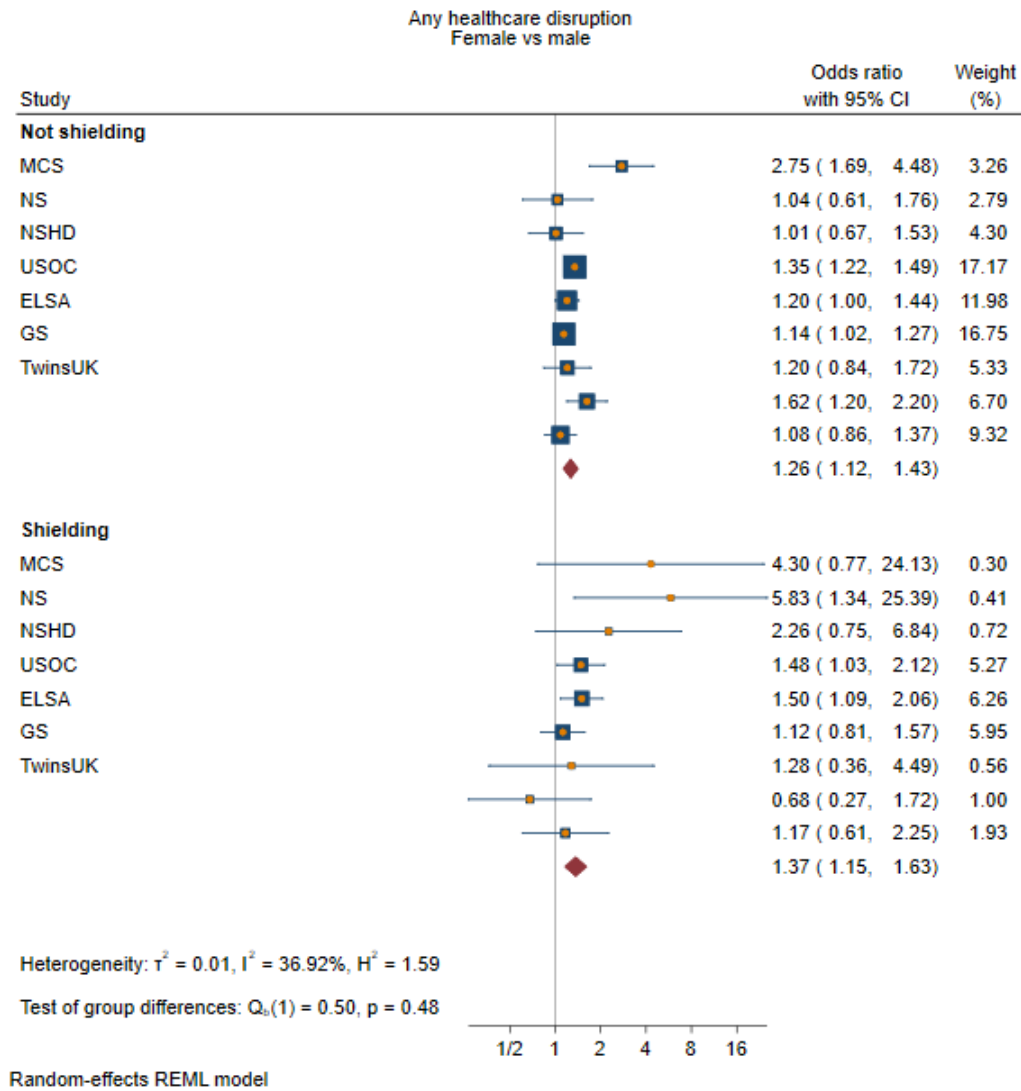

*Occupational class*



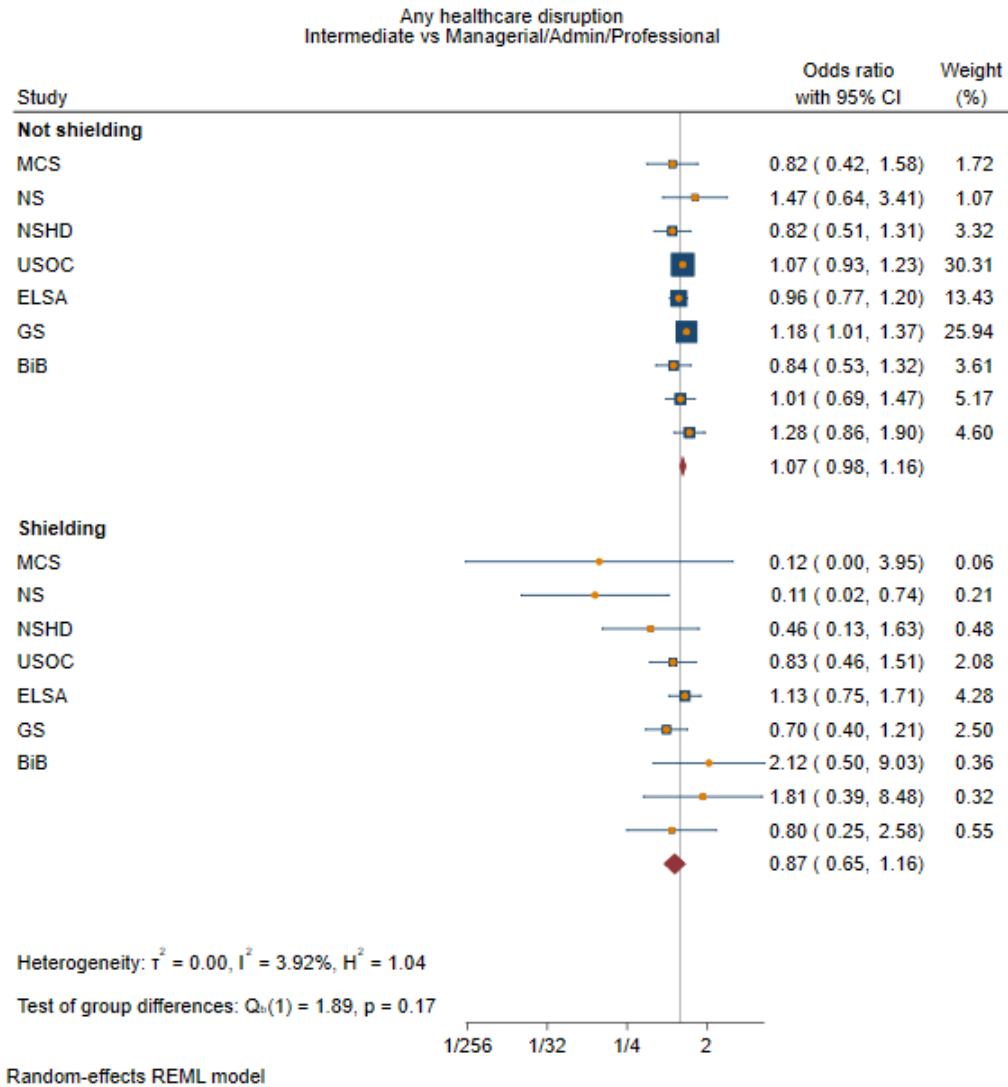

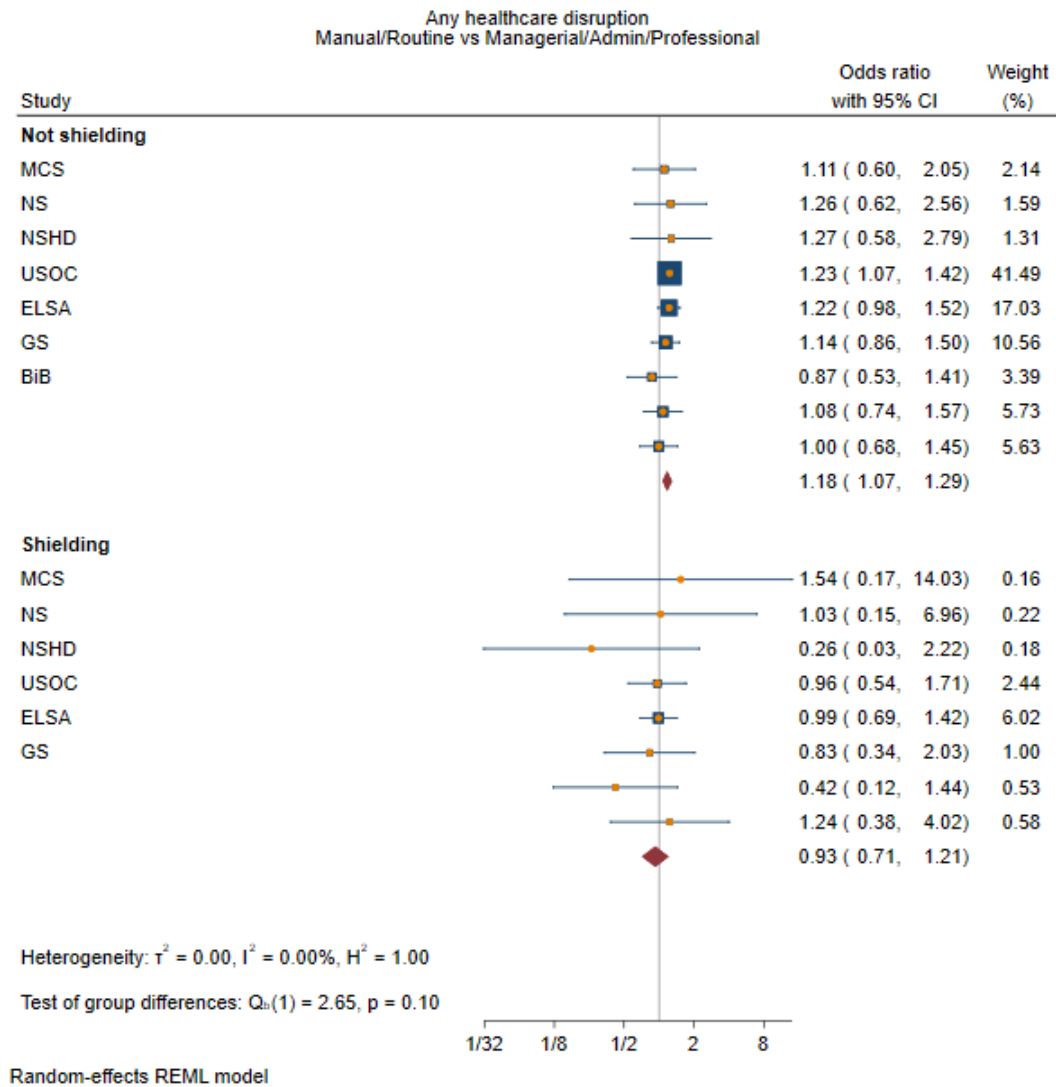

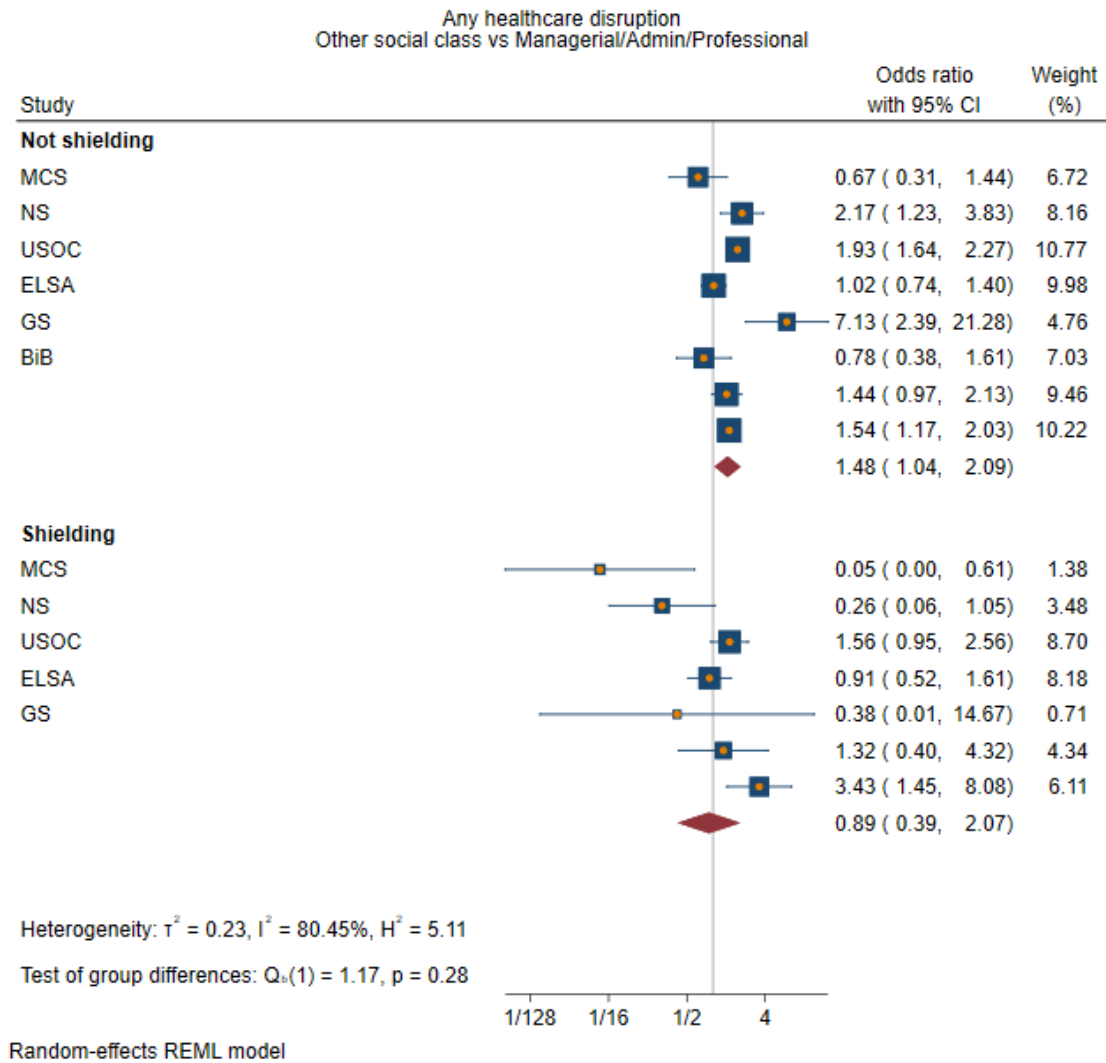

*Education*

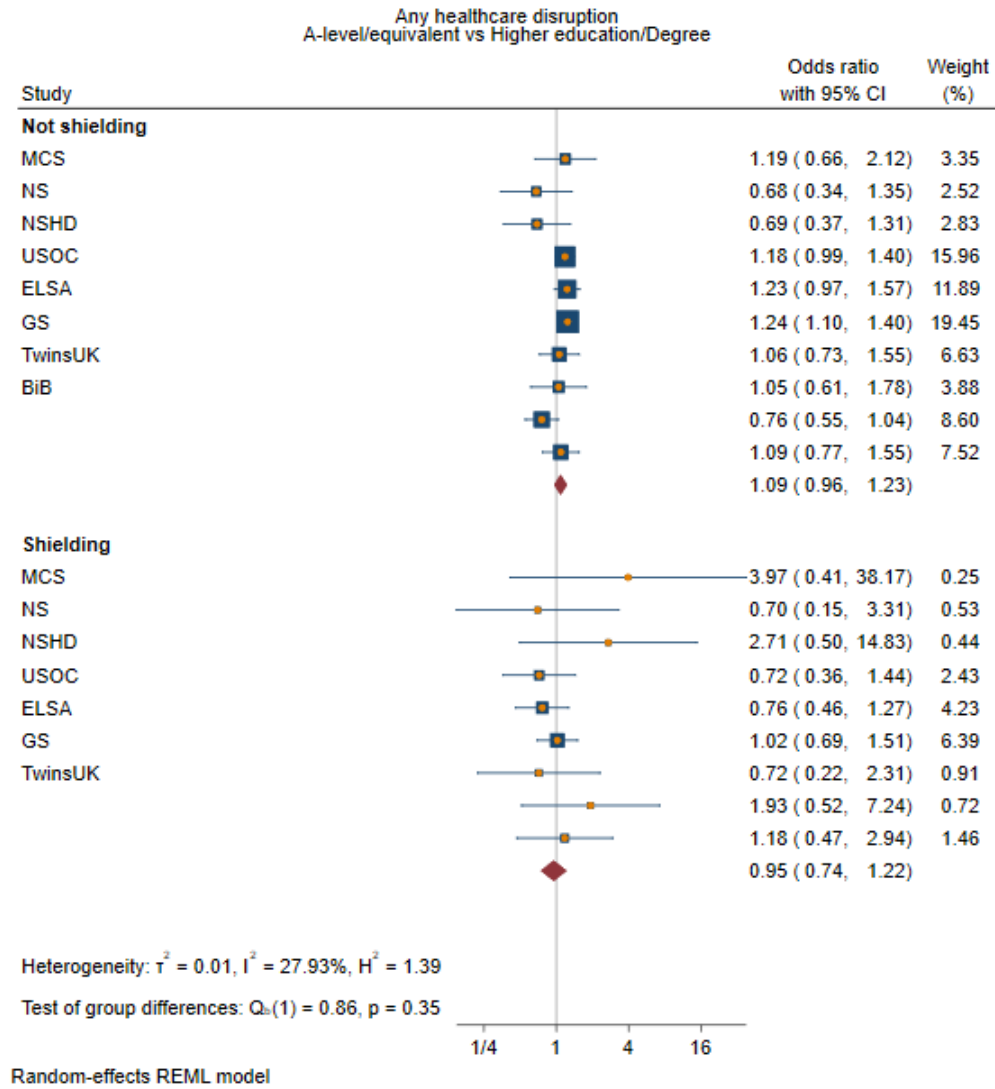

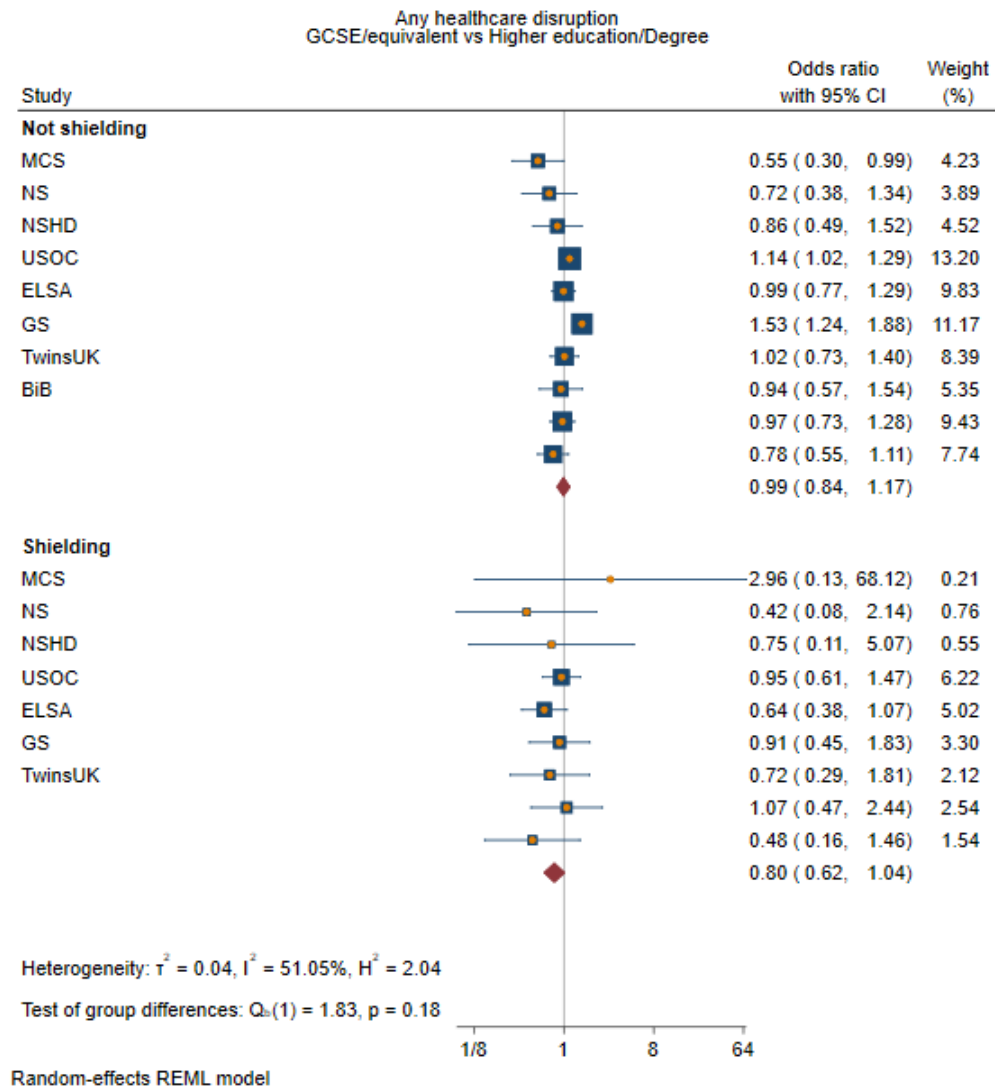

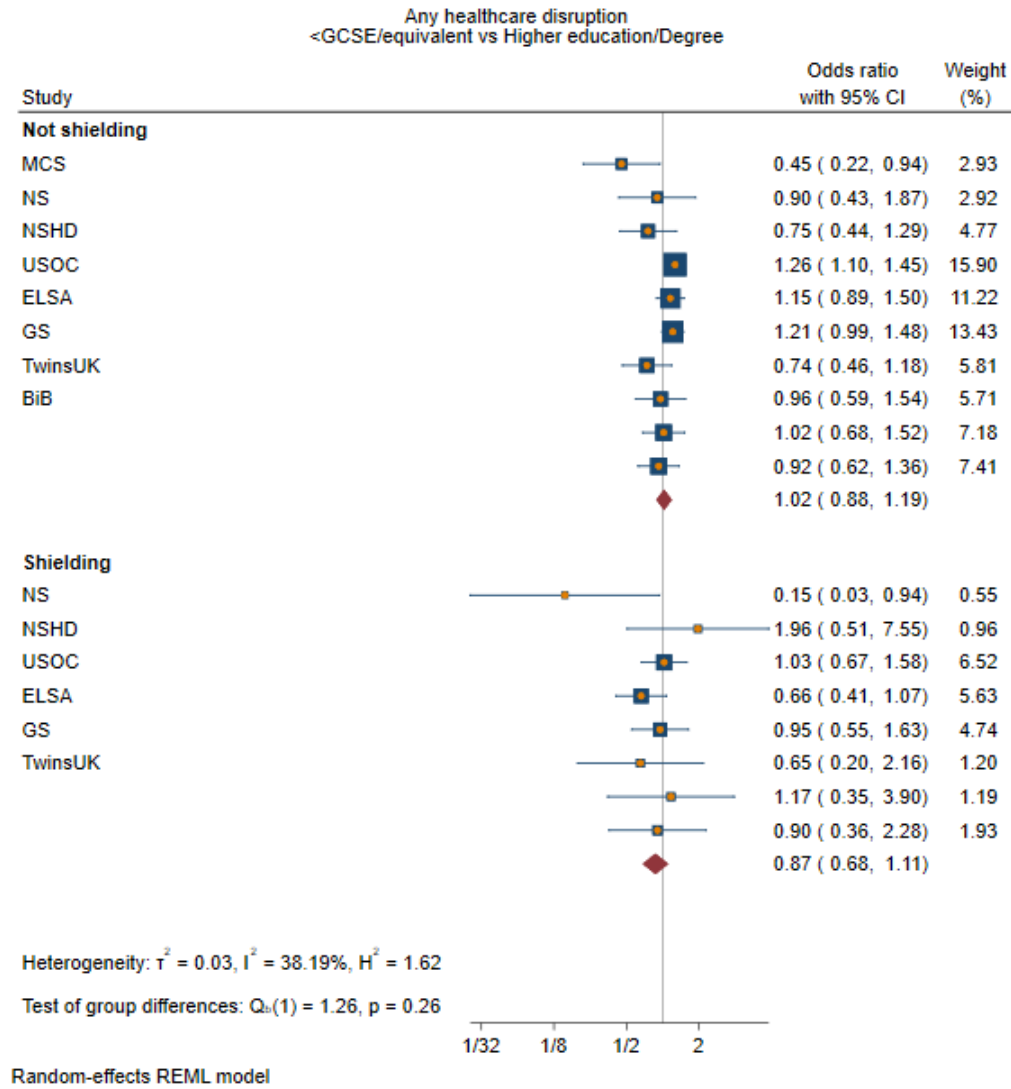

Age

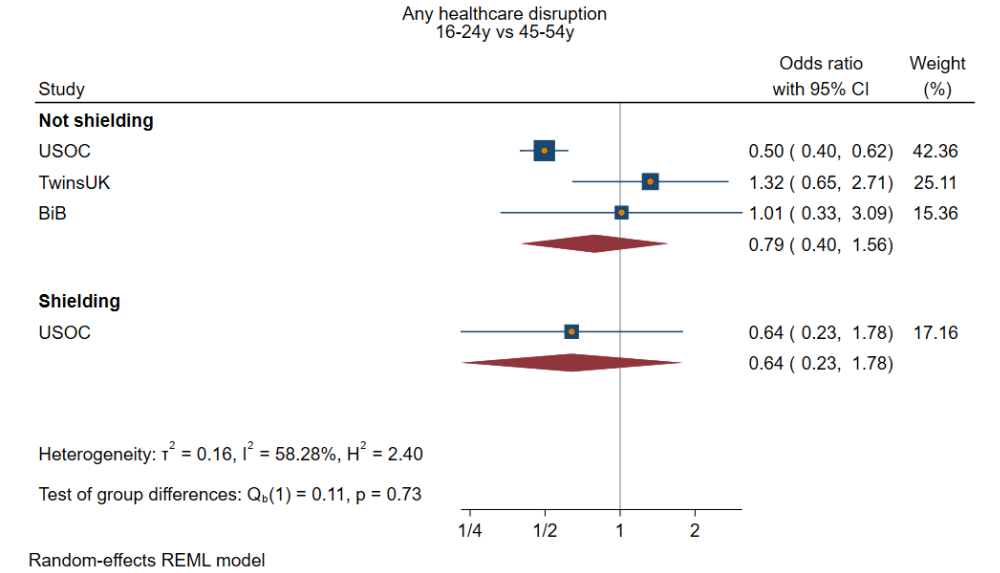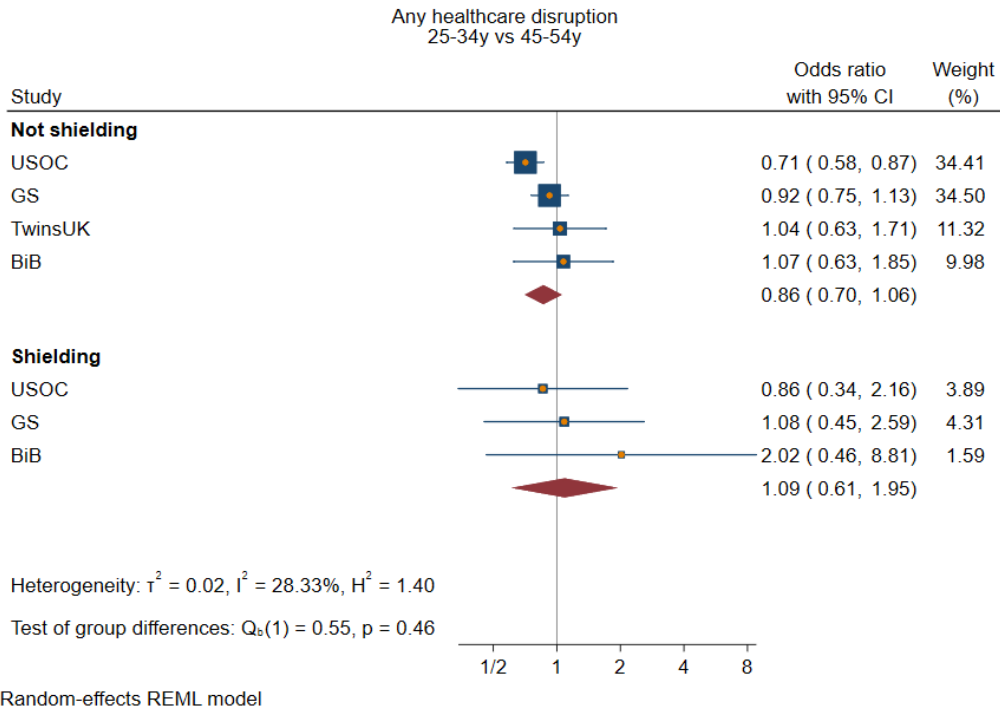



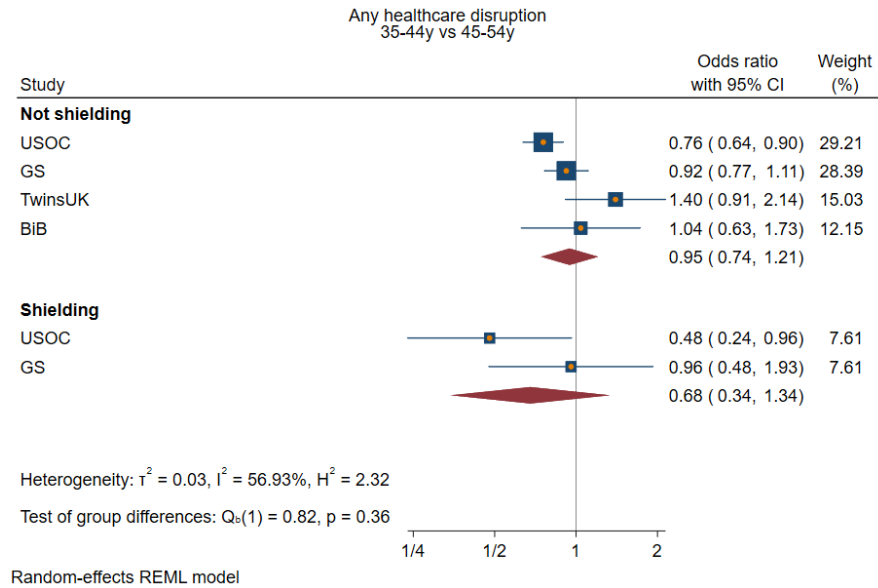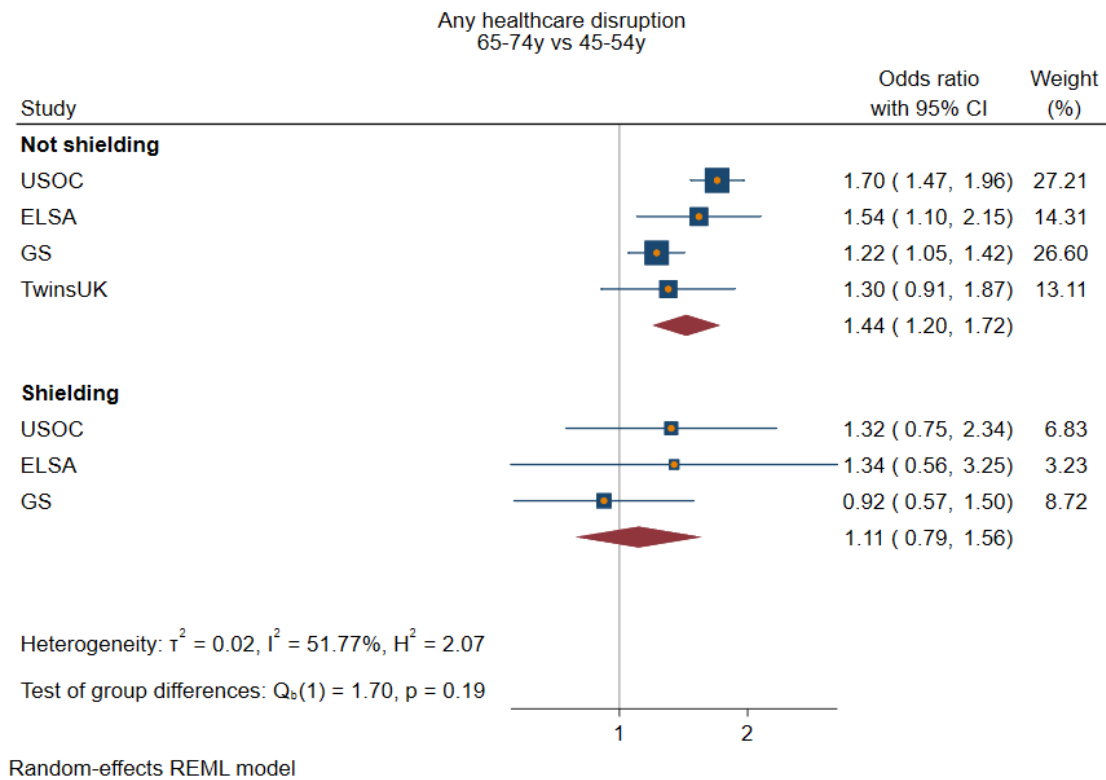

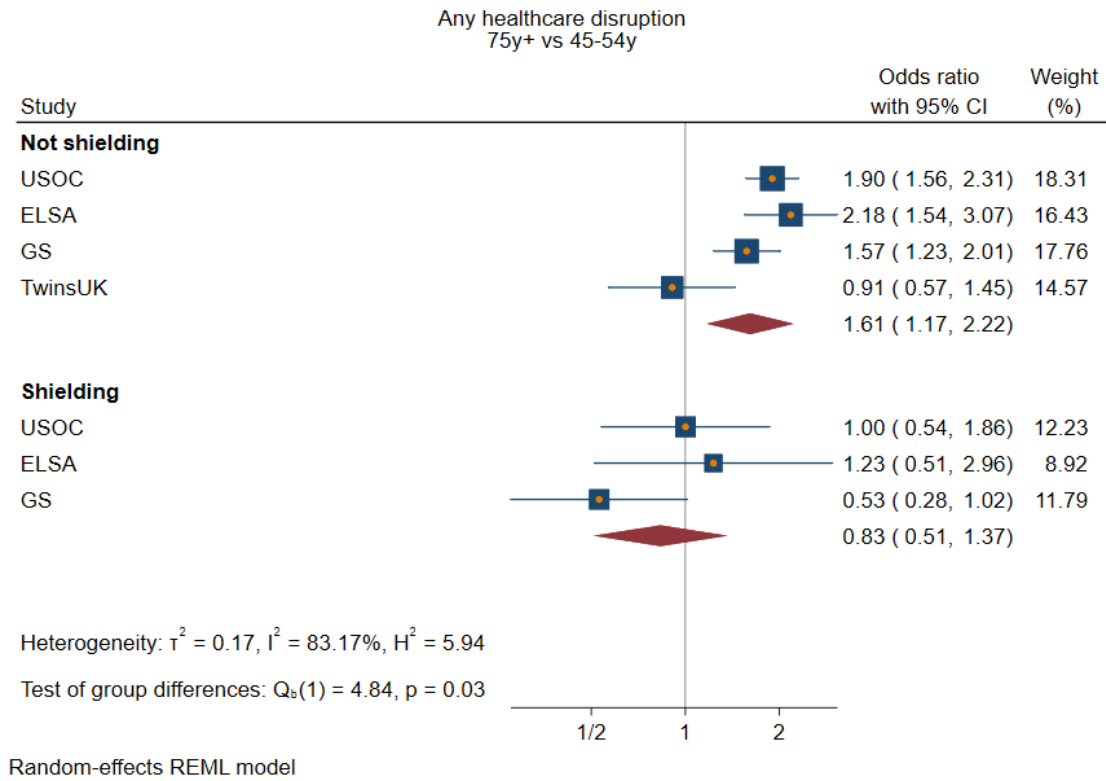

*Ethnicity*

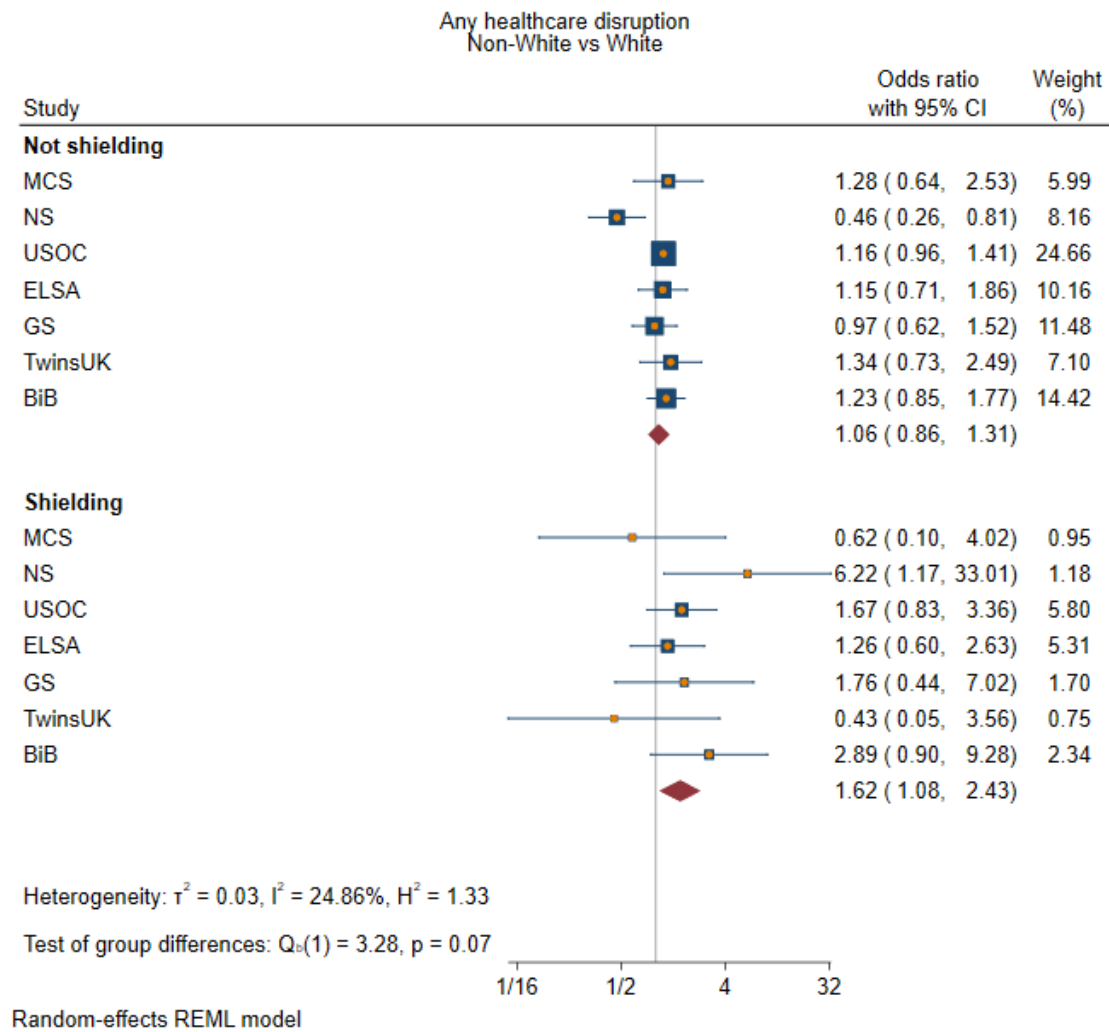

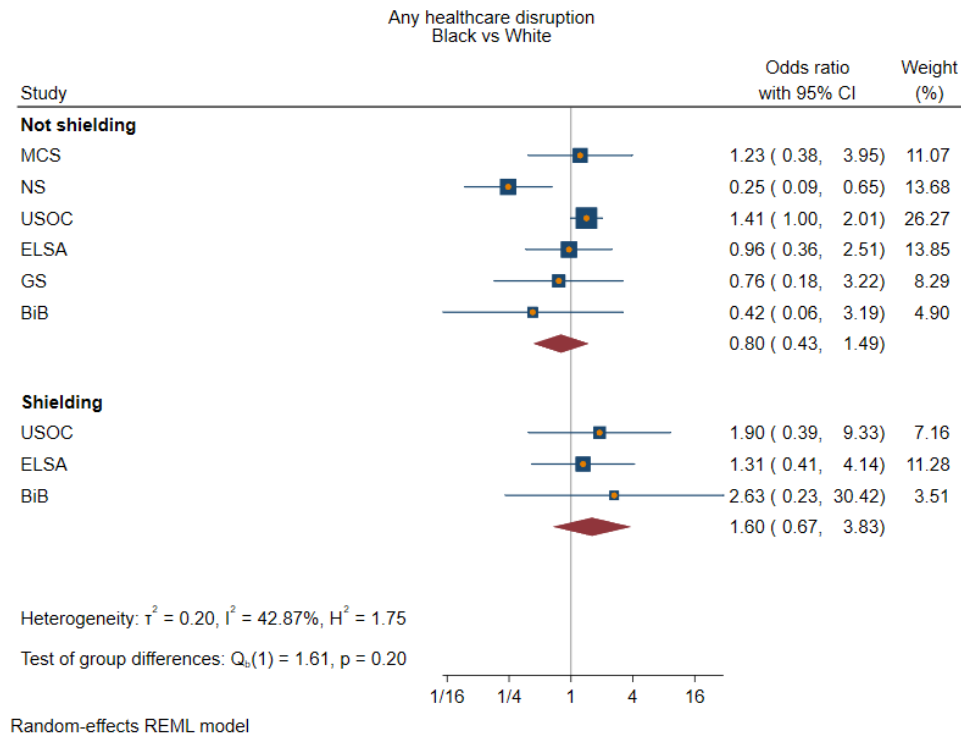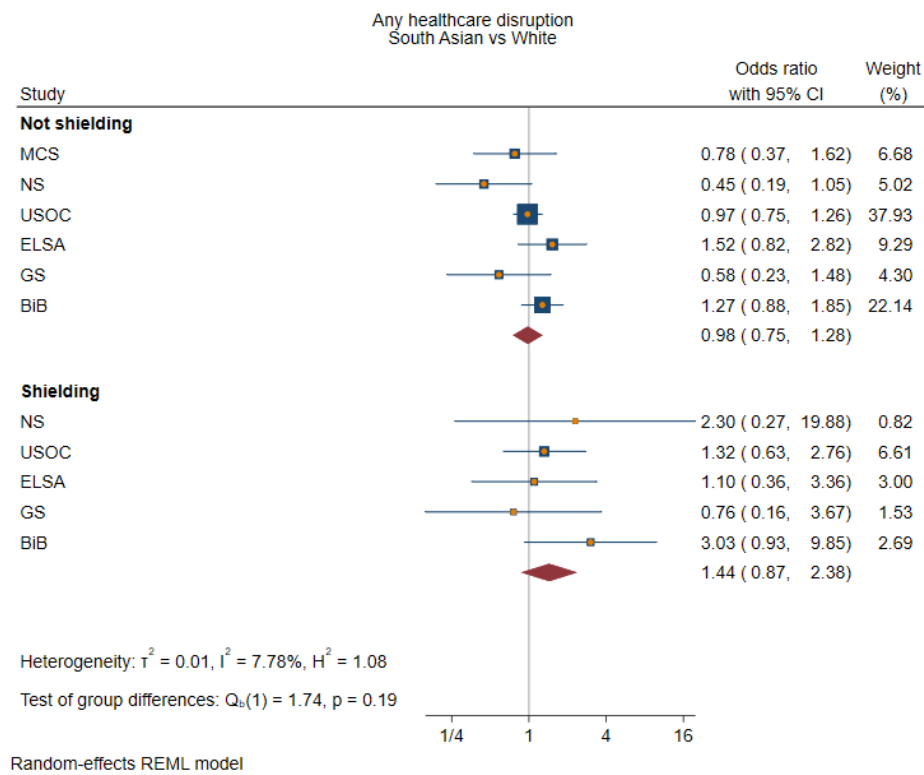

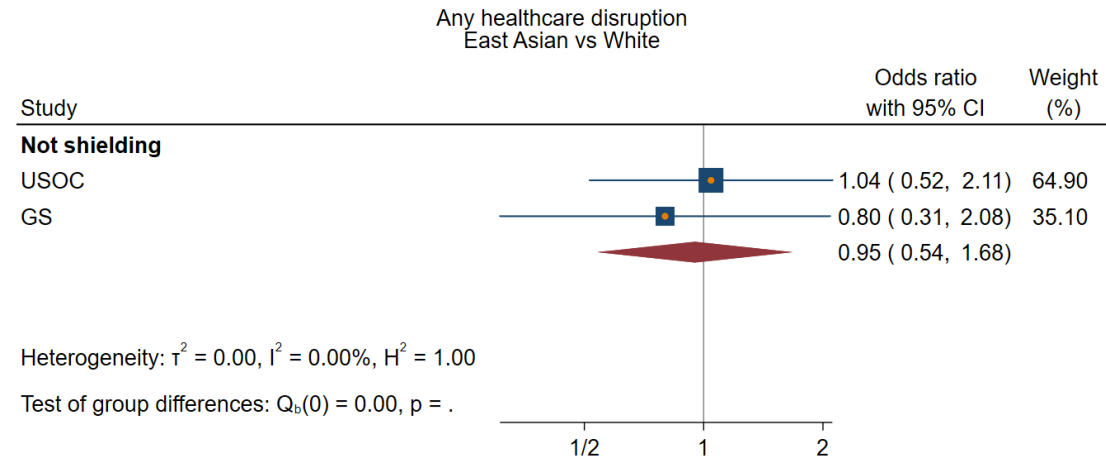

Random-effects REML model

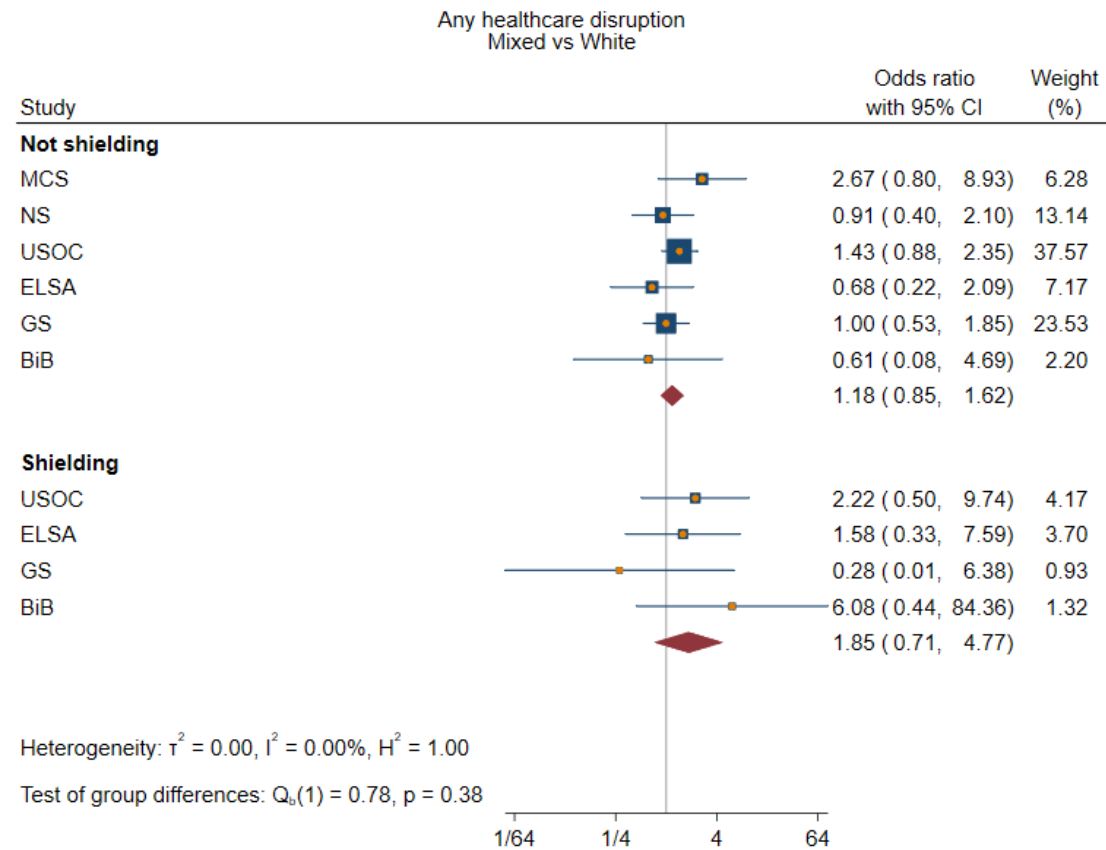

Random-effects REML model

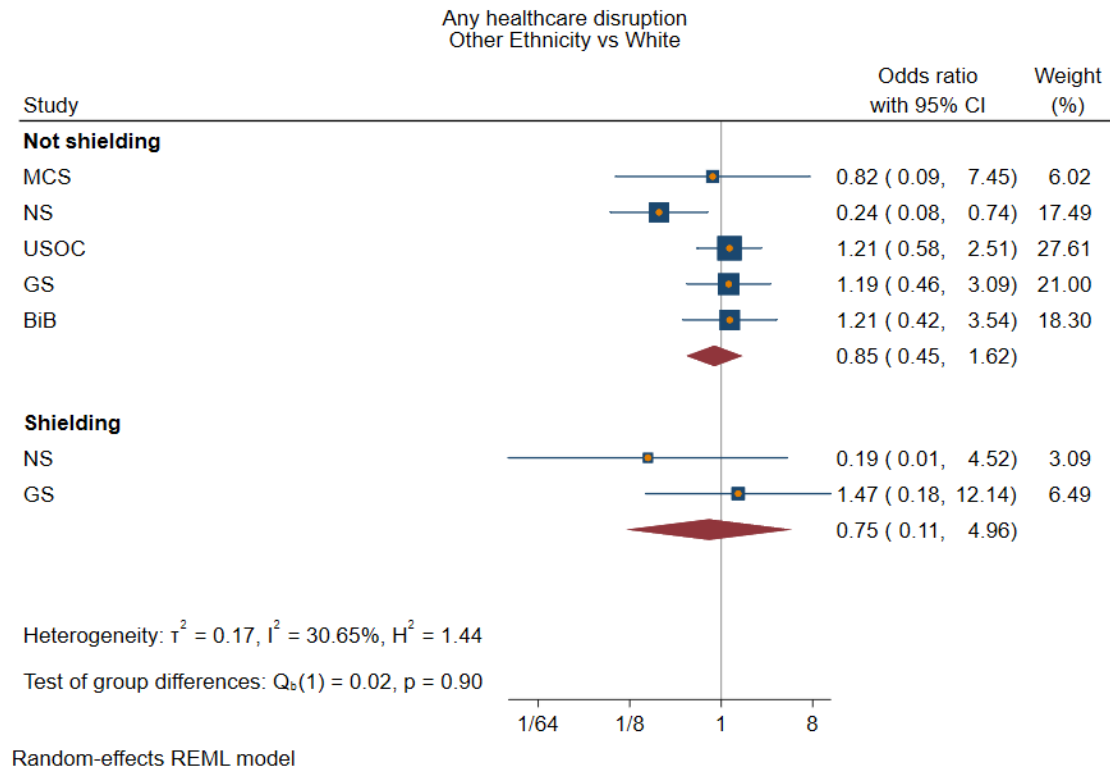

### Any healthcare disruption stratified by age

Sex

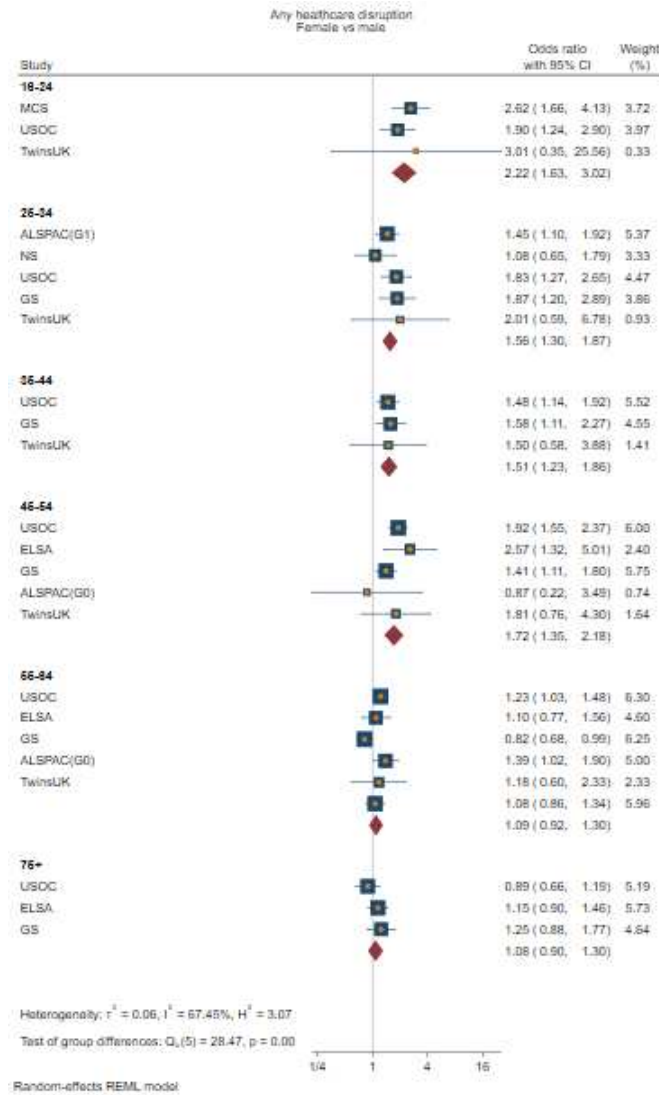



Occupational class

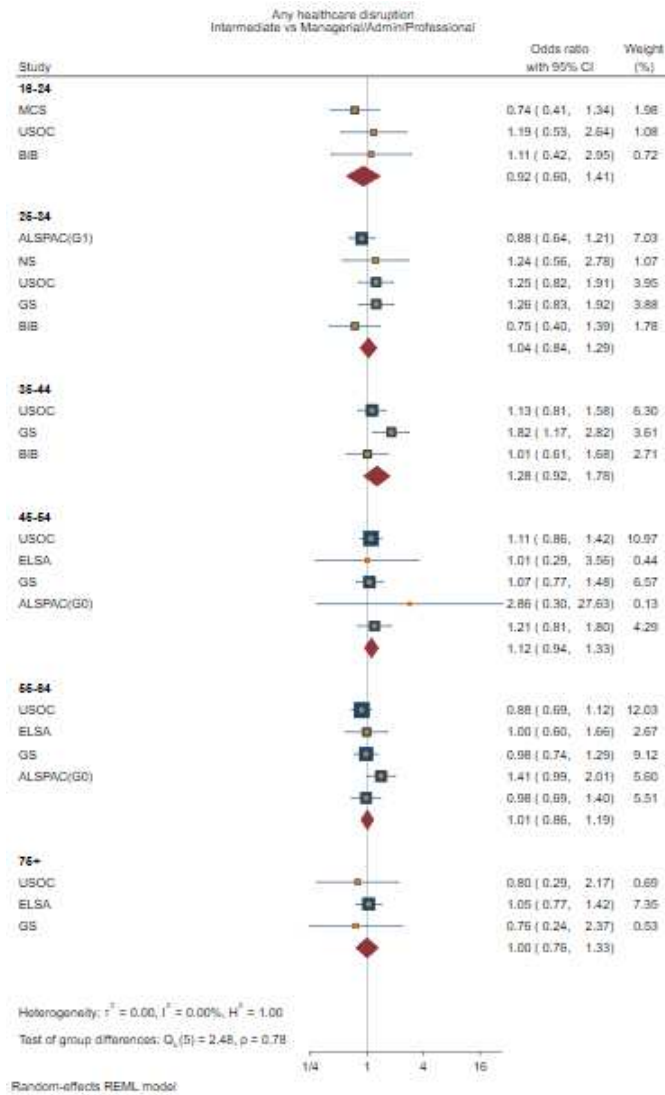

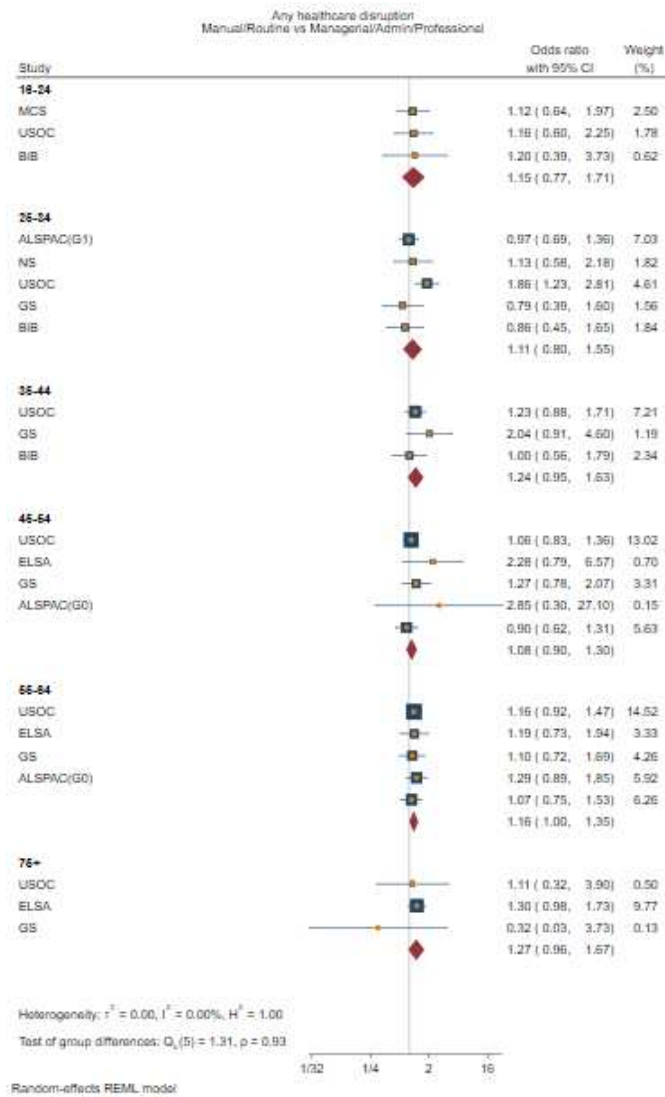

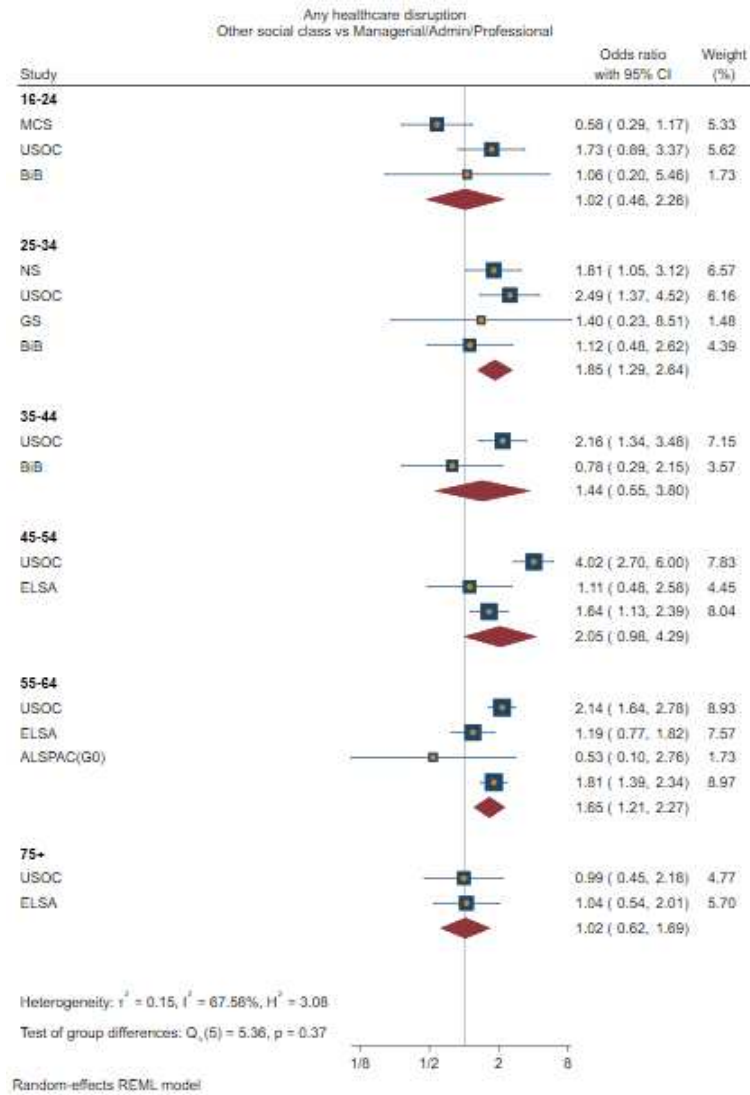

Education

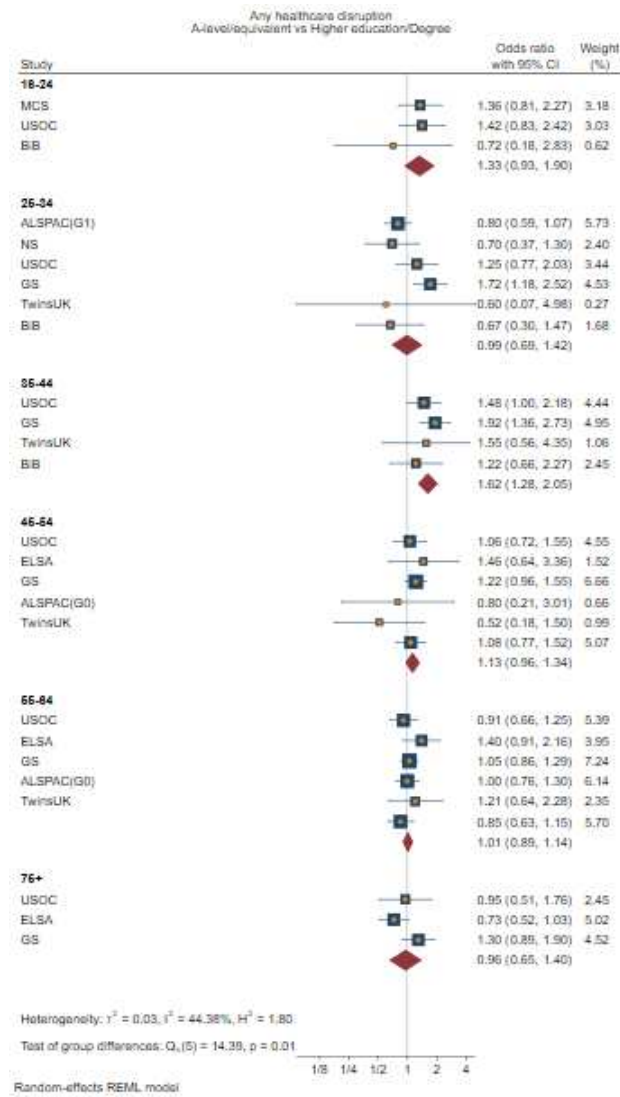

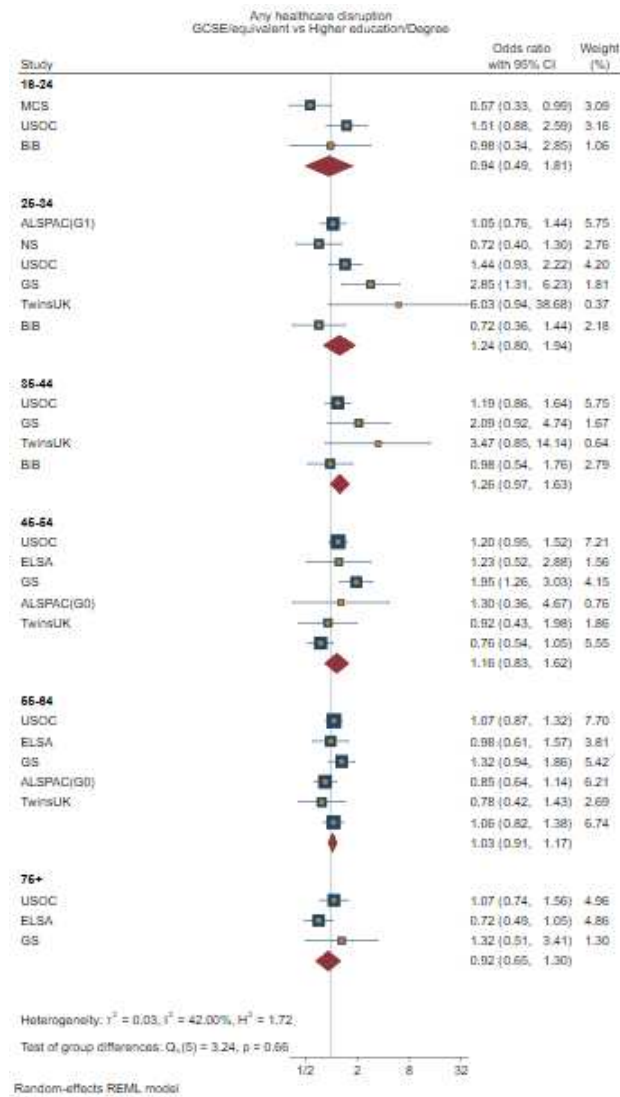

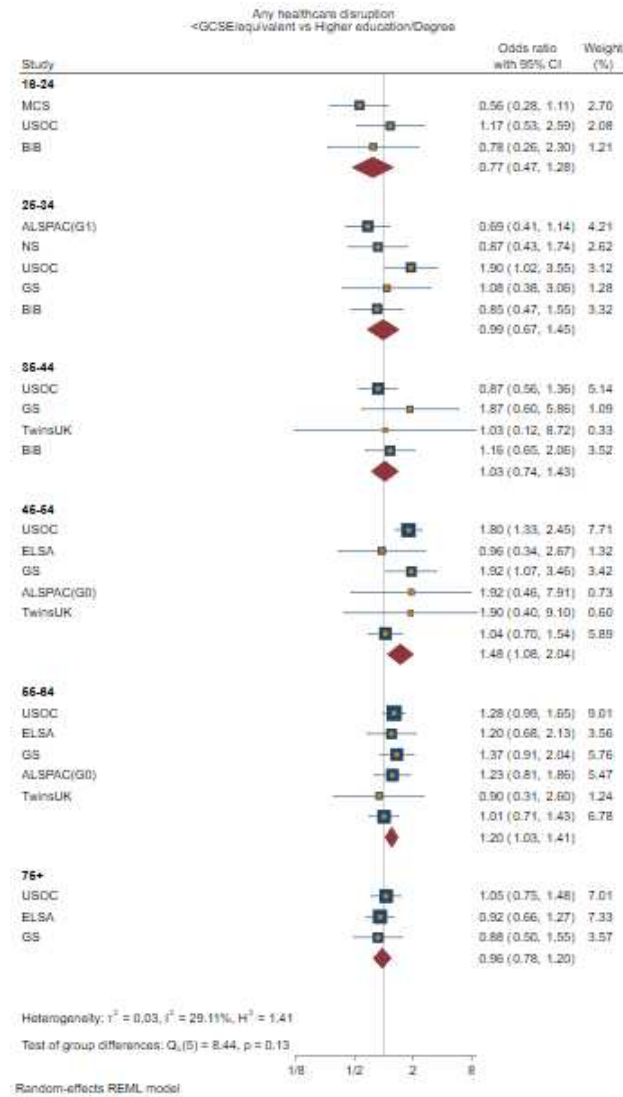

Ethnicity

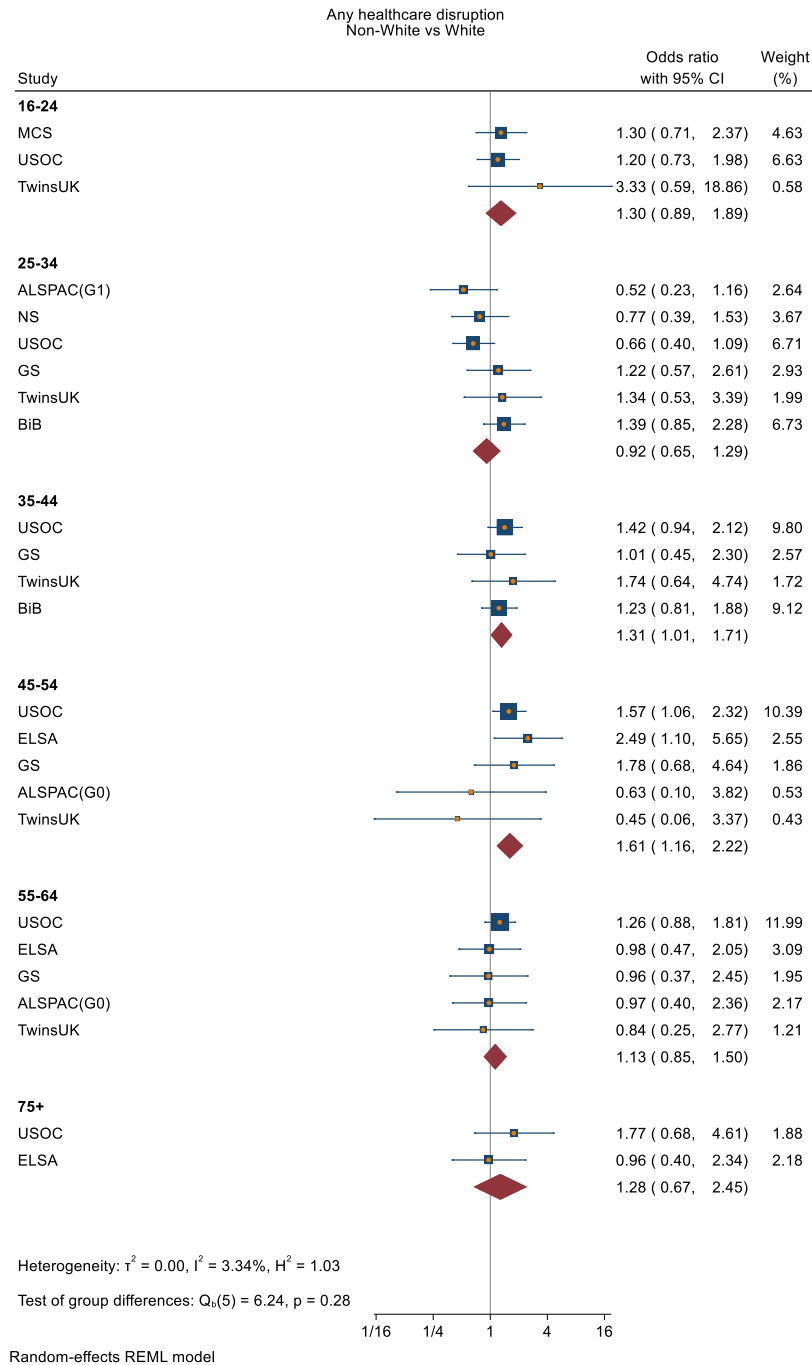

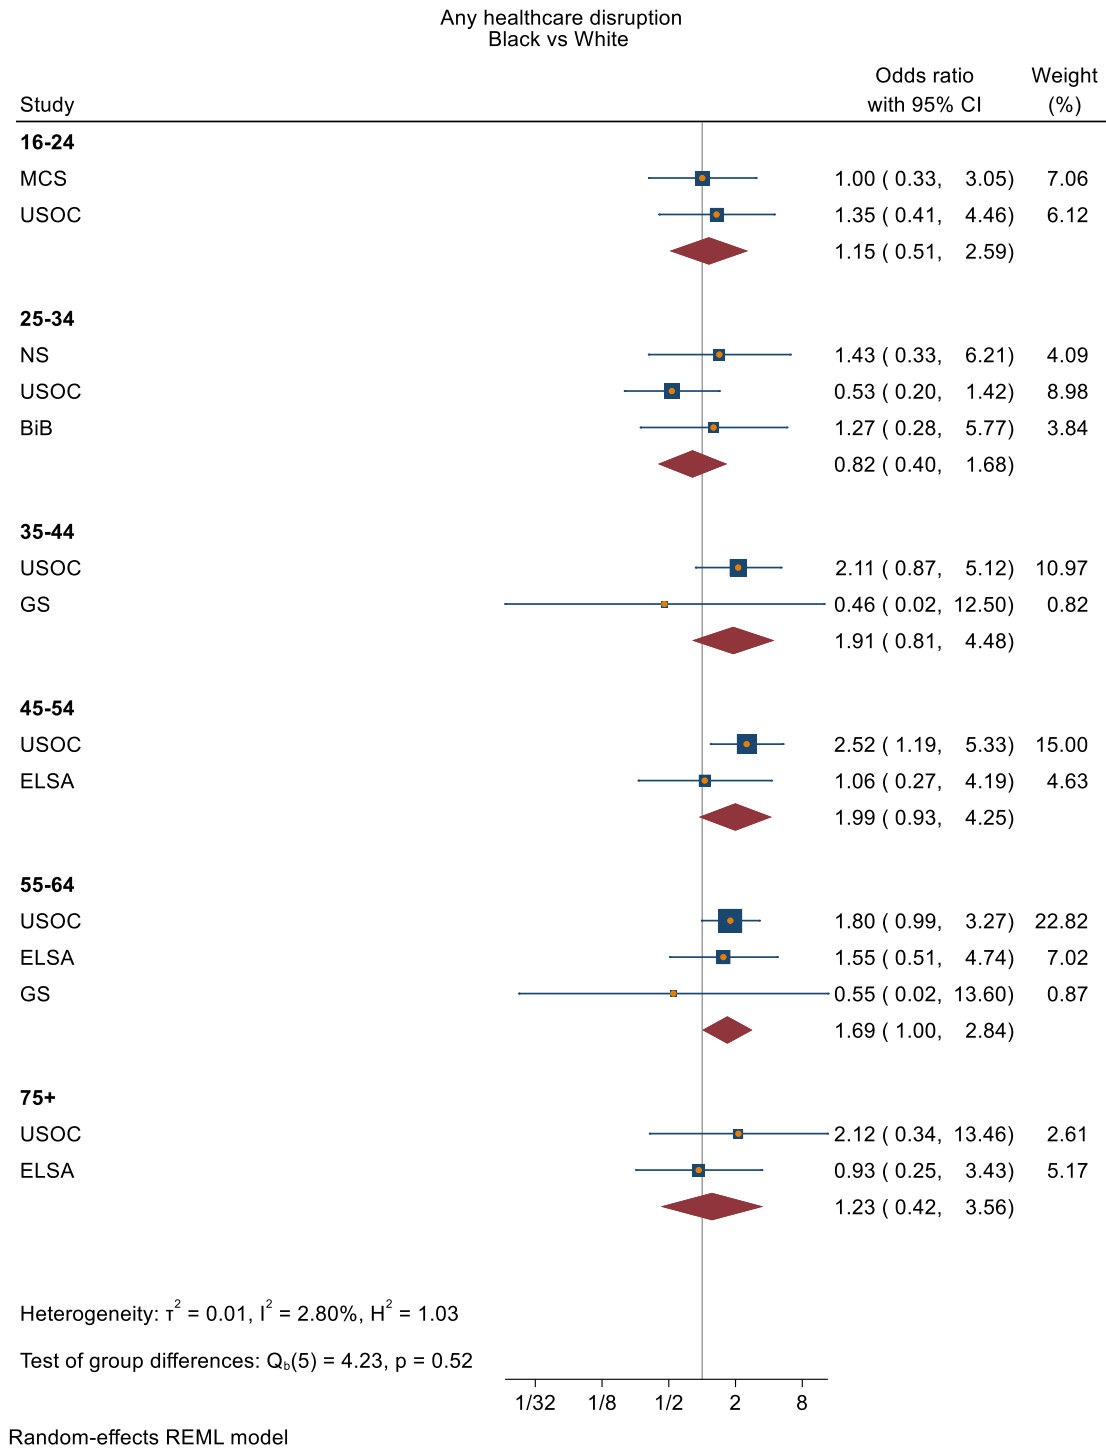



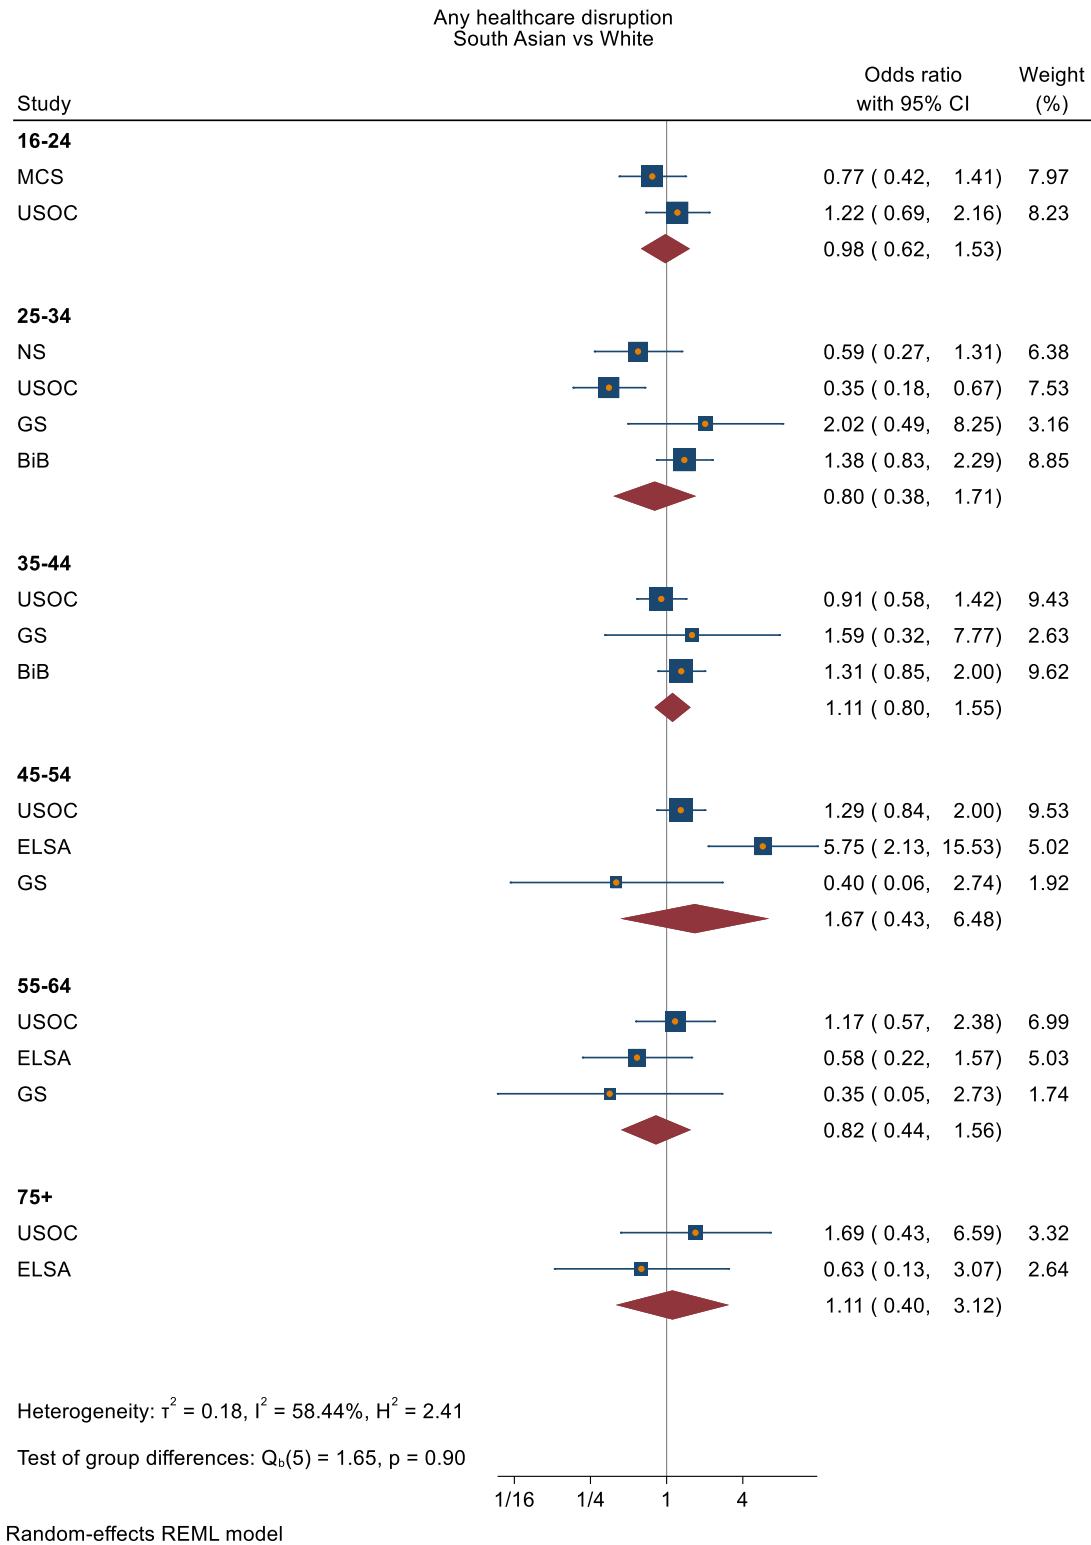

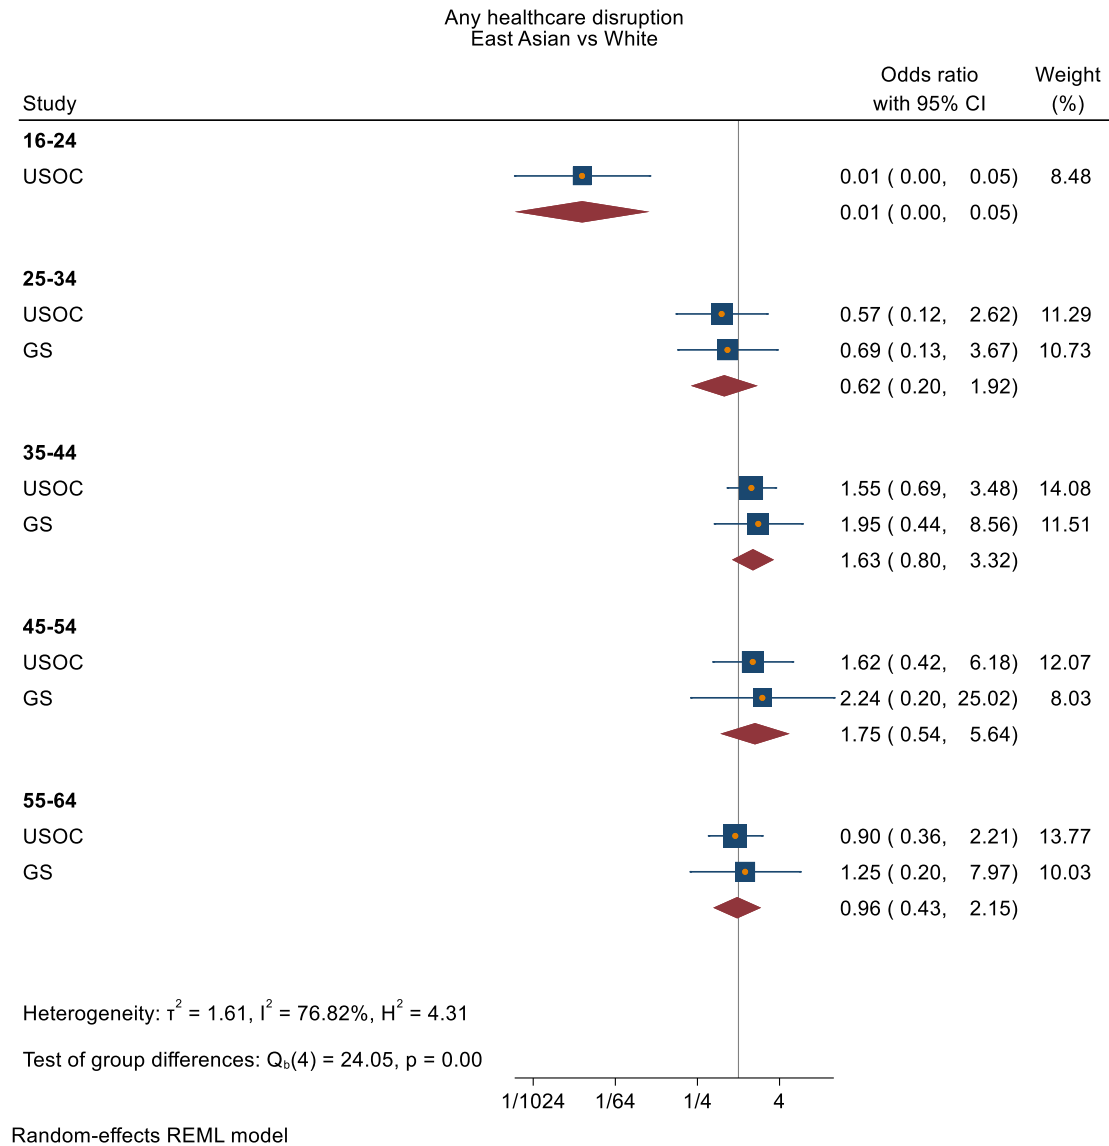

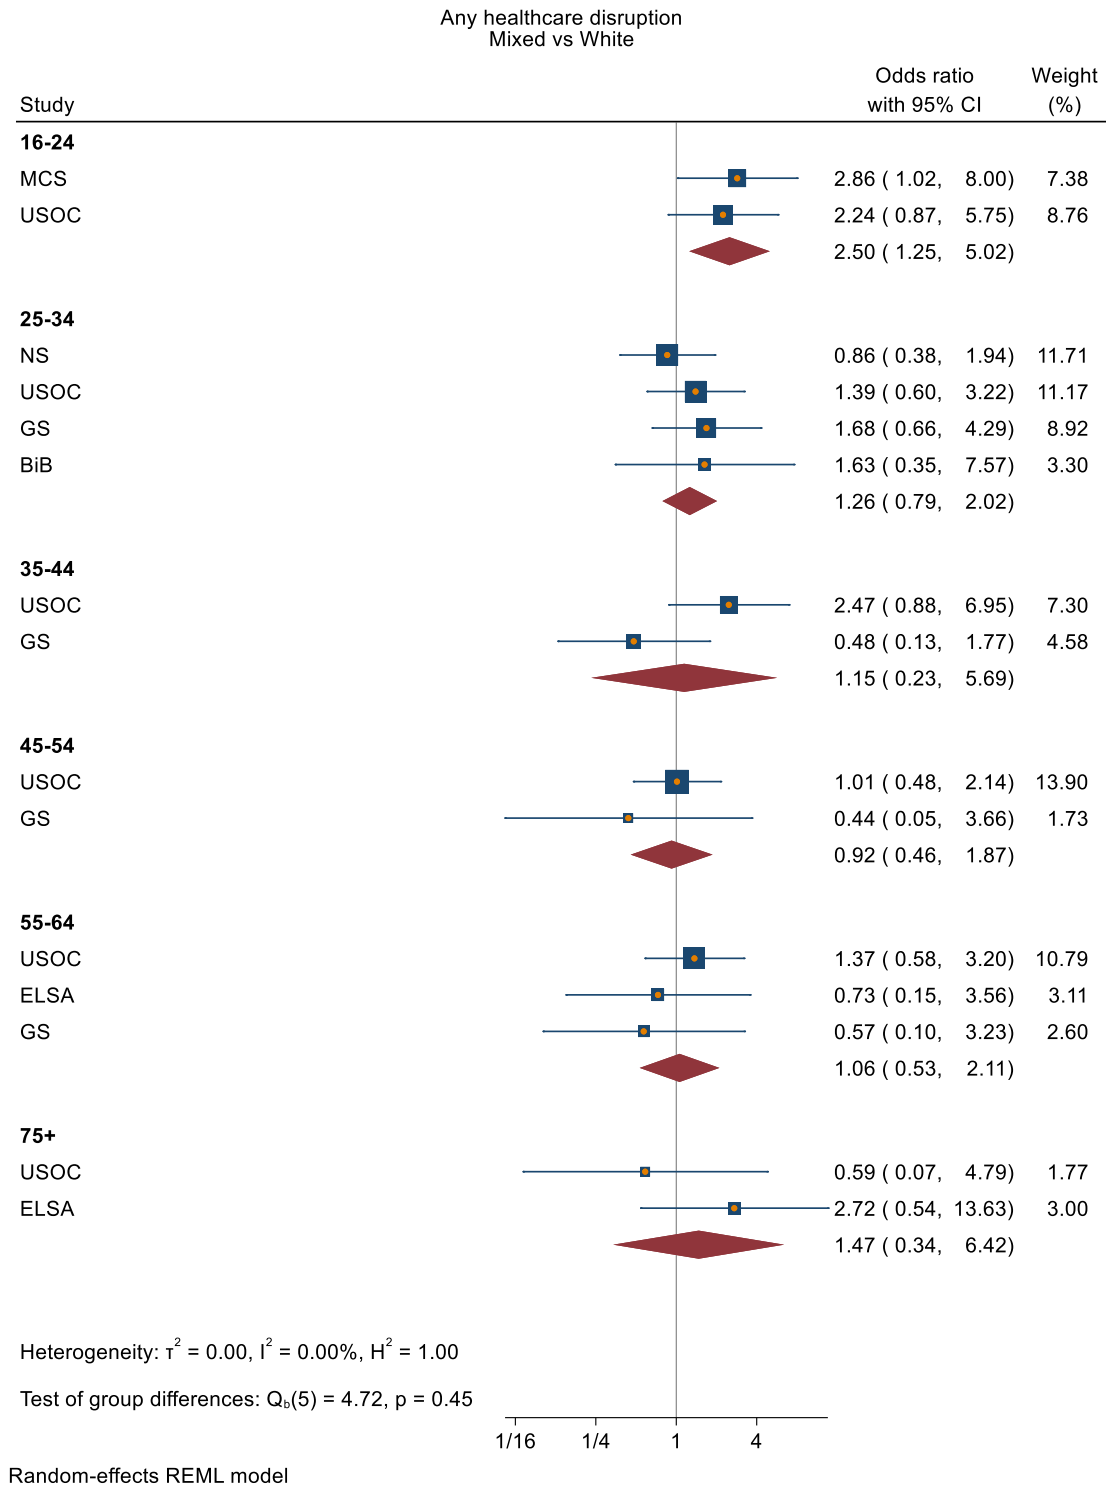

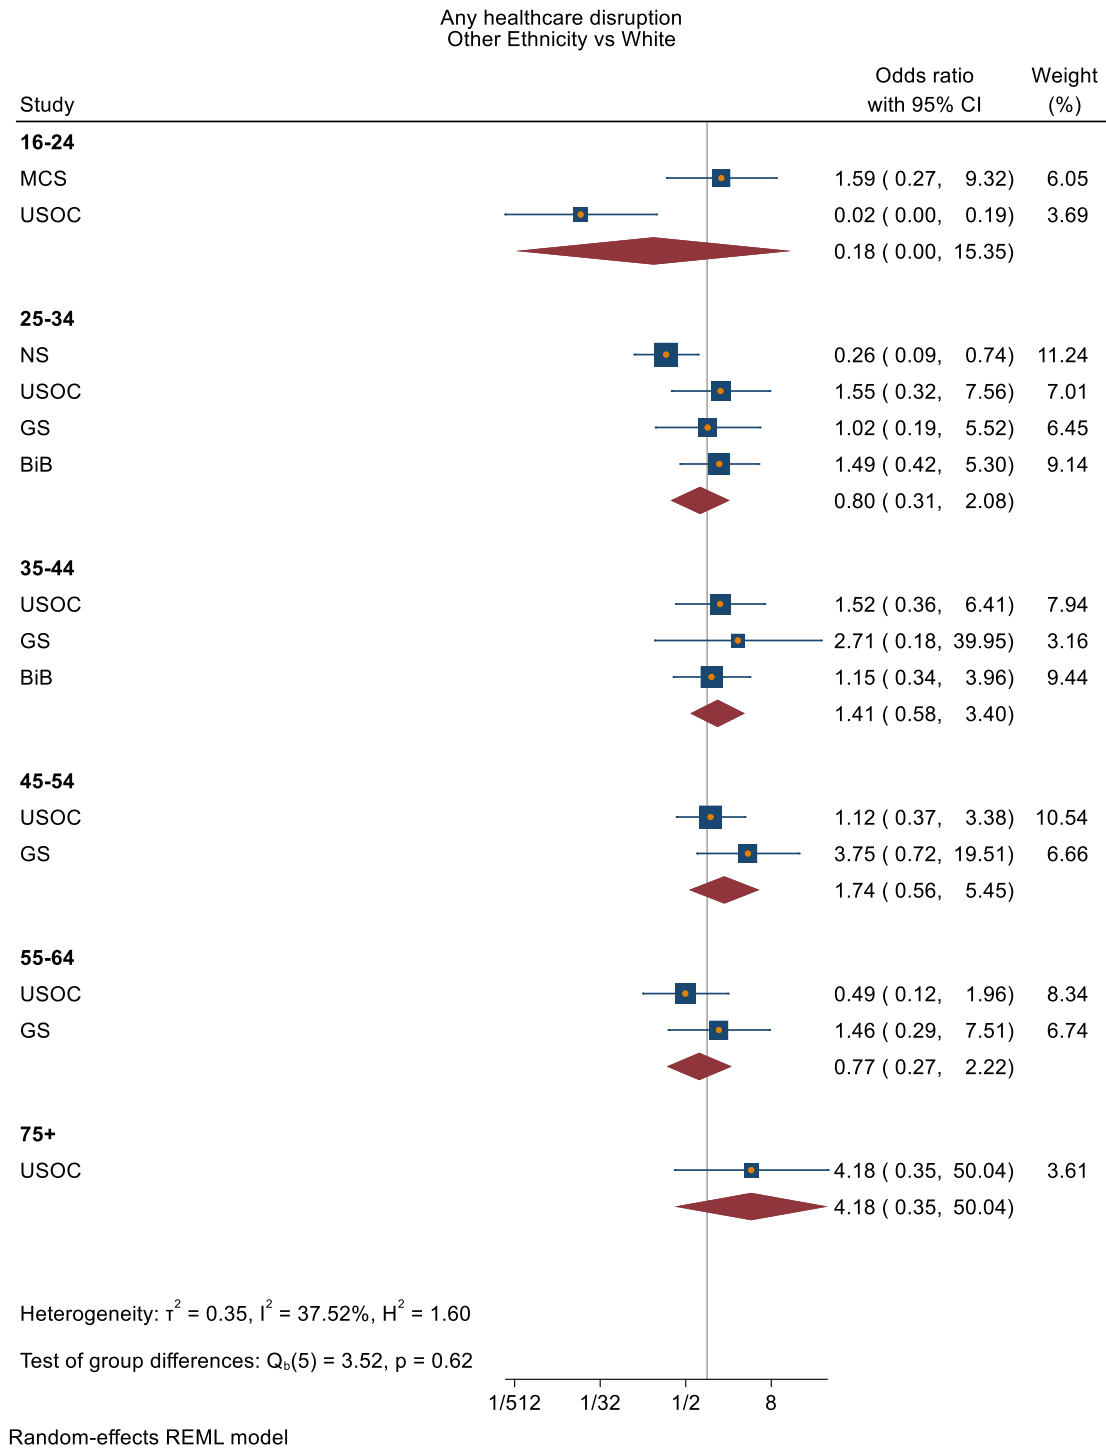

Supplement: bmjopen-2022-064981supp003.pdf [file bmjopen-2022-064981supp003.pdf]
