# Supplementary material for: Inequalities in healthcare disruptions during the COVID-19 pandemic: evidence from 12 UK population-based longitudinal studies
Source: PubMed Central journal article supplement (PMC9561494; doi:10.1136/bmjopen-2022-064981), 2022-10-13
Supplement: bmjopen-2022-064981supp001.pdf [file bmjopen-2022-064981supp001.pdf]

## Supplementary File 1: Meta-analysis summary restricted to representative studies

Note: ALSPAC, GS, TwinsUK and BiB

excluded. **Summary of results**

|                  |                         | Any healthcare disruption |             |             |                  | Appointments   |             |             |                  | Prescription/Medication |             |             |                  | Procedures/surgery |             |             |                  |
|------------------|-------------------------|---------------------------|-------------|-------------|------------------|----------------|-------------|-------------|------------------|-------------------------|-------------|-------------|------------------|--------------------|-------------|-------------|------------------|
|                  |                         | OR                        | Lower CI    | Upper CI    | I <sup>2</sup> % | OR             | Lower CI    | Upper CI    | I <sup>2</sup> % | OR                      | Lower CI    | Upper CI    | I <sup>2</sup> % | OR                 | Lower CI    | Upper CI    | I <sup>2</sup> % |
| <b>Sex</b>       |                         |                           |             |             |                  |                |             |             |                  |                         |             |             |                  |                    |             |             |                  |
| Female vs. Male  | Unadjusted <sup>†</sup> | 1.27                      | 1.19        | 1.36        | 0                | 1.29           | 1.18        | 1.42        | 5.66             | 1.39                    | 0.90        | 2.14        | 73.3             | 1.24               | 1.13        | 1.37        | 0                |
|                  | <b>Basic adjustment</b> | <b>1.34</b>               | <b>1.15</b> | <b>1.57</b> | <b>65.33</b>     | <b>1.36</b>    | <b>1.25</b> | <b>1.47</b> | <b>0</b>         | <b>1.37</b>             | <b>0.86</b> | <b>2.16</b> | <b>74.9</b>      | <b>1.27</b>        | <b>1.12</b> | <b>1.43</b> | <b>11.85</b>     |
|                  | Full adjustment         | 1.34                      | 1.15        | 1.56        | 61.89            | 1.34           | 0.94        | 1.91        |                  | 1.99                    | 0.77        | 5.12        |                  | 1.21               | 1.01        | 1.44        |                  |
| <b>Age</b>       |                         |                           |             |             |                  |                |             |             |                  |                         |             |             |                  |                    |             |             |                  |
| 16-24y vs 45-54y | Unadjusted              | 0.50                      | 0.41        | 0.62        |                  | 0.43           | 0.34        | 0.54        |                  | 0.65                    | 0.42        | 1.02        |                  | 0.48               | 0.34        | 0.68        |                  |
|                  | <b>Basic adjustment</b> | <b>0.49</b>               | <b>0.39</b> | <b>0.60</b> |                  | <b>0.42</b>    | <b>0.33</b> | <b>0.52</b> |                  | <b>0.62</b>             | <b>0.39</b> | <b>0.97</b> |                  | <b>0.47</b>        | <b>0.33</b> | <b>0.66</b> |                  |
|                  | Full adjustment         | 0.47                      | 0.37        | 0.61        |                  | no information |             |             |                  | no information          |             |             |                  | no information     |             |             |                  |
| 25-34y vs 45-54y | Unadjusted              | 0.71                      | 0.58        | 0.86        |                  | 0.65           | 0.53        | 0.80        |                  | 0.97                    | 0.66        | 1.44        |                  | 0.78               | 0.57        | 1.07        |                  |
|                  | <b>Basic adjustment</b> | <b>0.70</b>               | <b>0.58</b> | <b>0.85</b> |                  | <b>0.64</b>    | <b>0.52</b> | <b>0.79</b> |                  | <b>0.97</b>             | <b>0.65</b> | <b>1.43</b> |                  | <b>0.77</b>        | <b>0.56</b> | <b>1.06</b> |                  |
|                  | Full adjustment         | 0.77                      | 0.63        | 0.94        |                  | no information |             |             |                  | no information          |             |             |                  | no information     |             |             |                  |
| 35-44y vs 45-54y | Unadjusted              | 0.74                      | 0.63        | 0.88        |                  | 0.70           | 0.58        | 0.83        |                  | 0.83                    | 0.58        | 1.18        |                  | 0.88               | 0.69        | 1.12        |                  |
|                  | <b>Basic adjustment</b> | <b>0.74</b>               | <b>0.63</b> | <b>0.87</b> |                  | <b>0.69</b>    | <b>0.58</b> | <b>0.82</b> |                  | <b>0.83</b>             | <b>0.58</b> | <b>1.18</b> |                  | <b>0.87</b>        | <b>0.68</b> | <b>1.11</b> |                  |
|                  | Full adjustment         | 0.86                      | 0.73        | 1.03        |                  | no information |             |             |                  | no information          |             |             |                  | no information     |             |             |                  |
| 55-64y vs 45-54y | Unadjusted              | 1.40                      | 1.23        | 1.59        | 0                | 1.37           | 1.19        | 1.58        | 0                | 0.75                    | 0.27        | 2.07        | 67.1             | 1.51               | 1.26        | 1.80        | 0                |
|                  | <b>Basic adjustment</b> | <b>1.42</b>               | <b>1.25</b> | <b>1.61</b> | <b>0</b>         | <b>1.39</b>    | <b>1.21</b> | <b>1.60</b> | <b>0</b>         | <b>0.80</b>             | <b>0.30</b> | <b>2.09</b> | <b>64.1</b>      | <b>1.52</b>        | <b>1.28</b> | <b>1.80</b> | <b>0</b>         |
|                  | Full adjustment         | 1.21                      | 1.06        | 1.40        | 0                | 1.04           | 0.48        | 2.25        |                  | 0.52                    | 0.16        | 1.68        |                  | 1.37               | 0.93        | 2.01        |                  |

|                      |                         |             |             |             |              |                |             |             |             |                |             |             |             |                       |             |             |              |
|----------------------|-------------------------|-------------|-------------|-------------|--------------|----------------|-------------|-------------|-------------|----------------|-------------|-------------|-------------|-----------------------|-------------|-------------|--------------|
| 65-74y vs 45-54y     | Unadjusted              | 1.72        | 1.51        | 1.96        | 0            | 1.57           | 1.21        | 2.04        | 16.9        | 0.76           | 0.31        | 1.86        | 59.6        | 1.93                  | 1.63        | 2.30        | 0            |
|                      | <b>Basic adjustment</b> | <b>1.78</b> | <b>1.56</b> | <b>2.02</b> | <b>0</b>     | <b>1.67</b>    | <b>1.42</b> | <b>1.97</b> | <b>2.81</b> | <b>0.85</b>    | <b>0.38</b> | <b>1.91</b> | <b>52.9</b> | <b>1.98</b>           | <b>1.67</b> | <b>2.34</b> | <b>0</b>     |
|                      | Full adjustment         | 1.35        | 1.14        | 1.58        | 0            | 1.01           | 0.42        | 2.43        |             | 1.41           | 0.34        | 5.89        |             | 1.55                  | 1.05        | 2.30        |              |
| 75y+ vs 45-54y       | Unadjusted              | 1.97        | 1.68        | 2.31        | 1.58         | 1.87           | 1.56        | 2.24        | 0           | 0.89           | 0.59        | 1.35        | 6.53        | 2.10                  | 1.46        | 3.02        | 66.45        |
|                      | <b>Basic adjustment</b> | <b>2.06</b> | <b>1.76</b> | <b>2.41</b> | <b>0</b>     | <b>1.97</b>    | <b>1.64</b> | <b>2.35</b> | <b>0</b>    | <b>0.98</b>    | <b>0.68</b> | <b>1.42</b> | <b>0</b>    | <b>2.14</b>           | <b>1.57</b> | <b>2.91</b> | <b>55.32</b> |
|                      | Full adjustment         | 1.38        | 1.13        | 1.70        | 0.00         | 1.07           | 0.44        | 2.61        |             | 1.26           | 0.39        | 4.02        |             | 1.75                  | 1.17        | 2.62        |              |
| <b>Ethnicity</b>     |                         |             |             |             |              |                |             |             |             |                |             |             |             |                       |             |             |              |
| Non-White vs White*  | Unadjusted              | 0.96        | 0.82        | 1.12        | 0            | 1.02           | 0.72        | 1.46        | 44.4        | 1.02           | 0.39        | 2.67        | 84.8        | 0.90                  | 0.71        | 1.14        | 0            |
|                      | <b>Basic adjustment</b> | <b>1.23</b> | <b>1.05</b> | <b>1.44</b> | <b>0</b>     | <b>1.25</b>    | <b>0.87</b> | <b>1.81</b> | <b>48.3</b> | <b>1.06</b>    | <b>0.42</b> | <b>2.67</b> | <b>83.1</b> | <b>1.16</b>           | <b>0.91</b> | <b>1.47</b> | <b>0</b>     |
|                      | Full adjustment         | 1.10        | 0.94        | 1.29        | 0            | 1.39           | 0.61        | 3.20        |             | 2.04           | 0.70        | 5.98        |             | 0.96                  | 0.63        | 1.48        |              |
| Black vs White       | Unadjusted              | 1.22        | 0.91        | 1.65        | 0            | 1.02           | 0.53        | 1.94        | 48.5        | 0.49           | 0.07        | 3.52        | 85.4        | 0.87                  | 0.58        | 1.31        | 0            |
|                      | <b>Basic adjustment</b> | <b>1.47</b> | <b>1.08</b> | <b>1.98</b> | <b>0</b>     | <b>1.18</b>    | <b>0.57</b> | <b>2.44</b> | <b>59.3</b> | <b>0.50</b>    | <b>0.08</b> | <b>3.36</b> | <b>84</b>   | <b>1.03</b>           | <b>0.68</b> | <b>1.55</b> | <b>0</b>     |
|                      | Full adjustment         | 1.20        | 0.92        | 1.58        | 0            | 0.88           | 0.18        | 4.22        |             | 0.37           | 0.04        | 3.11        |             | 0.87                  | 0.41        | 1.82        |              |
| East Asian vs White  | Unadjusted              | 0.82        | 0.38        | 1.73        |              | 0.79           | 0.35        | 1.80        |             | 0.97           | 0.47        | 1.97        |             | 1.38                  | 0.47        | 4.02        |              |
|                      | <b>Basic adjustment</b> | <b>1.04</b> | <b>0.53</b> | <b>2.06</b> |              | <b>1.03</b>    | <b>0.49</b> | <b>2.16</b> |             | <b>1.04</b>    | <b>0.52</b> | <b>2.09</b> |             | <b>1.80</b>           | <b>0.65</b> | <b>4.99</b> |              |
|                      | Full adjustment         | 1.01        | 0.60        | 1.68        |              | no information |             |             |             | no information |             |             |             | no information        |             |             |              |
| Mixed vs White       | Unadjusted              | 1.13        | 0.82        | 1.57        | 0            | 1.27           | 0.49        | 3.29        | 77.5        | 1.53           | 0.90        | 2.60        | 0           | 1.12                  | 0.70        | 1.80        | 0            |
|                      | <b>Basic adjustment</b> | <b>1.38</b> | <b>0.88</b> | <b>2.17</b> | <b>34.69</b> | <b>1.47</b>    | <b>0.59</b> | <b>3.67</b> | <b>75.1</b> | <b>1.67</b>    | <b>0.98</b> | <b>2.86</b> | <b>0</b>    | <b>no information</b> |             |             |              |
|                      | Full adjustment         | 1.36        | 0.88        | 2.11        | 24.01        | no information |             |             |             | 0.93           | 0.10        | 8.48        |             | 0.85                  | 0.32        | 2.21        |              |
| South Asian vs White | Unadjusted              | 0.76        | 0.58        | 1.01        | 29.78        | 0.84           | 0.56        | 1.25        | 38.6        | 0.80           | 0.17        | 3.77        | 93.2        | 0.70                  | 0.45        | 1.09        | 28.01        |
|                      | <b>Basic adjustment</b> | <b>1.02</b> | <b>0.84</b> | <b>1.24</b> | <b>0</b>     | <b>1.05</b>    | <b>0.84</b> | <b>1.31</b> | <b>0</b>    | <b>0.83</b>    | <b>0.18</b> | <b>3.76</b> | <b>92.4</b> | <b>0.90</b>           | <b>0.64</b> | <b>1.26</b> | <b>0</b>     |
|                      | Full adjustment         | 0.95        | 0.72        | 1.25        | 21.29        | 2.65           | 1.03        | 6.82        |             | 4.47           | 1.38        | 14.50       |             | 1.11                  | 0.62        | 1.99        |              |

|                                                                 |                             |             |             |             |              |                |             |             |                |             |             |                |              |             |             |             |              |
|-----------------------------------------------------------------|-----------------------------|-------------|-------------|-------------|--------------|----------------|-------------|-------------|----------------|-------------|-------------|----------------|--------------|-------------|-------------|-------------|--------------|
| Other<br>Ethnicity vs<br>White                                  | Unadjusted                  | 0.56        | 0.25        | 1.25        | 40.34        | 0.82           | 0.45        | 1.49        | 0              | 0.70        | 0.14        | 3.54           | 63.29        | 0.81        | 0.11        | 6.21        | 67.17        |
|                                                                 | <b>Basic<br/>adjustment</b> | <b>0.72</b> | <b>0.25</b> | <b>2.07</b> | <b>64.12</b> | <b>1.02</b>    | <b>0.41</b> | <b>2.51</b> | <b>48.38</b>   | <b>0.96</b> | <b>0.17</b> | <b>5.25</b>    | <b>66.68</b> | <b>0.82</b> | <b>0.08</b> | <b>8.51</b> | <b>74.76</b> |
|                                                                 | Full adjustment             | 0.72        | 0.25        | 2.02        | 64.08        | no information |             |             | no information |             |             | no information |              |             |             |             |              |
| <b>Education</b>                                                |                             |             |             |             |              |                |             |             |                |             |             |                |              |             |             |             |              |
| A-<br>level/equiv<br>alent vs<br>Higher<br>education/D<br>egree | Unadjusted                  | 1.02        | 0.85        | 1.22        | 53.07        | 1.02           | 0.84        | 1.25        | 39.4           | 0.94        | 0.68        | 1.30           | 26.88        | 0.68        | 0.37        | 1.28        | 90.63        |
|                                                                 | <b>Basic<br/>adjustment</b> | <b>1.11</b> | <b>0.99</b> | <b>1.25</b> | <b>8.05</b>  | <b>1.13</b>    | <b>0.99</b> | <b>1.29</b> | <b>1.31</b>    | <b>0.92</b> | <b>0.71</b> | <b>1.19</b>    | <b>0</b>     | <b>0.73</b> | <b>0.38</b> | <b>1.39</b> | <b>91.07</b> |
|                                                                 | Full adjustment             | 0.98        | 0.85        | 1.12        | 21.18        | 0.98           | 0.59        | 1.63        |                | 3.39        | 1.04        | 11.09          |              | 1.05        | 0.83        | 1.32        |              |
| GCSE/equiv<br>alent vs<br>Higher<br>education/D<br>egree        | Unadjusted                  | 0.96        | 0.84        | 1.10        | 36.2         | 0.96           | 0.84        | 1.11        | 19.4           | 0.95        | 0.69        | 1.30           | 39.93        | 1.01        | 0.89        | 1.14        | 0            |
|                                                                 | <b>Basic<br/>adjustment</b> | <b>0.94</b> | <b>0.79</b> | <b>1.12</b> | <b>55.76</b> | <b>0.91</b>    | <b>0.73</b> | <b>1.13</b> | <b>53.46</b>   | <b>0.96</b> | <b>0.68</b> | <b>1.35</b>    | <b>45.45</b> | <b>1.04</b> | <b>0.92</b> | <b>1.19</b> | <b>0</b>     |
|                                                                 | Full adjustment             | 0.84        | 0.73        | 0.95        | 24.18        | 0.63           | 0.36        | 1.10        |                | 1.96        | 0.59        | 6.47           |              | 0.81        | 0.62        | 1.04        |              |
| <GCSE/equi<br>valent vs<br>Higher<br>education/D<br>egree       | Unadjusted                  | 1.13        | 0.89        | 1.43        | 72.27        | 1.06           | 0.83        | 1.36        | 61.17          | 1.22        | 0.77        | 1.94           | 58.91        | 1.38        | 1.21        | 1.58        | 0            |
|                                                                 | <b>Basic<br/>adjustment</b> | <b>1.12</b> | <b>0.96</b> | <b>1.30</b> | <b>33.28</b> | <b>1.04</b>    | <b>0.85</b> | <b>1.27</b> | <b>34.32</b>   | <b>1.25</b> | <b>0.88</b> | <b>1.78</b>    | <b>27.88</b> | <b>1.20</b> | <b>1.04</b> | <b>1.38</b> | <b>0</b>     |
|                                                                 | Full adjustment             | 0.85        | 0.76        | 0.96        | 3.24         | 0.70           | 0.42        | 1.17        |                | 3.22        | 1.01        | 10.27          |              | 0.86        | 0.66        | 1.12        |              |
| <b>Occupational class</b>                                       |                             |             |             |             |              |                |             |             |                |             |             |                |              |             |             |             |              |
| Intermediate<br>vs<br>Managerial/<br>Admin/Profe<br>ssional     | Unadjusted                  | 1.07        | 0.97        | 1.18        | 0            | 1.04           | 0.93        | 1.17        | 0              | 0.99        | 0.74        | 1.35           | 17.14        | 1.15        | 1.00        | 1.32        | 0            |
|                                                                 | <b>Basic<br/>adjustment</b> | <b>1.04</b> | <b>0.94</b> | <b>1.15</b> | <b>0</b>     | <b>1.02</b>    | <b>0.91</b> | <b>1.15</b> | <b>0</b>       | <b>0.96</b> | <b>0.68</b> | <b>1.37</b>    | <b>29.88</b> | <b>1.12</b> | <b>0.98</b> | <b>1.28</b> | <b>0</b>     |
|                                                                 | Full adjustment             | 0.97        | 0.88        | 1.08        | 0            | 1.13           | 0.67        | 1.90        |                | 0.74        | 0.21        | 2.59           |              | 1.05        | 0.84        | 1.31        |              |
| Manual/Rou<br>tine vs<br>Managerial/<br>Admin/Profe<br>ssional  | Unadjusted                  | 1.13        | 0.99        | 1.29        | 29.12        | 1.06           | 0.94        | 1.18        | 0              | 1.30        | 1.00        | 1.68           | 9.9          | 1.13        | 0.91        | 1.41        | 33.75        |
|                                                                 | <b>Basic<br/>adjustment</b> | <b>1.20</b> | <b>1.09</b> | <b>1.32</b> | <b>0</b>     | <b>1.15</b>    | <b>1.03</b> | <b>1.30</b> | <b>0</b>       | <b>1.35</b> | <b>1.01</b> | <b>1.81</b>    | <b>16.85</b> | <b>1.20</b> | <b>1.05</b> | <b>1.37</b> | <b>0</b>     |
|                                                                 | Full adjustment             | 1.03        | 0.93        | 1.15        | 0            | 1.29           | 0.81        | 2.06        |                | 0.75        | 0.27        | 2.13           |              | 1.07        | 0.85        | 1.35        |              |
| Other social<br>class vs                                        | Unadjusted                  | 1.36        | 0.90        | 2.06        | 92.46        | 1.40           | 1.01        | 1.94        | 79.32          | 2.03        | 1.25        | 3.29           | 73.7         | 1.55        | 0.90        | 2.68        | 87.81        |
|                                                                 |                             |             |             |             |              |                |             |             |                |             |             |                |              |             |             |             |              |

|                                   |                             |             |             |             |              |             |             |             |             |          |             |             |             |             |          |             |             |             |              |
|-----------------------------------|-----------------------------|-------------|-------------|-------------|--------------|-------------|-------------|-------------|-------------|----------|-------------|-------------|-------------|-------------|----------|-------------|-------------|-------------|--------------|
| Managerial/<br>Admin/Professional | <b>Basic<br/>adjustment</b> | <b>1.48</b> | <b>1.10</b> | <b>2.00</b> | <b>81.34</b> | <b>1.51</b> | <b>1.18</b> | <b>1.93</b> | <b>56.4</b> | <b>5</b> | <b>2.44</b> | <b>1.71</b> | <b>3.49</b> | <b>45.4</b> | <b>9</b> | <b>1.64</b> | <b>1.10</b> | <b>2.46</b> | <b>72.22</b> |
|                                   | Full adjustment             | 1.19        | 0.99        | 1.42        | 44.84        | 1.39        | 0.80        | 2.42        |             |          | 4.12        | 1.43        | 11.82       |             |          | 0.94        | 0.69        | 1.27        |              |

Basic adjustment: sex, age, and ethnicity (where available)

Full adjustment: sex, age, and ethnicity (where available), education, occupational class, UK Nation (where appropriate), household composition, and pre-pandemic self-reported health.

Empty I<sup>2</sup>% column indicates only one study included

\*Binary variable including Black, East Asian, Mixed, South Asian, and other ethnicity in 'non-White'

**Summary of stratified results**

|                     |               | <b>Any healthcare disruption</b> |          |          |       |
|---------------------|---------------|----------------------------------|----------|----------|-------|
| <b>Sex</b>          |               | OR                               | Lower CI | Upper CI | I2%   |
| Female vs. Male     | Overall       | 1.34                             | 1.15     | 1.57     | 65.33 |
|                     | Not shielding | 1.32                             | 1.09     | 1.61     | 75.25 |
|                     | Shielding     | 1.48                             | 1.20     | 1.83     | 0     |
|                     | 16-24y        | 2.21                             | 1.61     | 3.03     | 3.99  |
|                     | 25-34y        | 1.45                             | 0.86     | 2.43     | 63.72 |
|                     | 35-44y        | 1.48                             | 1.14     | 1.92     |       |
|                     | 45-54         | 1.97                             | 1.61     | 2.42     | 0     |
|                     | 55-64         | 1.16                             | 1.02     | 1.32     | 0     |
|                     | 75+           | 1.03                             | 0.80     | 1.32     | 42.24 |
| <b>Age</b>          |               | OR                               | Lower CI | Upper CI | I2%   |
| 16-24y vs 45-54y    | Overall       | 0.49                             | 0.39     | 0.60     |       |
|                     | Not shielding | 0.50                             | 0.40     | 0.62     |       |
|                     | Shielding     | 0.64                             | 0.23     | 1.78     |       |
| 25-34y vs 45-54y    | Overall       | 0.70                             | 0.58     | 0.85     |       |
|                     | Not shielding | 0.71                             | 0.58     | 0.87     |       |
|                     | Shielding     | 0.86                             | 0.34     | 2.16     |       |
| 35-44y vs 45-54y    | Overall       | 0.74                             | 0.63     | 0.87     |       |
|                     | Not shielding | 0.76                             | 0.64     | 0.90     |       |
|                     | Shielding     | 0.48                             | 0.24     | 0.96     |       |
| 55-64y vs 45-54y    | Overall       | 1.42                             | 1.25     | 1.61     | 0     |
|                     | Not shielding | 1.37                             | 1.20     | 1.57     | 0     |
|                     | Shielding     | 1.32                             | 0.80     | 2.17     | 0     |
| 65-74y vs 45-54y    | Overall       | 1.78                             | 1.56     | 2.02     | 0     |
|                     | Not shielding | 1.67                             | 1.46     | 1.91     | 0     |
|                     | Shielding     | 1.33                             | 0.82     | 2.15     | 0     |
| 75y+ vs 45-54y      | Overall       | 2.06                             | 1.76     | 2.41     | 0     |
|                     | Not shielding | 1.96                             | 1.66     | 2.33     | 0     |
|                     | Shielding     | 1.07                             | 0.65     | 1.78     | 0     |
| <b>Ethnicity</b>    |               | OR                               | Lower CI | Upper CI | I2%   |
| Non-White vs White* | Overall       | 1.23                             | 1.05     | 1.44     | 0     |

|                      |               |         |      |      |       |
|----------------------|---------------|---------|------|------|-------|
|                      | Not shielding | 0.96    | 0.62 | 1.48 | 73.47 |
|                      | Shielding     | 1.56    | 0.97 | 2.49 | 0     |
|                      | 16-24y        | 1.24    | 0.84 | 1.82 | 0     |
|                      | 25-34y        | 0.70    | 0.47 | 1.04 | 0     |
|                      | 35-44y        | 1.42    | 0.94 | 2.12 |       |
|                      | 45-54         | 1.71    | 1.20 | 2.44 | 0     |
|                      | 55-64         | 1.20    | 0.87 | 1.66 | 0     |
|                      | 75+           | 1.28    | 0.67 | 2.45 | 0     |
|                      | Overall       | 1.47    | 1.08 | 1.98 | 0     |
| Black vs White       | Not shielding | 0.84    | 0.38 | 1.83 | 72.85 |
|                      | Shielding     | 1.49    | 0.59 | 3.78 | 0     |
|                      | 16-24y        | 1.15    | 0.51 | 2.59 | 0     |
|                      | 25-34y        | 0.74    | 0.30 | 1.86 | 16.69 |
|                      | 35-44y        | 2.11    | 0.87 | 5.12 |       |
|                      | 45-54         | 1.99    | 0.93 | 4.25 | 15.25 |
|                      | 55-64         | 1.74    | 1.03 | 2.95 | 0     |
|                      | 75+           | 1.23    | 0.42 | 3.56 | 0     |
|                      |               | Overall | 1.04 | 0.53 | 2.06  |
| East Asian vs White  | Not shielding | 1.04    | 0.52 | 2.11 |       |
|                      | Shielding     |         |      |      |       |
|                      | 16-24y        | 0.01    | 0.00 | 0.05 |       |
|                      | 25-34y        | 0.57    | 0.12 | 2.62 |       |
|                      | 35-44y        | 1.55    | 0.69 | 3.48 |       |
|                      | 45-54         | 1.62    | 0.42 | 6.18 |       |
|                      | 55-64         | 0.90    | 0.36 | 2.21 |       |
|                      | 75+           |         |      |      |       |
|                      |               | Overall | 1.38 | 0.88 | 2.17  |
| Mixed vs White       | Not shielding | 1.28    | 0.88 | 1.86 | 0     |
|                      | Shielding     | 1.89    | 0.64 | 5.55 | 0     |
|                      | 16-24y        | 2.50    | 1.25 | 5.02 | 0     |
|                      | 25-34y        | 1.09    | 0.61 | 1.95 | 0     |
|                      | 35-44y        | 2.47    | 0.88 | 6.95 |       |
|                      | 45-54         | 1.01    | 0.48 | 2.14 |       |
|                      | 55-64         | 1.19    | 0.56 | 2.51 | 0     |
|                      | 75+           | 1.47    | 0.34 | 6.42 | 22.46 |
|                      |               | Overall | 1.02 | 0.84 | 1.24  |
| South Asian vs White | Not shielding | 0.92    | 0.64 | 1.34 | 42.86 |
|                      | Shielding     | 1.30    | 0.72 | 2.36 | 0     |
|                      | 16-24y        | 0.98    | 0.62 | 1.53 | 13.95 |

|                                               |                  |      |           |                 |                 |
|-----------------------------------------------|------------------|------|-----------|-----------------|-----------------|
|                                               | 25-34y           | 0.43 | 0.26      | 0.72            | 2.58            |
|                                               | 35-44y           | 0.91 | 0.58      | 1.42            |                 |
|                                               | 45-54            | 2.55 | 0.59      | 10.92           | 86.27           |
|                                               | 55-64            | 0.90 | 0.47      | 1.74            | 19              |
|                                               | 75+              | 1.11 | 0.40      | 3.12            | 0               |
|                                               | Overall          | 0.72 | 0.25      | 2.07            | 64.12           |
| Other Ethnicity vs White                      | Not shielding    | 0.63 | 0.20      | 1.95            | 62.21           |
|                                               | Shielding        | 0.19 | 0.01      | 4.52            |                 |
|                                               | 16-24y           | 0.18 | 0.00      | 15.35           | 88.56           |
|                                               | 25-34y           | 0.57 | 0.10      | 3.20            | 70.09           |
|                                               | 35-44y           | 1.52 | 0.36      | 6.41            |                 |
|                                               | 45-54            | 1.12 | 0.37      | 3.38            |                 |
|                                               | 55-64            | 0.49 | 0.12      | 1.96            |                 |
|                                               | 75+              | 4.18 | 0.35      | 50.04           |                 |
|                                               | <b>Education</b> |      | <b>OR</b> | <b>Lower CI</b> | <b>Upper CI</b> |
| A-level/equivalent vs Higher education/Degree | Overall          | 1.11 | 0.99      | 1.25            | 8.05            |
|                                               | Not shielding    | 1.02 | 0.85      | 1.23            | 47.74           |
|                                               | Shielding        | 0.92 | 0.66      | 1.30            | 0               |
|                                               | 16-24y           | 1.39 | 0.96      | 2.01            | 0               |
|                                               | 25-34y           | 0.97 | 0.55      | 1.71            | 52.33           |
|                                               | 35-44y           | 1.48 | 1.00      | 2.18            |                 |
|                                               | 45-54            | 1.10 | 0.86      | 1.40            | 0               |
|                                               | 55-64            | 0.99 | 0.76      | 1.29            | 44.12           |
|                                               | 75+              | 0.77 | 0.57      | 1.05            | 0               |
| GCSE/equivalent vs Higher education/Degree    | Overall          | 0.94 | 0.79      | 1.12            | 55.76           |
|                                               | Not shielding    | 0.93 | 0.79      | 1.10            | 47.54           |
|                                               | Shielding        | 0.80 | 0.60      | 1.06            | 0               |
|                                               | 16-24y           | 0.93 | 0.36      | 2.40            | 83.45           |
|                                               | 25-34y           | 1.05 | 0.53      | 2.07            | 70.84           |
|                                               | 35-44y           | 1.19 | 0.86      | 1.64            |                 |
|                                               | 45-54            | 1.00 | 0.70      | 1.44            | 60.4            |
|                                               | 55-64            | 1.06 | 0.91      | 1.24            | 0               |
|                                               | 75+              | 0.88 | 0.59      | 1.31            | 54.52           |
| <GCSE/equivalent vs Higher education/Degree   | Overall          | 1.12 | 0.96      | 1.30            | 33.28           |
|                                               | Not shielding    | 1.01 | 0.83      | 1.23            | 50.08           |
|                                               | Shielding        | 0.86 | 0.63      | 1.18            | 8.77            |
|                                               | 16-24y           | 0.79 | 0.38      | 1.61            | 46.71           |
|                                               | 25-34y           | 1.31 | 0.61      | 2.81            | 62.99           |

|                                                        |                  |           |                 |                 |                       |
|--------------------------------------------------------|------------------|-----------|-----------------|-----------------|-----------------------|
|                                                        | 35-44y           | 0.87      | 0.56            | 1.36            |                       |
|                                                        | 45-54            | 1.32      | 0.85            | 2.06            | 61.45                 |
|                                                        | 55-64            | 1.18      | 0.97            | 1.43            | 0                     |
|                                                        | 75+              | 0.98      | 0.78            | 1.24            | 0                     |
| <b>Occupational class</b>                              |                  | <b>OR</b> | <b>Lower CI</b> | <b>Upper CI</b> | <b>I<sup>2</sup>%</b> |
| Intermediate vs<br>Managerial/Admin/Professional       | Overall          | 1.04      | 0.94            | 1.15            | 0                     |
|                                                        | Not<br>shielding | 1.04      | 0.94            | 1.15            | 0                     |
|                                                        | Shielding        | 0.86      | 0.59            | 1.25            | 13.43                 |
|                                                        | 16-24y           | 0.88      | 0.55            | 1.41            | 0                     |
|                                                        | 25-34y           | 1.25      | 0.86            | 1.81            | 0                     |
|                                                        | 35-44y           | 1.13      | 0.81            | 1.58            |                       |
|                                                        | 45-54            | 1.13      | 0.92            | 1.39            | 0                     |
|                                                        | 55-64            | 0.92      | 0.77            | 1.11            | 0                     |
|                                                        | 75+              | 1.02      | 0.76            | 1.37            | 0                     |
| Manual/Routine vs<br>Managerial/Admin/Professional     | Overall          | 1.20      | 1.09            | 1.32            | 0                     |
|                                                        | Not<br>shielding | 1.20      | 1.08            | 1.33            | 0                     |
|                                                        | Shielding        | 0.94      | 0.71            | 1.24            | 0                     |
|                                                        | 16-24y           | 1.14      | 0.74            | 1.75            | 0                     |
|                                                        | 25-34y           | 1.55      | 0.97            | 2.48            | 36.45                 |
|                                                        | 35-44y           | 1.23      | 0.88            | 1.71            |                       |
|                                                        | 45-54            | 1.04      | 0.85            | 1.27            | 0                     |
|                                                        | 55-64            | 1.14      | 0.95            | 1.37            | 0                     |
|                                                        | 75+              | 1.29      | 0.98            | 1.70            | 0                     |
| Other social class vs<br>Managerial/Admin/Professional | Overall          | 1.48      | 1.10            | 2.00            | 81.34                 |
|                                                        | Not<br>shielding | 1.44      | 1.10            | 1.89            | 73.49                 |
|                                                        | Shielding        | 0.92      | 0.38            | 2.22            | 82.67                 |
|                                                        | 16-24y           | 1.01      | 0.34            | 2.95            | 79.64                 |
|                                                        | 25-34y           | 2.09      | 1.40            | 3.13            | 0                     |
|                                                        | 35-44y           | 2.16      | 1.34            | 3.48            |                       |
|                                                        | 45-54            | 2.05      | 0.98            | 4.29            | 85.15                 |
|                                                        | 55-64            | 1.73      | 1.28            | 2.33            | 64.79                 |
|                                                        | 75+              | 1.02      | 0.62            | 1.69            | 0                     |

Adjusted for sex, age, and ethnicity (where available)

Empty I<sup>2</sup>% column indicates only one study included

\*Binary variable including Black, East Asian, Mixed, South Asian, and other ethnicity in 'non-White'
